# Supplementary material for: The antibiotic bedaquiline activates host macrophage innate immune resistance to bacterial infection
Source: eLife. 2020 May 4;9:e55692. doi: 10.7554/eLife.55692 (PMC7200153; doi:10.7554/eLife.55692)
Supplement: Figure 1—source data 1. — FDR < 0.05. [file elife-55692-fig1-data1.xlsx]

## Sheet: Feuil1
ensembl_gene_id	baseMean	log2FoldChange	lfcSE	stat	pvalue	padj	direction	hgnc_symbol	description	chromosome_name	start_position	end_position	band	strand
ENSG00000179163	4388.56	0.69	0.075	9.18	4.30485e-20	8.291e-17	up	FUCA1	alpha-L-fucosidase 1 [Source:HGNC Symbol;Acc:HGNC:4006]	1	23845077	23868294	p36.11	-1
ENSG00000242574	3182.48	0.708	0.1	7.071	1.53511e-12	9.855e-10	up	HLA-DMB	major histocompatibility complex, class II, DM beta [Source:HGNC Symbol;Acc:HGNC:4935]	6	32934629	32941070	p21.32	-1
ENSG00000136235	129035	0.419	0.062	6.805	1.01163e-11	4.871e-09	up	GPNMB	glycoprotein nmb [Source:HGNC Symbol;Acc:HGNC:4462]	7	23235967	23275108	p15.3	1
ENSG00000137193	1255.27	0.718	0.106	6.772	1.27118e-11	5.761e-09	up	PIM1	Pim-1 proto-oncogene, serine/threonine kinase [Source:HGNC Symbol;Acc:HGNC:8986]	6	37170203	37175426	p21.2	1
ENSG00000091490	2436.33	0.679	0.101	6.686	2.29083e-11	9.805e-09	up	SEL1L3	SEL1L family member 3 [Source:HGNC Symbol;Acc:HGNC:29108]	4	25747427	25863760	p15.2	-1
ENSG00000266412	22344.4	0.427	0.064	6.662	2.69674e-11	1.093e-08	up	NCOA4	nuclear receptor coactivator 4 [Source:HGNC Symbol;Acc:HGNC:7671]	10	46005088	46030714	q11.22	-1
ENSG00000162407	1988.61	0.69	0.106	6.486	8.80641e-11	3.297e-08	up	PLPP3	phospholipid phosphatase 3 [Source:HGNC Symbol;Acc:HGNC:9229]	1	56494747	56645301	p32.2	-1
ENSG00000118515	12830	0.383	0.061	6.324	2.55159e-10	7.966e-08	up	SGK1	serum/glucocorticoid regulated kinase 1 [Source:HGNC Symbol;Acc:HGNC:10810]	6	134169246	134318112	q23.2	-1
ENSG00000101290	3298.27	0.435	0.073	5.995	2.03425e-09	4.749e-07	up	CDS2	CDP-diacylglycerol synthase 2 [Source:HGNC Symbol;Acc:HGNC:1801]	20	5126786	5197887	p12.3	1
ENSG00000121966	590.213	0.995	0.167	5.951	2.65748e-09	5.645e-07	up	CXCR4	C-X-C motif chemokine receptor 4 [Source:HGNC Symbol;Acc:HGNC:2561]	2	136114349	136118165	q22.1	-1
ENSG00000146409	1186.59	0.813	0.137	5.952	2.65476e-09	5.645e-07	up	SLC18B1	solute carrier family 18 member B1 [Source:HGNC Symbol;Acc:HGNC:21573]	6	132769370	132798553	q23.2	-1
ENSG00000169495	2426.94	0.482	0.081	5.927	3.0777e-09	6.24e-07	up	HTRA4	HtrA serine peptidase 4 [Source:HGNC Symbol;Acc:HGNC:26909]	8	38974164	38988662	p11.22	1
ENSG00000135821	18519.8	0.538	0.091	5.887	3.92964e-09	7.763e-07	up	GLUL	glutamate-ammonia ligase [Source:HGNC Symbol;Acc:HGNC:4341]	1	182381704	182392206	q25.3	-1
ENSG00000112096	68443.2	0.584	0.1	5.823	5.7938e-09	1.063e-06	up	SOD2	superoxide dismutase 2 [Source:HGNC Symbol;Acc:HGNC:11180]	6	159669057	159745186	q25.3	-1
ENSG00000143387	5139.77	0.55	0.095	5.768	8.00836e-09	1.402e-06	up	CTSK	cathepsin K [Source:HGNC Symbol;Acc:HGNC:2536]	1	150796208	150808323	q21.3	-1
ENSG00000100600	3216.78	0.802	0.144	5.564	2.63147e-08	4.137e-06	up	LGMN	legumain [Source:HGNC Symbol;Acc:HGNC:9472]	14	92703807	92748702	q32.12	-1
ENSG00000159023	1633.97	0.44	0.082	5.361	8.2942e-08	1.162e-05	up	EPB41	erythrocyte membrane protein band 4.1 [Source:HGNC Symbol;Acc:HGNC:3377]	1	28887091	29120046	p35.3	1
ENSG00000185567	269.295	0.949	0.183	5.182	2.19544e-07	2.773e-05	up	AHNAK2	AHNAK nucleoprotein 2 [Source:HGNC Symbol;Acc:HGNC:20125]	14	104937244	104978357	q32.33	-1
ENSG00000160593	1733.14	0.709	0.138	5.14	2.74774e-07	3.414e-05	up	JAML	junction adhesion molecule like [Source:HGNC Symbol;Acc:HGNC:19084]	11	118193740	118225094	q23.3	-1
ENSG00000110002	1570.97	0.566	0.112	5.047	4.48079e-07	5.311e-05	up	VWA5A	von Willebrand factor A domain containing 5A [Source:HGNC Symbol;Acc:HGNC:6658]	11	124115362	124147721	q24.2	1
ENSG00000165092	10006.1	0.358	0.071	5.048	4.45459e-07	5.311e-05	up	ALDH1A1	aldehyde dehydrogenase 1 family member A1 [Source:HGNC Symbol;Acc:HGNC:402]	9	72900662	73080442	q21.13	-1
ENSG00000088854	1289.43	0.53	0.105	5.039	4.66956e-07	5.451e-05	up	C20orf194	chromosome 20 open reading frame 194 [Source:HGNC Symbol;Acc:HGNC:17721]	20	3249305	3407625	p13	-1
ENSG00000135838	9713.55	0.284	0.057	5	5.74286e-07	6.272e-05	up	NPL	N-acetylneuraminate pyruvate lyase [Source:HGNC Symbol;Acc:HGNC:16781]	1	182789293	182830384	q25.3	1
ENSG00000115594	640.536	0.632	0.127	4.959	7.08648e-07	7.479e-05	up	IL1R1	interleukin 1 receptor type 1 [Source:HGNC Symbol;Acc:HGNC:5993]	2	102064544	102179874	q11.2	1
ENSG00000176788	1857.46	0.537	0.109	4.924	8.49635e-07	8.727e-05	up	BASP1	brain abundant membrane attached signal protein 1 [Source:HGNC Symbol;Acc:HGNC:957]	5	17065598	17276843	p15.1	1
ENSG00000085063	11146.9	0.329	0.067	4.907	9.23518e-07	9.122e-05	up	CD59	CD59 molecule (CD59 blood group) [Source:HGNC Symbol;Acc:HGNC:1689]	11	33703010	33736491	p13	-1
ENSG00000109861	12168.5	0.411	0.084	4.897	9.73076e-07	9.489e-05	up	CTSC	cathepsin C [Source:HGNC Symbol;Acc:HGNC:2528]	11	88293592	88337787	q14.2	-1
ENSG00000141458	4146.48	0.487	0.1	4.879	1.06445e-06	0.0001012	up	NPC1	NPC intracellular cholesterol transporter 1 [Source:HGNC Symbol;Acc:HGNC:7897]	18	23506184	23586898	q11.2	-1
ENSG00000135709	331.828	0.819	0.169	4.847	1.25294e-06	0.0001177	up	KIAA0513	KIAA0513 [Source:HGNC Symbol;Acc:HGNC:29058]	16	85027751	85094230	q24.1	1
ENSG00000099194	25778.9	0.541	0.113	4.767	1.86798e-06	0.0001673	up	SCD	stearoyl-CoA desaturase [Source:HGNC Symbol;Acc:HGNC:10571]	10	100347124	100364834	q24.31	1
ENSG00000149483	2775.12	0.662	0.14	4.727	2.28367e-06	0.0001955	up	TMEM138	transmembrane protein 138 [Source:HGNC Symbol;Acc:HGNC:26944]	11	61362001	61369509	q12.2	1
ENSG00000111144	18349	0.271	0.058	4.655	3.23495e-06	0.0002596	up	LTA4H	leukotriene A4 hydrolase [Source:HGNC Symbol;Acc:HGNC:6710]	12	96000828	96043520	q23.1	-1
ENSG00000143507	486.732	0.672	0.145	4.626	3.72575e-06	0.0002959	up	DUSP10	dual specificity phosphatase 10 [Source:HGNC Symbol;Acc:HGNC:3065]	1	221701424	221742176	q41	-1
ENSG00000011198	837.082	0.533	0.116	4.603	4.17418e-06	0.0003281	up	ABHD5	abhydrolase domain containing 5 [Source:HGNC Symbol;Acc:HGNC:21396]	3	43690108	43734371	p21.33	1
ENSG00000130066	16554	0.494	0.107	4.6	4.21673e-06	0.0003281	up	SAT1	spermidine/spermine N1-acetyltransferase 1 [Source:HGNC Symbol;Acc:HGNC:10540]	X	23783173	23786226	p22.11	1
ENSG00000118508	1177.96	0.451	0.098	4.589	4.45552e-06	0.0003433	up	RAB32	RAB32, member RAS oncogene family [Source:HGNC Symbol;Acc:HGNC:9772]	6	146543693	146554965	q24.3	1
ENSG00000072121	2886.9	0.523	0.116	4.525	6.04816e-06	0.0004438	up	ZFYVE26	zinc finger FYVE-type containing 26 [Source:HGNC Symbol;Acc:HGNC:20761]	14	67727374	67816590	q24.1	-1
ENSG00000117115	521.031	0.995	0.221	4.496	6.93924e-06	0.000495	up	PADI2	peptidyl arginine deiminase 2 [Source:HGNC Symbol;Acc:HGNC:18341]	1	17066761	17119435	p36.13	-1
ENSG00000120457	154.54	1.389	0.31	4.479	7.49894e-06	0.0005158	up	KCNJ5	potassium voltage-gated channel subfamily J member 5 [Source:HGNC Symbol;Acc:HGNC:6266]	11	128891356	128921035	q24.3	1
ENSG00000057757	618.388	0.512	0.115	4.444	8.83455e-06	0.000597	up	PITHD1	PITH domain containing 1 [Source:HGNC Symbol;Acc:HGNC:25022]	1	23778405	23788232	p36.11	1
ENSG00000162144	411.987	1.205	0.273	4.408	1.04232e-05	0.0006922	up	CYB561A3	cytochrome b561 family member A3 [Source:HGNC Symbol;Acc:HGNC:23014]	11	61348745	61362299	q12.2	-1
ENSG00000109323	2440.02	0.331	0.075	4.403	1.06763e-05	0.000703	up	MANBA	mannosidase beta [Source:HGNC Symbol;Acc:HGNC:6831]	4	102630770	102760994	q24	-1
ENSG00000242498	732.646	0.472	0.109	4.324	1.53118e-05	0.000959	up	ARPIN	actin related protein 2/3 complex inhibitor [Source:HGNC Symbol;Acc:HGNC:28782]	15	89895006	89912956	q26.1	-1
ENSG00000010219	394.445	0.692	0.163	4.24	2.24e-05	0.001338	up	DYRK4	dual specificity tyrosine phosphorylation regulated kinase 4 [Source:HGNC Symbol;Acc:HGNC:3095]	12	4562204	4615302	p13.32	1
ENSG00000165959	471.903	0.592	0.14	4.225	2.38802e-05	0.001415	up	CLMN	calmin [Source:HGNC Symbol;Acc:HGNC:19972]	14	95181940	95319906	q32.13	-1
ENSG00000150938	2280.11	0.603	0.143	4.209	2.56758e-05	0.00151	up	CRIM1	cysteine rich transmembrane BMP regulator 1 [Source:HGNC Symbol;Acc:HGNC:2359]	2	36355926	36551135	p22.2	1
ENSG00000188060	373.534	0.73	0.174	4.196	2.71929e-05	0.001575	up	RAB42	RAB42, member RAS oncogene family [Source:HGNC Symbol;Acc:HGNC:28702]	1	28592200	28595443	p35.3	1
ENSG00000105612	846.83	0.766	0.183	4.181	2.90578e-05	0.001658	up	DNASE2	deoxyribonuclease 2, lysosomal [Source:HGNC Symbol;Acc:HGNC:2960]	19	12875211	12881468	p13.13	-1
ENSG00000109099	625.64	0.631	0.152	4.147	3.36263e-05	0.001806	up	PMP22	peripheral myelin protein 22 [Source:HGNC Symbol;Acc:HGNC:9118]	17	15229777	15265357	p12	-1
ENSG00000100099	419.294	0.589	0.143	4.135	3.55639e-05	0.00189	up	HPS4	HPS4, biogenesis of lysosomal organelles complex 3 subunit 2 [Source:HGNC Symbol;Acc:HGNC:15844]	22	26443423	26483837	q12.1	-1
ENSG00000186283	740.381	0.654	0.159	4.109	3.98157e-05	0.00208	up	TOR3A	torsin family 3 member A [Source:HGNC Symbol;Acc:HGNC:11997]	1	179081377	179098023	q25.2	1
ENSG00000100523	1572.7	0.456	0.111	4.104	4.06165e-05	0.0021	up	DDHD1	DDHD domain containing 1 [Source:HGNC Symbol;Acc:HGNC:19714]	14	53036745	53153282	q22.1	-1
ENSG00000049246	999.934	0.425	0.104	4.088	4.35168e-05	0.002218	up	PER3	period circadian regulator 3 [Source:HGNC Symbol;Acc:HGNC:8847]	1	7784320	7845177	p36.23	1
ENSG00000113552	1830.02	0.443	0.109	4.078	4.53808e-05	0.002285	up	GNPDA1	glucosamine-6-phosphate deaminase 1 [Source:HGNC Symbol;Acc:HGNC:4417]	5	141991749	142013041	q31.3	-1
ENSG00000073060	241.936	1.144	0.281	4.07	4.7108e-05	0.002357	up	SCARB1	scavenger receptor class B member 1 [Source:HGNC Symbol;Acc:HGNC:1664]	12	124776856	124882668	q24.31	-1
ENSG00000071242	388.696	0.612	0.151	4.042	5.30404e-05	0.00257	up	RPS6KA2	ribosomal protein S6 kinase A2 [Source:HGNC Symbol;Acc:HGNC:10431]	6	166409364	166906451	q27	-1
ENSG00000156675	1273.56	0.394	0.098	4.022	5.76326e-05	0.002741	up	RAB11FIP1	RAB11 family interacting protein 1 [Source:HGNC Symbol;Acc:HGNC:30265]	8	37858618	37899467	p11.23	-1
ENSG00000090382	88979.4	0.349	0.087	4.005	6.20275e-05	0.002879	up	LYZ	lysozyme [Source:HGNC Symbol;Acc:HGNC:6740]	12	69348341	69354234	q15	1
ENSG00000112303	448.549	0.593	0.15	3.947	7.91726e-05	0.003446	up	VNN2	vanin 2 [Source:HGNC Symbol;Acc:HGNC:12706]	6	132743870	132763459	q23.2	-1
ENSG00000170915	864.101	0.443	0.115	3.867	0.000110345	0.004522	up	PAQR8	progestin and adipoQ receptor family member 8 [Source:HGNC Symbol;Acc:HGNC:15708]	6	52361421	52407777	p12.2	1
ENSG00000197043	666.332	0.822	0.213	3.863	0.000111823	0.004534	up	ANXA6	annexin A6 [Source:HGNC Symbol;Acc:HGNC:544]	5	151100712	151157882	q33.1	-1
ENSG00000114770	985.461	0.44	0.114	3.858	0.000114505	0.004595	up	ABCC5	ATP binding cassette subfamily C member 5 [Source:HGNC Symbol;Acc:HGNC:56]	3	183919934	184018015	q27.1	-1
ENSG00000147872	2665.45	0.478	0.124	3.856	0.00011514	0.004596	up	PLIN2	perilipin 2 [Source:HGNC Symbol;Acc:HGNC:248]	9	19108375	19149290	p22.1	-1
ENSG00000169429	24625.6	0.736	0.193	3.821	0.000132855	0.00505	up	CXCL8	C-X-C motif chemokine ligand 8 [Source:HGNC Symbol;Acc:HGNC:6025]	4	73740506	73743716	q13.3	1
ENSG00000051108	1934.59	0.331	0.087	3.82	0.000133381	0.00505	up	HERPUD1	homocysteine inducible ER protein with ubiquitin like domain 1 [Source:HGNC Symbol;Acc:HGNC:13744]	16	56932048	56944863	q13	1
ENSG00000163131	96133.2	0.195	0.051	3.819	0.000133977	0.00505	up	CTSS	cathepsin S [Source:HGNC Symbol;Acc:HGNC:2545]	1	150730196	150765957	q21.3	-1
ENSG00000075651	1784.33	0.41	0.108	3.811	0.000138128	0.005116	up	PLD1	phospholipase D1 [Source:HGNC Symbol;Acc:HGNC:9067]	3	171600405	171810950	q26.31	-1
ENSG00000243335	926.831	0.426	0.112	3.796	0.000146861	0.005341	up	KCTD7	potassium channel tetramerization domain containing 7 [Source:HGNC Symbol;Acc:HGNC:21957]	7	66628767	66649067	q11.21	1
ENSG00000102393	5096.68	0.321	0.085	3.784	0.000154359	0.005557	up	GLA	galactosidase alpha [Source:HGNC Symbol;Acc:HGNC:4296]	X	101397803	101407925	q22.1	-1
ENSG00000198203	1324.83	0.449	0.119	3.779	0.000157661	0.005616	up	SULT1C2	sulfotransferase family 1C member 2 [Source:HGNC Symbol;Acc:HGNC:11456]	2	108288639	108309915	q12.3	1
ENSG00000229771	400.405	0.733	0.195	3.757	0.0001723	0.005992	up			20	40696499	40698616	q12	-1
ENSG00000072274	160145	0.313	0.083	3.755	0.000173444	0.005992	up	TFRC	transferrin receptor [Source:HGNC Symbol;Acc:HGNC:11763]	3	196027183	196082189	q29	-1
ENSG00000156931	2545.85	0.349	0.093	3.751	0.000176192	0.00606	up	VPS8	VPS8, CORVET complex subunit [Source:HGNC Symbol;Acc:HGNC:29122]	3	184812143	185052614	q27.2	1
ENSG00000175538	681.276	0.483	0.129	3.744	0.000180884	0.006193	up	KCNE3	potassium voltage-gated channel subfamily E regulatory subunit 3 [Source:HGNC Symbol;Acc:HGNC:6243]	11	74454841	74467729	q13.4	-1
ENSG00000185215	921.407	0.867	0.232	3.738	0.00018548	0.006323	up	TNFAIP2	TNF alpha induced protein 2 [Source:HGNC Symbol;Acc:HGNC:11895]	14	103123442	103137439	q32.32	1
ENSG00000163235	656.526	0.7	0.188	3.722	0.00019801	0.006661	up	TGFA	transforming growth factor alpha [Source:HGNC Symbol;Acc:HGNC:11765]	2	70447280	70554193	p13.3	-1
ENSG00000206503	5871.49	0.613	0.165	3.715	0.00020312	0.006728	up	HLA-A	major histocompatibility complex, class I, A [Source:HGNC Symbol;Acc:HGNC:4931]	6	29941260	29945884	p22.1	1
ENSG00000260314	61324.2	0.229	0.062	3.717	0.000201497	0.006728	up	MRC1	mannose receptor C-type 1 [Source:HGNC Symbol;Acc:HGNC:7228]	10	17809344	17911170	p12.33	1
ENSG00000150054	241.68	0.851	0.229	3.711	0.000206436	0.006748	up	MPP7	membrane palmitoylated protein 7 [Source:HGNC Symbol;Acc:HGNC:26542]	10	28050993	28334486	p12.1	-1
ENSG00000112137	203.666	0.825	0.222	3.711	0.000206712	0.006748	up	PHACTR1	phosphatase and actin regulator 1 [Source:HGNC Symbol;Acc:HGNC:20990]	6	12716805	13290484	p24.1	1
ENSG00000130830	2649.49	0.356	0.096	3.712	0.000205365	0.006748	up	MPP1	membrane palmitoylated protein 1 [Source:HGNC Symbol;Acc:HGNC:7219]	X	154778684	154821007	q28	-1
ENSG00000166347	663.806	0.546	0.147	3.703	0.000212721	0.006857	up	CYB5A	cytochrome b5 type A [Source:HGNC Symbol;Acc:HGNC:2570]	18	74250847	74292016	q22.3	-1
ENSG00000137393	1677.35	0.375	0.101	3.699	0.000216197	0.00694	up	RNF144B	ring finger protein 144B [Source:HGNC Symbol;Acc:HGNC:21578]	6	18387350	18468874	p22.3	1
ENSG00000122254	456.771	0.662	0.181	3.67	0.000242698	0.007601	up	HS3ST2	heparan sulfate-glucosamine 3-sulfotransferase 2 [Source:HGNC Symbol;Acc:HGNC:5195]	16	22814177	22916338	p12.2	1
ENSG00000071967	1578.26	0.384	0.105	3.657	0.000255044	0.007891	up	CYBRD1	cytochrome b reductase 1 [Source:HGNC Symbol;Acc:HGNC:20797]	2	171522247	171558133	q31.1	1
ENSG00000179593	164.814	1.113	0.305	3.651	0.000261334	0.008021	up	ALOX15B	arachidonate 15-lipoxygenase, type B [Source:HGNC Symbol;Acc:HGNC:434]	17	8039017	8049134	p13.1	1
ENSG00000112299	839.184	0.505	0.138	3.646	0.000266454	0.008114	up	VNN1	vanin 1 [Source:HGNC Symbol;Acc:HGNC:12705]	6	132681590	132714049	q23.2	-1
ENSG00000105928	1917.37	0.359	0.099	3.639	0.000273749	0.008238	up	GSDME	gasdermin E [Source:HGNC Symbol;Acc:HGNC:2810]	7	24698351	24758113	p15.3	-1
ENSG00000112367	2400.93	0.298	0.082	3.64	0.000273039	0.008238	up	FIG4	FIG4 phosphoinositide 5-phosphatase [Source:HGNC Symbol;Acc:HGNC:16873]	6	109691312	109825428	q21	1
ENSG00000177000	304.791	0.644	0.178	3.616	0.000298741	0.008718	up	MTHFR	methylenetetrahydrofolate reductase [Source:HGNC Symbol;Acc:HGNC:7436]	1	11785723	11806920	p36.22	-1
ENSG00000203710	724.178	0.501	0.139	3.615	0.000300549	0.008737	up	CR1	complement C3b/C4b receptor 1 (Knops blood group) [Source:HGNC Symbol;Acc:HGNC:2334]	1	207496147	207641765	q32.2	1
ENSG00000125633	2582.85	0.289	0.08	3.612	0.000303904	0.008802	up	CCDC93	coiled-coil domain containing 93 [Source:HGNC Symbol;Acc:HGNC:25611]	2	117915478	118014133	q14.1	-1
ENSG00000013583	862.447	0.404	0.112	3.61	0.000306496	0.008844	up	HEBP1	heme binding protein 1 [Source:HGNC Symbol;Acc:HGNC:17176]	12	12974864	13000273	p13.1	-1
ENSG00000141540	236.474	0.801	0.222	3.603	0.000314061	0.008995	up	TTYH2	tweety family member 2 [Source:HGNC Symbol;Acc:HGNC:13877]	17	74213514	74262020	q25.1	1
ENSG00000093072	3233.66	0.475	0.132	3.593	0.000326497	0.009214	up	ADA2	adenosine deaminase 2 [Source:HGNC Symbol;Acc:HGNC:1839]	22	17178790	17221989	q11.1	-1
ENSG00000197046	603.359	0.622	0.173	3.592	0.000328676	0.009241	up	SIGLEC15	sialic acid binding Ig like lectin 15 [Source:HGNC Symbol;Acc:HGNC:27596]	18	45825512	45844080	q12.3	1
ENSG00000100100	146.887	0.956	0.267	3.576	0.000348915	0.009542	up	PIK3IP1	phosphoinositide-3-kinase interacting protein 1 [Source:HGNC Symbol;Acc:HGNC:24942]	22	31281593	31292534	q12.2	-1
ENSG00000165406	378.921	0.569	0.159	3.575	0.000349748	0.009542	up	MARCH8	membrane associated ring-CH-type finger 8 [Source:HGNC Symbol;Acc:HGNC:23356]	10	45454585	45594906	q11.22	-1
ENSG00000245060	716.804	0.495	0.139	3.574	0.000351741	0.009542	up	LINC00847	long intergenic non-protein coding RNA 847 [Source:HGNC Symbol;Acc:HGNC:45050]	5	180830957	180835726	q35.3	1
ENSG00000198848	1350.5	0.779	0.219	3.559	0.00037173	0.009978	up	CES1	carboxylesterase 1 [Source:HGNC Symbol;Acc:HGNC:1863]	16	55802851	55833337	q12.2	-1
ENSG00000176049	1212.85	0.408	0.115	3.556	0.00037681	0.01008	up	JAKMIP2	janus kinase and microtubule interacting protein 2 [Source:HGNC Symbol;Acc:HGNC:29067]	5	147585439	147782848	q32	-1
ENSG00000145730	4172.15	0.306	0.086	3.551	0.000383385	0.01022	up	PAM	peptidylglycine alpha-amidating monooxygenase [Source:HGNC Symbol;Acc:HGNC:8596]	5	102753981	103031105	q21.1	1
ENSG00000113269	5663.89	0.245	0.069	3.547	0.000389314	0.01034	up	RNF130	ring finger protein 130 [Source:HGNC Symbol;Acc:HGNC:18280]	5	179911651	180072118	q35.3	-1
ENSG00000158470	2861.82	0.315	0.089	3.545	0.000392126	0.01038	up	B4GALT5	beta-1,4-galactosyltransferase 5 [Source:HGNC Symbol;Acc:HGNC:928]	20	49632945	49713878	q13.13	-1
ENSG00000099290	995.036	0.351	0.1	3.509	0.000450557	0.01164	up	WASHC2A	WASH complex subunit 2A [Source:HGNC Symbol;Acc:HGNC:23416]	10	50067888	50133506	q11.23	1
ENSG00000153786	1152.82	0.447	0.128	3.5	0.000466021	0.01189	up	ZDHHC7	zinc finger DHHC-type containing 7 [Source:HGNC Symbol;Acc:HGNC:18459]	16	84974181	85011535	q24.1	-1
ENSG00000198814	1693.84	0.41	0.118	3.463	0.000534462	0.01291	up	GK	glycerol kinase [Source:HGNC Symbol;Acc:HGNC:4289]	X	30653359	30731456	p21.2	1
ENSG00000178104	4290.81	0.359	0.104	3.453	0.000554366	0.01327	up	PDE4DIP	phosphodiesterase 4D interacting protein [Source:HGNC Symbol;Acc:HGNC:15580]	1	148808181	149048286	q21.2	1
ENSG00000143376	1750.25	0.308	0.089	3.448	0.000565729	0.01341	up	SNX27	sorting nexin family member 27 [Source:HGNC Symbol;Acc:HGNC:20073]	1	151612006	151699091	q21.3	1
ENSG00000151012	8669.28	0.645	0.188	3.441	0.000578904	0.01364	up	SLC7A11	solute carrier family 7 member 11 [Source:HGNC Symbol;Acc:HGNC:11059]	4	138164097	138242349	q28.3	-1
ENSG00000084070	1112.74	0.465	0.136	3.434	0.000594779	0.01397	up	SMAP2	small ArfGAP2 [Source:HGNC Symbol;Acc:HGNC:25082]	1	40344850	40423326	p34.2	1
ENSG00000181019	1603.69	0.345	0.101	3.426	0.000613396	0.01423	up	NQO1	NAD(P)H quinone dehydrogenase 1 [Source:HGNC Symbol;Acc:HGNC:2874]	16	69706996	69726951	q22.1	-1
ENSG00000072042	3297.58	0.253	0.074	3.426	0.000612106	0.01423	up	RDH11	retinol dehydrogenase 11 (all-trans/9-cis/11-cis) [Source:HGNC Symbol;Acc:HGNC:17964]	14	67676801	67695814	q24.1	-1
ENSG00000006007	1742.45	0.324	0.095	3.423	0.000619708	0.01434	up	GDE1	glycerophosphodiester phosphodiesterase 1 [Source:HGNC Symbol;Acc:HGNC:29644]	16	19501689	19522145	p12.3	-1
ENSG00000070540	614.209	0.671	0.196	3.417	0.000633484	0.01448	up	WIPI1	WD repeat domain, phosphoinositide interacting 1 [Source:HGNC Symbol;Acc:HGNC:25471]	17	68420948	68457513	q24.2	-1
ENSG00000070759	181.397	0.692	0.204	3.39	0.000697842	0.01546	up	TESK2	testis-specific kinase 2 [Source:HGNC Symbol;Acc:HGNC:11732]	1	45343883	45491166	p34.1	-1
ENSG00000033627	3073.38	0.288	0.085	3.389	0.000702241	0.01546	up	ATP6V0A1	ATPase H+ transporting V0 subunit a1 [Source:HGNC Symbol;Acc:HGNC:865]	17	42458844	42522611	q21.2	1
ENSG00000157538	1952.55	0.285	0.084	3.391	0.000695605	0.01546	up	VPS26C	VPS26 endosomal protein sorting factor C [Source:HGNC Symbol;Acc:HGNC:3044]	21	37223420	37267919	q22.13	-1
ENSG00000131355	393.947	0.608	0.18	3.38	0.000725267	0.01587	up	ADGRE3	adhesion G protein-coupled receptor E3 [Source:HGNC Symbol;Acc:HGNC:23647]	19	14619117	14690027	p13.12	-1
ENSG00000189067	18005.3	0.235	0.07	3.359	0.00078227	0.01683	up	LITAF	lipopolysaccharide induced TNF factor [Source:HGNC Symbol;Acc:HGNC:16841]	16	11547722	11636381	p13.13	-1
ENSG00000170266	1722.3	0.498	0.148	3.357	0.000788079	0.01691	up	GLB1	galactosidase beta 1 [Source:HGNC Symbol;Acc:HGNC:4298]	3	32996608	33097230	p22.3	-1
ENSG00000164048	1418.77	0.402	0.12	3.343	0.000828864	0.01756	up	ZNF589	zinc finger protein 589 [Source:HGNC Symbol;Acc:HGNC:16747]	3	48241100	48299253	p21.31	1
ENSG00000151117	215.671	0.741	0.223	3.331	0.000864215	0.01824	up	TMEM86A	transmembrane protein 86A [Source:HGNC Symbol;Acc:HGNC:26890]	11	18693122	18704785	p15.1	1
ENSG00000172322	2834	0.286	0.086	3.33	0.000868411	0.01828	up	CLEC12A	C-type lectin domain family 12 member A [Source:HGNC Symbol;Acc:HGNC:31713]	12	9951316	9995694	p13.31	1
ENSG00000079459	1976.31	0.411	0.123	3.328	0.000874078	0.01835	up	FDFT1	farnesyl-diphosphate farnesyltransferase 1 [Source:HGNC Symbol;Acc:HGNC:3629]	8	11795573	11839309	p23.1	1
ENSG00000159348	788.856	0.528	0.159	3.324	0.000886043	0.0185	up	CYB5R1	cytochrome b5 reductase 1 [Source:HGNC Symbol;Acc:HGNC:13397]	1	202961869	202967280	q32.1	-1
ENSG00000215861	406.857	0.957	0.293	3.262	0.00110581	0.02217	up			1	149197992	149321732	q21.2	-1
ENSG00000174600	708.256	0.682	0.21	3.256	0.00113056	0.02217	up	CMKLR1	chemerin chemokine-like receptor 1 [Source:HGNC Symbol;Acc:HGNC:2121]	12	108288044	108339341	q23.3	-1
ENSG00000266835	523.248	0.519	0.159	3.258	0.00112248	0.02217	up	GAPLINC	gastric adenocarcinoma associated, positive CD44 regulator, long intergenic non-coding RNA [Source:HGNC Symbol;Acc:HGNC:51308]	18	3466250	3478978	p11.31	1
ENSG00000134250	4686.49	0.294	0.09	3.257	0.00112522	0.02217	up	NOTCH2	notch 2 [Source:HGNC Symbol;Acc:HGNC:7882]	1	119911553	120069626	p12	-1
ENSG00000136710	972.165	0.351	0.108	3.251	0.00115016	0.02226	up	CCDC115	coiled-coil domain containing 115 [Source:HGNC Symbol;Acc:HGNC:28178]	2	130338241	130342349	q21.1	-1
ENSG00000103365	1010.79	0.486	0.15	3.236	0.00121018	0.02296	up	GGA2	golgi associated, gamma adaptin ear containing, ARF binding protein 2 [Source:HGNC Symbol;Acc:HGNC:16064]	16	23463542	23521995	p12.2	-1
ENSG00000174282	635.279	0.411	0.127	3.233	0.00122623	0.0231	up	ZBTB4	zinc finger and BTB domain containing 4 [Source:HGNC Symbol;Acc:HGNC:23847]	17	7459366	7484263	p13.1	-1
ENSG00000213614	1177.15	0.466	0.145	3.216	0.00130075	0.02386	up	HEXA	hexosaminidase subunit alpha [Source:HGNC Symbol;Acc:HGNC:4878]	15	72340919	72376476	q23	-1
ENSG00000112079	1654.16	0.289	0.09	3.215	0.00130548	0.02387	up	STK38	serine/threonine kinase 38 [Source:HGNC Symbol;Acc:HGNC:17847]	6	36493892	36547470	p21.31	-1
ENSG00000172578	5152.73	0.258	0.081	3.189	0.00142995	0.02531	up	KLHL6	kelch like family member 6 [Source:HGNC Symbol;Acc:HGNC:18653]	3	183487531	183555689	q27.1	-1
ENSG00000186074	809.09	0.446	0.14	3.183	0.00145901	0.02572	up	CD300LF	CD300 molecule like family member f [Source:HGNC Symbol;Acc:HGNC:29883]	17	74694311	74712978	q25.1	-1
ENSG00000197321	410.955	0.505	0.159	3.181	0.00146571	0.02578	up	SVIL	supervillin [Source:HGNC Symbol;Acc:HGNC:11480]	10	29457338	29736781	p11.23	-1
ENSG00000100336	202.718	0.778	0.245	3.178	0.00148098	0.02593	up	APOL4	apolipoprotein L4 [Source:HGNC Symbol;Acc:HGNC:14867]	22	36189124	36204840	q12.3	-1
ENSG00000186635	734.132	0.587	0.185	3.177	0.00149049	0.02602	up	ARAP1	ArfGAP with RhoGAP domain, ankyrin repeat and PH domain 1 [Source:HGNC Symbol;Acc:HGNC:16925]	11	72685069	72793599	q13.4	-1
ENSG00000138764	1008	0.521	0.164	3.173	0.0015075	0.02616	up	CCNG2	cyclin G2 [Source:HGNC Symbol;Acc:HGNC:1593]	4	77157151	77433388	q21.1	1
ENSG00000100504	1864.02	0.29	0.091	3.172	0.00151527	0.02623	up	PYGL	glycogen phosphorylase L [Source:HGNC Symbol;Acc:HGNC:9725]	14	50857891	50944736	q22.1	-1
ENSG00000081041	754.508	0.745	0.235	3.166	0.0015464	0.02664	up	CXCL2	C-X-C motif chemokine ligand 2 [Source:HGNC Symbol;Acc:HGNC:4603]	4	74097035	74099293	q13.3	-1
ENSG00000187554	185.06	0.736	0.233	3.165	0.00154909	0.02664	up	TLR5	toll like receptor 5 [Source:HGNC Symbol;Acc:HGNC:11851]	1	223109406	223143282	q41	-1
ENSG00000197894	2451.93	0.248	0.078	3.162	0.0015683	0.02685	up	ADH5	alcohol dehydrogenase 5 (class III), chi polypeptide [Source:HGNC Symbol;Acc:HGNC:253]	4	99070978	99088801	q23	-1
ENSG00000100292	711.038	0.731	0.231	3.161	0.00157325	0.02686	up	HMOX1	heme oxygenase 1 [Source:HGNC Symbol;Acc:HGNC:5013]	22	35380361	35394214	q12.3	1
ENSG00000143819	227.3	0.928	0.294	3.159	0.00158578	0.02697	up	EPHX1	epoxide hydrolase 1 [Source:HGNC Symbol;Acc:HGNC:3401]	1	225810092	225845563	q42.12	1
ENSG00000142494	453.309	0.524	0.166	3.148	0.00164586	0.02756	up	SLC47A1	solute carrier family 47 member 1 [Source:HGNC Symbol;Acc:HGNC:25588]	17	19495385	19579034	p11.2	1
ENSG00000123595	790.182	0.368	0.117	3.148	0.00164261	0.02756	up	RAB9A	RAB9A, member RAS oncogene family [Source:HGNC Symbol;Acc:HGNC:9792]	X	13689125	13710506	p22.2	1
ENSG00000095383	386.977	0.708	0.225	3.146	0.00165565	0.02761	up	TBC1D2	TBC1 domain family member 2 [Source:HGNC Symbol;Acc:HGNC:18026]	9	98198999	98255721	q22.33	-1
ENSG00000137752	2705.77	0.253	0.08	3.146	0.00165281	0.02761	up	CASP1	caspase 1 [Source:HGNC Symbol;Acc:HGNC:1499]	11	105025443	105035250	q22.3	-1
ENSG00000120885	2818.81	0.441	0.14	3.144	0.00166386	0.02763	up	CLU	clusterin [Source:HGNC Symbol;Acc:HGNC:2095]	8	27596917	27615031	p21.1	-1
ENSG00000138413	15421.5	0.224	0.071	3.145	0.00166048	0.02763	up	IDH1	isocitrate dehydrogenase (NADP(+)) 1, cytosolic [Source:HGNC Symbol;Acc:HGNC:5382]	2	208236227	208266074	q34	-1
ENSG00000101474	1086.24	0.5	0.159	3.139	0.00169272	0.02804	up	APMAP	adipocyte plasma membrane associated protein [Source:HGNC Symbol;Acc:HGNC:13238]	20	24962925	24992979	p11.21	-1
ENSG00000159346	3063.51	0.328	0.105	3.118	0.00181904	0.02957	up	ADIPOR1	adiponectin receptor 1 [Source:HGNC Symbol;Acc:HGNC:24040]	1	202940823	202958572	q32.1	-1
ENSG00000197355	139.662	0.876	0.283	3.098	0.00194843	0.03134	up	UAP1L1	UDP-N-acetylglucosamine pyrophosphorylase 1 like 1 [Source:HGNC Symbol;Acc:HGNC:28082]	9	137077501	137084539	q34.3	1
ENSG00000079308	1454.99	0.391	0.126	3.096	0.00196252	0.0315	up	TNS1	tensin 1 [Source:HGNC Symbol;Acc:HGNC:11973]	2	217799588	218010421	q35	-1
ENSG00000158683	262.746	0.676	0.219	3.093	0.0019794	0.0317	up	PKD1L1	polycystin 1 like 1, transient receptor potential channel interacting [Source:HGNC Symbol;Acc:HGNC:18053]	7	47774652	47948491	p12.3	-1
ENSG00000069812	179.048	0.98	0.318	3.078	0.00208606	0.03314	up	HES2	hes family bHLH transcription factor 2 [Source:HGNC Symbol;Acc:HGNC:16005]	1	6412418	6424670	p36.31	-1
ENSG00000121060	2588.72	0.338	0.11	3.07	0.00213915	0.03384	up	TRIM25	tripartite motif containing 25 [Source:HGNC Symbol;Acc:HGNC:12932]	17	56887909	56914038	q22	-1
ENSG00000100344	139.532	0.874	0.285	3.069	0.00214994	0.03394	up	PNPLA3	patatin like phospholipase domain containing 3 [Source:HGNC Symbol;Acc:HGNC:18590]	22	43923739	43964488	q13.31	1
ENSG00000167552	3178.55	0.385	0.126	3.067	0.00216099	0.03405	up	TUBA1A	tubulin alpha 1a [Source:HGNC Symbol;Acc:HGNC:20766]	12	49184796	49189324	q13.12	-1
ENSG00000170581	3501.65	0.399	0.131	3.048	0.0023034	0.03578	up	STAT2	signal transducer and activator of transcription 2 [Source:HGNC Symbol;Acc:HGNC:11363]	12	56341597	56360155	q13.3	-1
ENSG00000197646	568.182	0.481	0.158	3.043	0.0023455	0.03625	up	PDCD1LG2	programmed cell death 1 ligand 2 [Source:HGNC Symbol;Acc:HGNC:18731]	9	5510570	5571254	p24.1	1
ENSG00000054983	2220.14	0.274	0.09	3.03	0.00244688	0.03755	up	GALC	galactosylceramidase [Source:HGNC Symbol;Acc:HGNC:4115]	14	87837820	87993665	q31.3	-1
ENSG00000141506	749.995	0.534	0.177	3.02	0.00252985	0.03822	up	PIK3R5	phosphoinositide-3-kinase regulatory subunit 5 [Source:HGNC Symbol;Acc:HGNC:30035]	17	8878911	8965712	p13.1	-1
ENSG00000149485	3234.96	0.373	0.124	3.017	0.00255339	0.0385	up	FADS1	fatty acid desaturase 1 [Source:HGNC Symbol;Acc:HGNC:3574]	11	61799625	61829318	q12.2	-1
ENSG00000105875	228.495	0.64	0.213	3.013	0.00258849	0.03887	up	WDR91	WD repeat domain 91 [Source:HGNC Symbol;Acc:HGNC:24997]	7	135183839	135211534	q33	-1
ENSG00000169087	361.112	0.435	0.145	3.008	0.00263004	0.03912	up	HSPBAP1	HSPB1 associated protein 1 [Source:HGNC Symbol;Acc:HGNC:16389]	3	122740003	122793824	q21.1	-1
ENSG00000179918	1212.51	0.519	0.173	3.006	0.00265046	0.03927	up	SEPHS2	selenophosphate synthetase 2 [Source:HGNC Symbol;Acc:HGNC:19686]	16	30443631	30446181	p11.2	-1
ENSG00000156113	1325.55	0.272	0.091	3.005	0.00265823	0.03931	up	KCNMA1	potassium calcium-activated channel subfamily M alpha 1 [Source:HGNC Symbol;Acc:HGNC:6284]	10	76869601	77638369	q22.3	-1
ENSG00000204070	822.883	0.44	0.146	3.004	0.00266502	0.03933	up	SYS1	SYS1, golgi trafficking protein [Source:HGNC Symbol;Acc:HGNC:16162]	20	45361937	45376798	q13.12	1
ENSG00000085662	1685.86	0.48	0.16	3.003	0.0026777	0.03944	up	AKR1B1	aldo-keto reductase family 1 member B [Source:HGNC Symbol;Acc:HGNC:381]	7	134442350	134459284	q33	-1
ENSG00000160285	198.613	0.876	0.294	2.985	0.00283896	0.04088	up	LSS	lanosterol synthase [Source:HGNC Symbol;Acc:HGNC:6708]	21	46188141	46228824	q22.3	-1
ENSG00000139508	1363.1	0.34	0.114	2.981	0.00287605	0.04114	up	SLC46A3	solute carrier family 46 member 3 [Source:HGNC Symbol;Acc:HGNC:27501]	13	28700064	28718970	q12.3	-1
ENSG00000135912	791.835	0.477	0.16	2.974	0.00293842	0.04192	up	TTLL4	tubulin tyrosine ligase like 4 [Source:HGNC Symbol;Acc:HGNC:28976]	2	218710845	218755416	q35	1
ENSG00000204525	3135.53	0.58	0.195	2.969	0.0029912	0.04244	up	HLA-C	major histocompatibility complex, class I, C [Source:HGNC Symbol;Acc:HGNC:4933]	6	31268749	31272130	p21.33	-1
ENSG00000203446	806.529	0.369	0.125	2.966	0.00301656	0.04272	up			7	40538127	40546928	p14.1	-1
ENSG00000119537	919.364	0.286	0.097	2.948	0.00319912	0.0447	up	KDSR	3-ketodihydrosphingosine reductase [Source:HGNC Symbol;Acc:HGNC:4021]	18	63327726	63367510	q21.33	-1
ENSG00000163931	474.306	0.816	0.277	2.944	0.00324386	0.04479	up	TKT	transketolase [Source:HGNC Symbol;Acc:HGNC:11834]	3	53224707	53256052	p21.1	-1
ENSG00000162174	152.762	0.733	0.249	2.945	0.00323257	0.04479	up	ASRGL1	asparaginase like 1 [Source:HGNC Symbol;Acc:HGNC:16448]	11	62337448	62393412	q12.3	1
ENSG00000142657	4139.4	0.558	0.19	2.935	0.00333324	0.04539	up	PGD	phosphogluconate dehydrogenase [Source:HGNC Symbol;Acc:HGNC:8891]	1	10398592	10420144	p36.22	1
ENSG00000117139	940.851	0.317	0.108	2.925	0.00344639	0.04642	up	KDM5B	lysine demethylase 5B [Source:HGNC Symbol;Acc:HGNC:18039]	1	202724491	202809470	q32.1	-1
ENSG00000158270	1580.98	0.387	0.132	2.921	0.00348535	0.04678	up	COLEC12	collectin subfamily member 12 [Source:HGNC Symbol;Acc:HGNC:16016]	18	316740	500722	p11.32	-1
ENSG00000172661	1013.05	0.288	0.099	2.919	0.00350799	0.047	up	WASHC2C	WASH complex subunit 2C [Source:HGNC Symbol;Acc:HGNC:23414]	10	45727200	45792961	q11.22	1
ENSG00000108669	2034.21	0.298	0.102	2.912	0.00358993	0.04802	up	CYTH1	cytohesin 1 [Source:HGNC Symbol;Acc:HGNC:9501]	17	78674048	78782297	q25.3	-1
