# Supplementary material for: The antibiotic bedaquiline activates host macrophage innate immune resistance to bacterial infection
Source: eLife. 2020 May 4;9:e55692. doi: 10.7554/eLife.55692 (PMC7200153; doi:10.7554/eLife.55692)
Supplement: Figure 1—source data 2. — FDR < 0.05. [file elife-55692-fig1-data2.xlsx]

## Sheet: Feuil1
ensembl_gene_id	baseMean	log2FoldChange	lfcSE	stat	pvalue	padj	direction	hgnc_symbol	description	chromosome_name	start_position	end_position	band	strand
ENSG00000100234	7607.5	-1.015	0.088	-11.487	1.53604e-30	1.183e-26	down	TIMP3	TIMP metallopeptidase inhibitor 3 [Source:HGNC Symbol;Acc:HGNC:11822]	22	32801701	32863043	q12.3	1
ENSG00000175445	40764.4	-0.897	0.081	-11.03	2.75125e-28	1.06e-24	down	LPL	lipoprotein lipase [Source:HGNC Symbol;Acc:HGNC:6677]	8	19901717	19967258	p21.3	1
ENSG00000117525	1215.45	-1.452	0.141	-10.322	5.63091e-25	1.446e-21	down	F3	coagulation factor III, tissue factor [Source:HGNC Symbol;Acc:HGNC:3541]	1	94529225	94541800	p21.3	-1
ENSG00000132688	565.766	-1.871	0.208	-8.988	2.52167e-19	3.885e-16	down	NES	nestin [Source:HGNC Symbol;Acc:HGNC:7756]	1	156668763	156677397	q23.1	-1
ENSG00000117228	4018.55	-0.853	0.099	-8.643	5.46346e-18	7.015e-15	down	GBP1	guanylate binding protein 1 [Source:HGNC Symbol;Acc:HGNC:4182]	1	89052319	89065360	p22.2	-1
ENSG00000110092	2268.97	-1.051	0.123	-8.522	1.57305e-17	1.731e-14	down	CCND1	cyclin D1 [Source:HGNC Symbol;Acc:HGNC:1582]	11	69641087	69654474	q13.3	1
ENSG00000133135	392.387	-1.501	0.198	-7.592	3.14923e-14	3.033e-11	down	RNF128	ring finger protein 128, E3 ubiquitin protein ligase [Source:HGNC Symbol;Acc:HGNC:21153]	X	106693794	106796993	q22.3	1
ENSG00000151704	2097.33	-0.767	0.102	-7.531	5.0216e-14	4.298e-11	down	KCNJ1	potassium voltage-gated channel subfamily J member 1 [Source:HGNC Symbol;Acc:HGNC:6255]	11	128836315	128867373	q24.3	-1
ENSG00000162772	6279.92	-0.772	0.108	-7.163	7.86709e-13	6.061e-10	down	ATF3	activating transcription factor 3 [Source:HGNC Symbol;Acc:HGNC:785]	1	212565334	212620777	q32.3	1
ENSG00000136689	8591.49	-0.896	0.125	-7.142	9.16709e-13	6.42e-10	down	IL1RN	interleukin 1 receptor antagonist [Source:HGNC Symbol;Acc:HGNC:6000]	2	113107214	113134016	q14.1	1
ENSG00000169299	3701.14	-0.546	0.078	-6.961	3.37395e-12	1.999e-09	down	PGM2	phosphoglucomutase 2 [Source:HGNC Symbol;Acc:HGNC:8906]	4	37826633	37862937	p14	1
ENSG00000102755	3085.28	-0.689	0.1	-6.908	4.92142e-12	2.708e-09	down	FLT1	fms related tyrosine kinase 1 [Source:HGNC Symbol;Acc:HGNC:3763]	13	28300344	28495145	q12.3	-1
ENSG00000115956	28959.3	-0.536	0.079	-6.825	8.76703e-12	4.503e-09	down	PLEK	pleckstrin [Source:HGNC Symbol;Acc:HGNC:9070]	2	68365173	68397453	p14	1
ENSG00000102804	2944.81	-0.698	0.108	-6.483	8.98706e-11	3.297e-08	down	TSC22D1	TSC22 domain family member 1 [Source:HGNC Symbol;Acc:HGNC:16826]	13	44432143	44577147	q14.11	-1
ENSG00000154229	1561.66	-0.559	0.087	-6.443	1.16964e-10	4.096e-08	down	PRKCA	protein kinase C alpha [Source:HGNC Symbol;Acc:HGNC:9393]	17	66302636	66810743	q24.2	1
ENSG00000139318	1880.93	-0.627	0.099	-6.349	2.16064e-10	7.237e-08	down	DUSP6	dual specificity phosphatase 6 [Source:HGNC Symbol;Acc:HGNC:3072]	12	89347232	89353271	q21.33	-1
ENSG00000141655	1050.37	-0.696	0.11	-6.322	2.58498e-10	7.966e-08	down	TNFRSF11A	TNF receptor superfamily member 11a [Source:HGNC Symbol;Acc:HGNC:11908]	18	62325287	62391292	q21.33	1
ENSG00000146072	1394.15	-0.665	0.106	-6.277	3.45402e-10	1.023e-07	down	TNFRSF21	TNF receptor superfamily member 21 [Source:HGNC Symbol;Acc:HGNC:13469]	6	47231532	47309905	p12.3	-1
ENSG00000139278	5696.34	-0.481	0.077	-6.246	4.20075e-10	1.199e-07	down	GLIPR1	GLI pathogenesis related 1 [Source:HGNC Symbol;Acc:HGNC:17001]	12	75480680	75503853	q21.2	1
ENSG00000139289	1836.51	-0.795	0.129	-6.182	6.33302e-10	1.742e-07	down	PHLDA1	pleckstrin homology like domain family A member 1 [Source:HGNC Symbol;Acc:HGNC:8933]	12	76025447	76033932	q21.2	-1
ENSG00000144959	13126.3	-0.507	0.083	-6.119	9.4135e-10	2.501e-07	down	NCEH1	neutral cholesterol ester hydrolase 1 [Source:HGNC Symbol;Acc:HGNC:29260]	3	172630249	172711218	q26.31	-1
ENSG00000076716	6832.07	-0.545	0.09	-6.079	1.21294e-09	3.115e-07	down	GPC4	glypican 4 [Source:HGNC Symbol;Acc:HGNC:4452]	X	133300103	133415490	q26.2	-1
ENSG00000148848	781.976	-0.987	0.163	-6.055	1.40054e-09	3.481e-07	down	ADAM12	ADAM metallopeptidase domain 12 [Source:HGNC Symbol;Acc:HGNC:190]	10	126012381	126388455	q26.2	-1
ENSG00000240859	1058.18	-0.76	0.126	-6.022	1.72732e-09	4.159e-07	down			7	149597	155465	p22.3	1
ENSG00000102760	5026.62	-0.512	0.086	-5.974	2.31467e-09	5.245e-07	down	RGCC	regulator of cell cycle [Source:HGNC Symbol;Acc:HGNC:20369]	13	41457559	41470882	q14.11	1
ENSG00000143153	6705.16	-0.458	0.077	-5.948	2.71119e-09	5.645e-07	down	ATP1B1	ATPase Na+/K+ transporting subunit beta 1 [Source:HGNC Symbol;Acc:HGNC:804]	1	169105697	169132722	q24.2	1
ENSG00000136158	774.101	-0.686	0.117	-5.872	4.30455e-09	8.291e-07	down	SPRY2	sprouty RTK signaling antagonist 2 [Source:HGNC Symbol;Acc:HGNC:11270]	13	80335976	80340951	q31.1	-1
ENSG00000138185	1760.25	-0.536	0.091	-5.862	4.56495e-09	8.578e-07	down	ENTPD1	ectonucleoside triphosphate diphosphohydrolase 1 [Source:HGNC Symbol;Acc:HGNC:3363]	10	95711779	95869695	q24.1	1
ENSG00000134668	336.042	-1.08	0.186	-5.814	6.0958e-09	1.092e-06	down	SPOCD1	SPOC domain containing 1 [Source:HGNC Symbol;Acc:HGNC:26338]	1	31790422	31816051	p35.2	-1
ENSG00000169436	355.944	-1.185	0.206	-5.747	9.07744e-09	1.554e-06	down	COL22A1	collagen type XXII alpha 1 chain [Source:HGNC Symbol;Acc:HGNC:22989]	8	138588235	138914006	q24.3	-1
ENSG00000175054	2390.05	-0.58	0.102	-5.694	1.24053e-08	2.078e-06	down	ATR	ATR serine/threonine kinase [Source:HGNC Symbol;Acc:HGNC:882]	3	142449235	142578826	q23	-1
ENSG00000165732	3868.91	-0.585	0.103	-5.671	1.42241e-08	2.332e-06	down	DDX21	DExD-box helicase 21 [Source:HGNC Symbol;Acc:HGNC:2744]	10	68956128	68985073	q22.1	1
ENSG00000050405	1946.32	-0.604	0.108	-5.613	1.98679e-08	3.189e-06	down	LIMA1	LIM domain and actin binding 1 [Source:HGNC Symbol;Acc:HGNC:24636]	12	50175788	50283546	q13.12	-1
ENSG00000138760	20675.8	-0.42	0.076	-5.531	3.18645e-08	4.91e-06	down	SCARB2	scavenger receptor class B member 2 [Source:HGNC Symbol;Acc:HGNC:1665]	4	76158733	76234536	q21.1	-1
ENSG00000122877	3807.34	-0.494	0.091	-5.427	5.72854e-08	8.653e-06	down	EGR2	early growth response 2 [Source:HGNC Symbol;Acc:HGNC:3239]	10	62811996	62919900	q21.3	-1
ENSG00000136167	115301	-0.346	0.064	-5.42	5.94563e-08	8.809e-06	down	LCP1	lymphocyte cytosolic protein 1 [Source:HGNC Symbol;Acc:HGNC:6528]	13	46125920	46211871	q14.13	-1
ENSG00000128567	622.868	-0.767	0.142	-5.405	6.4657e-08	9.224e-06	down	PODXL	podocalyxin like [Source:HGNC Symbol;Acc:HGNC:9171]	7	131500262	131558217	q32.3	-1
ENSG00000118971	1098.87	-0.692	0.128	-5.406	6.43101e-08	9.224e-06	down	CCND2	cyclin D2 [Source:HGNC Symbol;Acc:HGNC:1583]	12	4273772	4305350	p13.32	1
ENSG00000242474	725.707	-0.729	0.137	-5.324	1.01393e-07	1.395e-05	down			7	135853	149466	p22.3	-1
ENSG00000167460	15214.9	-0.383	0.072	-5.297	1.17919e-07	1.594e-05	down	TPM4	tropomyosin 4 [Source:HGNC Symbol;Acc:HGNC:12013]	19	16067021	16103005	p13.12	1
ENSG00000155090	814.397	-0.727	0.138	-5.261	1.43411e-07	1.905e-05	down	KLF10	Kruppel like factor 10 [Source:HGNC Symbol;Acc:HGNC:11810]	8	102648779	102655902	q22.3	-1
ENSG00000031003	5500.53	-0.551	0.105	-5.255	1.48122e-07	1.934e-05	down	FAM13B	family with sequence similarity 13 member B [Source:HGNC Symbol;Acc:HGNC:1335]	5	137937960	138051961	q31.2	-1
ENSG00000022267	288.249	-1.216	0.233	-5.221	1.77607e-07	2.28e-05	down	FHL1	four and a half LIM domains 1 [Source:HGNC Symbol;Acc:HGNC:3702]	X	136146702	136211359	q26.3	1
ENSG00000144381	8982.5	-0.435	0.085	-5.108	3.25167e-07	3.976e-05	down	HSPD1	heat shock protein family D (Hsp60) member 1 [Source:HGNC Symbol;Acc:HGNC:5261]	2	197486581	197516737	q33.1	-1
ENSG00000149635	459.781	-1.176	0.234	-5.034	4.79793e-07	5.517e-05	down	OCSTAMP	osteoclast stimulatory transmembrane protein [Source:HGNC Symbol;Acc:HGNC:16116]	20	46540946	46550574	q13.12	-1
ENSG00000111300	1383.12	-0.541	0.107	-5.03	4.91527e-07	5.569e-05	down	NAA25	N(alpha)-acetyltransferase 25, NatB auxiliary subunit [Source:HGNC Symbol;Acc:HGNC:25783]	12	112026689	112109022	q24.13	-1
ENSG00000119138	1736.31	-0.601	0.12	-5.009	5.4851e-07	6.124e-05	down	KLF9	Kruppel like factor 9 [Source:HGNC Symbol;Acc:HGNC:1123]	9	70384597	70414624	q21.12	-1
ENSG00000111817	2521.34	-0.4	0.08	-4.998	5.78051e-07	6.272e-05	down	DSE	dermatan sulfate epimerase [Source:HGNC Symbol;Acc:HGNC:21144]	6	116254173	116444860	q22.1	1
ENSG00000033867	2270.48	-0.626	0.126	-4.974	6.56829e-07	7.028e-05	down	SLC4A7	solute carrier family 4 member 7 [Source:HGNC Symbol;Acc:HGNC:11033]	3	27372721	27484420	p24.1	-1
ENSG00000113368	711.165	-0.647	0.131	-4.933	8.11217e-07	8.445e-05	down	LMNB1	lamin B1 [Source:HGNC Symbol;Acc:HGNC:6637]	5	126776623	126837020	q23.2	1
ENSG00000120802	2991.11	-0.657	0.134	-4.921	8.62346e-07	8.741e-05	down	TMPO	thymopoietin [Source:HGNC Symbol;Acc:HGNC:11875]	12	98515512	98550379	q23.1	1
ENSG00000154127	2976.19	-0.419	0.085	-4.918	8.7489e-07	8.753e-05	down	UBASH3B	ubiquitin associated and SH3 domain containing B [Source:HGNC Symbol;Acc:HGNC:29884]	11	122655675	122814473	q24.1	1
ENSG00000142875	10371.2	-0.556	0.114	-4.894	9.88434e-07	9.519e-05	down	PRKACB	protein kinase cAMP-activated catalytic subunit beta [Source:HGNC Symbol;Acc:HGNC:9381]	1	84078062	84238498	p31.1	1
ENSG00000135932	8500.21	-0.405	0.084	-4.834	1.3351e-06	0.0001239	down	CAB39	calcium binding protein 39 [Source:HGNC Symbol;Acc:HGNC:20292]	2	230712845	230821075	q37.1	1
ENSG00000123700	353.958	-0.724	0.151	-4.811	1.50459e-06	0.000138	down	KCNJ2	potassium voltage-gated channel subfamily J member 2 [Source:HGNC Symbol;Acc:HGNC:6263]	17	70168673	70180048	q24.3	1
ENSG00000166068	5574.2	-0.514	0.108	-4.773	1.81126e-06	0.0001642	down	SPRED1	sprouty related EVH1 domain containing 1 [Source:HGNC Symbol;Acc:HGNC:20249]	15	38252326	38357249	q14	1
ENSG00000166923	1157.29	-1.112	0.234	-4.761	1.92362e-06	0.0001684	down	GREM1	gremlin 1, DAN family BMP antagonist [Source:HGNC Symbol;Acc:HGNC:2001]	15	32717974	32745107	q13.3	1
ENSG00000132334	3545.73	-0.358	0.075	-4.761	1.92367e-06	0.0001684	down	PTPRE	protein tyrosine phosphatase, receptor type E [Source:HGNC Symbol;Acc:HGNC:9669]	10	127907061	128085855	q26.2	1
ENSG00000132646	1992.56	-0.542	0.115	-4.731	2.23665e-06	0.0001936	down	PCNA	proliferating cell nuclear antigen [Source:HGNC Symbol;Acc:HGNC:8729]	20	5114953	5126626	p12.3	-1
ENSG00000134333	14710.2	-0.32	0.068	-4.721	2.34823e-06	0.0001988	down	LDHA	lactate dehydrogenase A [Source:HGNC Symbol;Acc:HGNC:6535]	11	18394388	18408425	p15.1	1
ENSG00000182957	2477.01	-0.408	0.087	-4.689	2.74924e-06	0.0002302	down	SPATA13	spermatogenesis associated 13 [Source:HGNC Symbol;Acc:HGNC:23222]	13	23979805	24307074	q12.12	1
ENSG00000117054	4067.54	-0.553	0.118	-4.686	2.79048e-06	0.0002312	down	ACADM	acyl-CoA dehydrogenase medium chain [Source:HGNC Symbol;Acc:HGNC:89]	1	75724347	75787575	p31.1	1
ENSG00000048052	710.84	-0.622	0.133	-4.67	3.01543e-06	0.0002471	down	HDAC9	histone deacetylase 9 [Source:HGNC Symbol;Acc:HGNC:14065]	7	18086949	19002416	p21.1	1
ENSG00000138670	3471.06	-0.438	0.094	-4.66	3.15718e-06	0.000256	down	RASGEF1B	RasGEF domain family member 1B [Source:HGNC Symbol;Acc:HGNC:24881]	4	81426393	82044244	q21.22	-1
ENSG00000164109	423.795	-0.816	0.178	-4.584	4.55265e-06	0.0003439	down	MAD2L1	mitotic arrest deficient 2 like 1 [Source:HGNC Symbol;Acc:HGNC:6763]	4	120055608	120067074	q27	-1
ENSG00000135905	6155.9	-0.325	0.071	-4.585	4.53861e-06	0.0003439	down	DOCK10	dedicator of cytokinesis 10 [Source:HGNC Symbol;Acc:HGNC:23479]	2	224765090	225042445	q36.2	-1
ENSG00000174370	1594.73	-0.561	0.122	-4.581	4.62824e-06	0.0003462	down	C11orf45	chromosome 11 open reading frame 45 [Source:HGNC Symbol;Acc:HGNC:28584]	11	128899565	128906035	q24.3	-1
ENSG00000102763	2177.74	-0.351	0.077	-4.566	4.98005e-06	0.0003689	down	VWA8	von Willebrand factor A domain containing 8 [Source:HGNC Symbol;Acc:HGNC:29071]	13	41566837	41961120	q14.11	-1
ENSG00000101868	421.892	-0.675	0.15	-4.514	6.36704e-06	0.0004584	down	POLA1	DNA polymerase alpha 1, catalytic subunit [Source:HGNC Symbol;Acc:HGNC:9173]	X	24693919	24996986	p22.11	1
ENSG00000128050	1886.98	-0.607	0.135	-4.514	6.36215e-06	0.0004584	down	PAICS	phosphoribosylaminoimidazole carboxylase and phosphoribosylaminoimidazolesuccinocarboxamide synthase [Source:HGNC Symbol;Acc:HGNC:8587]	4	56435741	56464579	q12	1
ENSG00000179841	212.501	-1.145	0.255	-4.49	7.11778e-06	0.0005031	down	AKAP5	A-kinase anchoring protein 5 [Source:HGNC Symbol;Acc:HGNC:375]	14	64465499	64474503	q23.3	1
ENSG00000198554	532.946	-0.735	0.164	-4.487	7.21363e-06	0.0005052	down	WDHD1	WD repeat and HMG-box DNA binding protein 1 [Source:HGNC Symbol;Acc:HGNC:23170]	14	54938950	55027105	q22.3	-1
ENSG00000119508	1570.06	-0.689	0.154	-4.483	7.35274e-06	0.0005103	down	NR4A3	nuclear receptor subfamily 4 group A member 3 [Source:HGNC Symbol;Acc:HGNC:7982]	9	99821855	99866891	q31.1	1
ENSG00000184009	16486.4	-0.398	0.09	-4.448	8.67931e-06	0.0005917	down	ACTG1	actin gamma 1 [Source:HGNC Symbol;Acc:HGNC:144]	17	81509971	81523847	q25.3	-1
ENSG00000169439	16497.9	-0.429	0.097	-4.427	9.53818e-06	0.000639	down	SDC2	syndecan 2 [Source:HGNC Symbol;Acc:HGNC:10659]	8	96493351	96611780	q22.1	1
ENSG00000171848	1408.64	-0.649	0.148	-4.37	1.24144e-05	0.0008105	down	RRM2	ribonucleotide reductase regulatory subunit M2 [Source:HGNC Symbol;Acc:HGNC:10452]	2	10120698	10131419	p25.1	1
ENSG00000011566	1802.77	-0.534	0.123	-4.353	1.34379e-05	0.00087	down	MAP4K3	mitogen-activated protein kinase kinase kinase kinase 3 [Source:HGNC Symbol;Acc:HGNC:6865]	2	39249266	39437312	p22.1	-1
ENSG00000137819	447.466	-0.623	0.143	-4.348	1.37486e-05	0.0008827	down	PAQR5	progestin and adipoQ receptor family member 5 [Source:HGNC Symbol;Acc:HGNC:29645]	15	69298947	69407780	q23	1
ENSG00000058804	1420.95	-0.518	0.12	-4.328	1.50384e-05	0.0009496	down	NDC1	NDC1 transmembrane nucleoporin [Source:HGNC Symbol;Acc:HGNC:25525]	1	53765460	53838860	p32.3	-1
ENSG00000133961	11411.9	-0.324	0.075	-4.329	1.49556e-05	0.0009496	down	NUMB	NUMB, endocytic adaptor protein [Source:HGNC Symbol;Acc:HGNC:8060]	14	73275107	73458617	q24.3	-1
ENSG00000138119	17294.7	-0.279	0.065	-4.322	1.54703e-05	0.0009612	down	MYOF	myoferlin [Source:HGNC Symbol;Acc:HGNC:3656]	10	93306429	93482317	q23.33	-1
ENSG00000138035	1882.39	-0.514	0.119	-4.307	1.65728e-05	0.001021	down	PNPT1	polyribonucleotide nucleotidyltransferase 1 [Source:HGNC Symbol;Acc:HGNC:23166]	2	55634265	55693910	p16.1	-1
ENSG00000147650	2439.57	-0.374	0.087	-4.296	1.74132e-05	0.001065	down	LRP12	LDL receptor related protein 12 [Source:HGNC Symbol;Acc:HGNC:31708]	8	104489231	104589024	q22.3	-1
ENSG00000253729	3566.65	-0.339	0.08	-4.263	2.01464e-05	0.001222	down	PRKDC	protein kinase, DNA-activated, catalytic polypeptide [Source:HGNC Symbol;Acc:HGNC:9413]	8	47773108	47960183	q11.21	-1
ENSG00000171208	613.668	-0.575	0.135	-4.253	2.10853e-05	0.001269	down	NETO2	neuropilin and tolloid like 2 [Source:HGNC Symbol;Acc:HGNC:14644]	16	47077703	47143997	q12.1	-1
ENSG00000198826	815.204	-0.59	0.141	-4.2	2.67453e-05	0.001561	down	ARHGAP11A	Rho GTPase activating protein 11A [Source:HGNC Symbol;Acc:HGNC:15783]	15	32615144	32639949	q13.3	1
ENSG00000255717	622.539	-0.51	0.122	-4.191	2.7719e-05	0.001594	down	SNHG1	small nucleolar RNA host gene 1 [Source:HGNC Symbol;Acc:HGNC:32688]	11	62851988	62855914	q12.3	-1
ENSG00000164164	5164.62	-0.417	0.1	-4.174	2.99532e-05	0.001697	down	OTUD4	OTU deubiquitinase 4 [Source:HGNC Symbol;Acc:HGNC:24949]	4	145110838	145180161	q31.21	-1
ENSG00000119285	912.531	-0.417	0.1	-4.171	3.02792e-05	0.0017	down	HEATR1	HEAT repeat containing 1 [Source:HGNC Symbol;Acc:HGNC:25517]	1	236549005	236604504	q43	-1
ENSG00000182481	3476.19	-0.281	0.067	-4.17	3.04477e-05	0.0017	down	KPNA2	karyopherin subunit alpha 2 [Source:HGNC Symbol;Acc:HGNC:6395]	17	68035519	68046842	q24.2	1
ENSG00000136997	191.337	-0.901	0.217	-4.147	3.37398e-05	0.001806	down	MYC	MYC proto-oncogene, bHLH transcription factor [Source:HGNC Symbol;Acc:HGNC:7553]	8	127735434	127741434	q24.21	1
ENSG00000119514	1414.21	-0.549	0.132	-4.147	3.37517e-05	0.001806	down	GALNT12	polypeptide N-acetylgalactosaminyltransferase 12 [Source:HGNC Symbol;Acc:HGNC:19877]	9	98807699	98850081	q22.33	1
ENSG00000136824	1560.32	-0.486	0.117	-4.151	3.31635e-05	0.001806	down	SMC2	structural maintenance of chromosomes 2 [Source:HGNC Symbol;Acc:HGNC:14011]	9	104094260	104141417	q31.1	1
ENSG00000113649	1427.23	-0.463	0.111	-4.152	3.2898e-05	0.001806	down	TCERG1	transcription elongation regulator 1 [Source:HGNC Symbol;Acc:HGNC:15630]	5	146447311	146511961	q32	1
ENSG00000151247	1735.31	-0.439	0.106	-4.15	3.32973e-05	0.001806	down	EIF4E	eukaryotic translation initiation factor 4E [Source:HGNC Symbol;Acc:HGNC:3287]	4	98871684	98930637	q23	-1
ENSG00000115738	3805.73	-0.466	0.113	-4.128	3.65652e-05	0.001929	down	ID2	inhibitor of DNA binding 2 [Source:HGNC Symbol;Acc:HGNC:5361]	2	8678845	8684453	p25.1	1
ENSG00000138182	743.823	-0.736	0.179	-4.108	3.99553e-05	0.00208	down	KIF20B	kinesin family member 20B [Source:HGNC Symbol;Acc:HGNC:7212]	10	89701610	89774939	q23.31	1
ENSG00000034677	2374.65	-0.434	0.106	-4.097	4.18378e-05	0.002149	down	RNF19A	ring finger protein 19A, RBR E3 ubiquitin protein ligase [Source:HGNC Symbol;Acc:HGNC:13432]	8	100257060	100336218	q22.2	-1
ENSG00000181915	3495.2	-0.49	0.12	-4.087	4.376e-05	0.002218	down	ADO	2-aminoethanethiol dioxygenase [Source:HGNC Symbol;Acc:HGNC:23506]	10	62804857	62808483	q21.3	1
ENSG00000152642	617.152	-0.581	0.143	-4.063	4.84414e-05	0.002377	down	GPD1L	glycerol-3-phosphate dehydrogenase 1 like [Source:HGNC Symbol;Acc:HGNC:28956]	3	32105689	32168713	p22.3	1
ENSG00000156802	1319.38	-0.511	0.126	-4.064	4.82529e-05	0.002377	down	ATAD2	ATPase family, AAA domain containing 2 [Source:HGNC Symbol;Acc:HGNC:30123]	8	123319850	123416350	q24.13	-1
ENSG00000168904	3185.06	-0.373	0.092	-4.066	4.78822e-05	0.002377	down	LRRC28	leucine rich repeat containing 28 [Source:HGNC Symbol;Acc:HGNC:28355]	15	99251362	99390729	q26.3	1
ENSG00000151835	1259.12	-0.624	0.154	-4.061	4.88271e-05	0.002381	down	SACS	sacsin molecular chaperone [Source:HGNC Symbol;Acc:HGNC:10519]	13	23328826	23433740	q12.12	-1
ENSG00000184445	928.382	-0.507	0.126	-4.033	5.49943e-05	0.002648	down	KNTC1	kinetochore associated 1 [Source:HGNC Symbol;Acc:HGNC:17255]	12	122527246	122626396	q24.31	1
ENSG00000179833	2590.45	-0.379	0.094	-4.024	5.71547e-05	0.002735	down	SERTAD2	SERTA domain containing 2 [Source:HGNC Symbol;Acc:HGNC:30784]	2	64631621	64751005	p14	-1
ENSG00000039560	2196.5	-0.445	0.111	-4.018	5.88143e-05	0.00278	down	RAI14	retinoic acid induced 14 [Source:HGNC Symbol;Acc:HGNC:14873]	5	34656237	34832627	p13.2	1
ENSG00000124207	2809.2	-0.45	0.112	-4.014	5.97406e-05	0.002806	down	CSE1L	chromosome segregation 1 like [Source:HGNC Symbol;Acc:HGNC:2431]	20	49046246	49096960	q13.13	1
ENSG00000123219	263.515	-0.808	0.202	-4.008	6.11138e-05	0.002853	down	CENPK	centromere protein K [Source:HGNC Symbol;Acc:HGNC:29479]	5	65517766	65563171	q12.3	-1
ENSG00000157483	3682.9	-0.309	0.077	-4.002	6.2715e-05	0.002893	down	MYO1E	myosin IE [Source:HGNC Symbol;Acc:HGNC:7599]	15	59132434	59372900	q22.2	-1
ENSG00000270069	263.794	-0.942	0.236	-3.998	6.3955e-05	0.002933	down	MIR222HG	MIR222 host gene [Source:HGNC Symbol;Acc:HGNC:49555]	X	45745211	45770274	p11.3	-1
ENSG00000012048	783.906	-0.562	0.141	-3.993	6.5249e-05	0.002974	down	BRCA1	BRCA1, DNA repair associated [Source:HGNC Symbol;Acc:HGNC:1100]	17	43044295	43170245	q21.31	-1
ENSG00000122641	5202.7	-0.843	0.212	-3.98	6.88968e-05	0.003122	down	INHBA	inhibin beta A subunit [Source:HGNC Symbol;Acc:HGNC:6066]	7	41667168	41705834	p14.1	-1
ENSG00000143889	1662.78	-0.356	0.09	-3.964	7.36355e-05	0.003317	down	HNRNPLL	heterogeneous nuclear ribonucleoprotein L like [Source:HGNC Symbol;Acc:HGNC:25127]	2	38561978	38603586	p22.1	-1
ENSG00000127951	2031.26	-0.496	0.125	-3.959	7.53752e-05	0.00332	down	FGL2	fibrinogen like 2 [Source:HGNC Symbol;Acc:HGNC:3696]	7	77193371	77199848	q11.23	-1
ENSG00000154359	779.281	-0.478	0.121	-3.961	7.46319e-05	0.00332	down	LONRF1	LON peptidase N-terminal domain and ring finger 1 [Source:HGNC Symbol;Acc:HGNC:26302]	8	12721894	12756073	p23.1	-1
ENSG00000067900	10520.3	-0.428	0.108	-3.959	7.53836e-05	0.00332	down	ROCK1	Rho associated coiled-coil containing protein kinase 1 [Source:HGNC Symbol;Acc:HGNC:10251]	18	20946906	21111851	q11.1	-1
ENSG00000112081	3967.17	-0.322	0.081	-3.959	7.54055e-05	0.00332	down	SRSF3	serine and arginine rich splicing factor 3 [Source:HGNC Symbol;Acc:HGNC:10785]	6	36594353	36605600	p21.31	1
ENSG00000065150	2424.86	-0.372	0.094	-3.949	7.8642e-05	0.003442	down	IPO5	importin 5 [Source:HGNC Symbol;Acc:HGNC:6402]	13	97953658	98024297	q32.2	1
ENSG00000253123	188.201	-0.987	0.251	-3.931	8.44398e-05	0.003655	down			8	37326575	37331984	p11.23	-1
ENSG00000113532	685.317	-0.625	0.159	-3.926	8.63992e-05	0.003719	down	ST8SIA4	ST8 alpha-N-acetyl-neuraminide alpha-2,8-sialyltransferase 4 [Source:HGNC Symbol;Acc:HGNC:10871]	5	100806935	100903266	q21.1	-1
ENSG00000146731	5659.32	-0.336	0.086	-3.924	8.71296e-05	0.003729	down	CCT6A	chaperonin containing TCP1 subunit 6A [Source:HGNC Symbol;Acc:HGNC:1620]	7	56051630	56063989	p11.2	1
ENSG00000012963	1827.86	-0.346	0.089	-3.903	9.51449e-05	0.00405	down	UBR7	ubiquitin protein ligase E3 component n-recognin 7 (putative) [Source:HGNC Symbol;Acc:HGNC:20344]	14	93207056	93229215	q32.12	1
ENSG00000139618	784.975	-0.623	0.16	-3.899	9.67032e-05	0.004071	down	BRCA2	BRCA2, DNA repair associated [Source:HGNC Symbol;Acc:HGNC:1101]	13	32315474	32400266	q13.1	1
ENSG00000178202	541.235	-0.581	0.149	-3.9	9.63591e-05	0.004071	down	KDELC2	KDEL motif containing 2 [Source:HGNC Symbol;Acc:HGNC:28496]	11	108472105	108498432	q22.3	-1
ENSG00000170144	5746.03	-0.276	0.071	-3.883	0.000103338	0.004327	down	HNRNPA3	heterogeneous nuclear ribonucleoprotein A3 [Source:HGNC Symbol;Acc:HGNC:24941]	2	177212563	177223958	q31.2	1
ENSG00000119326	536.15	-0.618	0.159	-3.878	0.000105534	0.004386	down	CTNNAL1	catenin alpha like 1 [Source:HGNC Symbol;Acc:HGNC:2512]	9	108942569	109013529	q31.3	-1
ENSG00000131747	2569.79	-0.591	0.153	-3.876	0.000106278	0.004386	down	TOP2A	DNA topoisomerase II alpha [Source:HGNC Symbol;Acc:HGNC:11989]	17	40388516	40417950	q21.2	-1
ENSG00000138399	2262.36	-0.471	0.122	-3.875	0.000106472	0.004386	down	FASTKD1	FAST kinase domains 1 [Source:HGNC Symbol;Acc:HGNC:26150]	2	169529749	169573875	q31.1	-1
ENSG00000087253	4881.08	-0.394	0.102	-3.865	0.00011112	0.004529	down	LPCAT2	lysophosphatidylcholine acyltransferase 2 [Source:HGNC Symbol;Acc:HGNC:26032]	16	55508998	55586670	q12.2	1
ENSG00000139116	620.285	-0.549	0.142	-3.86	0.000113567	0.004581	down	KIF21A	kinesin family member 21A [Source:HGNC Symbol;Acc:HGNC:19349]	12	39293228	39443390	q12	-1
ENSG00000117899	2422.9	-0.33	0.086	-3.849	0.000118562	0.004708	down	MESD	mesoderm development LRP chaperone [Source:HGNC Symbol;Acc:HGNC:13520]	15	80946289	80989878	q25.1	-1
ENSG00000177189	6021.79	-0.389	0.101	-3.848	0.000119184	0.004709	down	RPS6KA3	ribosomal protein S6 kinase A3 [Source:HGNC Symbol;Acc:HGNC:10432]	X	20149911	20267519	p22.12	-1
ENSG00000166197	767.69	-0.511	0.133	-3.846	0.000120084	0.00472	down	NOLC1	nucleolar and coiled-body phosphoprotein 1 [Source:HGNC Symbol;Acc:HGNC:15608]	10	102152176	102163871	q24.32	1
ENSG00000001084	8781.09	-0.338	0.088	-3.842	0.000121988	0.004771	down	GCLC	glutamate-cysteine ligase catalytic subunit [Source:HGNC Symbol;Acc:HGNC:4311]	6	53497341	53616970	p12.1	-1
ENSG00000171241	695.719	-0.627	0.163	-3.838	0.000124121	0.004806	down	SHCBP1	SHC binding and spindle associated 1 [Source:HGNC Symbol;Acc:HGNC:29547]	16	46580554	46621626	q11.2	-1
ENSG00000136527	2923.16	-0.348	0.091	-3.838	0.000124138	0.004806	down	TRA2B	transformer 2 beta homolog [Source:HGNC Symbol;Acc:HGNC:10781]	3	185915906	185938136	q27.2	-1
ENSG00000170876	1581.37	-0.398	0.104	-3.834	0.000125842	0.004847	down	TMEM43	transmembrane protein 43 [Source:HGNC Symbol;Acc:HGNC:28472]	3	14124940	14143679	p25.1	1
ENSG00000065183	762.602	-0.478	0.125	-3.83	0.000128027	0.004907	down	WDR3	WD repeat domain 3 [Source:HGNC Symbol;Acc:HGNC:12755]	1	117929720	117966542	p12	1
ENSG00000091317	14251.8	-0.412	0.108	-3.816	0.00013568	0.00505	down	CMTM6	CKLF like MARVEL transmembrane domain containing 6 [Source:HGNC Symbol;Acc:HGNC:19177]	3	32481312	32503408	p22.3	-1
ENSG00000116062	1077.32	-0.408	0.107	-3.816	0.000135588	0.00505	down	MSH6	mutS homolog 6 [Source:HGNC Symbol;Acc:HGNC:7329]	2	47695530	47810101	p16.3	1
ENSG00000132341	5825.53	-0.303	0.079	-3.818	0.000134473	0.00505	down	RAN	RAN, member RAS oncogene family [Source:HGNC Symbol;Acc:HGNC:9846]	12	130871879	130877678	q24.33	1
ENSG00000198513	339.989	-0.626	0.165	-3.801	0.000144253	0.005317	down	ATL1	atlastin GTPase 1 [Source:HGNC Symbol;Acc:HGNC:11231]	14	50532509	50633068	q22.1	1
ENSG00000112029	236.628	-0.796	0.21	-3.796	0.000146985	0.005341	down	FBXO5	F-box protein 5 [Source:HGNC Symbol;Acc:HGNC:13584]	6	152970519	152983579	q25.2	-1
ENSG00000174125	2481.91	-0.428	0.113	-3.797	0.000146442	0.005341	down	TLR1	toll like receptor 1 [Source:HGNC Symbol;Acc:HGNC:11847]	4	38790677	38856817	p14	-1
ENSG00000164134	2751.48	-0.437	0.115	-3.794	0.000148399	0.005367	down	NAA15	N(alpha)-acetyltransferase 15, NatA auxiliary subunit [Source:HGNC Symbol;Acc:HGNC:30782]	4	139301455	139420033	q31.1	1
ENSG00000163964	586.828	-0.471	0.125	-3.777	0.000158415	0.005616	down	PIGX	phosphatidylinositol glycan anchor biosynthesis class X [Source:HGNC Symbol;Acc:HGNC:26046]	3	196639775	196736007	q29	1
ENSG00000155846	1390.99	-0.434	0.115	-3.778	0.000157858	0.005616	down	PPARGC1B	PPARG coactivator 1 beta [Source:HGNC Symbol;Acc:HGNC:30022]	5	149730298	149855022	q32	1
ENSG00000103342	4518.69	-0.288	0.076	-3.777	0.000158904	0.005616	down	GSPT1	G1 to S phase transition 1 [Source:HGNC Symbol;Acc:HGNC:4621]	16	11868128	11916082	p13.13	-1
ENSG00000115902	3303.04	-0.401	0.106	-3.769	0.000163977	0.005768	down	SLC1A4	solute carrier family 1 member 4 [Source:HGNC Symbol;Acc:HGNC:10942]	2	64988477	65023865	p14	1
ENSG00000170312	985.737	-0.702	0.186	-3.762	0.000168373	0.005896	down	CDK1	cyclin dependent kinase 1 [Source:HGNC Symbol;Acc:HGNC:1722]	10	60778331	60794852	q21.2	1
ENSG00000152413	548.254	-0.694	0.185	-3.755	0.000173151	0.005992	down	HOMER1	homer scaffolding protein 1 [Source:HGNC Symbol;Acc:HGNC:17512]	5	79372636	79514217	q14.1	-1
ENSG00000172115	7040.34	-0.446	0.119	-3.735	0.000187692	0.00637	down	CYCS	cytochrome c, somatic [Source:HGNC Symbol;Acc:HGNC:19986]	7	25120091	25125361	p15.3	-1
ENSG00000145386	659.125	-0.584	0.157	-3.726	0.000194651	0.006577	down	CCNA2	cyclin A2 [Source:HGNC Symbol;Acc:HGNC:1578]	4	121816444	121823933	q27	-1
ENSG00000173915	1366.63	-0.388	0.104	-3.716	0.000202689	0.006728	down	ATP5MD	ATP synthase membrane subunit DAPIT [Source:HGNC Symbol;Acc:HGNC:30889]	10	103389041	103396466	q24.33	-1
ENSG00000164024	1543.55	-0.367	0.099	-3.715	0.000203489	0.006728	down	METAP1	methionyl aminopeptidase 1 [Source:HGNC Symbol;Acc:HGNC:15789]	4	98995620	99062813	q23	1
ENSG00000189057	561.504	-0.79	0.213	-3.71	0.000207649	0.00675	down	FAM111B	family with sequence similarity 111 member B [Source:HGNC Symbol;Acc:HGNC:24200]	11	59107185	59127410	q12.1	1
ENSG00000145715	2630.78	-0.417	0.112	-3.706	0.000210822	0.006824	down	RASA1	RAS p21 protein activator 1 [Source:HGNC Symbol;Acc:HGNC:9871]	5	87267888	87391931	q14.3	1
ENSG00000166922	1083.87	-0.575	0.156	-3.696	0.000218941	0.006999	down	SCG5	secretogranin V [Source:HGNC Symbol;Acc:HGNC:10816]	15	32641676	32697098	q13.3	1
ENSG00000138778	826.866	-0.563	0.153	-3.682	0.000231139	0.007328	down	CENPE	centromere protein E [Source:HGNC Symbol;Acc:HGNC:1856]	4	103105806	103198409	q24	-1
ENSG00000183023	2574.99	-0.343	0.093	-3.682	0.000231002	0.007328	down	SLC8A1	solute carrier family 8 member A1 [Source:HGNC Symbol;Acc:HGNC:11068]	2	40097270	40611053	p22.1	-1
ENSG00000073711	1982.31	-0.488	0.133	-3.677	0.000235639	0.00744	down	PPP2R3A	protein phosphatase 2 regulatory subunit B''alpha [Source:HGNC Symbol;Acc:HGNC:9307]	3	135965673	136147891	q22.2	1
ENSG00000139132	4513.25	-0.382	0.104	-3.67	0.000242706	0.007601	down	FGD4	FYVE, RhoGEF and PH domain containing 4 [Source:HGNC Symbol;Acc:HGNC:19125]	12	32399529	32646050	p11.21	1
ENSG00000023228	5731.61	-0.242	0.066	-3.666	0.000246404	0.007685	down	NDUFS1	NADH:ubiquinone oxidoreductase core subunit S1 [Source:HGNC Symbol;Acc:HGNC:7707]	2	206114817	206159603	q33.3	-1
ENSG00000090104	3421.24	-0.451	0.123	-3.661	0.000251374	0.007809	down	RGS1	regulator of G protein signaling 1 [Source:HGNC Symbol;Acc:HGNC:9991]	1	192575727	192580031	q31.2	1
ENSG00000065809	2843.53	-0.385	0.105	-3.652	0.000259972	0.008011	down	FAM107B	family with sequence similarity 107 member B [Source:HGNC Symbol;Acc:HGNC:23726]	10	14518557	14774897	p13	-1
ENSG00000030066	1972.89	-0.338	0.093	-3.647	0.000265481	0.008114	down	NUP160	nucleoporin 160 [Source:HGNC Symbol;Acc:HGNC:18017]	11	47778087	47848555	p11.2	-1
ENSG00000178966	493.918	-0.558	0.153	-3.644	0.000268307	0.008138	down	RMI1	RecQ mediated genome instability 1 [Source:HGNC Symbol;Acc:HGNC:25764]	9	83980711	84004074	q21.32	1
ENSG00000170017	17350	-0.428	0.118	-3.637	0.000275423	0.008256	down	ALCAM	activated leukocyte cell adhesion molecule [Source:HGNC Symbol;Acc:HGNC:400]	3	105366909	105576900	q13.11	1
ENSG00000170027	9485.58	-0.29	0.08	-3.635	0.000277963	0.0083	down	YWHAG	tyrosine 3-monooxygenase/tryptophan 5-monooxygenase activation protein gamma [Source:HGNC Symbol;Acc:HGNC:12852]	7	76326794	76359031	q11.23	-1
ENSG00000134308	6290.3	-0.308	0.085	-3.631	0.000281808	0.008382	down	YWHAQ	tyrosine 3-monooxygenase/tryptophan 5-monooxygenase activation protein theta [Source:HGNC Symbol;Acc:HGNC:12854]	2	9583972	9631014	p25.1	-1
ENSG00000125944	2637.84	-0.327	0.09	-3.625	0.000289294	0.008572	down	HNRNPR	heterogeneous nuclear ribonucleoprotein R [Source:HGNC Symbol;Acc:HGNC:5047]	1	23303771	23344336	p36.12	-1
ENSG00000198056	239.275	-0.706	0.195	-3.62	0.000294212	0.008684	down	PRIM1	DNA primase subunit 1 [Source:HGNC Symbol;Acc:HGNC:9369]	12	56731596	56752373	q13.3	-1
ENSG00000165264	1192.52	-0.611	0.169	-3.618	0.000297151	0.008704	down	NDUFB6	NADH:ubiquinone oxidoreductase subunit B6 [Source:HGNC Symbol;Acc:HGNC:7701]	9	32552999	32573184	p21.1	-1
ENSG00000260101	449.971	-0.558	0.154	-3.618	0.000297035	0.008704	down			2	64522187	64524093	p14	-1
ENSG00000113569	887.274	-0.39	0.108	-3.604	0.000313929	0.008995	down	NUP155	nucleoporin 155 [Source:HGNC Symbol;Acc:HGNC:8063]	5	37288137	37371181	p13.2	-1
ENSG00000051341	410.645	-0.64	0.178	-3.6	0.00031875	0.009095	down	POLQ	DNA polymerase theta [Source:HGNC Symbol;Acc:HGNC:9186]	3	121431427	121546641	q13.33	-1
ENSG00000038427	527.387	-1.606	0.446	-3.598	0.000320132	0.009101	down	VCAN	versican [Source:HGNC Symbol;Acc:HGNC:2464]	5	83471465	83582303	q14.2	1
ENSG00000117593	1779.65	-0.415	0.115	-3.596	0.000323073	0.009151	down	DARS2	aspartyl-tRNA synthetase 2, mitochondrial [Source:HGNC Symbol;Acc:HGNC:25538]	1	173824503	173858546	q25.1	1
ENSG00000117594	2130.67	-0.461	0.129	-3.585	0.000336484	0.009373	down	HSD11B1	hydroxysteroid 11-beta dehydrogenase 1 [Source:HGNC Symbol;Acc:HGNC:5208]	1	209686178	209734950	q32.2	1
ENSG00000048828	5014.15	-0.372	0.104	-3.586	0.000335761	0.009373	down	FAM120A	family with sequence similarity 120A [Source:HGNC Symbol;Acc:HGNC:13247]	9	93451722	93566107	q22.31	1
ENSG00000068305	3798.61	-0.325	0.091	-3.585	0.000337018	0.009373	down	MEF2A	myocyte enhancer factor 2A [Source:HGNC Symbol;Acc:HGNC:6993]	15	99565417	99716466	q26.3	1
ENSG00000055044	1557.29	-0.392	0.109	-3.582	0.000341403	0.009441	down	NOP58	NOP58 ribonucleoprotein [Source:HGNC Symbol;Acc:HGNC:29926]	2	202265716	202303666	q33.1	1
ENSG00000138698	2897.09	-0.31	0.087	-3.581	0.000341893	0.009441	down	RAP1GDS1	Rap1 GTPase-GDP dissociation stimulator 1 [Source:HGNC Symbol;Acc:HGNC:9859]	4	98261384	98443861	q23	1
ENSG00000113810	1781.96	-0.55	0.154	-3.575	0.000350534	0.009542	down	SMC4	structural maintenance of chromosomes 4 [Source:HGNC Symbol;Acc:HGNC:14013]	3	160399274	160434962	q25.33	1
ENSG00000143815	2112.93	-0.422	0.118	-3.577	0.000347576	0.009542	down	LBR	lamin B receptor [Source:HGNC Symbol;Acc:HGNC:6518]	1	225401502	225428925	q42.12	-1
ENSG00000155380	3164.84	-0.399	0.112	-3.565	0.000363356	0.009822	down	SLC16A1	solute carrier family 16 member 1 [Source:HGNC Symbol;Acc:HGNC:10922]	1	112911847	112957013	p13.2	-1
ENSG00000173276	1036.63	-0.528	0.148	-3.563	0.000367227	0.009892	down	ZBTB21	zinc finger and BTB domain containing 21 [Source:HGNC Symbol;Acc:HGNC:13083]	21	41986831	42010387	q22.3	-1
ENSG00000164181	968.082	-0.538	0.152	-3.539	0.000401073	0.01058	down	ELOVL7	ELOVL fatty acid elongase 7 [Source:HGNC Symbol;Acc:HGNC:26292]	5	60751791	60844389	q12.1	-1
ENSG00000097033	9020.1	-0.35	0.099	-3.538	0.000402759	0.01059	down	SH3GLB1	SH3 domain containing GRB2 like, endophilin B1 [Source:HGNC Symbol;Acc:HGNC:10833]	1	86704570	86748184	p22.3	1
ENSG00000168827	2028.32	-0.329	0.093	-3.533	0.00041081	0.01076	down	GFM1	G elongation factor mitochondrial 1 [Source:HGNC Symbol;Acc:HGNC:13780]	3	158644278	158692575	q25.32	1
ENSG00000235897	972.487	-0.417	0.118	-3.532	0.000412836	0.01078	down	TM4SF19-AS1	TM4SF19 antisense RNA 1 [Source:HGNC Symbol;Acc:HGNC:41085]	3	196318330	196325570	q29	1
ENSG00000175352	3601.07	-0.255	0.072	-3.53	0.000415256	0.01081	down	NRIP3	nuclear receptor interacting protein 3 [Source:HGNC Symbol;Acc:HGNC:1167]	11	8980576	9004049	p15.4	-1
ENSG00000198015	983.357	-0.455	0.129	-3.529	0.0004171	0.01082	down	MRPL42	mitochondrial ribosomal protein L42 [Source:HGNC Symbol;Acc:HGNC:14493]	12	93467488	93516213	q22	1
ENSG00000104738	729.516	-0.435	0.124	-3.508	0.000451618	0.01164	down	MCM4	minichromosome maintenance complex component 4 [Source:HGNC Symbol;Acc:HGNC:6947]	8	47960185	47978160	q11.21	1
ENSG00000112249	2979.29	-0.356	0.101	-3.507	0.000453493	0.01165	down	ASCC3	activating signal cointegrator 1 complex subunit 3 [Source:HGNC Symbol;Acc:HGNC:18697]	6	100508194	100881372	q16.3	-1
ENSG00000133657	27314.4	-0.346	0.099	-3.503	0.000459188	0.01175	down	ATP13A3	ATPase 13A3 [Source:HGNC Symbol;Acc:HGNC:24113]	3	194402672	194498364	q29	-1
ENSG00000184635	241.27	-0.674	0.193	-3.495	0.000473824	0.01201	down	ZNF93	zinc finger protein 93 [Source:HGNC Symbol;Acc:HGNC:13169]	19	19900913	19963464	p12	1
ENSG00000107104	371.988	-0.573	0.164	-3.496	0.000472818	0.01201	down	KANK1	KN motif and ankyrin repeat domains 1 [Source:HGNC Symbol;Acc:HGNC:19309]	9	470291	746106	p24.3	1
ENSG00000141682	340.631	-0.726	0.208	-3.49	0.000482927	0.01213	down	PMAIP1	phorbol-12-myristate-13-acetate-induced protein 1 [Source:HGNC Symbol;Acc:HGNC:9108]	18	59899948	59904306	q21.32	1
ENSG00000116750	1244.89	-0.44	0.126	-3.491	0.000481873	0.01213	down	UCHL5	ubiquitin C-terminal hydrolase L5 [Source:HGNC Symbol;Acc:HGNC:19678]	1	193012250	193060080	q31.2	-1
ENSG00000110075	2718.86	-0.297	0.085	-3.49	0.000483411	0.01213	down	PPP6R3	protein phosphatase 6 regulatory subunit 3 [Source:HGNC Symbol;Acc:HGNC:1173]	11	68460731	68615334	q13.2	1
ENSG00000164163	3986.3	-0.474	0.136	-3.487	0.000489179	0.01221	down	ABCE1	ATP binding cassette subfamily E member 1 [Source:HGNC Symbol;Acc:HGNC:69]	4	145097932	145129179	q31.21	1
ENSG00000104267	6117.23	-0.364	0.104	-3.486	0.000489837	0.01221	down	CA2	carbonic anhydrase 2 [Source:HGNC Symbol;Acc:HGNC:1373]	8	85463852	85481493	q21.2	1
ENSG00000114686	1668.46	-0.348	0.1	-3.485	0.00049185	0.01222	down	MRPL3	mitochondrial ribosomal protein L3 [Source:HGNC Symbol;Acc:HGNC:10379]	3	131462212	131502983	q22.1	-1
ENSG00000113460	473.745	-0.573	0.164	-3.483	0.000495627	0.01226	down	BRIX1	BRX1, biogenesis of ribosomes [Source:HGNC Symbol;Acc:HGNC:24170]	5	34915376	34925996	p13.2	1
ENSG00000174173	896.366	-0.467	0.134	-3.483	0.000496618	0.01226	down	TRMT10C	tRNA methyltransferase 10C, mitochondrial RNase P subunit [Source:HGNC Symbol;Acc:HGNC:26022]	3	101561862	101566446	q12.3	1
ENSG00000078237	3374.63	-0.426	0.122	-3.481	0.000498694	0.01227	down	TIGAR	TP53 induced glycolysis regulatory phosphatase [Source:HGNC Symbol;Acc:HGNC:1185]	12	4307763	4354593	p13.32	1
ENSG00000135316	6228.26	-0.343	0.098	-3.48	0.000501472	0.0123	down	SYNCRIP	synaptotagmin binding cytoplasmic RNA interacting protein [Source:HGNC Symbol;Acc:HGNC:16918]	6	85607785	85643792	q14.3	-1
ENSG00000133119	377.481	-0.665	0.191	-3.474	0.000512197	0.01253	down	RFC3	replication factor C subunit 3 [Source:HGNC Symbol;Acc:HGNC:9971]	13	33818049	33966558	q13.2	1
ENSG00000164347	1197.73	-0.346	0.1	-3.473	0.000514842	0.01255	down	GFM2	G elongation factor mitochondrial 2 [Source:HGNC Symbol;Acc:HGNC:29682]	5	74721204	74767371	q13.3	-1
ENSG00000162607	1200.01	-0.504	0.145	-3.47	0.000520071	0.0126	down	USP1	ubiquitin specific peptidase 1 [Source:HGNC Symbol;Acc:HGNC:12607]	1	62436297	62451804	p31.3	1
ENSG00000123505	7072.59	-0.374	0.108	-3.471	0.000518674	0.0126	down	AMD1	adenosylmethionine decarboxylase 1 [Source:HGNC Symbol;Acc:HGNC:457]	6	110874770	110895713	q21	1
ENSG00000125735	1112.42	-0.523	0.151	-3.456	0.000547575	0.01318	down	TNFSF14	TNF superfamily member 14 [Source:HGNC Symbol;Acc:HGNC:11930]	19	6661253	6670588	p13.3	-1
ENSG00000168386	710.882	-0.486	0.141	-3.453	0.000554848	0.01327	down	FILIP1L	filamin A interacting protein 1 like [Source:HGNC Symbol;Acc:HGNC:24589]	3	99830141	100114513	q12.1	-1
ENSG00000155438	687.286	-0.425	0.123	-3.451	0.000557744	0.0133	down	NIFK	nucleolar protein interacting with the FHA domain of MKI67 [Source:HGNC Symbol;Acc:HGNC:17838]	2	121726945	121736923	q14.3	-1
ENSG00000072571	746.906	-0.56	0.163	-3.448	0.000563976	0.01341	down	HMMR	hyaluronan mediated motility receptor [Source:HGNC Symbol;Acc:HGNC:5012]	5	163460203	163491945	q34	1
ENSG00000170385	7087.94	-0.416	0.121	-3.441	0.000578697	0.01364	down	SLC30A1	solute carrier family 30 member 1 [Source:HGNC Symbol;Acc:HGNC:11012]	1	211571568	211578742	q32.3	-1
ENSG00000138376	361.839	-0.57	0.166	-3.43	0.000603215	0.01408	down	BARD1	BRCA1 associated RING domain 1 [Source:HGNC Symbol;Acc:HGNC:952]	2	214725646	214809711	q35	-1
ENSG00000124795	5585.15	-0.425	0.124	-3.431	0.000601566	0.01408	down	DEK	DEK proto-oncogene [Source:HGNC Symbol;Acc:HGNC:2768]	6	18223868	18264823	p22.3	-1
ENSG00000169045	7311.29	-0.301	0.088	-3.42	0.000626112	0.01444	down	HNRNPH1	heterogeneous nuclear ribonucleoprotein H1 [Source:HGNC Symbol;Acc:HGNC:5041]	5	179614178	179634784	q35.3	-1
ENSG00000121152	9378.23	-0.454	0.133	-3.416	0.000635259	0.01448	down	NCAPH	non-SMC condensin I complex subunit H [Source:HGNC Symbol;Acc:HGNC:1112]	2	96335787	96373845	q11.2	1
ENSG00000134057	734.225	-0.442	0.129	-3.416	0.000635293	0.01448	down	CCNB1	cyclin B1 [Source:HGNC Symbol;Acc:HGNC:1579]	5	69167010	69178245	q13.2	1
ENSG00000136450	3822.64	-0.344	0.101	-3.417	0.000632063	0.01448	down	SRSF1	serine and arginine rich splicing factor 1 [Source:HGNC Symbol;Acc:HGNC:10780]	17	58003360	58007346	q22	-1
ENSG00000164023	813.698	-0.444	0.13	-3.414	0.000639148	0.01453	down	SGMS2	sphingomyelin synthase 2 [Source:HGNC Symbol;Acc:HGNC:28395]	4	107824563	107915047	q25	1
ENSG00000153317	8125.17	-0.294	0.086	-3.413	0.00064342	0.01458	down	ASAP1	ArfGAP with SH3 domain, ankyrin repeat and PH domain 1 [Source:HGNC Symbol;Acc:HGNC:2720]	8	130052104	130443660	q24.22	-1
ENSG00000174442	533.429	-0.476	0.14	-3.402	0.000668012	0.01509	down	ZWILCH	zwilch kinetochore protein [Source:HGNC Symbol;Acc:HGNC:25468]	15	66504959	66550128	q22.31	1
ENSG00000163655	1189.58	-0.386	0.114	-3.402	0.000670052	0.01509	down	GMPS	guanine monophosphate synthase [Source:HGNC Symbol;Acc:HGNC:4378]	3	155870536	155944026	q25.31	1
ENSG00000163938	1767.6	-0.333	0.098	-3.396	0.00068487	0.01538	down	GNL3	G protein nucleolar 3 [Source:HGNC Symbol;Acc:HGNC:29931]	3	52681156	52694492	p21.1	1
ENSG00000136603	1366.2	-0.488	0.144	-3.393	0.000691161	0.01543	down	SKIL	SKI like proto-oncogene [Source:HGNC Symbol;Acc:HGNC:10897]	3	170357678	170396835	q26.2	1
ENSG00000135776	1048.51	-0.444	0.131	-3.394	0.00068886	0.01543	down	ABCB10	ATP binding cassette subfamily B member 10 [Source:HGNC Symbol;Acc:HGNC:41]	1	229516582	229558695	q42.13	-1
ENSG00000065548	2739.53	-0.387	0.114	-3.39	0.000698385	0.01546	down	ZC3H15	zinc finger CCCH-type containing 15 [Source:HGNC Symbol;Acc:HGNC:29528]	2	186486156	186509363	q32.1	1
ENSG00000118785	183646	-0.305	0.09	-3.389	0.000701419	0.01546	down	SPP1	secreted phosphoprotein 1 [Source:HGNC Symbol;Acc:HGNC:11255]	4	87975650	87983426	q22.1	1
ENSG00000162613	1547.52	-0.324	0.096	-3.383	0.000717815	0.01576	down	FUBP1	far upstream element binding protein 1 [Source:HGNC Symbol;Acc:HGNC:4004]	1	77944055	77979110	p31.1	-1
ENSG00000150768	1817.87	-0.372	0.11	-3.378	0.000730056	0.01593	down	DLAT	dihydrolipoamide S-acetyltransferase [Source:HGNC Symbol;Acc:HGNC:2896]	11	112024814	112064390	q23.1	1
ENSG00000099219	3594.06	-0.298	0.088	-3.375	0.000737756	0.01606	down	ERMP1	endoplasmic reticulum metallopeptidase 1 [Source:HGNC Symbol;Acc:HGNC:23703]	9	5765076	5833117	p24.1	-1
ENSG00000166451	450.414	-0.468	0.139	-3.363	0.000771722	0.0167	down	CENPN	centromere protein N [Source:HGNC Symbol;Acc:HGNC:30873]	16	81006498	81033114	q23.2	1
ENSG00000115525	2024.17	-0.302	0.09	-3.363	0.000770479	0.0167	down	ST3GAL5	ST3 beta-galactoside alpha-2,3-sialyltransferase 5 [Source:HGNC Symbol;Acc:HGNC:10872]	2	85837120	85905199	p11.2	-1
ENSG00000120963	3414.45	-0.304	0.091	-3.36	0.000778614	0.0168	down	ZNF706	zinc finger protein 706 [Source:HGNC Symbol;Acc:HGNC:24992]	8	101177878	101206193	q22.3	-1
ENSG00000121690	138.713	-0.902	0.269	-3.356	0.00079043	0.01692	down	DEPDC7	DEP domain containing 7 [Source:HGNC Symbol;Acc:HGNC:29899]	11	33015864	33033582	p13	1
ENSG00000101166	1705.19	-0.328	0.098	-3.349	0.000812301	0.01734	down	PRELID3B	PRELI domain containing 3B [Source:HGNC Symbol;Acc:HGNC:15892]	20	59033145	59042909	q13.32	-1
ENSG00000137804	785.372	-0.446	0.133	-3.346	0.000820949	0.01747	down	NUSAP1	nucleolar and spindle associated protein 1 [Source:HGNC Symbol;Acc:HGNC:18538]	15	41332694	41381050	q15.1	1
ENSG00000184292	427.53	-0.722	0.216	-3.343	0.000829747	0.01756	down	TACSTD2	tumor associated calcium signal transducer 2 [Source:HGNC Symbol;Acc:HGNC:11530]	1	58575423	58577773	p32.1	-1
ENSG00000111252	3483.45	-0.255	0.077	-3.327	0.000878713	0.0184	down	SH2B3	SH2B adaptor protein 3 [Source:HGNC Symbol;Acc:HGNC:29605]	12	111405948	111451623	q24.12	1
ENSG00000115091	31106.4	-0.325	0.098	-3.323	0.000890944	0.01855	down	ACTR3	ARP3 actin related protein 3 homolog [Source:HGNC Symbol;Acc:HGNC:170]	2	113889960	113962596	q14.1	1
ENSG00000116711	1213.56	-0.404	0.122	-3.32	0.000899495	0.01868	down	PLA2G4A	phospholipase A2 group IVA [Source:HGNC Symbol;Acc:HGNC:9035]	1	186828953	186988981	q31.1	1
ENSG00000127124	175.351	-0.82	0.248	-3.311	0.00092981	0.0192	down	HIVEP3	human immunodeficiency virus type I enhancer binding protein 3 [Source:HGNC Symbol;Acc:HGNC:13561]	1	41506365	42035925	p34.2	-1
ENSG00000140525	583.782	-0.48	0.145	-3.311	0.000929435	0.0192	down	FANCI	Fanconi anemia complementation group I [Source:HGNC Symbol;Acc:HGNC:25568]	15	89243949	89317261	q26.1	1
ENSG00000132356	2324.04	-0.42	0.127	-3.309	0.000936478	0.01929	down	PRKAA1	protein kinase AMP-activated catalytic subunit alpha 1 [Source:HGNC Symbol;Acc:HGNC:9376]	5	40759379	40798374	p13.1	-1
ENSG00000111859	384.245	-0.552	0.167	-3.308	0.000939377	0.0193	down	NEDD9	neural precursor cell expressed, developmentally down-regulated 9 [Source:HGNC Symbol;Acc:HGNC:7733]	6	11183298	11382348	p24.2	-1
ENSG00000169288	637.361	-0.506	0.153	-3.306	0.000947993	0.01942	down	MRPL1	mitochondrial ribosomal protein L1 [Source:HGNC Symbol;Acc:HGNC:14275]	4	77862520	77952790	q21.1	1
ENSG00000138821	7346.7	-0.478	0.145	-3.291	0.00099816	0.0204	down	SLC39A8	solute carrier family 39 member 8 [Source:HGNC Symbol;Acc:HGNC:20862]	4	102251041	102431258	q24	-1
ENSG00000135521	897.398	-0.494	0.15	-3.289	0.00100458	0.02047	down	LTV1	LTV1 ribosome biogenesis factor [Source:HGNC Symbol;Acc:HGNC:21173]	6	143843344	143863812	q24.2	1
ENSG00000275835	568.032	-0.418	0.127	-3.28	0.00103651	0.02104	down	TUBGCP5	tubulin gamma complex associated protein 5 [Source:HGNC Symbol;Acc:HGNC:18600]	15	22983192	23039673	q11.2	-1
ENSG00000185811	1666.4	-0.27	0.082	-3.28	0.0010376	0.02104	down	IKZF1	IKAROS family zinc finger 1 [Source:HGNC Symbol;Acc:HGNC:13176]	7	50304068	50405101	p12.2	1
ENSG00000171604	842.957	-0.461	0.141	-3.278	0.00104669	0.02116	down	CXXC5	CXXC finger protein 5 [Source:HGNC Symbol;Acc:HGNC:26943]	5	139647299	139683882	q31.2	1
ENSG00000156170	596.901	-0.488	0.149	-3.268	0.00108328	0.02185	down	NDUFAF6	NADH:ubiquinone oxidoreductase complex assembly factor 6 [Source:HGNC Symbol;Acc:HGNC:28625]	8	94895767	95116455	q22.1	1
ENSG00000138160	849.819	-0.553	0.17	-3.253	0.00114233	0.02217	down	KIF11	kinesin family member 11 [Source:HGNC Symbol;Acc:HGNC:6388]	10	92593286	92655395	q23.33	1
ENSG00000085415	1205.85	-0.363	0.111	-3.257	0.001124	0.02217	down	SEH1L	SEH1 like nucleoporin [Source:HGNC Symbol;Acc:HGNC:30379]	18	12947133	12987536	p11.21	1
ENSG00000128708	1950.12	-0.361	0.111	-3.256	0.00112872	0.02217	down	HAT1	histone acetyltransferase 1 [Source:HGNC Symbol;Acc:HGNC:4821]	2	171922448	171983682	q31.1	1
ENSG00000164654	1065.41	-0.354	0.109	-3.254	0.00113697	0.02217	down	MIOS	meiosis regulator for oocyte development [Source:HGNC Symbol;Acc:HGNC:21905]	7	7566872	7608929	p21.3	1
ENSG00000118503	2467.92	-0.352	0.108	-3.255	0.00113341	0.02217	down	TNFAIP3	TNF alpha induced protein 3 [Source:HGNC Symbol;Acc:HGNC:11896]	6	137867188	137883312	q23.3	1
ENSG00000118777	921.709	-0.333	0.102	-3.26	0.00111604	0.02217	down	ABCG2	ATP binding cassette subfamily G member 2 (Junior blood group) [Source:HGNC Symbol;Acc:HGNC:74]	4	88090264	88231322	q22.1	-1
ENSG00000177200	5405.07	-0.324	0.1	-3.254	0.00113887	0.02217	down	CHD9	chromodomain helicase DNA binding protein 9 [Source:HGNC Symbol;Acc:HGNC:25701]	16	53055033	53329150	q12.2	1
ENSG00000111530	4790.29	-0.317	0.097	-3.262	0.00110794	0.02217	down	CAND1	cullin associated and neddylation dissociated 1 [Source:HGNC Symbol;Acc:HGNC:30688]	12	67269281	67319951	q14.3	1
ENSG00000151465	1258.57	-0.315	0.097	-3.257	0.00112478	0.02217	down	CDC123	cell division cycle 123 [Source:HGNC Symbol;Acc:HGNC:16827]	10	12195965	12250589	p14	1
ENSG00000120438	3719.92	-0.275	0.085	-3.253	0.00114218	0.02217	down	TCP1	t-complex 1 [Source:HGNC Symbol;Acc:HGNC:11655]	6	159778498	159789749	q25.3	-1
ENSG00000145868	2077.54	-0.263	0.08	-3.261	0.0011092	0.02217	down	FBXO38	F-box protein 38 [Source:HGNC Symbol;Acc:HGNC:28844]	5	148383935	148442836	q32	1
ENSG00000177889	1831.01	-0.325	0.1	-3.248	0.00116302	0.02246	down	UBE2N	ubiquitin conjugating enzyme E2 N [Source:HGNC Symbol;Acc:HGNC:12492]	12	93405673	93442262	q22	-1
ENSG00000163347	179.611	-1.046	0.322	-3.243	0.00118247	0.02277	down	CLDN1	claudin 1 [Source:HGNC Symbol;Acc:HGNC:2032]	3	190305701	190322475	q28	-1
ENSG00000221914	1503.04	-0.324	0.1	-3.242	0.00118896	0.02284	down	PPP2R2A	protein phosphatase 2 regulatory subunit Balpha [Source:HGNC Symbol;Acc:HGNC:9304]	8	26291491	26372680	p21.2	1
ENSG00000108559	661.951	-0.414	0.128	-3.24	0.00119439	0.02289	down	NUP88	nucleoporin 88 [Source:HGNC Symbol;Acc:HGNC:8067]	17	5360963	5420160	p13.2	-1
ENSG00000174013	1019.85	-0.404	0.125	-3.238	0.0012029	0.0229	down	FBXO45	F-box protein 45 [Source:HGNC Symbol;Acc:HGNC:29148]	3	196568611	196589059	q29	1
ENSG00000261269	1554.19	-0.363	0.112	-3.238	0.00120396	0.0229	down			5	72439903	72442387	q13.2	-1
ENSG00000163947	1952.71	-0.29	0.09	-3.238	0.00120184	0.0229	down	ARHGEF3	Rho guanine nucleotide exchange factor 3 [Source:HGNC Symbol;Acc:HGNC:683]	3	56727418	57079329	p14.3	-1
ENSG00000128045	234.631	-0.657	0.203	-3.235	0.00121694	0.02304	down	RASL11B	RAS like family 11 member B [Source:HGNC Symbol;Acc:HGNC:23804]	4	52862290	52866835	q12	1
ENSG00000102054	2500.01	-0.273	0.084	-3.234	0.00122188	0.02307	down	RBBP7	RB binding protein 7, chromatin remodeling factor [Source:HGNC Symbol;Acc:HGNC:9890]	X	16839283	16870414	p22.2	-1
ENSG00000109606	4766.89	-0.26	0.081	-3.23	0.00123614	0.02323	down	DHX15	DEAH-box helicase 15 [Source:HGNC Symbol;Acc:HGNC:2738]	4	24517441	24584550	p15.2	-1
ENSG00000158417	4546.84	-0.345	0.107	-3.229	0.00124083	0.02326	down	EIF5B	eukaryotic translation initiation factor 5B [Source:HGNC Symbol;Acc:HGNC:30793]	2	99337353	99401326	q11.2	1
ENSG00000112697	11979.1	-0.365	0.113	-3.227	0.00125246	0.02336	down	TMEM30A	transmembrane protein 30A [Source:HGNC Symbol;Acc:HGNC:16667]	6	75252924	75284968	q14.1	-1
ENSG00000164687	7932.83	-0.304	0.094	-3.227	0.00125099	0.02336	down	FABP5	fatty acid binding protein 5 [Source:HGNC Symbol;Acc:HGNC:3560]	8	81280363	81284777	q21.13	1
ENSG00000111145	372.638	-0.637	0.197	-3.225	0.00125826	0.02341	down	ELK3	ELK3, ETS transcription factor [Source:HGNC Symbol;Acc:HGNC:3325]	12	96194382	96269835	q23.1	1
ENSG00000164949	510.945	-0.676	0.21	-3.223	0.00126724	0.02349	down	GEM	GTP binding protein overexpressed in skeletal muscle [Source:HGNC Symbol;Acc:HGNC:4234]	8	94249253	94262350	q22.1	-1
ENSG00000115053	10021.1	-0.238	0.074	-3.223	0.00126867	0.02349	down	NCL	nucleolin [Source:HGNC Symbol;Acc:HGNC:7667]	2	231453531	231483641	q37.1	-1
ENSG00000197780	1650.11	-0.455	0.141	-3.222	0.00127194	0.0235	down	TAF13	TATA-box binding protein associated factor 13 [Source:HGNC Symbol;Acc:HGNC:11546]	1	109062486	109076002	p13.3	-1
ENSG00000120756	389.742	-0.7	0.217	-3.22	0.00128066	0.0236	down	PLS1	plastin 1 [Source:HGNC Symbol;Acc:HGNC:9090]	3	142596387	142713664	q23	1
ENSG00000116120	878.905	-0.408	0.127	-3.218	0.00128926	0.02371	down	FARSB	phenylalanyl-tRNA synthetase beta subunit [Source:HGNC Symbol;Acc:HGNC:17800]	2	222570536	222656337	q36.1	-1
ENSG00000165704	792.378	-0.413	0.128	-3.214	0.00130764	0.02387	down	HPRT1	hypoxanthine phosphoribosyltransferase 1 [Source:HGNC Symbol;Acc:HGNC:5157]	X	134460153	134520513	q26.2	1
ENSG00000130935	1063.97	-0.368	0.115	-3.209	0.00133374	0.02423	down	NOL11	nucleolar protein 11 [Source:HGNC Symbol;Acc:HGNC:24557]	17	67717833	67744531	q24.2	1
ENSG00000058091	1954.45	-0.346	0.108	-3.209	0.00133065	0.02423	down	CDK14	cyclin dependent kinase 14 [Source:HGNC Symbol;Acc:HGNC:8883]	7	90466424	91210590	q21.13	1
ENSG00000164466	630.389	-0.429	0.134	-3.207	0.00134322	0.02435	down	SFXN1	sideroflexin 1 [Source:HGNC Symbol;Acc:HGNC:16085]	5	175477062	175529742	q35.2	1
ENSG00000104381	337.081	-0.526	0.164	-3.203	0.00136206	0.02463	down	GDAP1	ganglioside induced differentiation associated protein 1 [Source:HGNC Symbol;Acc:HGNC:15968]	8	74321130	74488872	q21.11	1
ENSG00000147231	184.377	-0.75	0.235	-3.193	0.00140617	0.02519	down	CXorf57	chromosome X open reading frame 57 [Source:HGNC Symbol;Acc:HGNC:25486]	X	106611930	106679442	q22.3	1
ENSG00000136492	243.931	-0.657	0.206	-3.194	0.00140223	0.02519	down	BRIP1	BRCA1 interacting protein C-terminal helicase 1 [Source:HGNC Symbol;Acc:HGNC:20473]	17	61681266	61863521	q23.2	-1
ENSG00000132669	1583.98	-0.291	0.091	-3.194	0.00140228	0.02519	down	RIN2	Ras and Rab interactor 2 [Source:HGNC Symbol;Acc:HGNC:18750]	20	19886521	20002457	p11.23	1
ENSG00000071537	10277.1	-0.243	0.076	-3.194	0.00140547	0.02519	down	SEL1L	SEL1L ERAD E3 ligase adaptor subunit [Source:HGNC Symbol;Acc:HGNC:10717]	14	81471549	81533861	q31.1	-1
ENSG00000203797	578.047	-0.417	0.131	-3.192	0.00141113	0.02522	down	DDO	D-aspartate oxidase [Source:HGNC Symbol;Acc:HGNC:2727]	6	110391771	110415562	q21	-1
ENSG00000187210	584.279	-0.51	0.16	-3.192	0.00141457	0.02523	down	GCNT1	glucosaminyl (N-acetyl) transferase 1, core 2 [Source:HGNC Symbol;Acc:HGNC:4203]	9	76419850	76507416	q21.13	1
ENSG00000024526	307.998	-0.847	0.266	-3.188	0.00143255	0.02531	down	DEPDC1	DEP domain containing 1 [Source:HGNC Symbol;Acc:HGNC:22949]	1	68474152	68497221	p31.3	-1
ENSG00000115541	608.306	-0.499	0.157	-3.188	0.00143221	0.02531	down	HSPE1	heat shock protein family E (Hsp10) member 1 [Source:HGNC Symbol;Acc:HGNC:5269]	2	197499994	197503457	q33.1	1
ENSG00000122591	1356.98	-0.317	0.099	-3.189	0.00142621	0.02531	down	FAM126A	family with sequence similarity 126 member A [Source:HGNC Symbol;Acc:HGNC:24587]	7	22889371	23014130	p15.3	-1
ENSG00000094804	225.7	-0.712	0.224	-3.18	0.00147145	0.02582	down	CDC6	cell division cycle 6 [Source:HGNC Symbol;Acc:HGNC:1744]	17	40287633	40304657	q21.2	1
ENSG00000101003	328.525	-0.525	0.165	-3.176	0.00149262	0.02602	down	GINS1	GINS complex subunit 1 [Source:HGNC Symbol;Acc:HGNC:28980]	20	25407727	25452628	p11.21	1
ENSG00000137869	330.407	-0.612	0.193	-3.175	0.00149798	0.02605	down	CYP19A1	cytochrome P450 family 19 subfamily A member 1 [Source:HGNC Symbol;Acc:HGNC:2594]	15	51208057	51338610	q21.2	-1
ENSG00000143549	11930.9	-0.205	0.065	-3.165	0.00154924	0.02664	down	TPM3	tropomyosin 3 [Source:HGNC Symbol;Acc:HGNC:12012]	1	154155304	154194648	q21.3	-1
ENSG00000138071	34791.5	-0.295	0.093	-3.165	0.00155316	0.02665	down	ACTR2	ARP2 actin related protein 2 homolog [Source:HGNC Symbol;Acc:HGNC:169]	2	65227753	65271253	p14	1
ENSG00000128245	2489.7	-0.271	0.086	-3.16	0.00157588	0.02686	down	YWHAH	tyrosine 3-monooxygenase/tryptophan 5-monooxygenase activation protein eta [Source:HGNC Symbol;Acc:HGNC:12853]	22	31944461	31957603	q12.3	1
ENSG00000136108	1267.52	-0.361	0.114	-3.158	0.00159078	0.02699	down	CKAP2	cytoskeleton associated protein 2 [Source:HGNC Symbol;Acc:HGNC:1990]	13	52455429	52476628	q14.3	1
ENSG00000112742	367.156	-0.718	0.228	-3.155	0.00160407	0.0271	down	TTK	TTK protein kinase [Source:HGNC Symbol;Acc:HGNC:12401]	6	80003887	80042527	q14.1	1
ENSG00000205339	7830.26	-0.324	0.103	-3.156	0.00160164	0.0271	down	IPO7	importin 7 [Source:HGNC Symbol;Acc:HGNC:9852]	11	9384622	9448126	p15.4	1
ENSG00000164120	3785.32	-0.499	0.158	-3.152	0.00161902	0.02729	down	HPGD	15-hydroxyprostaglandin dehydrogenase [Source:HGNC Symbol;Acc:HGNC:5154]	4	174490177	174523154	q34.1	-1
ENSG00000081307	995.384	-0.395	0.126	-3.148	0.00164161	0.02756	down	UBA5	ubiquitin like modifier activating enzyme 5 [Source:HGNC Symbol;Acc:HGNC:23230]	3	132654446	132678097	q22.1	1
ENSG00000166483	243.55	-0.644	0.205	-3.136	0.00171244	0.02831	down	WEE1	WEE1 G2 checkpoint kinase [Source:HGNC Symbol;Acc:HGNC:12761]	11	9573681	9593457	p15.4	1
ENSG00000145685	13670.7	-0.218	0.069	-3.135	0.00171933	0.02836	down	LHFPL2	LHFPL tetraspan subfamily member 2 [Source:HGNC Symbol;Acc:HGNC:6588]	5	78485215	78770021	q14.1	-1
ENSG00000214114	407.125	-0.477	0.152	-3.132	0.0017344	0.02855	down	MYCBP	MYC binding protein [Source:HGNC Symbol;Acc:HGNC:7554]	1	38862964	38874105	p34.3	-1
ENSG00000152795	3848.53	-0.339	0.108	-3.13	0.00174968	0.02874	down	HNRNPDL	heterogeneous nuclear ribonucleoprotein D like [Source:HGNC Symbol;Acc:HGNC:5037]	4	82422564	82430408	q21.22	-1
ENSG00000156876	231.499	-0.615	0.197	-3.127	0.00176665	0.02896	down	SASS6	SAS-6 centriolar assembly protein [Source:HGNC Symbol;Acc:HGNC:25403]	1	100083563	100132955	p21.2	-1
ENSG00000142731	295.791	-0.659	0.211	-3.122	0.00179695	0.02927	down	PLK4	polo like kinase 4 [Source:HGNC Symbol;Acc:HGNC:11397]	4	127880861	127899195	q28.1	1
ENSG00000109805	636.421	-0.619	0.198	-3.122	0.00179338	0.02927	down	NCAPG	non-SMC condensin I complex subunit G [Source:HGNC Symbol;Acc:HGNC:24304]	4	17810902	17844862	p15.31	1
ENSG00000009335	1976.11	-0.267	0.086	-3.123	0.00179301	0.02927	down	UBE3C	ubiquitin protein ligase E3C [Source:HGNC Symbol;Acc:HGNC:16803]	7	157138913	157269372	q36.3	1
ENSG00000185070	916.802	-0.355	0.114	-3.112	0.00185708	0.03006	down	FLRT2	fibronectin leucine rich transmembrane protein 2 [Source:HGNC Symbol;Acc:HGNC:3761]	14	85530144	85654426	q31.3	1
ENSG00000069275	5468.88	-0.271	0.087	-3.112	0.00185706	0.03006	down	NUCKS1	nuclear casein kinase and cyclin dependent kinase substrate 1 [Source:HGNC Symbol;Acc:HGNC:29923]	1	205712819	205750276	q32.1	-1
ENSG00000099901	414.761	-0.481	0.155	-3.103	0.00191788	0.03098	down	RANBP1	RAN binding protein 1 [Source:HGNC Symbol;Acc:HGNC:9847]	22	20115938	20127357	q11.21	1
ENSG00000165240	1715.51	-0.3	0.097	-3.099	0.00193988	0.03127	down	ATP7A	ATPase copper transporting alpha [Source:HGNC Symbol;Acc:HGNC:869]	X	77910656	78050395	q21.1	1
ENSG00000134371	2170.03	-0.281	0.091	-3.092	0.00198917	0.03179	down	CDC73	cell division cycle 73 [Source:HGNC Symbol;Acc:HGNC:16783]	1	193121997	193253901	q31.2	1
ENSG00000123737	709.041	-0.375	0.121	-3.09	0.00200358	0.03196	down	EXOSC9	exosome component 9 [Source:HGNC Symbol;Acc:HGNC:9137]	4	121801317	121817021	q27	1
ENSG00000148153	1085.35	-0.312	0.101	-3.086	0.00203071	0.03232	down	INIP	INTS3 and NABP interacting protein [Source:HGNC Symbol;Acc:HGNC:24994]	9	112683926	112718236	q32	-1
ENSG00000118246	1512.08	-0.374	0.122	-3.076	0.00209732	0.03325	down	FASTKD2	FAST kinase domains 2 [Source:HGNC Symbol;Acc:HGNC:29160]	2	206765357	206792509	q33.3	1
ENSG00000181744	636.678	-0.495	0.161	-3.064	0.00218245	0.03424	down	C3orf58	chromosome 3 open reading frame 58 [Source:HGNC Symbol;Acc:HGNC:28490]	3	143971798	144048719	q24	1
ENSG00000088205	2070.31	-0.306	0.1	-3.065	0.00217903	0.03424	down	DDX18	DEAD-box helicase 18 [Source:HGNC Symbol;Acc:HGNC:2741]	2	117814650	117832379	q14.1	1
ENSG00000160352	640.365	-0.473	0.154	-3.059	0.00222287	0.03481	down	ZNF714	zinc finger protein 714 [Source:HGNC Symbol;Acc:HGNC:27124]	19	21082159	21125270	p12	1
ENSG00000147509	497.59	-0.487	0.159	-3.058	0.00222947	0.03484	down	RGS20	regulator of G protein signaling 20 [Source:HGNC Symbol;Acc:HGNC:14600]	8	53851808	53959303	q11.23	1
ENSG00000113387	2947.16	-0.325	0.106	-3.056	0.00224402	0.035	down	SUB1	SUB1 homolog, transcriptional regulator [Source:HGNC Symbol;Acc:HGNC:19985]	5	32531633	32604079	p13.3	1
ENSG00000124479	165.933	-1.242	0.407	-3.05	0.00228944	0.03563	down	NDP	NDP, norrin cystine knot growth factor [Source:HGNC Symbol;Acc:HGNC:7678]	X	43948776	43973504	p11.3	-1
ENSG00000081014	1941.22	-0.372	0.122	-3.046	0.00231575	0.0359	down	AP4E1	adaptor related protein complex 4 epsilon 1 subunit [Source:HGNC Symbol;Acc:HGNC:573]	15	50908672	51005900	q21.2	1
ENSG00000087263	838.642	-0.375	0.123	-3.042	0.0023478	0.03625	down	OGFOD1	2-oxoglutarate and iron dependent oxygenase domain containing 1 [Source:HGNC Symbol;Acc:HGNC:25585]	16	56451490	56479100	q13	1
ENSG00000095002	1017.58	-0.427	0.141	-3.039	0.00237275	0.03656	down	MSH2	mutS homolog 2 [Source:HGNC Symbol;Acc:HGNC:7325]	2	47402969	47663146	p21	1
ENSG00000234883	564.998	-0.599	0.197	-3.034	0.00241428	0.03713	down	MIR155HG	MIR155 host gene [Source:HGNC Symbol;Acc:HGNC:35460]	21	25561909	25575168	q21.3	1
ENSG00000165244	204.541	-0.891	0.294	-3.029	0.0024561	0.03761	down	ZNF367	zinc finger protein 367 [Source:HGNC Symbol;Acc:HGNC:18320]	9	96385941	96418329	q22.32	-1
ENSG00000108506	684.376	-0.359	0.118	-3.028	0.00246042	0.03761	down	INTS2	integrator complex subunit 2 [Source:HGNC Symbol;Acc:HGNC:29241]	17	61865367	61928016	q23.2	-1
ENSG00000150093	15598.7	-0.224	0.074	-3.027	0.00246641	0.03763	down	ITGB1	integrin subunit beta 1 [Source:HGNC Symbol;Acc:HGNC:6153]	10	32900319	33005792	p11.22	-1
ENSG00000095637	172.036	-0.829	0.274	-3.023	0.00250192	0.03794	down	SORBS1	sorbin and SH3 domain containing 1 [Source:HGNC Symbol;Acc:HGNC:14565]	10	95311771	95561414	q24.1	-1
ENSG00000163808	219.582	-0.728	0.241	-3.024	0.00249675	0.03794	down	KIF15	kinesin family member 15 [Source:HGNC Symbol;Acc:HGNC:17273]	3	44761717	44873376	p21.31	1
ENSG00000127334	2701.98	-0.367	0.121	-3.024	0.00249519	0.03794	down	DYRK2	dual specificity tyrosine phosphorylation regulated kinase 2 [Source:HGNC Symbol;Acc:HGNC:3093]	12	67648338	67665406	q15	1
ENSG00000198604	3828.64	-0.325	0.107	-3.022	0.00251268	0.03803	down	BAZ1A	bromodomain adjacent to zinc finger domain 1A [Source:HGNC Symbol;Acc:HGNC:960]	14	34752731	34875647	q13.2	-1
ENSG00000082153	6975.92	-0.269	0.089	-3.015	0.00257261	0.03871	down	BZW1	basic leucine zipper and W2 domains 1 [Source:HGNC Symbol;Acc:HGNC:18380]	2	200810594	200827338	q33.1	1
ENSG00000134294	10619.7	-0.38	0.126	-3.012	0.00259605	0.03891	down	SLC38A2	solute carrier family 38 member 2 [Source:HGNC Symbol;Acc:HGNC:13448]	12	46358189	46372867	q13.11	-1
ENSG00000198836	4321.01	-0.292	0.097	-3.011	0.0026034	0.03891	down	OPA1	OPA1, mitochondrial dynamin like GTPase [Source:HGNC Symbol;Acc:HGNC:8140]	3	193593144	193697823	q29	1
ENSG00000091483	3645	-0.254	0.084	-3.011	0.00260597	0.03891	down	FH	fumarate hydratase [Source:HGNC Symbol;Acc:HGNC:3700]	1	241497603	241519761	q43	-1
ENSG00000142864	5787.56	-0.305	0.101	-3.008	0.00262671	0.03912	down	SERBP1	SERPINE1 mRNA binding protein 1 [Source:HGNC Symbol;Acc:HGNC:17860]	1	67407810	67430415	p31.3	-1
ENSG00000141232	2439.2	-0.312	0.104	-3.007	0.00263911	0.03917	down	TOB1	transducer of ERBB2, 1 [Source:HGNC Symbol;Acc:HGNC:11979]	17	50862223	50867978	q21.33	-1
ENSG00000080839	683.124	-0.413	0.138	-3.001	0.00269479	0.03954	down	RBL1	RB transcriptional corepressor like 1 [Source:HGNC Symbol;Acc:HGNC:9893]	20	36996349	37095995	q11.23	-1
ENSG00000151233	1009.51	-0.373	0.124	-3.001	0.0026911	0.03954	down	GXYLT1	glucoside xylosyltransferase 1 [Source:HGNC Symbol;Acc:HGNC:27482]	12	42081845	42144879	q12	-1
ENSG00000164924	33285.4	-0.304	0.101	-2.998	0.00271547	0.03977	down	YWHAZ	tyrosine 3-monooxygenase/tryptophan 5-monooxygenase activation protein zeta [Source:HGNC Symbol;Acc:HGNC:12855]	8	100916525	100953388	q22.3	-1
ENSG00000138678	4813.87	-0.285	0.095	-2.997	0.00272487	0.03983	down	GPAT3	glycerol-3-phosphate acyltransferase 3 [Source:HGNC Symbol;Acc:HGNC:28157]	4	83535914	83605875	q21.23	1
ENSG00000196639	362.337	-0.541	0.181	-2.995	0.00274431	0.04004	down	HRH1	histamine receptor H1 [Source:HGNC Symbol;Acc:HGNC:5182]	3	11137093	11263557	p25.3	1
ENSG00000197170	2353.63	-0.406	0.136	-2.993	0.00276233	0.04023	down	PSMD12	proteasome 26S subunit, non-ATPase 12 [Source:HGNC Symbol;Acc:HGNC:9557]	17	67337916	67366627	q24.2	-1
ENSG00000112297	8193.47	-0.253	0.084	-2.992	0.00277527	0.04034	down	CRYBG1	crystallin beta-gamma domain containing 1 [Source:HGNC Symbol;Acc:HGNC:356]	6	106360808	106571978	q21	1
ENSG00000137692	565.481	-0.416	0.139	-2.991	0.00278516	0.04037	down	DCUN1D5	defective in cullin neddylation 1 domain containing 5 [Source:HGNC Symbol;Acc:HGNC:28409]	11	103062076	103092215	q22.3	-1
ENSG00000167635	1760.73	-0.36	0.12	-2.99	0.00278788	0.04037	down	ZNF146	zinc finger protein 146 [Source:HGNC Symbol;Acc:HGNC:12931]	19	36214602	36238774	q13.12	1
ENSG00000143933	19399.8	-0.301	0.101	-2.988	0.00280352	0.04052	down	CALM2	calmodulin 2 [Source:HGNC Symbol;Acc:HGNC:1445]	2	47160082	47176601	p21	-1
ENSG00000139343	317.803	-0.524	0.175	-2.988	0.00280998	0.04054	down	SNRPF	small nuclear ribonucleoprotein polypeptide F [Source:HGNC Symbol;Acc:HGNC:11162]	12	95858928	95903828	q23.1	1
ENSG00000143401	1902.33	-0.397	0.133	-2.984	0.00284596	0.04091	down	ANP32E	acidic nuclear phosphoprotein 32 family member E [Source:HGNC Symbol;Acc:HGNC:16673]	1	150218417	150236156	q21.2	-1
ENSG00000173145	611.475	-0.443	0.148	-2.982	0.00286406	0.04109	down	NOC3L	NOC3 like DNA replication regulator [Source:HGNC Symbol;Acc:HGNC:24034]	10	94333226	94362959	q23.33	-1
ENSG00000170855	798.328	-0.328	0.11	-2.98	0.00287832	0.04114	down	TRIAP1	TP53 regulated inhibitor of apoptosis 1 [Source:HGNC Symbol;Acc:HGNC:26937]	12	120443961	120446412	q24.31	-1
ENSG00000140526	4794.74	-0.189	0.063	-2.972	0.00295646	0.0421	down	ABHD2	abhydrolase domain containing 2 [Source:HGNC Symbol;Acc:HGNC:18717]	15	89087459	89202360	q26.1	1
ENSG00000170345	333.913	-0.621	0.209	-2.971	0.00296378	0.04213	down	FOS	Fos proto-oncogene, AP-1 transcription factor subunit [Source:HGNC Symbol;Acc:HGNC:3796]	14	75278774	75282230	q24.3	1
ENSG00000119787	878.563	-0.358	0.121	-2.963	0.00304698	0.04307	down	ATL2	atlastin GTPase 2 [Source:HGNC Symbol;Acc:HGNC:24047]	2	38294880	38377285	p22.1	-1
ENSG00000167088	513.714	-0.372	0.126	-2.96	0.00307455	0.04338	down	SNRPD1	small nuclear ribonucleoprotein D1 polypeptide [Source:HGNC Symbol;Acc:HGNC:11158]	18	21612267	21633524	q11.2	1
ENSG00000154582	3668.22	-0.311	0.105	-2.958	0.00310063	0.04367	down	ELOC	elongin C [Source:HGNC Symbol;Acc:HGNC:11617]	8	73939169	73972287	q21.11	-1
ENSG00000198363	8289.71	-0.303	0.103	-2.951	0.00316585	0.04451	down	ASPH	aspartate beta-hydroxylase [Source:HGNC Symbol;Acc:HGNC:757]	8	61500556	61714640	q12.3	-1
ENSG00000167325	1595.92	-0.289	0.098	-2.95	0.0031726	0.04452	down	RRM1	ribonucleotide reductase catalytic subunit M1 [Source:HGNC Symbol;Acc:HGNC:10451]	11	4094707	4138876	p15.4	1
ENSG00000163466	15991.9	-0.231	0.078	-2.949	0.0031899	0.04468	down	ARPC2	actin related protein 2/3 complex subunit 2 [Source:HGNC Symbol;Acc:HGNC:705]	2	218217094	218254356	q35	1
ENSG00000164985	720.609	-0.426	0.145	-2.948	0.00320281	0.0447	down	PSIP1	PC4 and SFRS1 interacting protein 1 [Source:HGNC Symbol;Acc:HGNC:9527]	9	15464066	15511019	p22.3	-1
ENSG00000176208	240.144	-0.707	0.24	-2.946	0.00321665	0.04479	down	ATAD5	ATPase family, AAA domain containing 5 [Source:HGNC Symbol;Acc:HGNC:25752]	17	30831970	30895869	q11.2	1
ENSG00000172575	550.353	-0.532	0.181	-2.944	0.0032375	0.04479	down	RASGRP1	RAS guanyl releasing protein 1 [Source:HGNC Symbol;Acc:HGNC:9878]	15	38488103	38565575	q14	-1
ENSG00000128059	409.747	-0.509	0.173	-2.945	0.00322586	0.04479	down	PPAT	phosphoribosyl pyrophosphate amidotransferase [Source:HGNC Symbol;Acc:HGNC:9238]	4	56393362	56435615	q12	-1
ENSG00000102445	391.576	-0.443	0.15	-2.944	0.00323956	0.04479	down	RUBCNL	RUN and cysteine rich domain containing beclin 1 interacting protein like [Source:HGNC Symbol;Acc:HGNC:20420]	13	46342000	46438190	q14.13	-1
ENSG00000120694	7192.45	-0.331	0.112	-2.94	0.00328229	0.04501	down	HSPH1	heat shock protein family H (Hsp110) member 1 [Source:HGNC Symbol;Acc:HGNC:16969]	13	31134974	31162388	q12.3	-1
ENSG00000039123	2643.13	-0.299	0.102	-2.94	0.00328312	0.04501	down	MTREX	Mtr4 exosome RNA helicase [Source:HGNC Symbol;Acc:HGNC:18734]	5	55307760	55425581	q11.2	1
ENSG00000082212	5355.19	-0.256	0.087	-2.94	0.00328115	0.04501	down	ME2	malic enzyme 2 [Source:HGNC Symbol;Acc:HGNC:6984]	18	50878734	50954257	q21.2	1
ENSG00000166226	3030.09	-0.255	0.087	-2.941	0.00326807	0.04501	down	CCT2	chaperonin containing TCP1 subunit 2 [Source:HGNC Symbol;Acc:HGNC:1615]	12	69585334	69601570	q15	1
ENSG00000177150	485.265	-0.389	0.132	-2.938	0.00330015	0.04516	down	FAM210A	family with sequence similarity 210 member A [Source:HGNC Symbol;Acc:HGNC:28346]	18	13663347	13726663	p11.21	-1
ENSG00000099810	1022.29	-0.388	0.132	-2.937	0.00331267	0.04525	down	MTAP	methylthioadenosine phosphorylase [Source:HGNC Symbol;Acc:HGNC:7413]	9	21802543	21937651	p21.3	1
ENSG00000123473	366.007	-0.447	0.152	-2.935	0.00334037	0.04539	down	STIL	STIL, centriolar assembly protein [Source:HGNC Symbol;Acc:HGNC:10879]	1	47250139	47314147	p33	-1
ENSG00000152240	473.706	-0.436	0.149	-2.934	0.00334673	0.04539	down	HAUS1	HAUS augmin like complex subunit 1 [Source:HGNC Symbol;Acc:HGNC:25174]	18	46104332	46128333	q21.1	1
ENSG00000133706	3232.48	-0.276	0.094	-2.935	0.00334067	0.04539	down	LARS	leucyl-tRNA synthetase [Source:HGNC Symbol;Acc:HGNC:6512]	5	146113038	146182660	q32	-1
ENSG00000138180	905.309	-0.463	0.158	-2.93	0.00338433	0.04582	down	CEP55	centrosomal protein 55 [Source:HGNC Symbol;Acc:HGNC:1161]	10	93496632	93529092	q23.33	1
ENSG00000163781	1833.43	-0.328	0.112	-2.929	0.00340012	0.04596	down	TOPBP1	DNA topoisomerase II binding protein 1 [Source:HGNC Symbol;Acc:HGNC:17008]	3	133598175	133662380	q22.1	-1
ENSG00000164032	2473.62	-0.353	0.121	-2.926	0.00343054	0.04629	down	H2AFZ	H2A histone family member Z [Source:HGNC Symbol;Acc:HGNC:4741]	4	99948086	99950388	q23	-1
ENSG00000068366	10434	-0.34	0.116	-2.924	0.00345572	0.04646	down	ACSL4	acyl-CoA synthetase long chain family member 4 [Source:HGNC Symbol;Acc:HGNC:3571]	X	109624244	109733403	q23	-1
ENSG00000155561	2006.49	-0.239	0.082	-2.91	0.00361949	0.04833	down	NUP205	nucleoporin 205 [Source:HGNC Symbol;Acc:HGNC:18658]	7	135557919	135648757	q33	1
ENSG00000146918	742.763	-0.345	0.119	-2.906	0.0036666	0.04887	down	NCAPG2	non-SMC condensin II complex subunit G2 [Source:HGNC Symbol;Acc:HGNC:21904]	7	158631311	158704829	q36.3	-1
ENSG00000137168	500.872	-0.424	0.146	-2.902	0.00370856	0.04935	down	PPIL1	peptidylprolyl isomerase like 1 [Source:HGNC Symbol;Acc:HGNC:9260]	6	36854827	36875024	p21.2	-1
