# Supplementary material for: The antibiotic bedaquiline activates host macrophage innate immune resistance to bacterial infection
Source: eLife. 2020 May 4;9:e55692. doi: 10.7554/eLife.55692 (PMC7200153; doi:10.7554/eLife.55692)
Supplement: Figure 1—source data 3. — FDR < 0.05. [file elife-55692-fig1-data3.xlsx]

## Sheet: Feuil1
ensembl_gene_id	baseMean	log2FoldChange	lfcSE	stat	pvalue	padj	direction	hgnc_symbol	description	chromosome_name	start_position	end_position	band	strand
ENSG00000075651	1784.33	0.867	0.107	8.087	6.1196e-16	5.173e-13	up	PLD1	phospholipase D1 [Source:HGNC Symbol;Acc:HGNC:9067]	3	171600405	171810950	q26.31	-1
ENSG00000112299	839.184	0.917	0.138	6.666	2.63397e-11	8.619e-09	up	VNN1	vanin 1 [Source:HGNC Symbol;Acc:HGNC:12705]	6	132681590	132714049	q23.2	-1
ENSG00000088854	1289.43	0.688	0.108	6.391	1.65057e-10	4.784e-08	up	C20orf194	chromosome 20 open reading frame 194 [Source:HGNC Symbol;Acc:HGNC:17721]	20	3249305	3407625	p13	-1
ENSG00000101290	3298.27	0.461	0.072	6.37	1.89061e-10	4.918e-08	up	CDS2	CDP-diacylglycerol synthase 2 [Source:HGNC Symbol;Acc:HGNC:1801]	20	5126786	5197887	p12.3	1
ENSG00000197046	603.359	1.04	0.171	6.067	1.30603e-09	2.324e-07	up	SIGLEC15	sialic acid binding Ig like lectin 15 [Source:HGNC Symbol;Acc:HGNC:27596]	18	45825512	45844080	q12.3	1
ENSG00000073060	241.936	1.703	0.282	6.034	1.60301e-09	2.756e-07	up	SCARB1	scavenger receptor class B member 1 [Source:HGNC Symbol;Acc:HGNC:1664]	12	124776856	124882668	q24.31	-1
ENSG00000186283	740.381	0.948	0.158	6.006	1.90677e-09	3.224e-07	up	TOR3A	torsin family 3 member A [Source:HGNC Symbol;Acc:HGNC:11997]	1	179081377	179098023	q25.2	1
ENSG00000104081	115.238	1.861	0.322	5.778	7.54043e-09	1.093e-06	up	BMF	Bcl2 modifying factor [Source:HGNC Symbol;Acc:HGNC:24132]	15	40087890	40108892	q15.1	-1
ENSG00000122861	456.582	1.271	0.231	5.489	4.04359e-08	4.826e-06	up	PLAU	plasminogen activator, urokinase [Source:HGNC Symbol;Acc:HGNC:9052]	10	73909177	73917497	q22.2	1
ENSG00000159023	1633.97	0.445	0.082	5.432	5.55801e-08	6.264e-06	up	EPB41	erythrocyte membrane protein band 4.1 [Source:HGNC Symbol;Acc:HGNC:3377]	1	28887091	29120046	p35.3	1
ENSG00000183049	240.281	1.102	0.204	5.406	6.42789e-08	7.011e-06	up	CAMK1D	calcium/calmodulin dependent protein kinase ID [Source:HGNC Symbol;Acc:HGNC:19341]	10	12349482	12835545	p13	1
ENSG00000176903	658.808	0.628	0.116	5.399	6.68905e-08	7.139e-06	up	PNMA1	PNMA family member 1 [Source:HGNC Symbol;Acc:HGNC:9158]	14	73711783	73714372	q24.3	-1
ENSG00000186818	1683.44	0.664	0.123	5.382	7.3804e-08	7.718e-06	up	LILRB4	leukocyte immunoglobulin like receptor B4 [Source:HGNC Symbol;Acc:HGNC:6608]	19	54643889	54670359	q13.42	1
ENSG00000149483	2775.12	0.749	0.139	5.374	7.68538e-08	7.955e-06	up	TMEM138	transmembrane protein 138 [Source:HGNC Symbol;Acc:HGNC:26944]	11	61362001	61369509	q12.2	1
ENSG00000184602	915.685	0.666	0.125	5.334	9.58201e-08	9.717e-06	up	SNN	stannin [Source:HGNC Symbol;Acc:HGNC:11149]	16	11668414	11679159	p13.13	1
ENSG00000121966	590.213	0.855	0.161	5.298	1.17286e-07	1.144e-05	up	CXCR4	C-X-C motif chemokine receptor 4 [Source:HGNC Symbol;Acc:HGNC:2561]	2	136114349	136118165	q22.1	-1
ENSG00000162144	411.987	1.378	0.269	5.129	2.91579e-07	2.496e-05	up	CYB561A3	cytochrome b561 family member A3 [Source:HGNC Symbol;Acc:HGNC:23014]	11	61348745	61362299	q12.2	-1
ENSG00000107551	5378.89	0.499	0.098	5.104	3.3321e-07	2.771e-05	up	RASSF4	Ras association domain family member 4 [Source:HGNC Symbol;Acc:HGNC:20793]	10	44959407	44995891	q11.21	1
ENSG00000115107	589.822	0.724	0.143	5.059	4.21438e-07	3.325e-05	up	STEAP3	STEAP3 metalloreductase [Source:HGNC Symbol;Acc:HGNC:24592]	2	119223831	119265652	q14.2	1
ENSG00000105875	228.495	1.08	0.213	5.057	4.25727e-07	3.325e-05	up	WDR91	WD repeat domain 91 [Source:HGNC Symbol;Acc:HGNC:24997]	7	135183839	135211534	q33	-1
ENSG00000162407	1988.61	0.532	0.105	5.053	4.35346e-07	3.371e-05	up	PLPP3	phospholipid phosphatase 3 [Source:HGNC Symbol;Acc:HGNC:9229]	1	56494747	56645301	p32.2	-1
ENSG00000150995	4517.43	0.421	0.084	5.033	4.82275e-07	3.678e-05	up	ITPR1	inositol 1,4,5-trisphosphate receptor type 1 [Source:HGNC Symbol;Acc:HGNC:6180]	3	4493348	4847840	p26.1	1
ENSG00000136235	129035	0.309	0.062	5.011	5.40654e-07	4.053e-05	up	GPNMB	glycoprotein nmb [Source:HGNC Symbol;Acc:HGNC:4462]	7	23235967	23275108	p15.3	1
ENSG00000143387	5139.77	0.476	0.095	4.988	6.10849e-07	4.427e-05	up	CTSK	cathepsin K [Source:HGNC Symbol;Acc:HGNC:2536]	1	150796208	150808323	q21.3	-1
ENSG00000189067	18005.3	0.346	0.07	4.96	7.03761e-07	4.923e-05	up	LITAF	lipopolysaccharide induced TNF factor [Source:HGNC Symbol;Acc:HGNC:16841]	16	11547722	11636381	p13.13	-1
ENSG00000206503	5871.49	0.813	0.164	4.961	7.02976e-07	4.923e-05	up	HLA-A	major histocompatibility complex, class I, A [Source:HGNC Symbol;Acc:HGNC:4931]	6	29941260	29945884	p22.1	1
ENSG00000141540	236.474	1.018	0.205	4.957	7.16386e-07	4.944e-05	up	TTYH2	tweety family member 2 [Source:HGNC Symbol;Acc:HGNC:13877]	17	74213514	74262020	q25.1	1
ENSG00000266412	22344.4	0.316	0.064	4.947	7.54594e-07	5.137e-05	up	NCOA4	nuclear receptor coactivator 4 [Source:HGNC Symbol;Acc:HGNC:7671]	10	46005088	46030714	q11.22	-1
ENSG00000150054	241.68	1.114	0.226	4.934	8.06401e-07	5.453e-05	up	MPP7	membrane palmitoylated protein 7 [Source:HGNC Symbol;Acc:HGNC:26542]	10	28050993	28334486	p12.1	-1
ENSG00000101336	886.988	1.134	0.232	4.888	1.02022e-06	6.72e-05	up	HCK	HCK proto-oncogene, Src family tyrosine kinase [Source:HGNC Symbol;Acc:HGNC:4840]	20	32052188	32101856	q11.21	1
ENSG00000112303	448.549	0.735	0.151	4.883	1.04477e-06	6.801e-05	up	VNN2	vanin 2 [Source:HGNC Symbol;Acc:HGNC:12706]	6	132743870	132763459	q23.2	-1
ENSG00000157227	1652.8	0.943	0.194	4.851	1.23106e-06	7.854e-05	up	MMP14	matrix metallopeptidase 14 [Source:HGNC Symbol;Acc:HGNC:7160]	14	22836557	22849027	q11.2	1
ENSG00000072121	2886.9	0.561	0.116	4.844	1.27082e-06	7.958e-05	up	ZFYVE26	zinc finger FYVE-type containing 26 [Source:HGNC Symbol;Acc:HGNC:20761]	14	67727374	67816590	q24.1	-1
ENSG00000166347	663.806	0.696	0.144	4.845	1.2659e-06	7.958e-05	up	CYB5A	cytochrome b5 type A [Source:HGNC Symbol;Acc:HGNC:2570]	18	74250847	74292016	q22.3	-1
ENSG00000010219	394.445	0.8	0.17	4.707	2.5101e-06	0.0001455	up	DYRK4	dual specificity tyrosine phosphorylation regulated kinase 4 [Source:HGNC Symbol;Acc:HGNC:3095]	12	4562204	4615302	p13.32	1
ENSG00000156675	1273.56	0.459	0.098	4.7	2.6046e-06	0.0001485	up	RAB11FIP1	RAB11 family interacting protein 1 [Source:HGNC Symbol;Acc:HGNC:30265]	8	37858618	37899467	p11.23	-1
ENSG00000110002	1570.97	0.526	0.112	4.697	2.63953e-06	0.0001488	up	VWA5A	von Willebrand factor A domain containing 5A [Source:HGNC Symbol;Acc:HGNC:6658]	11	124115362	124147721	q24.2	1
ENSG00000105612	846.83	0.857	0.183	4.69	2.73705e-06	0.0001517	up	DNASE2	deoxyribonuclease 2, lysosomal [Source:HGNC Symbol;Acc:HGNC:2960]	19	12875211	12881468	p13.13	-1
ENSG00000136710	972.165	0.486	0.104	4.687	2.77816e-06	0.0001532	up	CCDC115	coiled-coil domain containing 115 [Source:HGNC Symbol;Acc:HGNC:28178]	2	130338241	130342349	q21.1	-1
ENSG00000177628	1017.17	0.766	0.164	4.667	3.05539e-06	0.0001631	up	GBA	glucosylceramidase beta [Source:HGNC Symbol;Acc:HGNC:4177]	1	155234452	155244699	q22	-1
ENSG00000169495	2426.94	0.382	0.082	4.663	3.11019e-06	0.0001652	up	HTRA4	HtrA serine peptidase 4 [Source:HGNC Symbol;Acc:HGNC:26909]	8	38974164	38988662	p11.22	1
ENSG00000069812	179.048	1.404	0.303	4.634	3.58977e-06	0.000187	up	HES2	hes family bHLH transcription factor 2 [Source:HGNC Symbol;Acc:HGNC:16005]	1	6412418	6424670	p36.31	-1
ENSG00000105928	1917.37	0.457	0.099	4.63	3.65903e-06	0.0001894	up	GSDME	gasdermin E [Source:HGNC Symbol;Acc:HGNC:2810]	7	24698351	24758113	p15.3	-1
ENSG00000115594	640.536	0.614	0.133	4.62	3.8339e-06	0.000195	up	IL1R1	interleukin 1 receptor type 1 [Source:HGNC Symbol;Acc:HGNC:5993]	2	102064544	102179874	q11.2	1
ENSG00000110446	597.847	1.194	0.26	4.59	4.43942e-06	0.0002176	up	SLC15A3	solute carrier family 15 member 3 [Source:HGNC Symbol;Acc:HGNC:18068]	11	60937084	60952530	q12.2	-1
ENSG00000178719	239.141	1.806	0.394	4.579	4.66236e-06	0.0002274	up	GRINA	glutamate ionotropic receptor NMDA type subunit associated protein 1 [Source:HGNC Symbol;Acc:HGNC:4589]	8	143990058	143993415	q24.3	1
ENSG00000158683	262.746	1	0.219	4.566	4.97302e-06	0.0002414	up	PKD1L1	polycystin 1 like 1, transient receptor potential channel interacting [Source:HGNC Symbol;Acc:HGNC:18053]	7	47774652	47948491	p12.3	-1
ENSG00000160285	198.613	1.281	0.281	4.562	5.06953e-06	0.0002449	up	LSS	lanosterol synthase [Source:HGNC Symbol;Acc:HGNC:6708]	21	46188141	46228824	q22.3	-1
ENSG00000164604	92.433	1.512	0.332	4.559	5.1467e-06	0.0002474	up	GPR85	G protein-coupled receptor 85 [Source:HGNC Symbol;Acc:HGNC:4536]	7	113078331	113087778	q31.1	-1
ENSG00000242498	732.646	0.512	0.113	4.531	5.86976e-06	0.0002757	up	ARPIN	actin related protein 2/3 complex inhibitor [Source:HGNC Symbol;Acc:HGNC:28782]	15	89895006	89912956	q26.1	-1
ENSG00000179918	1212.51	0.775	0.172	4.498	6.84905e-06	0.0003187	up	SEPHS2	selenophosphate synthetase 2 [Source:HGNC Symbol;Acc:HGNC:19686]	16	30443631	30446181	p11.2	-1
ENSG00000179593	164.814	1.304	0.29	4.497	6.88213e-06	0.0003188	up	ALOX15B	arachidonate 15-lipoxygenase, type B [Source:HGNC Symbol;Acc:HGNC:434]	17	8039017	8049134	p13.1	1
ENSG00000100523	1572.7	0.499	0.111	4.477	7.56778e-06	0.0003428	up	DDHD1	DDHD domain containing 1 [Source:HGNC Symbol;Acc:HGNC:19714]	14	53036745	53153282	q22.1	-1
ENSG00000150977	847.744	0.648	0.145	4.464	8.05208e-06	0.0003582	up	RILPL2	Rab interacting lysosomal protein like 2 [Source:HGNC Symbol;Acc:HGNC:28787]	12	123410683	123436717	q24.31	-1
ENSG00000176788	1857.46	0.466	0.105	4.439	9.05485e-06	0.0003929	up	BASP1	brain abundant membrane attached signal protein 1 [Source:HGNC Symbol;Acc:HGNC:957]	5	17065598	17276843	p15.1	1
ENSG00000114770	985.461	0.527	0.119	4.408	1.04273e-05	0.0004463	up	ABCC5	ATP binding cassette subfamily C member 5 [Source:HGNC Symbol;Acc:HGNC:56]	3	183919934	184018015	q27.1	-1
ENSG00000133612	149.217	0.981	0.224	4.39	1.13415e-05	0.0004794	up	AGAP3	ArfGAP with GTPase domain, ankyrin repeat and PH domain 3 [Source:HGNC Symbol;Acc:HGNC:16923]	7	151085831	151144436	q36.1	1
ENSG00000049246	999.934	0.48	0.109	4.385	1.15911e-05	0.0004859	up	PER3	period circadian regulator 3 [Source:HGNC Symbol;Acc:HGNC:8847]	1	7784320	7845177	p36.23	1
ENSG00000161011	401.603	1.212	0.277	4.372	1.23204e-05	0.000508	up	SQSTM1	sequestosome 1 [Source:HGNC Symbol;Acc:HGNC:11280]	5	179806398	179838078	q35.3	1
ENSG00000042286	123.301	1.248	0.287	4.349	1.36847e-05	0.0005531	up	AIFM2	apoptosis inducing factor, mitochondria associated 2 [Source:HGNC Symbol;Acc:HGNC:21411]	10	70098223	70132934	q22.1	-1
ENSG00000204525	3135.53	0.84	0.194	4.337	1.44681e-05	0.0005755	up	HLA-C	major histocompatibility complex, class I, C [Source:HGNC Symbol;Acc:HGNC:4933]	6	31268749	31272130	p21.33	-1
ENSG00000135596	282.258	1.255	0.29	4.335	1.45734e-05	0.0005775	up	MICAL1	microtubule associated monooxygenase, calponin and LIM domain containing 1 [Source:HGNC Symbol;Acc:HGNC:20619]	6	109444062	109465968	q21	-1
ENSG00000166387	299.034	0.891	0.206	4.334	1.46687e-05	0.000578	up	PPFIBP2	PPFIA binding protein 2 [Source:HGNC Symbol;Acc:HGNC:9250]	11	7513298	7657127	p15.4	1
ENSG00000163686	211.917	0.88	0.204	4.321	1.55298e-05	0.0006013	up	ABHD6	abhydrolase domain containing 6 [Source:HGNC Symbol;Acc:HGNC:21398]	3	58237506	58295693	p14.3	1
ENSG00000159348	788.856	0.682	0.158	4.314	1.60183e-05	0.0006155	up	CYB5R1	cytochrome b5 reductase 1 [Source:HGNC Symbol;Acc:HGNC:13397]	1	202961869	202967280	q32.1	-1
ENSG00000198502	899.42	1.143	0.265	4.314	1.60186e-05	0.0006155	up	HLA-DRB5	major histocompatibility complex, class II, DR beta 5 [Source:HGNC Symbol;Acc:HGNC:4953]	6	32517343	32530287	p21.32	-1
ENSG00000071242	388.696	0.674	0.157	4.297	1.7347e-05	0.0006562	up	RPS6KA2	ribosomal protein S6 kinase A2 [Source:HGNC Symbol;Acc:HGNC:10431]	6	166409364	166906451	q27	-1
ENSG00000130203	124.723	1.483	0.345	4.296	1.74008e-05	0.0006562	up	APOE	apolipoprotein E [Source:HGNC Symbol;Acc:HGNC:613]	19	44905754	44909393	q13.32	1
ENSG00000164713	408.471	1.285	0.301	4.275	1.9088e-05	0.0007041	up	BRI3	brain protein I3 [Source:HGNC Symbol;Acc:HGNC:1109]	7	98252379	98310441	q21.3	1
ENSG00000112096	68443.2	0.425	0.1	4.257	2.06762e-05	0.0007489	up	SOD2	superoxide dismutase 2 [Source:HGNC Symbol;Acc:HGNC:11180]	6	159669057	159745186	q25.3	-1
ENSG00000107282	115.726	1.244	0.292	4.257	2.0744e-05	0.0007489	up	APBA1	amyloid beta precursor protein binding family A member 1 [Source:HGNC Symbol;Acc:HGNC:578]	9	69427530	69672306	q21.12	-1
ENSG00000135709	331.828	0.716	0.168	4.255	2.0886e-05	0.0007513	up	KIAA0513	KIAA0513 [Source:HGNC Symbol;Acc:HGNC:29058]	16	85027751	85094230	q24.1	1
ENSG00000170915	864.101	0.515	0.121	4.247	2.16219e-05	0.0007669	up	PAQR8	progestin and adipoQ receptor family member 8 [Source:HGNC Symbol;Acc:HGNC:15708]	6	52361421	52407777	p12.2	1
ENSG00000141084	217.483	0.936	0.221	4.235	2.2856e-05	0.000805	up	RANBP10	RAN binding protein 10 [Source:HGNC Symbol;Acc:HGNC:29285]	16	67723066	67806652	q22.1	-1
ENSG00000135390	275.323	1.582	0.376	4.213	2.52334e-05	0.0008736	up	ATP5MC2	ATP synthase membrane subunit c locus 2 [Source:HGNC Symbol;Acc:HGNC:842]	12	53632726	53677408	q13.13	-1
ENSG00000224137	119.309	1.136	0.271	4.196	2.71394e-05	0.0009146	up	LINC01857	long intergenic non-protein coding RNA 1857 [Source:HGNC Symbol;Acc:HGNC:52673]	2	207662375	207667024	q33.3	1
ENSG00000113552	1830.02	0.465	0.111	4.192	2.76534e-05	0.0009289	up	GNPDA1	glucosamine-6-phosphate deaminase 1 [Source:HGNC Symbol;Acc:HGNC:4417]	5	141991749	142013041	q31.3	-1
ENSG00000100600	3216.78	0.602	0.144	4.168	3.07326e-05	0.0009992	up	LGMN	legumain [Source:HGNC Symbol;Acc:HGNC:9472]	14	92703807	92748702	q32.12	-1
ENSG00000157191	1213.64	0.523	0.126	4.165	3.11584e-05	0.00101	up	NECAP2	NECAP endocytosis associated 2 [Source:HGNC Symbol;Acc:HGNC:25528]	1	16440672	16460078	p36.13	1
ENSG00000197043	666.332	0.886	0.213	4.148	3.34898e-05	0.001075	up	ANXA6	annexin A6 [Source:HGNC Symbol;Acc:HGNC:544]	5	151100712	151157882	q33.1	-1
ENSG00000107521	252.308	1.176	0.284	4.147	3.3655e-05	0.001077	up	HPS1	HPS1, biogenesis of lysosomal organelles complex 3 subunit 1 [Source:HGNC Symbol;Acc:HGNC:5163]	10	98416198	98446947	q24.2	-1
ENSG00000151117	215.671	0.946	0.23	4.111	3.93525e-05	0.001244	up	TMEM86A	transmembrane protein 86A [Source:HGNC Symbol;Acc:HGNC:26890]	11	18693122	18704785	p15.1	1
ENSG00000125633	2582.85	0.328	0.08	4.098	4.16883e-05	0.001291	up	CCDC93	coiled-coil domain containing 93 [Source:HGNC Symbol;Acc:HGNC:25611]	2	117915478	118014133	q14.1	-1
ENSG00000120885	2818.81	0.521	0.127	4.098	4.15975e-05	0.001291	up	CLU	clusterin [Source:HGNC Symbol;Acc:HGNC:2095]	8	27596917	27615031	p21.1	-1
ENSG00000126561	424.188	0.871	0.213	4.096	4.202e-05	0.001296	up	STAT5A	signal transducer and activator of transcription 5A [Source:HGNC Symbol;Acc:HGNC:11366]	17	42287547	42311943	q21.2	1
ENSG00000178927	106.52	1.174	0.287	4.094	4.24405e-05	0.001305	up	C17orf62	chromosome 17 open reading frame 62 [Source:HGNC Symbol;Acc:HGNC:28672]	17	82442589	82450829	q25.3	-1
ENSG00000141458	4146.48	0.405	0.1	4.051	5.09144e-05	0.001501	up	NPC1	NPC intracellular cholesterol transporter 1 [Source:HGNC Symbol;Acc:HGNC:7897]	18	23506184	23586898	q11.2	-1
ENSG00000124145	1617.85	0.47	0.116	4.048	5.15693e-05	0.001508	up	SDC4	syndecan 4 [Source:HGNC Symbol;Acc:HGNC:10661]	20	45325288	45348424	q13.12	-1
ENSG00000142185	34.409	2.095	0.518	4.042	5.30545e-05	0.001538	up	TRPM2	transient receptor potential cation channel subfamily M member 2 [Source:HGNC Symbol;Acc:HGNC:12339]	21	44350163	44443081	q22.3	1
ENSG00000064601	775.24	0.687	0.172	4.002	6.2871e-05	0.001743	up	CTSA	cathepsin A [Source:HGNC Symbol;Acc:HGNC:9251]	20	45890144	45898820	q13.12	1
ENSG00000119866	298.436	0.708	0.177	4.002	6.28246e-05	0.001743	up	BCL11A	B cell CLL/lymphoma 11A [Source:HGNC Symbol;Acc:HGNC:13221]	2	60450520	60555154	p16.1	-1
ENSG00000120457	154.54	1.272	0.318	3.997	6.41797e-05	0.001769	up	KCNJ5	potassium voltage-gated channel subfamily J member 5 [Source:HGNC Symbol;Acc:HGNC:6266]	11	128891356	128921035	q24.3	1
ENSG00000137193	1255.27	0.406	0.102	3.989	6.62617e-05	0.001819	up	PIM1	Pim-1 proto-oncogene, serine/threonine kinase [Source:HGNC Symbol;Acc:HGNC:8986]	6	37170203	37175426	p21.2	1
ENSG00000180304	1292.02	0.611	0.153	3.981	6.8723e-05	0.001869	up	OAZ2	ornithine decarboxylase antizyme 2 [Source:HGNC Symbol;Acc:HGNC:8096]	15	64687573	64703281	q22.31	-1
ENSG00000142657	4139.4	0.753	0.189	3.979	6.91573e-05	0.001873	up	PGD	phosphogluconate dehydrogenase [Source:HGNC Symbol;Acc:HGNC:8891]	1	10398592	10420144	p36.22	1
ENSG00000171051	142.245	1.355	0.341	3.976	7.02052e-05	0.001894	up	FPR1	formyl peptide receptor 1 [Source:HGNC Symbol;Acc:HGNC:3826]	19	51745172	51804110	q13.41	-1
ENSG00000196126	3490.34	0.761	0.192	3.963	7.4034e-05	0.001966	up	HLA-DRB1	major histocompatibility complex, class II, DR beta 1 [Source:HGNC Symbol;Acc:HGNC:4948]	6	32578769	32589848	p21.32	-1
ENSG00000186074	809.09	0.541	0.137	3.959	7.52131e-05	0.001971	up	CD300LF	CD300 molecule like family member f [Source:HGNC Symbol;Acc:HGNC:29883]	17	74694311	74712978	q25.1	-1
ENSG00000167468	110.607	1.946	0.491	3.96	7.48239e-05	0.001971	up	GPX4	glutathione peroxidase 4 [Source:HGNC Symbol;Acc:HGNC:4556]	19	1103926	1106791	p13.3	1
ENSG00000159461	2294.24	0.49	0.124	3.958	7.57333e-05	0.001975	up	AMFR	autocrine motility factor receptor [Source:HGNC Symbol;Acc:HGNC:463]	16	56361452	56425538	q13	-1
ENSG00000100889	235.087	1.163	0.296	3.934	8.36097e-05	0.002105	up	PCK2	phosphoenolpyruvate carboxykinase 2, mitochondrial [Source:HGNC Symbol;Acc:HGNC:8725]	14	24094053	24110598	q11.2	1
ENSG00000242574	3182.48	0.396	0.101	3.93	8.50963e-05	0.002126	up	HLA-DMB	major histocompatibility complex, class II, DM beta [Source:HGNC Symbol;Acc:HGNC:4935]	6	32934629	32941070	p21.32	-1
ENSG00000138031	470.267	0.763	0.194	3.93	8.48769e-05	0.002126	up	ADCY3	adenylate cyclase 3 [Source:HGNC Symbol;Acc:HGNC:234]	2	24819169	24919839	p23.3	-1
ENSG00000106683	204.735	1.519	0.387	3.93	8.50564e-05	0.002126	up	LIMK1	LIM domain kinase 1 [Source:HGNC Symbol;Acc:HGNC:6613]	7	74082933	74122525	q11.23	1
ENSG00000089351	99.482	1.491	0.38	3.928	8.57349e-05	0.002137	up	GRAMD1A	GRAM domain containing 1A [Source:HGNC Symbol;Acc:HGNC:29305]	19	34994784	35026471	q13.11	1
ENSG00000117115	521.031	0.862	0.22	3.923	8.73462e-05	0.002156	up	PADI2	peptidyl arginine deiminase 2 [Source:HGNC Symbol;Acc:HGNC:18341]	1	17066761	17119435	p36.13	-1
ENSG00000153786	1152.82	0.499	0.128	3.905	9.43968e-05	0.00228	up	ZDHHC7	zinc finger DHHC-type containing 7 [Source:HGNC Symbol;Acc:HGNC:18459]	16	84974181	85011535	q24.1	-1
ENSG00000112137	203.666	0.883	0.227	3.895	9.82235e-05	0.002352	up	PHACTR1	phosphatase and actin regulator 1 [Source:HGNC Symbol;Acc:HGNC:20990]	6	12716805	13290484	p24.1	1
ENSG00000235568	295.857	0.831	0.214	3.893	9.91218e-05	0.002361	up	NFAM1	NFAT activating protein with ITAM motif 1 [Source:HGNC Symbol;Acc:HGNC:29872]	22	42380410	42432395	q13.2	-1
ENSG00000118762	1168.83	0.452	0.116	3.884	0.000102658	0.002427	up	PKD2	polycystin 2, transient receptor potential cation channel [Source:HGNC Symbol;Acc:HGNC:9009]	4	88007668	88077777	q22.1	1
ENSG00000172890	263.796	0.709	0.183	3.872	0.000107933	0.002534	up	NADSYN1	NAD synthetase 1 [Source:HGNC Symbol;Acc:HGNC:29832]	11	71453109	71524107	q13.4	1
ENSG00000165025	3091.42	0.494	0.128	3.857	0.000114765	0.00267	up	SYK	spleen associated tyrosine kinase [Source:HGNC Symbol;Acc:HGNC:11491]	9	90801787	90898549	q22.2	1
ENSG00000117448	2056.78	0.696	0.181	3.851	0.000117648	0.002718	up	AKR1A1	aldo-keto reductase family 1 member A1 [Source:HGNC Symbol;Acc:HGNC:380]	1	45550543	45570049	p34.1	1
ENSG00000117410	894.539	0.902	0.234	3.852	0.000117389	0.002718	up	ATP6V0B	ATPase H+ transporting V0 subunit b [Source:HGNC Symbol;Acc:HGNC:861]	1	43974487	43978295	p34.1	1
ENSG00000090861	681.688	0.755	0.196	3.848	0.000119001	0.002744	up	AARS	alanyl-tRNA synthetase [Source:HGNC Symbol;Acc:HGNC:20]	16	70252295	70289543	q22.1	-1
ENSG00000198814	1693.84	0.442	0.115	3.832	0.000126878	0.002905	up	GK	glycerol kinase [Source:HGNC Symbol;Acc:HGNC:4289]	X	30653359	30731456	p21.2	1
ENSG00000185215	921.407	0.883	0.231	3.823	0.000131784	0.002964	up	TNFAIP2	TNF alpha induced protein 2 [Source:HGNC Symbol;Acc:HGNC:11895]	14	103123442	103137439	q32.32	1
ENSG00000126088	149.27	1.218	0.319	3.817	0.000135101	0.003012	up	UROD	uroporphyrinogen decarboxylase [Source:HGNC Symbol;Acc:HGNC:12591]	1	45012147	45015575	p34.1	1
ENSG00000198223	582.888	0.528	0.138	3.813	0.000137355	0.003049	up	CSF2RA	colony stimulating factor 2 receptor alpha subunit [Source:HGNC Symbol;Acc:HGNC:2435]	X	1268800	1310381	p22.33	1
ENSG00000100083	186.28	0.875	0.23	3.807	0.000140848	0.003106	up	GGA1	golgi associated, gamma adaptin ear containing, ARF binding protein 1 [Source:HGNC Symbol;Acc:HGNC:17842]	22	37608475	37633564	q13.1	1
ENSG00000175538	681.276	0.51	0.134	3.805	0.000141627	0.003116	up	KCNE3	potassium voltage-gated channel subfamily E regulatory subunit 3 [Source:HGNC Symbol;Acc:HGNC:6243]	11	74454841	74467729	q13.4	-1
ENSG00000100100	146.887	1.062	0.279	3.802	0.000143571	0.003139	up	PIK3IP1	phosphoinositide-3-kinase interacting protein 1 [Source:HGNC Symbol;Acc:HGNC:24942]	22	31281593	31292534	q12.2	-1
ENSG00000161016	86.64	2.065	0.548	3.769	0.00016421	0.003485	up	RPL8	ribosomal protein L8 [Source:HGNC Symbol;Acc:HGNC:10368]	8	144789765	144792587	q24.3	-1
ENSG00000185909	47.178	1.672	0.444	3.762	0.000168639	0.003556	up	KLHDC8B	kelch domain containing 8B [Source:HGNC Symbol;Acc:HGNC:28557]	3	49171611	49176486	p21.31	1
ENSG00000133935	358.47	0.63	0.169	3.728	0.000193036	0.003972	up	ERG28	ergosterol biosynthesis 28 homolog [Source:HGNC Symbol;Acc:HGNC:1187]	14	75649791	75661189	q24.3	-1
ENSG00000132694	1281.86	0.39	0.105	3.727	0.00019404	0.003984	up	ARHGEF11	Rho guanine nucleotide exchange factor 11 [Source:HGNC Symbol;Acc:HGNC:14580]	1	156934840	157045370	q23.1	-1
ENSG00000149532	803.317	0.414	0.112	3.709	0.000208338	0.004252	up	CPSF7	cleavage and polyadenylation specific factor 7 [Source:HGNC Symbol;Acc:HGNC:30098]	11	61402641	61430031	q12.2	-1
ENSG00000101439	172.862	1.084	0.292	3.707	0.000209527	0.004263	up	CST3	cystatin C [Source:HGNC Symbol;Acc:HGNC:2475]	20	23626706	23638473	p11.21	-1
ENSG00000090020	147.411	0.99	0.268	3.697	0.000218417	0.004396	up	SLC9A1	solute carrier family 9 member A1 [Source:HGNC Symbol;Acc:HGNC:11071]	1	27098815	27166981	p36.11	-1
ENSG00000179344	491.684	0.531	0.144	3.695	0.00022015	0.004422	up	HLA-DQB1	major histocompatibility complex, class II, DQ beta 1 [Source:HGNC Symbol;Acc:HGNC:4944]	6	32659467	32668383	p21.32	-1
ENSG00000196547	107.608	1.103	0.299	3.686	0.000228189	0.004548	up	MAN2A2	mannosidase alpha class 2A member 2 [Source:HGNC Symbol;Acc:HGNC:6825]	15	90902218	90922584	q26.1	1
ENSG00000142784	90.674	1.247	0.338	3.686	0.00022789	0.004548	up	WDTC1	WD and tetratricopeptide repeats 1 [Source:HGNC Symbol;Acc:HGNC:29175]	1	27234516	27308633	p36.11	1
ENSG00000165474	1755.73	0.4	0.109	3.682	0.000231829	0.004587	up	GJB2	gap junction protein beta 2 [Source:HGNC Symbol;Acc:HGNC:4284]	13	20187463	20193010	q12.11	-1
ENSG00000108219	823.166	0.532	0.145	3.681	0.000232417	0.004587	up	TSPAN14	tetraspanin 14 [Source:HGNC Symbol;Acc:HGNC:23303]	10	80454166	80533123	q23.1	1
ENSG00000204161	772.773	0.542	0.147	3.68	0.000233299	0.004595	up	C10orf128	chromosome 10 open reading frame 128 [Source:HGNC Symbol;Acc:HGNC:27274]	10	49154725	49188585	q11.23	-1
ENSG00000111653	133.772	0.929	0.253	3.679	0.000234124	0.004603	up	ING4	inhibitor of growth family member 4 [Source:HGNC Symbol;Acc:HGNC:19423]	12	6650280	6663148	p13.31	-1
ENSG00000131355	393.947	0.643	0.175	3.675	0.00023759	0.004662	up	ADGRE3	adhesion G protein-coupled receptor E3 [Source:HGNC Symbol;Acc:HGNC:23647]	19	14619117	14690027	p13.12	-1
ENSG00000013523	1018.6	0.56	0.152	3.674	0.000238883	0.004669	up	ANGEL1	angel homolog 1 [Source:HGNC Symbol;Acc:HGNC:19961]	14	76786178	76826246	q24.3	-1
ENSG00000134107	3280.02	0.429	0.117	3.669	0.000243372	0.004729	up	BHLHE40	basic helix-loop-helix family member e40 [Source:HGNC Symbol;Acc:HGNC:1046]	3	4979116	4985323	p26.1	1
ENSG00000185567	269.295	0.682	0.186	3.67	0.000242884	0.004729	up	AHNAK2	AHNAK nucleoprotein 2 [Source:HGNC Symbol;Acc:HGNC:20125]	14	104937244	104978357	q32.33	-1
ENSG00000100099	419.294	0.533	0.146	3.663	0.000249111	0.004805	up	HPS4	HPS4, biogenesis of lysosomal organelles complex 3 subunit 2 [Source:HGNC Symbol;Acc:HGNC:15844]	22	26443423	26483837	q12.1	-1
ENSG00000177000	304.791	0.647	0.177	3.648	0.000264275	0.005039	up	MTHFR	methylenetetrahydrofolate reductase [Source:HGNC Symbol;Acc:HGNC:7436]	1	11785723	11806920	p36.22	-1
ENSG00000132792	660.655	0.575	0.158	3.642	0.000270192	0.005104	up	CTNNBL1	catenin beta like 1 [Source:HGNC Symbol;Acc:HGNC:15879]	20	37693955	37872129	q11.23	1
ENSG00000172578	5152.73	0.293	0.08	3.64	0.000272463	0.005128	up	KLHL6	kelch like family member 6 [Source:HGNC Symbol;Acc:HGNC:18653]	3	183487531	183555689	q27.1	-1
ENSG00000117091	1296.7	0.426	0.117	3.635	0.000277987	0.005214	up	CD48	CD48 molecule [Source:HGNC Symbol;Acc:HGNC:1683]	1	160678746	160711851	q23.3	-1
ENSG00000198203	1324.83	0.44	0.121	3.634	0.000278607	0.005214	up	SULT1C2	sulfotransferase family 1C member 2 [Source:HGNC Symbol;Acc:HGNC:11456]	2	108288639	108309915	q12.3	1
ENSG00000109066	113.769	1.138	0.315	3.619	0.000295221	0.005465	up	TMEM104	transmembrane protein 104 [Source:HGNC Symbol;Acc:HGNC:25984]	17	74776483	74839779	q25.1	1
ENSG00000131143	657.371	0.808	0.223	3.616	0.000299083	0.005506	up	COX4I1	cytochrome c oxidase subunit 4I1 [Source:HGNC Symbol;Acc:HGNC:2265]	16	85798633	85807044	q24.1	1
ENSG00000172893	63.472	1.517	0.421	3.606	0.00031138	0.00566	up	DHCR7	7-dehydrocholesterol reductase [Source:HGNC Symbol;Acc:HGNC:2860]	11	71428193	71452868	q13.4	-1
ENSG00000065029	54.417	1.483	0.412	3.603	0.000314898	0.005694	up	ZNF76	zinc finger protein 76 [Source:HGNC Symbol;Acc:HGNC:13149]	6	35258909	35295985	p21.31	1
ENSG00000082641	1561.8	0.452	0.126	3.588	0.000333587	0.005943	up	NFE2L1	nuclear factor, erythroid 2 like 1 [Source:HGNC Symbol;Acc:HGNC:7781]	17	48048329	48061487	q21.32	1
ENSG00000159346	3063.51	0.375	0.105	3.58	0.000343363	0.006062	up	ADIPOR1	adiponectin receptor 1 [Source:HGNC Symbol;Acc:HGNC:24040]	1	202940823	202958572	q32.1	-1
ENSG00000186635	734.132	0.648	0.182	3.567	0.000361005	0.006301	up	ARAP1	ArfGAP with RhoGAP domain, ankyrin repeat and PH domain 1 [Source:HGNC Symbol;Acc:HGNC:16925]	11	72685069	72793599	q13.4	-1
ENSG00000105281	107.647	1.198	0.336	3.567	0.00036151	0.006301	up	SLC1A5	solute carrier family 1 member 5 [Source:HGNC Symbol;Acc:HGNC:10943]	19	46774883	46788594	q13.32	-1
ENSG00000095383	386.977	0.802	0.225	3.558	0.000372985	0.006435	up	TBC1D2	TBC1 domain family member 2 [Source:HGNC Symbol;Acc:HGNC:18026]	9	98198999	98255721	q22.33	-1
ENSG00000198624	539.061	0.582	0.164	3.551	0.000384005	0.006569	up	CCDC69	coiled-coil domain containing 69 [Source:HGNC Symbol;Acc:HGNC:24487]	5	151181052	151224145	q33.1	-1
ENSG00000109323	2440.02	0.265	0.075	3.55	0.000384863	0.006572	up	MANBA	mannosidase beta [Source:HGNC Symbol;Acc:HGNC:6831]	4	102630770	102760994	q24	-1
ENSG00000121797	1848.24	0.36	0.102	3.539	0.000402164	0.006833	up	CCRL2	C-C motif chemokine receptor like 2 [Source:HGNC Symbol;Acc:HGNC:1612]	3	46407163	46412997	p21.31	1
ENSG00000165782	239.888	0.729	0.206	3.536	0.000406702	0.006876	up	PIP4P1	phosphatidylinositol-4,5-bisphosphate 4-phosphatase 1 [Source:HGNC Symbol;Acc:HGNC:19299]	14	20457719	20461612	q11.2	-1
ENSG00000145335	102.488	1.099	0.311	3.535	0.000408383	0.006893	up	SNCA	synuclein alpha [Source:HGNC Symbol;Acc:HGNC:11138]	4	89724099	89838315	q22.1	-1
ENSG00000160932	52.414	1.969	0.558	3.529	0.000417517	0.006995	up	LY6E	lymphocyte antigen 6 family member E [Source:HGNC Symbol;Acc:HGNC:6727]	8	143017982	143023832	q24.3	1
ENSG00000143507	486.732	0.5	0.142	3.523	0.000426261	0.007094	up	DUSP10	dual specificity phosphatase 10 [Source:HGNC Symbol;Acc:HGNC:3065]	1	221701424	221742176	q41	-1
ENSG00000070540	614.209	0.69	0.196	3.518	0.00043499	0.00721	up	WIPI1	WD repeat domain, phosphoinositide interacting 1 [Source:HGNC Symbol;Acc:HGNC:25471]	17	68420948	68457513	q24.2	-1
ENSG00000156414	1483.34	0.368	0.105	3.516	0.000438314	0.007253	up	TDRD9	tudor domain containing 9 [Source:HGNC Symbol;Acc:HGNC:20122]	14	103928462	104052667	q32.33	1
ENSG00000204386	915.683	0.664	0.189	3.515	0.000440048	0.007258	up	NEU1	neuraminidase 1 [Source:HGNC Symbol;Acc:HGNC:7758]	6	31857659	31862906	p21.33	-1
ENSG00000108639	53.658	1.571	0.448	3.504	0.000458227	0.007497	up	SYNGR2	synaptogyrin 2 [Source:HGNC Symbol;Acc:HGNC:11499]	17	78168558	78173527	q25.3	1
ENSG00000107593	142.094	1.072	0.306	3.503	0.000459397	0.007504	up	PKD2L1	polycystin 2 like 1, transient receptor potential cation channel [Source:HGNC Symbol;Acc:HGNC:9011]	10	100288154	100330486	q24.31	-1
ENSG00000137491	1493.12	0.475	0.136	3.498	0.000468142	0.007623	up	SLCO2B1	solute carrier organic anion transporter family member 2B1 [Source:HGNC Symbol;Acc:HGNC:10962]	11	75100563	75206549	q13.4	1
ENSG00000187554	185.06	0.914	0.261	3.497	0.000470468	0.007636	up	TLR5	toll like receptor 5 [Source:HGNC Symbol;Acc:HGNC:11851]	1	223109406	223143282	q41	-1
ENSG00000229117	594.265	0.962	0.275	3.49	0.000482184	0.007776	up	RPL41	ribosomal protein L41 [Source:HGNC Symbol;Acc:HGNC:10354]	12	56116586	56117943	q13.2	1
ENSG00000160255	2716.01	0.618	0.177	3.489	0.000485119	0.007811	up	ITGB2	integrin subunit beta 2 [Source:HGNC Symbol;Acc:HGNC:6155]	21	44885953	44931989	q22.3	-1
ENSG00000087152	219.336	0.724	0.208	3.487	0.000487758	0.007841	up	ATXN7L3	ataxin 7 like 3 [Source:HGNC Symbol;Acc:HGNC:25416]	17	44191805	44200113	q21.31	-1
ENSG00000161642	85.65	1.546	0.444	3.482	0.000498431	0.007981	up	ZNF385A	zinc finger protein 385A [Source:HGNC Symbol;Acc:HGNC:17521]	12	54369133	54391298	q13.13	-1
ENSG00000007237	1555.18	0.433	0.125	3.478	0.00050597	0.008045	up	GAS7	growth arrest specific 7 [Source:HGNC Symbol;Acc:HGNC:4169]	17	9910609	10198551	p13.1	-1
ENSG00000140678	4448.42	0.521	0.15	3.475	0.000511687	0.00811	up	ITGAX	integrin subunit alpha X [Source:HGNC Symbol;Acc:HGNC:6152]	16	31355134	31382997	p11.2	1
ENSG00000188060	373.534	0.614	0.177	3.471	0.000517695	0.008167	up	RAB42	RAB42, member RAS oncogene family [Source:HGNC Symbol;Acc:HGNC:28702]	1	28592200	28595443	p35.3	1
ENSG00000144567	763.125	0.485	0.14	3.458	0.000543744	0.008499	up	RETREG2	reticulophagy regulator family member 2 [Source:HGNC Symbol;Acc:HGNC:28450]	2	219176225	219185479	q35	1
ENSG00000253522	1497.82	0.34	0.098	3.457	0.000545497	0.0085	up	MIR3142HG	MIR3142 host gene [Source:HGNC Symbol;Acc:HGNC:51944]	5	160438594	160487426	q33.3	1
ENSG00000177156	1050.5	0.843	0.244	3.451	0.000557804	0.008665	up	TALDO1	transaldolase 1 [Source:HGNC Symbol;Acc:HGNC:11559]	11	747329	765024	p15.5	1
ENSG00000158270	1580.98	0.47	0.136	3.445	0.000570322	0.008779	up	COLEC12	collectin subfamily member 12 [Source:HGNC Symbol;Acc:HGNC:16016]	18	316740	500722	p11.32	-1
ENSG00000104894	216.868	1.315	0.382	3.445	0.000571594	0.008785	up	CD37	CD37 molecule [Source:HGNC Symbol;Acc:HGNC:1666]	19	49335171	49343335	q13.33	1
ENSG00000116729	211.842	0.914	0.266	3.442	0.00057762	0.008838	up	WLS	wntless Wnt ligand secretion mediator [Source:HGNC Symbol;Acc:HGNC:30238]	1	68098473	68233120	p31.3	-1
ENSG00000197355	139.662	0.969	0.281	3.442	0.000577589	0.008838	up	UAP1L1	UDP-N-acetylglucosamine pyrophosphorylase 1 like 1 [Source:HGNC Symbol;Acc:HGNC:28082]	9	137077501	137084539	q34.3	1
ENSG00000059804	1560.38	0.491	0.143	3.441	0.00057911	0.008844	up	SLC2A3	solute carrier family 2 member 3 [Source:HGNC Symbol;Acc:HGNC:11007]	12	7919230	7936275	p13.31	-1
ENSG00000169217	124.056	1.387	0.404	3.435	0.000593304	0.008996	up	CD2BP2	CD2 cytoplasmic tail binding protein 2 [Source:HGNC Symbol;Acc:HGNC:1656]	16	30350766	30355361	p11.2	-1
ENSG00000084652	877.42	0.456	0.133	3.432	0.000598275	0.009058	up	TXLNA	taxilin alpha [Source:HGNC Symbol;Acc:HGNC:30685]	1	32179686	32198285	p35.2	1
ENSG00000104805	100.421	1.665	0.486	3.426	0.000613499	0.009233	up	NUCB1	nucleobindin 1 [Source:HGNC Symbol;Acc:HGNC:8043]	19	48900050	48923372	q13.33	1
ENSG00000197756	1004.21	0.736	0.215	3.421	0.000623013	0.009358	up	RPL37A	ribosomal protein L37a [Source:HGNC Symbol;Acc:HGNC:10348]	2	216498189	216579180	q35	1
ENSG00000072958	95.617	0.964	0.282	3.421	0.000623607	0.009358	up	AP1M1	adaptor related protein complex 1 mu 1 subunit [Source:HGNC Symbol;Acc:HGNC:13667]	19	16197578	16245907	p13.11	1
ENSG00000165406	378.921	0.54	0.158	3.411	0.000648315	0.009629	up	MARCH8	membrane associated ring-CH-type finger 8 [Source:HGNC Symbol;Acc:HGNC:23356]	10	45454585	45594906	q11.22	-1
ENSG00000103502	137.446	0.976	0.286	3.411	0.000648241	0.009629	up	CDIPT	CDP-diacylglycerol--inositol 3-phosphatidyltransferase [Source:HGNC Symbol;Acc:HGNC:1769]	16	29858357	29863736	p11.2	-1
ENSG00000116016	2495.38	0.313	0.092	3.401	0.00067137	0.00987	up	EPAS1	endothelial PAS domain protein 1 [Source:HGNC Symbol;Acc:HGNC:3374]	2	46293667	46386703	p21	1
ENSG00000120899	431.472	0.651	0.192	3.398	0.000678735	0.009941	up	PTK2B	protein tyrosine kinase 2 beta [Source:HGNC Symbol;Acc:HGNC:9612]	8	27311482	27459391	p21.2	1
ENSG00000162894	1044.91	0.594	0.175	3.396	0.000683157	0.009986	up	FCMR	Fc fragment of IgM receptor [Source:HGNC Symbol;Acc:HGNC:14315]	1	206904386	206923247	q32.1	-1
ENSG00000243335	926.831	0.393	0.116	3.395	0.000686133	0.01001	up	KCTD7	potassium channel tetramerization domain containing 7 [Source:HGNC Symbol;Acc:HGNC:21957]	7	66628767	66649067	q11.21	1
ENSG00000135446	193.308	1.207	0.356	3.393	0.000692553	0.01008	up	CDK4	cyclin dependent kinase 4 [Source:HGNC Symbol;Acc:HGNC:1773]	12	57747727	57756013	q14.1	-1
ENSG00000147872	2665.45	0.419	0.124	3.391	0.000695711	0.0101	up	PLIN2	perilipin 2 [Source:HGNC Symbol;Acc:HGNC:248]	9	19108375	19149290	p22.1	-1
ENSG00000112511	85.993	1.07	0.316	3.39	0.000699392	0.01011	up	PHF1	PHD finger protein 1 [Source:HGNC Symbol;Acc:HGNC:8919]	6	33410399	33416453	p21.32	1
ENSG00000164048	1418.77	0.414	0.122	3.385	0.00071139	0.01024	up	ZNF589	zinc finger protein 589 [Source:HGNC Symbol;Acc:HGNC:16747]	3	48241100	48299253	p21.31	1
ENSG00000105568	267.993	1.074	0.317	3.383	0.000716137	0.01028	up	PPP2R1A	protein phosphatase 2 scaffold subunit Aalpha [Source:HGNC Symbol;Acc:HGNC:9302]	19	52190039	52229533	q13.41	1
ENSG00000122515	46.707	1.39	0.411	3.378	0.000729806	0.01042	up	ZMIZ2	zinc finger MIZ-type containing 2 [Source:HGNC Symbol;Acc:HGNC:22229]	7	44748581	44769881	p13	1
ENSG00000157870	407.513	0.538	0.159	3.377	0.000732572	0.01043	up	FAM213B	family with sequence similarity 213 member B [Source:HGNC Symbol;Acc:HGNC:28390]	1	2586491	2591469	p36.32	1
ENSG00000111863	457.669	0.676	0.2	3.377	0.000734041	0.01043	up	ADTRP	androgen dependent TFPI regulating protein [Source:HGNC Symbol;Acc:HGNC:21214]	6	11712054	11807046	p24.1	-1
ENSG00000090376	2099.38	0.329	0.097	3.376	0.000735598	0.01044	up	IRAK3	interleukin 1 receptor associated kinase 3 [Source:HGNC Symbol;Acc:HGNC:17020]	12	66188879	66254622	q14.3	1
ENSG00000130717	128.017	0.828	0.245	3.374	0.000741064	0.0105	up	UCK1	uridine-cytidine kinase 1 [Source:HGNC Symbol;Acc:HGNC:14859]	9	131523801	131531268	q34.13	-1
ENSG00000160271	160.633	1.074	0.319	3.362	0.000772714	0.0109	up	RALGDS	ral guanine nucleotide dissociation stimulator [Source:HGNC Symbol;Acc:HGNC:9842]	9	133097720	133149334	q34.2	-1
ENSG00000158825	53.375	1.715	0.51	3.361	0.000778001	0.01093	up	CDA	cytidine deaminase [Source:HGNC Symbol;Acc:HGNC:1712]	1	20588948	20618908	p36.12	1
ENSG00000197646	568.182	0.52	0.155	3.355	0.000793651	0.01109	up	PDCD1LG2	programmed cell death 1 ligand 2 [Source:HGNC Symbol;Acc:HGNC:18731]	9	5510570	5571254	p24.1	1
ENSG00000173113	73.887	1.087	0.325	3.348	0.000812792	0.01131	up	TRMT112	tRNA methyltransferase subunit 11-2 [Source:HGNC Symbol;Acc:HGNC:26940]	11	64316460	64318084	q13.1	-1
ENSG00000078804	755.23	0.434	0.13	3.346	0.000820214	0.01139	up	TP53INP2	tumor protein p53 inducible nuclear protein 2 [Source:HGNC Symbol;Acc:HGNC:16104]	20	34704290	34713439	q11.22	1
ENSG00000261596	414.063	0.458	0.137	3.343	0.000829227	0.01148	up			16	21626742	21627569	p12.2	1
ENSG00000182544	201.067	0.771	0.231	3.335	0.000853491	0.01173	up	MFSD5	major facilitator superfamily domain containing 5 [Source:HGNC Symbol;Acc:HGNC:28156]	12	53251251	53254405	q13.13	1
ENSG00000127838	339.844	0.873	0.262	3.335	0.000853516	0.01173	up	PNKD	paroxysmal nonkinesigenic dyskinesia [Source:HGNC Symbol;Acc:HGNC:9153]	2	218270392	218346793	q35	1
ENSG00000135686	643.716	0.437	0.131	3.334	0.000855144	0.01174	up	KLHL36	kelch like family member 36 [Source:HGNC Symbol;Acc:HGNC:17844]	16	84648525	84667686	q24.1	1
ENSG00000059377	798.363	0.526	0.158	3.334	0.000857418	0.01175	up	TBXAS1	thromboxane A synthase 1 [Source:HGNC Symbol;Acc:HGNC:11609]	7	139777051	140020325	q34	1
ENSG00000173372	50.575	1.658	0.498	3.332	0.000863763	0.01182	up	C1QA	complement C1q A chain [Source:HGNC Symbol;Acc:HGNC:1241]	1	22636506	22639608	p36.12	1
ENSG00000224397	435.147	0.989	0.298	3.325	0.000884625	0.01203	up	SMIM25	small integral membrane protein 25 [Source:HGNC Symbol;Acc:HGNC:50328]	20	50267486	50279795	q13.13	1
ENSG00000135838	9713.55	0.192	0.058	3.324	0.000887994	0.01206	up	NPL	N-acetylneuraminate pyruvate lyase [Source:HGNC Symbol;Acc:HGNC:16781]	1	182789293	182830384	q25.3	1
ENSG00000223865	1471.06	0.36	0.108	3.323	0.000891351	0.01206	up	HLA-DPB1	major histocompatibility complex, class II, DP beta 1 [Source:HGNC Symbol;Acc:HGNC:4940]	6	33075926	33087201	p21.32	1
ENSG00000071553	3234.9	0.489	0.147	3.323	0.000891765	0.01206	up	ATP6AP1	ATPase H+ transporting accessory protein 1 [Source:HGNC Symbol;Acc:HGNC:868]	X	154428632	154436516	q28	1
ENSG00000167261	42.011	1.579	0.475	3.323	0.000891568	0.01206	up	DPEP2	dipeptidase 2 [Source:HGNC Symbol;Acc:HGNC:23028]	16	67987394	68000586	q22.1	-1
ENSG00000118508	1177.96	0.341	0.103	3.315	0.000917443	0.01234	up	RAB32	RAB32, member RAS oncogene family [Source:HGNC Symbol;Acc:HGNC:9772]	6	146543693	146554965	q24.3	1
ENSG00000103043	525.543	0.785	0.237	3.31	0.000933755	0.01251	up	VAC14	Vac14, PIKFYVE complex component [Source:HGNC Symbol;Acc:HGNC:25507]	16	70687439	70801161	q22.2	-1
ENSG00000125991	435.345	0.933	0.282	3.309	0.000936573	0.01252	up	ERGIC3	ERGIC and golgi 3 [Source:HGNC Symbol;Acc:HGNC:15927]	20	35542021	35557634	q11.22	1
ENSG00000181804	765.826	0.437	0.132	3.303	0.000956133	0.0127	up	SLC9A9	solute carrier family 9 member A9 [Source:HGNC Symbol;Acc:HGNC:20653]	3	143265222	143848531	q24	-1
ENSG00000165959	471.903	0.461	0.14	3.301	0.000961912	0.01275	up	CLMN	calmin [Source:HGNC Symbol;Acc:HGNC:19972]	14	95181940	95319906	q32.13	-1
ENSG00000146094	1261.78	0.336	0.102	3.299	0.000969768	0.01281	up	DOK3	docking protein 3 [Source:HGNC Symbol;Acc:HGNC:24583]	5	177501907	177511274	q35.3	-1
ENSG00000198246	831.982	0.831	0.252	3.298	0.000972641	0.01281	up	SLC29A3	solute carrier family 29 member 3 [Source:HGNC Symbol;Acc:HGNC:23096]	10	71319258	71381423	q22.1	1
ENSG00000168961	263.24	1.256	0.381	3.299	0.000969829	0.01281	up	LGALS9	galectin 9 [Source:HGNC Symbol;Acc:HGNC:6570]	17	27629798	27649560	q11.2	1
ENSG00000241878	131.895	0.948	0.288	3.291	0.00099756	0.01303	up	PISD	phosphatidylserine decarboxylase [Source:HGNC Symbol;Acc:HGNC:8999]	22	31618491	31662432	q12.2	-1
ENSG00000030582	463.305	1.751	0.533	3.288	0.00101072	0.01314	up	GRN	granulin precursor [Source:HGNC Symbol;Acc:HGNC:4601]	17	44345086	44353102	q21.31	1
ENSG00000197894	2451.93	0.259	0.079	3.285	0.00102114	0.01325	up	ADH5	alcohol dehydrogenase 5 (class III), chi polypeptide [Source:HGNC Symbol;Acc:HGNC:253]	4	99070978	99088801	q23	-1
ENSG00000116133	3871.25	0.446	0.136	3.271	0.00107067	0.0137	up	DHCR24	24-dehydrocholesterol reductase [Source:HGNC Symbol;Acc:HGNC:2859]	1	54849633	54887218	p32.3	-1
ENSG00000085063	11146.9	0.22	0.067	3.271	0.00107291	0.01371	up	CD59	CD59 molecule (CD59 blood group) [Source:HGNC Symbol;Acc:HGNC:1689]	11	33703010	33736491	p13	-1
ENSG00000254470	229.301	0.852	0.261	3.261	0.00111048	0.01405	up	AP5B1	adaptor related protein complex 5 beta 1 subunit [Source:HGNC Symbol;Acc:HGNC:25104]	11	65775893	65780802	q13.1	-1
ENSG00000106348	59.729	1.548	0.475	3.259	0.00111927	0.01412	up	IMPDH1	inosine monophosphate dehydrogenase 1 [Source:HGNC Symbol;Acc:HGNC:6052]	7	128392277	128410252	q32.1	-1
ENSG00000140264	144.298	0.793	0.244	3.257	0.00112467	0.01415	up	SERF2	small EDRK-rich factor 2 [Source:HGNC Symbol;Acc:HGNC:10757]	15	43777087	43802589	q15.3	1
ENSG00000146859	515.416	0.698	0.215	3.254	0.00113989	0.01426	up	TMEM140	transmembrane protein 140 [Source:HGNC Symbol;Acc:HGNC:21870]	7	135148072	135166215	q33	1
ENSG00000004399	761.861	0.691	0.213	3.252	0.00114481	0.0143	up	PLXND1	plexin D1 [Source:HGNC Symbol;Acc:HGNC:9107]	3	129555175	129606818	q22.1	-1
ENSG00000158669	1017.87	0.496	0.153	3.248	0.00116398	0.01449	up	GPAT4	glycerol-3-phosphate acyltransferase 4 [Source:HGNC Symbol;Acc:HGNC:20880]	8	41577187	41625001	p11.21	1
ENSG00000100647	2017.11	0.376	0.116	3.243	0.00118444	0.01469	up	SUSD6	sushi domain containing 6 [Source:HGNC Symbol;Acc:HGNC:19956]	14	69611596	69715142	q24.1	1
ENSG00000142494	453.309	0.575	0.177	3.243	0.00118299	0.01469	up	SLC47A1	solute carrier family 47 member 1 [Source:HGNC Symbol;Acc:HGNC:25588]	17	19495385	19579034	p11.2	1
ENSG00000234745	17922.9	0.433	0.134	3.238	0.00120485	0.01485	up	HLA-B	major histocompatibility complex, class I, B [Source:HGNC Symbol;Acc:HGNC:4932]	6	31269491	31357188	p21.33	-1
ENSG00000139832	429.255	0.533	0.165	3.236	0.00121155	0.01488	up	RAB20	RAB20, member RAS oncogene family [Source:HGNC Symbol;Acc:HGNC:18260]	13	110523066	110561733	q34	-1
ENSG00000142227	238.271	1.28	0.396	3.235	0.00121823	0.01494	up	EMP3	epithelial membrane protein 3 [Source:HGNC Symbol;Acc:HGNC:3335]	19	48321509	48330553	q13.33	1
ENSG00000063127	66.14	1.124	0.348	3.228	0.00124457	0.01519	up	SLC6A16	solute carrier family 6 member 16 [Source:HGNC Symbol;Acc:HGNC:13622]	19	49289638	49325225	q13.33	-1
ENSG00000161013	234.766	1.181	0.366	3.227	0.00125128	0.01524	up	MGAT4B	mannosyl (alpha-1,3-)-glycoprotein beta-1,4-N-acetylglucosaminyltransferase, isozyme B [Source:HGNC Symbol;Acc:HGNC:7048]	5	179797597	179806952	q35.3	-1
ENSG00000083290	802.567	0.347	0.108	3.225	0.00126074	0.01531	up	ULK2	unc-51 like autophagy activating kinase 2 [Source:HGNC Symbol;Acc:HGNC:13480]	17	19770829	19867936	p11.2	-1
ENSG00000102096	106.84	0.886	0.275	3.225	0.00125887	0.01531	up	PIM2	Pim-2 proto-oncogene, serine/threonine kinase [Source:HGNC Symbol;Acc:HGNC:8987]	X	48913182	48919024	p11.23	-1
ENSG00000140497	386.601	0.889	0.276	3.219	0.00128688	0.01549	up	SCAMP2	secretory carrier membrane protein 2 [Source:HGNC Symbol;Acc:HGNC:10564]	15	74843730	74873365	q24.1	-1
ENSG00000100365	93.667	1.304	0.406	3.215	0.00130233	0.01563	up	NCF4	neutrophil cytosolic factor 4 [Source:HGNC Symbol;Acc:HGNC:7662]	22	36860988	36878015	q12.3	1
ENSG00000143258	45.211	1.219	0.379	3.214	0.00130932	0.01568	up	USP21	ubiquitin specific peptidase 21 [Source:HGNC Symbol;Acc:HGNC:12620]	1	161159450	161165723	q23.3	1
ENSG00000178952	127.714	1.561	0.487	3.208	0.00133893	0.01592	up	TUFM	Tu translation elongation factor, mitochondrial [Source:HGNC Symbol;Acc:HGNC:12420]	16	28842411	28846408	p11.2	-1
ENSG00000149781	98.429	1.59	0.497	3.202	0.00136512	0.01616	up	FERMT3	fermitin family member 3 [Source:HGNC Symbol;Acc:HGNC:23151]	11	64206678	64223886	q13.1	1
ENSG00000124588	741.797	0.389	0.122	3.191	0.00141885	0.01659	up	NQO2	N-ribosyldihydronicotinamide:quinone reductase 2 [Source:HGNC Symbol;Acc:HGNC:7856]	6	2987987	3028869	p25.2	1
ENSG00000162298	137.936	0.895	0.281	3.19	0.00142107	0.01659	up	SYVN1	synoviolin 1 [Source:HGNC Symbol;Acc:HGNC:20738]	11	65121780	65134533	q13.1	-1
ENSG00000130830	2649.49	0.307	0.096	3.186	0.00144415	0.01676	up	MPP1	membrane palmitoylated protein 1 [Source:HGNC Symbol;Acc:HGNC:7219]	X	154778684	154821007	q28	-1
ENSG00000197122	362.357	0.756	0.238	3.183	0.00145587	0.01686	up	SRC	SRC proto-oncogene, non-receptor tyrosine kinase [Source:HGNC Symbol;Acc:HGNC:11283]	20	37344685	37406050	q11.23	1
ENSG00000229771	400.405	0.712	0.224	3.178	0.00148341	0.01708	up			20	40696499	40698616	q12	-1
ENSG00000112759	318.248	0.89	0.28	3.176	0.00149105	0.01715	up	SLC29A1	solute carrier family 29 member 1 (Augustine blood group) [Source:HGNC Symbol;Acc:HGNC:11003]	6	44219505	44234151	p21.1	1
ENSG00000149577	292.611	1.087	0.342	3.176	0.00149296	0.01715	up	SIDT2	SID1 transmembrane family member 2 [Source:HGNC Symbol;Acc:HGNC:24272]	11	117178733	117197445	q23.3	1
ENSG00000033627	3073.38	0.272	0.086	3.173	0.00150704	0.01727	up	ATP6V0A1	ATPase H+ transporting V0 subunit a1 [Source:HGNC Symbol;Acc:HGNC:865]	17	42458844	42522611	q21.2	1
ENSG00000130724	226.965	0.929	0.293	3.173	0.00150826	0.01727	up	CHMP2A	charged multivesicular body protein 2A [Source:HGNC Symbol;Acc:HGNC:30216]	19	58551566	58555124	q13.43	-1
ENSG00000051108	1934.59	0.275	0.087	3.172	0.00151495	0.01729	up	HERPUD1	homocysteine inducible ER protein with ubiquitin like domain 1 [Source:HGNC Symbol;Acc:HGNC:13744]	16	56932048	56944863	q13	1
ENSG00000170266	1722.3	0.468	0.148	3.161	0.00157346	0.01775	up	GLB1	galactosidase beta 1 [Source:HGNC Symbol;Acc:HGNC:4298]	3	32996608	33097230	p22.3	-1
ENSG00000183741	300.468	0.565	0.179	3.16	0.00157894	0.01778	up	CBX6	chromobox 6 [Source:HGNC Symbol;Acc:HGNC:1556]	22	38861450	38872314	q13.1	-1
ENSG00000163931	474.306	0.87	0.275	3.16	0.00157752	0.01778	up	TKT	transketolase [Source:HGNC Symbol;Acc:HGNC:11834]	3	53224707	53256052	p21.1	-1
ENSG00000137409	478.105	0.609	0.193	3.159	0.00158178	0.01779	up	MTCH1	mitochondrial carrier 1 [Source:HGNC Symbol;Acc:HGNC:17586]	6	36968141	36986298	p21.2	-1
ENSG00000188549	64.966	1.186	0.375	3.159	0.00158369	0.01779	up	CCDC9B	coiled-coil domain containing 9B [Source:HGNC Symbol;Acc:HGNC:33488]	15	40331452	40340967	q15.1	-1
ENSG00000109099	625.64	0.489	0.155	3.158	0.00158843	0.01782	up	PMP22	peripheral myelin protein 22 [Source:HGNC Symbol;Acc:HGNC:9118]	17	15229777	15265357	p12	-1
ENSG00000142583	619.212	0.583	0.185	3.156	0.00159835	0.01788	up	SLC2A5	solute carrier family 2 member 5 [Source:HGNC Symbol;Acc:HGNC:11010]	1	9035107	9088478	p36.23	-1
ENSG00000187778	41.69	1.405	0.445	3.155	0.00160615	0.01792	up	MCRS1	microspherule protein 1 [Source:HGNC Symbol;Acc:HGNC:6960]	12	49556544	49568153	q13.12	-1
ENSG00000033327	511.377	0.601	0.191	3.151	0.00162862	0.01809	up	GAB2	GRB2 associated binding protein 2 [Source:HGNC Symbol;Acc:HGNC:14458]	11	78215297	78418348	q14.1	-1
ENSG00000158109	384.052	0.495	0.157	3.148	0.00164437	0.01821	up	TPRG1L	tumor protein p63 regulated 1 like [Source:HGNC Symbol;Acc:HGNC:27007]	1	3625002	3630127	p36.32	1
ENSG00000101161	348.704	0.542	0.173	3.135	0.00172	0.0189	up	PRPF6	pre-mRNA processing factor 6 [Source:HGNC Symbol;Acc:HGNC:15860]	20	63981135	64033100	q13.33	1
ENSG00000077150	386.427	0.625	0.2	3.13	0.0017489	0.01914	up	NFKB2	nuclear factor kappa B subunit 2 [Source:HGNC Symbol;Acc:HGNC:7795]	10	102394110	102402529	q24.32	1
ENSG00000159433	126.355	0.869	0.278	3.127	0.0017652	0.01927	up	STARD9	StAR related lipid transfer domain containing 9 [Source:HGNC Symbol;Acc:HGNC:19162]	15	42575659	42720981	q15.2	1
ENSG00000002586	745.006	0.792	0.253	3.126	0.00177024	0.01931	up	CD99	CD99 molecule (Xg blood group) [Source:HGNC Symbol;Acc:HGNC:7082]	X	2691133	2741309	p22.33	1
ENSG00000197081	11888.6	0.408	0.131	3.125	0.00177706	0.01936	up	IGF2R	insulin like growth factor 2 receptor [Source:HGNC Symbol;Acc:HGNC:5467]	6	159969099	160113507	q25.3	1
ENSG00000107130	284.155	0.749	0.24	3.122	0.00179849	0.01955	up	NCS1	neuronal calcium sensor 1 [Source:HGNC Symbol;Acc:HGNC:3953]	9	130172578	130237304	q34.11	1
ENSG00000167548	190.829	0.801	0.257	3.12	0.00181145	0.01966	up	KMT2D	lysine methyltransferase 2D [Source:HGNC Symbol;Acc:HGNC:7133]	12	49018975	49059774	q13.12	-1
ENSG00000136485	2647.06	0.305	0.098	3.119	0.00181773	0.01968	up	DCAF7	DDB1 and CUL4 associated factor 7 [Source:HGNC Symbol;Acc:HGNC:30915]	17	63550461	63594266	q23.3	1
ENSG00000163956	206.842	0.804	0.258	3.119	0.00181654	0.01968	up	LRPAP1	LDL receptor related protein associated protein 1 [Source:HGNC Symbol;Acc:HGNC:6701]	4	3506376	3532559	p16.3	-1
ENSG00000006534	172.892	0.881	0.283	3.116	0.00183494	0.0198	up	ALDH3B1	aldehyde dehydrogenase 3 family member B1 [Source:HGNC Symbol;Acc:HGNC:410]	11	68008578	68029282	q13.2	1
ENSG00000198728	151.895	0.796	0.256	3.115	0.00184094	0.01984	up	LDB1	LIM domain binding 1 [Source:HGNC Symbol;Acc:HGNC:6532]	10	102107560	102120453	q24.32	-1
ENSG00000170889	84.146	1.348	0.433	3.114	0.00184385	0.01984	up	RPS9	ribosomal protein S9 [Source:HGNC Symbol;Acc:HGNC:10442]	19	54200742	54249003	q13.42	1
ENSG00000101017	572.182	0.752	0.241	3.114	0.00184786	0.01985	up	CD40	CD40 molecule [Source:HGNC Symbol;Acc:HGNC:11919]	20	46118272	46129863	q13.12	1
ENSG00000108799	450.453	0.428	0.138	3.107	0.00188719	0.0201	up	EZH1	enhancer of zeste 1 polycomb repressive complex 2 subunit [Source:HGNC Symbol;Acc:HGNC:3526]	17	42700275	42745049	q21.2	-1
ENSG00000214212	76.367	0.992	0.32	3.106	0.00189651	0.02014	up	C19orf38	chromosome 19 open reading frame 38 [Source:HGNC Symbol;Acc:HGNC:34073]	19	10836575	10869790	p13.2	1
ENSG00000107021	139.009	0.955	0.308	3.101	0.00192733	0.02041	up	TBC1D13	TBC1 domain family member 13 [Source:HGNC Symbol;Acc:HGNC:25571]	9	128787204	128810432	q34.11	1
ENSG00000143801	211.81	0.854	0.276	3.1	0.00193485	0.02044	up	PSEN2	presenilin 2 [Source:HGNC Symbol;Acc:HGNC:9509]	1	226870184	226896105	q42.13	1
ENSG00000174282	635.279	0.397	0.128	3.094	0.00197726	0.02083	up	ZBTB4	zinc finger and BTB domain containing 4 [Source:HGNC Symbol;Acc:HGNC:23847]	17	7459366	7484263	p13.1	-1
ENSG00000137207	149.844	1.048	0.339	3.093	0.00198169	0.02083	up	YIPF3	Yip1 domain family member 3 [Source:HGNC Symbol;Acc:HGNC:21023]	6	43511827	43516990	p21.1	-1
ENSG00000105723	50.024	1.275	0.412	3.092	0.00198676	0.02086	up	GSK3A	glycogen synthase kinase 3 alpha [Source:HGNC Symbol;Acc:HGNC:4616]	19	42230186	42242625	q13.2	-1
ENSG00000103042	198.819	0.951	0.308	3.091	0.00199456	0.02092	up	SLC38A7	solute carrier family 38 member 7 [Source:HGNC Symbol;Acc:HGNC:25582]	16	58665109	58685104	q21	-1
ENSG00000135912	791.835	0.489	0.158	3.088	0.00201428	0.02105	up	TTLL4	tubulin tyrosine ligase like 4 [Source:HGNC Symbol;Acc:HGNC:28976]	2	218710845	218755416	q35	1
ENSG00000149485	3234.96	0.383	0.124	3.086	0.00202945	0.02118	up	FADS1	fatty acid desaturase 1 [Source:HGNC Symbol;Acc:HGNC:3574]	11	61799625	61829318	q12.2	-1
ENSG00000156990	35.721	1.505	0.488	3.084	0.00204024	0.02127	up	RPUSD3	RNA pseudouridylate synthase domain containing 3 [Source:HGNC Symbol;Acc:HGNC:28437]	3	9837849	9844602	p25.3	-1
ENSG00000196182	137.38	1.034	0.336	3.081	0.00206594	0.02149	up	STK40	serine/threonine kinase 40 [Source:HGNC Symbol;Acc:HGNC:21373]	1	36339624	36385896	p34.3	-1
ENSG00000152213	229.714	0.632	0.206	3.074	0.00211152	0.02185	up	ARL11	ADP ribosylation factor like GTPase 11 [Source:HGNC Symbol;Acc:HGNC:24046]	13	49628299	49633872	q14.2	1
ENSG00000130164	402.226	0.592	0.193	3.067	0.00216384	0.02224	up	LDLR	low density lipoprotein receptor [Source:HGNC Symbol;Acc:HGNC:6547]	19	11089362	11133816	p13.2	1
ENSG00000101474	1086.24	0.489	0.16	3.066	0.00216768	0.02225	up	APMAP	adipocyte plasma membrane associated protein [Source:HGNC Symbol;Acc:HGNC:13238]	20	24962925	24992979	p11.21	-1
ENSG00000023191	41.727	1.373	0.448	3.066	0.00217264	0.02225	up	RNH1	ribonuclease/angiogenin inhibitor 1 [Source:HGNC Symbol;Acc:HGNC:10074]	11	494512	507300	p15.5	-1
ENSG00000167074	108.386	0.916	0.299	3.063	0.00219294	0.0224	up	TEF	TEF, PAR bZIP transcription factor [Source:HGNC Symbol;Acc:HGNC:11722]	22	41367333	41399326	q13.2	1
ENSG00000159352	581.327	0.698	0.228	3.059	0.00222223	0.02259	up	PSMD4	proteasome 26S subunit, non-ATPase 4 [Source:HGNC Symbol;Acc:HGNC:9561]	1	151254703	151267479	q21.3	1
ENSG00000164062	123.125	1.333	0.436	3.06	0.0022161	0.02259	up	APEH	acylaminoacyl-peptide hydrolase [Source:HGNC Symbol;Acc:HGNC:586]	3	49674002	49683963	p21.31	1
ENSG00000204843	323.843	0.717	0.235	3.054	0.00226025	0.02283	up	DCTN1	dynactin subunit 1 [Source:HGNC Symbol;Acc:HGNC:2711]	2	74361154	74392087	p13.1	-1
ENSG00000094914	149.63	0.741	0.243	3.054	0.00226135	0.02283	up	AAAS	aladin WD repeat nucleoporin [Source:HGNC Symbol;Acc:HGNC:13666]	12	53307456	53324864	q13.13	-1
ENSG00000204592	3763.18	0.311	0.102	3.052	0.00227194	0.02286	up	HLA-E	major histocompatibility complex, class I, E [Source:HGNC Symbol;Acc:HGNC:4962]	6	30489467	30494205	p22.1	1
ENSG00000204463	397.184	0.618	0.203	3.048	0.00230627	0.02314	up	BAG6	BCL2 associated athanogene 6 [Source:HGNC Symbol;Acc:HGNC:13919]	6	31639028	31652705	p21.33	-1
ENSG00000117153	1129.63	0.292	0.096	3.044	0.00233524	0.02338	up	KLHL12	kelch like family member 12 [Source:HGNC Symbol;Acc:HGNC:19360]	1	202891100	202928636	q32.1	-1
ENSG00000149925	447.744	1.735	0.57	3.041	0.00235471	0.02351	up	ALDOA	aldolase, fructose-bisphosphate A [Source:HGNC Symbol;Acc:HGNC:414]	16	30064164	30070457	p11.2	1
ENSG00000148331	59.445	1.508	0.498	3.029	0.00245664	0.02427	up	ASB6	ankyrin repeat and SOCS box containing 6 [Source:HGNC Symbol;Acc:HGNC:17181]	9	129634604	129642169	q34.11	-1
ENSG00000146409	1186.59	0.414	0.137	3.022	0.00251166	0.02469	up	SLC18B1	solute carrier family 18 member B1 [Source:HGNC Symbol;Acc:HGNC:21573]	6	132769370	132798553	q23.2	-1
ENSG00000123595	790.182	0.354	0.117	3.022	0.00251508	0.0247	up	RAB9A	RAB9A, member RAS oncogene family [Source:HGNC Symbol;Acc:HGNC:9792]	X	13689125	13710506	p22.2	1
ENSG00000164300	2212.19	0.267	0.088	3.018	0.00254372	0.02488	up	SERINC5	serine incorporator 5 [Source:HGNC Symbol;Acc:HGNC:18825]	5	80111651	80256079	q14.1	-1
ENSG00000116786	137.538	1.337	0.443	3.017	0.00254934	0.02491	up	PLEKHM2	pleckstrin homology and RUN domain containing M2 [Source:HGNC Symbol;Acc:HGNC:29131]	1	15684332	15734769	p36.21	1
ENSG00000198848	1350.5	0.64	0.212	3.015	0.0025663	0.02503	up	CES1	carboxylesterase 1 [Source:HGNC Symbol;Acc:HGNC:1863]	16	55802851	55833337	q12.2	-1
ENSG00000160593	1733.14	0.417	0.138	3.014	0.00257786	0.0251	up	JAML	junction adhesion molecule like [Source:HGNC Symbol;Acc:HGNC:19084]	11	118193740	118225094	q23.3	-1
ENSG00000137700	68.203	1.161	0.385	3.012	0.0025967	0.02521	up	SLC37A4	solute carrier family 37 member 4 [Source:HGNC Symbol;Acc:HGNC:4061]	11	119024114	119030906	q23.3	-1
ENSG00000189060	563.399	0.539	0.179	3.011	0.00260097	0.02522	up	H1F0	H1 histone family member 0 [Source:HGNC Symbol;Acc:HGNC:4714]	22	37805093	37807436	q13.1	1
ENSG00000169100	139.615	1.046	0.347	3.011	0.00260808	0.02524	up	SLC25A6	solute carrier family 25 member 6 [Source:HGNC Symbol;Acc:HGNC:10992]	X	1386152	1392724	p22.33	-1
ENSG00000196576	79.887	1.316	0.437	3.011	0.00260779	0.02524	up	PLXNB2	plexin B2 [Source:HGNC Symbol;Acc:HGNC:9104]	22	50274979	50307627	q13.33	-1
ENSG00000084207	68.646	1.742	0.579	3.01	0.00261631	0.02529	up	GSTP1	glutathione S-transferase pi 1 [Source:HGNC Symbol;Acc:HGNC:4638]	11	67583595	67586656	q13.2	1
ENSG00000198911	907.823	0.519	0.172	3.008	0.00262684	0.02535	up	SREBF2	sterol regulatory element binding transcription factor 2 [Source:HGNC Symbol;Acc:HGNC:11290]	22	41833079	41907308	q13.2	1
ENSG00000108179	1656.07	0.622	0.207	2.999	0.00271247	0.02591	up	PPIF	peptidylprolyl isomerase F [Source:HGNC Symbol;Acc:HGNC:9259]	10	79347469	79355337	q22.3	1
ENSG00000133246	39.838	1.472	0.491	2.999	0.00270708	0.02591	up	PRAM1	PML-RARA regulated adaptor molecule 1 [Source:HGNC Symbol;Acc:HGNC:30091]	19	8490056	8503112	p13.2	-1
ENSG00000107223	69.615	1.576	0.525	2.999	0.0027106	0.02591	up	EDF1	endothelial differentiation related factor 1 [Source:HGNC Symbol;Acc:HGNC:3164]	9	136862119	136866286	q34.3	-1
ENSG00000055483	204.183	0.584	0.195	2.996	0.00273217	0.02605	up	USP36	ubiquitin specific peptidase 36 [Source:HGNC Symbol;Acc:HGNC:20062]	17	78787381	78841441	q25.3	-1
ENSG00000100985	2558.72	1.159	0.387	2.996	0.0027316	0.02605	up	MMP9	matrix metallopeptidase 9 [Source:HGNC Symbol;Acc:HGNC:7176]	20	46008908	46016561	q13.12	1
ENSG00000131018	1164.83	0.313	0.104	2.993	0.00275833	0.02623	up	SYNE1	spectrin repeat containing nuclear envelope protein 1 [Source:HGNC Symbol;Acc:HGNC:17089]	6	152121684	152637801	q25.2	-1
ENSG00000161091	831.65	0.736	0.246	2.988	0.00280784	0.02659	up	MFSD12	major facilitator superfamily domain containing 12 [Source:HGNC Symbol;Acc:HGNC:28299]	19	3538261	3574290	p13.3	-1
ENSG00000279117	589.182	0.522	0.175	2.982	0.00286725	0.02708	up			11	75260129	75262466	q13.4	-1
ENSG00000032444	37.834	1.395	0.468	2.979	0.00289404	0.02726	up	PNPLA6	patatin like phospholipase domain containing 6 [Source:HGNC Symbol;Acc:HGNC:16268]	19	7534004	7561764	p13.2	1
ENSG00000180992	43.592	1.548	0.52	2.974	0.00293581	0.02757	up	MRPL14	mitochondrial ribosomal protein L14 [Source:HGNC Symbol;Acc:HGNC:14279]	6	44113454	44127457	p21.1	-1
ENSG00000163377	89.812	0.894	0.301	2.971	0.00296456	0.02777	up	FAM19A4	family with sequence similarity 19 member A4, C-C motif chemokine like [Source:HGNC Symbol;Acc:HGNC:21591]	3	68731766	68953297	p14.1	-1
ENSG00000085662	1685.86	0.464	0.156	2.968	0.00299966	0.02804	up	AKR1B1	aldo-keto reductase family 1 member B [Source:HGNC Symbol;Acc:HGNC:381]	7	134442350	134459284	q33	-1
ENSG00000105438	456.297	0.578	0.195	2.966	0.00301776	0.02816	up	KDELR1	KDEL endoplasmic reticulum protein retention receptor 1 [Source:HGNC Symbol;Acc:HGNC:6304]	19	48382570	48391553	q13.33	-1
ENSG00000119688	131.07	0.826	0.278	2.966	0.00302037	0.02816	up	ABCD4	ATP binding cassette subfamily D member 4 [Source:HGNC Symbol;Acc:HGNC:68]	14	74285423	74303056	q24.3	-1
ENSG00000110931	426.489	0.434	0.146	2.963	0.00304622	0.02834	up	CAMKK2	calcium/calmodulin dependent protein kinase kinase 2 [Source:HGNC Symbol;Acc:HGNC:1470]	12	121237691	121298308	q24.31	-1
ENSG00000132376	175.101	0.732	0.247	2.962	0.00305428	0.02835	up	INPP5K	inositol polyphosphate-5-phosphatase K [Source:HGNC Symbol;Acc:HGNC:33882]	17	1494571	1516888	p13.3	-1
ENSG00000143819	227.3	0.862	0.291	2.96	0.00307316	0.02844	up	EPHX1	epoxide hydrolase 1 [Source:HGNC Symbol;Acc:HGNC:3401]	1	225810092	225845563	q42.12	1
ENSG00000126001	218.654	0.659	0.223	2.958	0.00309906	0.02858	up	CEP250	centrosomal protein 250 [Source:HGNC Symbol;Acc:HGNC:1859]	20	35455164	35519280	q11.22	1
ENSG00000276293	803.139	0.398	0.135	2.955	0.00312876	0.0287	up	PIP4K2B	phosphatidylinositol-5-phosphate 4-kinase type 2 beta [Source:HGNC Symbol;Acc:HGNC:8998]	17	38765689	38800126	q12	-1
ENSG00000141002	196.558	0.793	0.268	2.953	0.0031445	0.0288	up	TCF25	transcription factor 25 [Source:HGNC Symbol;Acc:HGNC:29181]	16	89873570	89913627	q24.3	1
ENSG00000128272	1569.25	0.543	0.184	2.951	0.00316852	0.02891	up	ATF4	activating transcription factor 4 [Source:HGNC Symbol;Acc:HGNC:786]	22	39519695	39522685	q13.1	1
ENSG00000099995	717.908	0.391	0.133	2.949	0.00318909	0.02904	up	SF3A1	splicing factor 3a subunit 1 [Source:HGNC Symbol;Acc:HGNC:10765]	22	30331988	30356947	q12.2	-1
ENSG00000119321	4919.17	0.296	0.101	2.947	0.00320377	0.02907	up	FKBP15	FK506 binding protein 15 [Source:HGNC Symbol;Acc:HGNC:23397]	9	113161006	113221361	q32	-1
ENSG00000177426	473.206	0.422	0.143	2.945	0.00322754	0.02921	up	TGIF1	TGFB induced factor homeobox 1 [Source:HGNC Symbol;Acc:HGNC:11776]	18	3411608	3459978	p11.31	1
ENSG00000225190	82.777	0.893	0.304	2.942	0.00326494	0.02949	up	PLEKHM1	pleckstrin homology and RUN domain containing M1 [Source:HGNC Symbol;Acc:HGNC:29017]	17	45435900	45490749	q21.31	-1
ENSG00000105223	294.293	1.646	0.56	2.939	0.00329801	0.02974	up	PLD3	phospholipase D family member 3 [Source:HGNC Symbol;Acc:HGNC:17158]	19	40348456	40380439	q13.2	1
ENSG00000213741	591.895	0.596	0.203	2.936	0.00332392	0.0298	up	RPS29	ribosomal protein S29 [Source:HGNC Symbol;Acc:HGNC:10419]	14	49570984	49599164	q21.3	-1
ENSG00000196535	121.321	1.331	0.453	2.936	0.00332198	0.0298	up	MYO18A	myosin XVIIIA [Source:HGNC Symbol;Acc:HGNC:31104]	17	29071124	29180412	q11.2	-1
ENSG00000158714	2541.31	0.343	0.117	2.933	0.00336063	0.03001	up	SLAMF8	SLAM family member 8 [Source:HGNC Symbol;Acc:HGNC:21391]	1	159826750	159837249	q23.2	1
ENSG00000138613	540.384	0.396	0.135	2.93	0.00338644	0.03016	up	APH1B	aph-1 homolog B, gamma-secretase subunit [Source:HGNC Symbol;Acc:HGNC:24080]	15	63276018	63309126	q22.2	1
ENSG00000196209	245.627	0.729	0.249	2.93	0.00339151	0.03018	up	SIRPB2	signal regulatory protein beta 2 [Source:HGNC Symbol;Acc:HGNC:16247]	20	1470741	1491587	p13	-1
ENSG00000266835	523.248	0.496	0.169	2.928	0.00341695	0.03033	up	GAPLINC	gastric adenocarcinoma associated, positive CD44 regulator, long intergenic non-coding RNA [Source:HGNC Symbol;Acc:HGNC:51308]	18	3466250	3478978	p11.31	1
ENSG00000135124	258.45	0.602	0.206	2.926	0.00343093	0.0304	up	P2RX4	purinergic receptor P2X 4 [Source:HGNC Symbol;Acc:HGNC:8535]	12	121209857	121234106	q24.31	1
ENSG00000171467	1425.78	0.287	0.098	2.926	0.00343841	0.03044	up	ZNF318	zinc finger protein 318 [Source:HGNC Symbol;Acc:HGNC:13578]	6	43307134	43369478	p21.1	-1
ENSG00000112983	488.663	0.475	0.162	2.925	0.0034454	0.03047	up	BRD8	bromodomain containing 8 [Source:HGNC Symbol;Acc:HGNC:19874]	5	138139766	138178986	q31.2	-1
ENSG00000065802	241.49	0.53	0.181	2.921	0.00349457	0.03083	up	ASB1	ankyrin repeat and SOCS box containing 1 [Source:HGNC Symbol;Acc:HGNC:16011]	2	238426742	238452250	q37.3	1
ENSG00000116871	184.821	0.961	0.329	2.92	0.00350412	0.03088	up	MAP7D1	MAP7 domain containing 1 [Source:HGNC Symbol;Acc:HGNC:25514]	1	36155579	36180849	p34.3	1
ENSG00000114353	2241.9	0.524	0.18	2.918	0.00351879	0.03096	up	GNAI2	G protein subunit alpha i2 [Source:HGNC Symbol;Acc:HGNC:4385]	3	50226292	50259355	p21.31	1
ENSG00000154803	290.584	0.55	0.189	2.911	0.00360162	0.03155	up	FLCN	folliculin [Source:HGNC Symbol;Acc:HGNC:27310]	17	17212212	17237188	p11.2	-1
ENSG00000182372	574.429	0.453	0.156	2.908	0.00363506	0.03175	up	CLN8	CLN8, transmembrane ER and ERGIC protein [Source:HGNC Symbol;Acc:HGNC:2079]	8	1755778	1801711	p23.3	1
ENSG00000071859	176.45	1.228	0.423	2.907	0.00365007	0.03184	up	FAM50A	family with sequence similarity 50 member A [Source:HGNC Symbol;Acc:HGNC:18786]	X	154444126	154450654	q28	1
ENSG00000161203	1414.49	0.656	0.226	2.904	0.00367853	0.03195	up	AP2M1	adaptor related protein complex 2 mu 1 subunit [Source:HGNC Symbol;Acc:HGNC:564]	3	184174689	184184091	q27.1	1
ENSG00000171302	229.849	0.627	0.216	2.904	0.00368284	0.03196	up	CANT1	calcium activated nucleotidase 1 [Source:HGNC Symbol;Acc:HGNC:19721]	17	78991717	79009867	q25.3	-1
ENSG00000155368	7834.8	0.337	0.116	2.901	0.00372126	0.03224	up	DBI	diazepam binding inhibitor, acyl-CoA binding protein [Source:HGNC Symbol;Acc:HGNC:2690]	2	119366921	119372560	q14.2	1
ENSG00000139508	1363.1	0.338	0.117	2.894	0.00380183	0.03273	up	SLC46A3	solute carrier family 46 member 3 [Source:HGNC Symbol;Acc:HGNC:27501]	13	28700064	28718970	q12.3	-1
ENSG00000104904	1459.49	0.389	0.134	2.894	0.00380292	0.03273	up	OAZ1	ornithine decarboxylase antizyme 1 [Source:HGNC Symbol;Acc:HGNC:8095]	19	2269509	2273490	p13.3	1
ENSG00000141753	113.698	0.953	0.33	2.892	0.00382763	0.03285	up	IGFBP4	insulin like growth factor binding protein 4 [Source:HGNC Symbol;Acc:HGNC:5473]	17	40443461	40457731	q21.2	1
ENSG00000179163	4388.56	0.22	0.076	2.89	0.00385118	0.033	up	FUCA1	alpha-L-fucosidase 1 [Source:HGNC Symbol;Acc:HGNC:4006]	1	23845077	23868294	p36.11	-1
ENSG00000214022	182.729	0.657	0.227	2.89	0.00385786	0.033	up	REPIN1	replication initiator 1 [Source:HGNC Symbol;Acc:HGNC:17922]	7	150368189	150374044	q36.1	1
ENSG00000124126	340.76	0.67	0.232	2.889	0.00386163	0.033	up	PREX1	phosphatidylinositol-3,4,5-trisphosphate dependent Rac exchange factor 1 [Source:HGNC Symbol;Acc:HGNC:32594]	20	48624252	48827883	q13.13	-1
ENSG00000100439	549.312	0.759	0.263	2.886	0.00389921	0.03321	up	ABHD4	abhydrolase domain containing 4 [Source:HGNC Symbol;Acc:HGNC:20154]	14	22598237	22613215	q11.2	1
ENSG00000127948	92.02	0.884	0.306	2.886	0.00390666	0.03322	up	POR	cytochrome p450 oxidoreductase [Source:HGNC Symbol;Acc:HGNC:9208]	7	75899200	75986855	q11.23	1
ENSG00000157326	135.139	0.823	0.286	2.883	0.00393528	0.03332	up	DHRS4	dehydrogenase/reductase 4 [Source:HGNC Symbol;Acc:HGNC:16985]	14	23953586	23969279	q11.2	1
ENSG00000060971	236.403	0.866	0.301	2.879	0.00398969	0.0337	up	ACAA1	acetyl-CoA acyltransferase 1 [Source:HGNC Symbol;Acc:HGNC:82]	3	38103129	38137242	p22.2	-1
ENSG00000139641	1772.7	0.584	0.203	2.878	0.00399984	0.03376	up	ESYT1	extended synaptotagmin 1 [Source:HGNC Symbol;Acc:HGNC:29534]	12	56118250	56144671	q13.2	1
ENSG00000198053	4280.39	0.37	0.129	2.875	0.00404219	0.03394	up	SIRPA	signal regulatory protein alpha [Source:HGNC Symbol;Acc:HGNC:9662]	20	1894167	1940592	p13	1
ENSG00000140968	1294.93	0.315	0.11	2.869	0.00412183	0.03443	up	IRF8	interferon regulatory factor 8 [Source:HGNC Symbol;Acc:HGNC:5358]	16	85898803	85922609	q24.1	1
ENSG00000214655	59.582	1.087	0.38	2.864	0.00418928	0.03489	up	ZSWIM8	zinc finger SWIM-type containing 8 [Source:HGNC Symbol;Acc:HGNC:23528]	10	73785582	73801797	q22.2	1
ENSG00000089177	1198.52	0.3	0.105	2.863	0.00419701	0.03493	up	KIF16B	kinesin family member 16B [Source:HGNC Symbol;Acc:HGNC:15869]	20	16272104	16573434	p12.1	-1
ENSG00000095951	508.409	0.419	0.146	2.861	0.00422702	0.03512	up	HIVEP1	human immunodeficiency virus type I enhancer binding protein 1 [Source:HGNC Symbol;Acc:HGNC:4920]	6	12008762	12164999	p24.1	1
ENSG00000175662	77.495	0.962	0.336	2.86	0.00423473	0.03512	up	TOM1L2	target of myb1 like 2 membrane trafficking protein [Source:HGNC Symbol;Acc:HGNC:11984]	17	17843511	17972422	p11.2	-1
ENSG00000088543	37.746	1.255	0.439	2.86	0.00423404	0.03512	up	C3orf18	chromosome 3 open reading frame 18 [Source:HGNC Symbol;Acc:HGNC:24837]	3	50558025	50571027	p21.31	-1
ENSG00000099194	25778.9	0.324	0.113	2.857	0.00427253	0.03541	up	SCD	stearoyl-CoA desaturase [Source:HGNC Symbol;Acc:HGNC:10571]	10	100347124	100364834	q24.31	1
ENSG00000142676	2430.92	0.496	0.174	2.857	0.00427662	0.03541	up	RPL11	ribosomal protein L11 [Source:HGNC Symbol;Acc:HGNC:10301]	1	23691742	23696835	p36.11	1
ENSG00000167996	158.73	0.758	0.266	2.853	0.00432446	0.03574	up	FTH1	ferritin heavy chain 1 [Source:HGNC Symbol;Acc:HGNC:3976]	11	61959718	61967660	q12.3	-1
ENSG00000018280	594.842	0.719	0.252	2.852	0.00434722	0.03583	up	SLC11A1	solute carrier family 11 member 1 [Source:HGNC Symbol;Acc:HGNC:10907]	2	218382029	218396894	q35	1
ENSG00000196743	97757.8	0.288	0.101	2.851	0.00435994	0.0359	up	GM2A	GM2 ganglioside activator [Source:HGNC Symbol;Acc:HGNC:4367]	5	151212150	151270440	q33.1	1
ENSG00000132199	708.255	0.389	0.137	2.847	0.004414	0.03623	up	ENOSF1	enolase superfamily member 1 [Source:HGNC Symbol;Acc:HGNC:30365]	18	670324	712676	p11.32	-1
ENSG00000122254	456.771	0.543	0.191	2.842	0.00447882	0.03661	up	HS3ST2	heparan sulfate-glucosamine 3-sulfotransferase 2 [Source:HGNC Symbol;Acc:HGNC:5195]	16	22814177	22916338	p12.2	1
ENSG00000105221	65.808	1.142	0.402	2.837	0.00456014	0.03713	up	AKT2	AKT serine/threonine kinase 2 [Source:HGNC Symbol;Acc:HGNC:392]	19	40230317	40285536	q13.2	-1
ENSG00000132589	314.019	0.72	0.254	2.834	0.00459182	0.03726	up	FLOT2	flotillin 2 [Source:HGNC Symbol;Acc:HGNC:3758]	17	28879335	28897679	q11.2	-1
ENSG00000100226	97.212	1.063	0.375	2.835	0.0045883	0.03726	up	GTPBP1	GTP binding protein 1 [Source:HGNC Symbol;Acc:HGNC:4669]	22	38705723	38738299	q13.1	1
ENSG00000173369	76.685	1.524	0.538	2.832	0.00462158	0.03739	up	C1QB	complement C1q B chain [Source:HGNC Symbol;Acc:HGNC:1242]	1	22652762	22661538	p36.12	1
ENSG00000089041	1890.48	0.28	0.099	2.831	0.00463774	0.03743	up	P2RX7	purinergic receptor P2X 7 [Source:HGNC Symbol;Acc:HGNC:8537]	12	121132819	121188032	q24.31	1
ENSG00000167703	161.967	0.893	0.316	2.829	0.00466477	0.03756	up	SLC43A2	solute carrier family 43 member 2 [Source:HGNC Symbol;Acc:HGNC:23087]	17	1569267	1628886	p13.3	-1
ENSG00000130517	586.368	0.432	0.153	2.828	0.0046856	0.03769	up	PGPEP1	pyroglutamyl-peptidase I [Source:HGNC Symbol;Acc:HGNC:13568]	19	18340587	18369950	p13.11	1
ENSG00000104419	1552.91	0.358	0.127	2.827	0.00469663	0.03774	up	NDRG1	N-myc downstream regulated 1 [Source:HGNC Symbol;Acc:HGNC:7679]	8	133237171	133302022	q24.22	-1
ENSG00000166548	406.289	0.453	0.16	2.827	0.00469853	0.03774	up	TK2	thymidine kinase 2, mitochondrial [Source:HGNC Symbol;Acc:HGNC:11831]	16	66508003	66552544	q21	-1
ENSG00000141252	775.039	0.48	0.17	2.826	0.00472033	0.03785	up	VPS53	VPS53, GARP complex subunit [Source:HGNC Symbol;Acc:HGNC:25608]	17	508668	721717	p13.3	-1
ENSG00000213699	290.035	0.528	0.187	2.825	0.00472735	0.03785	up	SLC35F6	solute carrier family 35 member F6 [Source:HGNC Symbol;Acc:HGNC:26055]	2	26764284	26781231	p23.3	1
ENSG00000101337	807.642	0.469	0.166	2.822	0.00476889	0.03805	up	TM9SF4	transmembrane 9 superfamily member 4 [Source:HGNC Symbol;Acc:HGNC:30797]	20	32109506	32167258	q11.21	1
ENSG00000010295	84.22	0.829	0.294	2.821	0.00478687	0.03814	up	IFFO1	intermediate filament family orphan 1 [Source:HGNC Symbol;Acc:HGNC:24970]	12	6538375	6556083	p13.31	-1
ENSG00000204227	72.451	1.139	0.404	2.82	0.00480061	0.03819	up	RING1	ring finger protein 1 [Source:HGNC Symbol;Acc:HGNC:10018]	6	33208495	33212722	p21.32	1
ENSG00000164237	65.197	1.058	0.375	2.817	0.0048409	0.03847	up	CMBL	carboxymethylenebutenolidase homolog [Source:HGNC Symbol;Acc:HGNC:25090]	5	10275875	10308026	p15.2	-1
ENSG00000129219	66.957	1.202	0.427	2.817	0.00484327	0.03847	up	PLD2	phospholipase D2 [Source:HGNC Symbol;Acc:HGNC:9068]	17	4807096	4823434	p13.2	1
ENSG00000135929	1401.54	1.228	0.436	2.817	0.0048471	0.03847	up	CYP27A1	cytochrome P450 family 27 subfamily A member 1 [Source:HGNC Symbol;Acc:HGNC:2605]	2	218781749	218815293	q35	1
ENSG00000103876	220.465	0.669	0.238	2.815	0.00488262	0.03866	up	FAH	fumarylacetoacetate hydrolase [Source:HGNC Symbol;Acc:HGNC:3579]	15	80152490	80186946	q25.1	1
ENSG00000063244	73.622	1.194	0.424	2.815	0.00487927	0.03866	up	U2AF2	U2 small nuclear RNA auxiliary factor 2 [Source:HGNC Symbol;Acc:HGNC:23156]	19	55654146	55674715	q13.42	1
ENSG00000213676	262.655	0.651	0.231	2.812	0.00491735	0.03888	up	ATF6B	activating transcription factor 6 beta [Source:HGNC Symbol;Acc:HGNC:2349]	6	32115264	32128253	p21.32	-1
ENSG00000174705	902.965	0.571	0.203	2.809	0.00496216	0.03917	up	SH3PXD2B	SH3 and PX domains 2B [Source:HGNC Symbol;Acc:HGNC:29242]	5	172325000	172454523	q35.1	-1
ENSG00000215861	406.857	0.804	0.286	2.809	0.00496914	0.0392	up			1	149197992	149321732	q21.2	-1
ENSG00000181982	54.613	1.027	0.366	2.809	0.00497709	0.03923	up	CCDC149	coiled-coil domain containing 149 [Source:HGNC Symbol;Acc:HGNC:25405]	4	24806117	24980204	p15.2	-1
ENSG00000117139	940.851	0.306	0.109	2.804	0.00504318	0.03946	up	KDM5B	lysine demethylase 5B [Source:HGNC Symbol;Acc:HGNC:18039]	1	202724491	202809470	q32.1	-1
ENSG00000179091	38.322	1.558	0.555	2.805	0.00503443	0.03946	up	CYC1	cytochrome c1 [Source:HGNC Symbol;Acc:HGNC:2579]	8	144095027	144097525	q24.3	1
ENSG00000100221	1063.51	0.354	0.126	2.802	0.00508276	0.03967	up	JOSD1	Josephin domain containing 1 [Source:HGNC Symbol;Acc:HGNC:28953]	22	38685543	38701556	q13.1	-1
ENSG00000131069	1674.18	0.475	0.17	2.798	0.00513923	0.03995	up	ACSS2	acyl-CoA synthetase short chain family member 2 [Source:HGNC Symbol;Acc:HGNC:15814]	20	34872146	34927962	q11.22	1
ENSG00000078808	49.174	1.471	0.526	2.797	0.00515628	0.03999	up	SDF4	stromal cell derived factor 4 [Source:HGNC Symbol;Acc:HGNC:24188]	1	1216908	1232031	p36.33	-1
ENSG00000244038	1036.2	0.529	0.189	2.794	0.00521297	0.04037	up	DDOST	dolichyl-diphosphooligosaccharide--protein glycosyltransferase non-catalytic subunit [Source:HGNC Symbol;Acc:HGNC:2728]	1	20651767	20661544	p36.12	-1
ENSG00000141968	384.213	0.844	0.302	2.793	0.00521773	0.04037	up	VAV1	vav guanine nucleotide exchange factor 1 [Source:HGNC Symbol;Acc:HGNC:12657]	19	6772714	6857366	p13.3	1
ENSG00000156113	1325.55	0.26	0.093	2.792	0.00523352	0.04045	up	KCNMA1	potassium calcium-activated channel subfamily M alpha 1 [Source:HGNC Symbol;Acc:HGNC:6284]	10	76869601	77638369	q22.3	-1
ENSG00000103365	1010.79	0.422	0.151	2.79	0.00527148	0.04052	up	GGA2	golgi associated, gamma adaptin ear containing, ARF binding protein 2 [Source:HGNC Symbol;Acc:HGNC:16064]	16	23463542	23521995	p12.2	-1
ENSG00000086015	260.8	0.701	0.251	2.79	0.00526527	0.04052	up	MAST2	microtubule associated serine/threonine kinase 2 [Source:HGNC Symbol;Acc:HGNC:19035]	1	45786987	46036124	p34.1	1
ENSG00000167515	190.182	0.807	0.289	2.79	0.00527271	0.04052	up	TRAPPC2L	trafficking protein particle complex 2 like [Source:HGNC Symbol;Acc:HGNC:30887]	16	88856220	88862686	q24.3	1
ENSG00000178252	40.559	1.847	0.662	2.791	0.00525952	0.04052	up	WDR6	WD repeat domain 6 [Source:HGNC Symbol;Acc:HGNC:12758]	3	49007062	49015953	p21.31	1
ENSG00000156860	67.212	1.101	0.395	2.786	0.00533449	0.04077	up	FBRS	fibrosin [Source:HGNC Symbol;Acc:HGNC:20442]	16	30658431	30670814	p11.2	1
ENSG00000144741	258.333	0.491	0.176	2.785	0.00534654	0.04078	up	SLC25A26	solute carrier family 25 member 26 [Source:HGNC Symbol;Acc:HGNC:20661]	3	66133610	66388116	p14.1	1
ENSG00000058056	310.534	0.464	0.167	2.784	0.00536963	0.04088	up	USP13	ubiquitin specific peptidase 13 [Source:HGNC Symbol;Acc:HGNC:12611]	3	179652755	179789401	q26.33	1
ENSG00000141506	749.995	0.488	0.175	2.781	0.0054171	0.04107	up	PIK3R5	phosphoinositide-3-kinase regulatory subunit 5 [Source:HGNC Symbol;Acc:HGNC:30035]	17	8878911	8965712	p13.1	-1
ENSG00000174903	37.812	1.687	0.607	2.781	0.00541503	0.04107	up	RAB1B	RAB1B, member RAS oncogene family [Source:HGNC Symbol;Acc:HGNC:18370]	11	66268533	66277492	q13.2	1
ENSG00000100296	244.562	0.619	0.223	2.78	0.00543503	0.0411	up	THOC5	THO complex 5 [Source:HGNC Symbol;Acc:HGNC:19074]	22	29505879	29555216	q12.2	-1
ENSG00000165458	448.413	0.653	0.235	2.78	0.00542985	0.0411	up	INPPL1	inositol polyphosphate phosphatase like 1 [Source:HGNC Symbol;Acc:HGNC:6080]	11	72223701	72239105	q13.4	1
ENSG00000087088	50.261	1.391	0.501	2.778	0.0054737	0.04131	up	BAX	BCL2 associated X, apoptosis regulator [Source:HGNC Symbol;Acc:HGNC:959]	19	48954815	48961798	q13.33	1
ENSG00000130402	263.588	0.863	0.311	2.776	0.00549647	0.04145	up	ACTN4	actinin alpha 4 [Source:HGNC Symbol;Acc:HGNC:166]	19	38647649	38731583	q13.2	1
ENSG00000214193	71.825	0.923	0.333	2.776	0.00550948	0.04149	up	SH3D21	SH3 domain containing 21 [Source:HGNC Symbol;Acc:HGNC:26236]	1	36306387	36324886	p34.3	1
ENSG00000087111	287.491	0.552	0.199	2.775	0.00552252	0.0415	up	PIGS	phosphatidylinositol glycan anchor biosynthesis class S [Source:HGNC Symbol;Acc:HGNC:14937]	17	28553383	28571872	q11.2	-1
ENSG00000169241	288.027	0.621	0.224	2.768	0.00564326	0.04215	up	SLC50A1	solute carrier family 50 member 1 [Source:HGNC Symbol;Acc:HGNC:30657]	1	155135344	155138857	q22	1
ENSG00000167107	129.922	1.001	0.362	2.768	0.00563949	0.04215	up	ACSF2	acyl-CoA synthetase family member 2 [Source:HGNC Symbol;Acc:HGNC:26101]	17	50426158	50474845	q21.33	1
ENSG00000087460	5245.74	0.255	0.092	2.762	0.00574336	0.04268	up	GNAS	GNAS complex locus [Source:HGNC Symbol;Acc:HGNC:4392]	20	58839718	58911192	q13.32	1
ENSG00000204070	822.883	0.409	0.148	2.763	0.0057297	0.04268	up	SYS1	SYS1, golgi trafficking protein [Source:HGNC Symbol;Acc:HGNC:16162]	20	45361937	45376798	q13.12	1
ENSG00000186451	97.595	0.868	0.314	2.763	0.00572665	0.04268	up	SPATA12	spermatogenesis associated 12 [Source:HGNC Symbol;Acc:HGNC:23221]	3	57060441	57075432	p14.3	1
ENSG00000109016	114.955	0.86	0.311	2.762	0.00575274	0.04272	up	DHRS7B	dehydrogenase/reductase 7B [Source:HGNC Symbol;Acc:HGNC:24547]	17	21123364	21193265	p11.2	1
ENSG00000186951	670.693	0.301	0.109	2.761	0.00576671	0.04273	up	PPARA	peroxisome proliferator activated receptor alpha [Source:HGNC Symbol;Acc:HGNC:9232]	22	46150521	46243756	q13.31	1
ENSG00000174945	210.505	0.672	0.243	2.761	0.00576714	0.04273	up	AMZ1	archaelysin family metallopeptidase 1 [Source:HGNC Symbol;Acc:HGNC:22231]	7	2679522	2775500	p22.3	1
ENSG00000163082	132.753	1.304	0.472	2.761	0.00576729	0.04273	up	SGPP2	sphingosine-1-phosphate phosphatase 2 [Source:HGNC Symbol;Acc:HGNC:19953]	2	222424517	222560948	q36.1	1
ENSG00000156508	31032.5	0.305	0.111	2.76	0.00578847	0.04286	up	EEF1A1	eukaryotic translation elongation factor 1 alpha 1 [Source:HGNC Symbol;Acc:HGNC:3189]	6	73515750	73523797	q13	-1
ENSG00000163812	1418.79	0.323	0.117	2.759	0.00580564	0.04289	up	ZDHHC3	zinc finger DHHC-type containing 3 [Source:HGNC Symbol;Acc:HGNC:18470]	3	44915257	44976185	p21.31	-1
ENSG00000175215	1121.12	0.456	0.166	2.756	0.00585692	0.04321	up	CTDSP2	CTD small phosphatase 2 [Source:HGNC Symbol;Acc:HGNC:17077]	12	57819927	57846739	q14.1	-1
ENSG00000144713	1664.65	0.507	0.184	2.755	0.0058664	0.04325	up	RPL32	ribosomal protein L32 [Source:HGNC Symbol;Acc:HGNC:10336]	3	12834485	12841588	p25.2	-1
ENSG00000172322	2834	0.236	0.086	2.753	0.00590787	0.04343	up	CLEC12A	C-type lectin domain family 12 member A [Source:HGNC Symbol;Acc:HGNC:31713]	12	9951316	9995694	p13.31	1
ENSG00000130985	731.662	0.634	0.23	2.751	0.00595009	0.04365	up	UBA1	ubiquitin like modifier activating enzyme 1 [Source:HGNC Symbol;Acc:HGNC:12469]	X	47190861	47215128	p11.3	1
ENSG00000087086	19210	1.587	0.578	2.748	0.00599552	0.04385	up	FTL	ferritin light chain [Source:HGNC Symbol;Acc:HGNC:3999]	19	48965301	48966878	q13.33	1
ENSG00000100813	1903.42	0.334	0.122	2.74	0.00613589	0.04459	up	ACIN1	apoptotic chromatin condensation inducer 1 [Source:HGNC Symbol;Acc:HGNC:17066]	14	23058564	23095614	q11.2	-1
ENSG00000197321	410.955	0.427	0.156	2.741	0.00612652	0.04459	up	SVIL	supervillin [Source:HGNC Symbol;Acc:HGNC:11480]	10	29457338	29736781	p11.23	-1
ENSG00000185291	108.885	0.996	0.364	2.741	0.00613379	0.04459	up	IL3RA	interleukin 3 receptor subunit alpha [Source:HGNC Symbol;Acc:HGNC:6012]	X	1336616	1382689	p22.33	1
ENSG00000157593	55.14	1.142	0.417	2.741	0.00613416	0.04459	up	SLC35B2	solute carrier family 35 member B2 [Source:HGNC Symbol;Acc:HGNC:16872]	6	44254096	44257890	p21.1	-1
ENSG00000110536	197.229	0.601	0.219	2.736	0.00621801	0.04501	up	PTPMT1	protein tyrosine phosphatase, mitochondrial 1 [Source:HGNC Symbol;Acc:HGNC:26965]	11	47565430	47573461	p11.2	1
ENSG00000148840	87.888	0.793	0.291	2.729	0.00634468	0.04568	up	PPRC1	peroxisome proliferator-activated receptor gamma, coactivator-related 1 [Source:HGNC Symbol;Acc:HGNC:30025]	10	102132994	102150331	q24.32	1
ENSG00000205903	135.211	0.975	0.357	2.729	0.00635653	0.04573	up	ZNF316	zinc finger protein 316 [Source:HGNC Symbol;Acc:HGNC:13843]	7	6637322	6656432	p22.1	1
ENSG00000106244	167.116	0.658	0.242	2.725	0.00643373	0.04603	up	PDAP1	PDGFA associated protein 1 [Source:HGNC Symbol;Acc:HGNC:14634]	7	99392048	99408829	q22.1	-1
ENSG00000170037	85.077	0.925	0.34	2.724	0.00645502	0.04608	up	CNTROB	centrobin, centriole duplication and spindle assembly protein [Source:HGNC Symbol;Acc:HGNC:29616]	17	7932101	7949918	p13.1	1
ENSG00000125730	613.597	0.653	0.24	2.722	0.00647961	0.04622	up	C3	complement C3 [Source:HGNC Symbol;Acc:HGNC:1318]	19	6677704	6730562	p13.3	-1
ENSG00000119777	248.441	0.844	0.311	2.719	0.00655277	0.04665	up	TMEM214	transmembrane protein 214 [Source:HGNC Symbol;Acc:HGNC:25983]	2	27032910	27041695	p23.3	1
ENSG00000149792	170.992	0.97	0.357	2.718	0.00657193	0.04672	up	MRPL49	mitochondrial ribosomal protein L49 [Source:HGNC Symbol;Acc:HGNC:1176]	11	65122183	65127371	q13.1	1
ENSG00000163521	192.976	0.574	0.211	2.717	0.00658095	0.04675	up	GLB1L	galactosidase beta 1 like [Source:HGNC Symbol;Acc:HGNC:28129]	2	219236606	219245478	q35	-1
ENSG00000131446	1592.14	0.468	0.172	2.716	0.00660065	0.04684	up	MGAT1	mannosyl (alpha-1,3-)-glycoprotein beta-1,2-N-acetylglucosaminyltransferase [Source:HGNC Symbol;Acc:HGNC:7044]	5	180784782	180815652	q35.3	-1
ENSG00000014216	74.971	1.448	0.533	2.716	0.00660298	0.04684	up	CAPN1	calpain 1 [Source:HGNC Symbol;Acc:HGNC:1476]	11	65180566	65212006	q13.1	1
ENSG00000137486	797.601	0.431	0.159	2.715	0.00663246	0.04695	up	ARRB1	arrestin beta 1 [Source:HGNC Symbol;Acc:HGNC:711]	11	75264182	75351705	q13.4	-1
ENSG00000140995	371.172	0.581	0.214	2.714	0.00664188	0.04697	up	DEF8	differentially expressed in FDCP 8 homolog [Source:HGNC Symbol;Acc:HGNC:25969]	16	89947925	89968060	q24.3	1
ENSG00000204577	221.604	0.779	0.287	2.714	0.00664466	0.04697	up	LILRB3	leukocyte immunoglobulin like receptor B3 [Source:HGNC Symbol;Acc:HGNC:6607]	19	54216278	54223506	q13.42	-1
ENSG00000167642	51.484	0.938	0.346	2.713	0.00666134	0.04702	up	SPINT2	serine peptidase inhibitor, Kunitz type 2 [Source:HGNC Symbol;Acc:HGNC:11247]	19	38244035	38292614	q13.2	1
ENSG00000203710	724.178	0.379	0.14	2.71	0.0067207	0.04713	up	CR1	complement C3b/C4b receptor 1 (Knops blood group) [Source:HGNC Symbol;Acc:HGNC:2334]	1	207496147	207641765	q32.2	1
ENSG00000136715	471.4	0.383	0.141	2.711	0.00671622	0.04713	up	SAP130	Sin3A associated protein 130 [Source:HGNC Symbol;Acc:HGNC:29813]	2	127941217	128028120	q14.3	-1
ENSG00000215271	452.074	0.387	0.143	2.711	0.00670819	0.04713	up	HOMEZ	homeobox and leucine zipper encoding [Source:HGNC Symbol;Acc:HGNC:20164]	14	23272422	23299447	q11.2	-1
ENSG00000181817	43.825	1.135	0.419	2.711	0.00670121	0.04713	up	LSM10	LSM10, U7 small nuclear RNA associated [Source:HGNC Symbol;Acc:HGNC:17562]	1	36391238	36397892	p34.3	-1
ENSG00000112561	51.83	1.163	0.429	2.712	0.0066857	0.04713	up	TFEB	transcription factor EB [Source:HGNC Symbol;Acc:HGNC:11753]	6	41683978	41736259	p21.1	-1
ENSG00000089327	251.692	1.387	0.512	2.71	0.00672353	0.04713	up	FXYD5	FXYD domain containing ion transport regulator 5 [Source:HGNC Symbol;Acc:HGNC:4029]	19	35154730	35169883	q13.12	1
ENSG00000100979	57.933	1.305	0.482	2.709	0.00674689	0.04723	up	PLTP	phospholipid transfer protein [Source:HGNC Symbol;Acc:HGNC:9093]	20	45898621	45912155	q13.12	-1
ENSG00000130640	282.69	0.531	0.196	2.706	0.00680084	0.04738	up	TUBGCP2	tubulin gamma complex associated protein 2 [Source:HGNC Symbol;Acc:HGNC:18599]	10	133278630	133312337	q26.3	-1
ENSG00000108679	201.347	0.799	0.295	2.707	0.00678066	0.04738	up	LGALS3BP	galectin 3 binding protein [Source:HGNC Symbol;Acc:HGNC:6564]	17	78971238	78980109	q25.3	-1
ENSG00000106266	40.614	1.467	0.542	2.705	0.00682771	0.04754	up	SNX8	sorting nexin 8 [Source:HGNC Symbol;Acc:HGNC:14972]	7	2251770	2354318	p22.3	-1
ENSG00000108828	2899.48	0.758	0.281	2.699	0.00695371	0.04819	up	VAT1	vesicle amine transport 1 [Source:HGNC Symbol;Acc:HGNC:16919]	17	43014605	43025123	q21.31	-1
ENSG00000170522	153.498	0.618	0.229	2.697	0.00700192	0.04835	up	ELOVL6	ELOVL fatty acid elongase 6 [Source:HGNC Symbol;Acc:HGNC:15829]	4	110045846	110199199	q25	-1
ENSG00000179632	101.241	1.135	0.421	2.697	0.00699164	0.04835	up	MAF1	MAF1 homolog, negative regulator of RNA polymerase III [Source:HGNC Symbol;Acc:HGNC:24966]	8	144104499	144107611	q24.3	1
ENSG00000142208	37.593	1.399	0.519	2.696	0.00701226	0.04839	up	AKT1	AKT serine/threonine kinase 1 [Source:HGNC Symbol;Acc:HGNC:391]	14	104769349	104795751	q32.33	-1
ENSG00000143486	334.263	0.425	0.158	2.695	0.00703547	0.04852	up	EIF2D	eukaryotic translation initiation factor 2D [Source:HGNC Symbol;Acc:HGNC:6583]	1	206571292	206612463	q32.1	-1
ENSG00000149182	239.482	0.935	0.347	2.693	0.00708899	0.04881	up	ARFGAP2	ADP ribosylation factor GTPase activating protein 2 [Source:HGNC Symbol;Acc:HGNC:13504]	11	47164299	47177125	p11.2	-1
ENSG00000159377	627.978	0.407	0.151	2.69	0.00715449	0.04902	up	PSMB4	proteasome subunit beta 4 [Source:HGNC Symbol;Acc:HGNC:9541]	1	151399534	151401944	q21.3	1
ENSG00000136930	996.795	0.512	0.19	2.69	0.007155	0.04902	up	PSMB7	proteasome subunit beta 7 [Source:HGNC Symbol;Acc:HGNC:9544]	9	124353466	124415444	q33.3	-1
ENSG00000051009	174.145	0.594	0.221	2.688	0.00718045	0.04902	up	FAM160A2	family with sequence similarity 160 member A2 [Source:HGNC Symbol;Acc:HGNC:25378]	11	6211335	6234711	p15.4	-1
ENSG00000063177	145.251	1.067	0.397	2.689	0.00716191	0.04902	up	RPL18	ribosomal protein L18 [Source:HGNC Symbol;Acc:HGNC:10310]	19	48615328	48619536	q13.33	-1
ENSG00000162413	198.856	0.561	0.209	2.687	0.00720988	0.04912	up	KLHL21	kelch like family member 21 [Source:HGNC Symbol;Acc:HGNC:29041]	1	6590724	6614607	p36.31	-1
ENSG00000213654	214.537	0.92	0.342	2.687	0.0072062	0.04912	up	GPSM3	G protein signaling modulator 3 [Source:HGNC Symbol;Acc:HGNC:13945]	6	32190766	32195523	p21.32	-1
ENSG00000089220	2219.61	0.271	0.101	2.684	0.00728348	0.04949	up	PEBP1	phosphatidylethanolamine binding protein 1 [Source:HGNC Symbol;Acc:HGNC:8630]	12	118135858	118145584	q24.23	1
ENSG00000175309	172.295	0.659	0.246	2.683	0.00728863	0.04949	up	PHYKPL	5-phosphohydroxy-L-lysine phospho-lyase [Source:HGNC Symbol;Acc:HGNC:28249]	5	178208497	178232791	q35.3	-1
