# Supplementary material for: The antibiotic bedaquiline activates host macrophage innate immune resistance to bacterial infection
Source: eLife. 2020 May 4;9:e55692. doi: 10.7554/eLife.55692 (PMC7200153; doi:10.7554/eLife.55692)
Supplement: Figure 1—source data 4. — FDR < 0.05. [file elife-55692-fig1-data4.xlsx]

## Sheet: Feuil1
ensembl_gene_id	baseMean	log2FoldChange	lfcSE	stat	pvalue	padj	direction	hgnc_symbol	description	chromosome_name	start_position	end_position	band	strand
ENSG00000100234	7607.5	-1.239	0.087	-14.235	5.5586e-46	5.639e-42	down	TIMP3	TIMP metallopeptidase inhibitor 3 [Source:HGNC Symbol;Acc:HGNC:11822]	22	32801701	32863043	q12.3	1
ENSG00000175445	40764.4	-1.06	0.081	-13.028	8.5032e-39	4.313e-35	down	LPL	lipoprotein lipase [Source:HGNC Symbol;Acc:HGNC:6677]	8	19901717	19967258	p21.3	1
ENSG00000117525	1215.45	-1.473	0.134	-10.966	5.5597e-28	1.88e-24	down	F3	coagulation factor III, tissue factor [Source:HGNC Symbol;Acc:HGNC:3541]	1	94529225	94541800	p21.3	-1
ENSG00000102760	5026.62	-0.772	0.086	-9.007	2.1203e-19	5.377e-16	down	RGCC	regulator of cell cycle [Source:HGNC Symbol;Acc:HGNC:20369]	13	41457559	41470882	q14.11	1
ENSG00000139318	1880.93	-0.863	0.099	-8.695	3.4776e-18	7.055e-15	down	DUSP6	dual specificity phosphatase 6 [Source:HGNC Symbol;Acc:HGNC:3072]	12	89347232	89353271	q21.33	-1
ENSG00000117228	4018.55	-0.821	0.095	-8.65	5.1478e-18	8.703e-15	down	GBP1	guanylate binding protein 1 [Source:HGNC Symbol;Acc:HGNC:4182]	1	89052319	89065360	p22.2	-1
ENSG00000118971	1098.87	-1.14	0.134	-8.513	1.6999e-17	2.463e-14	down	CCND2	cyclin D2 [Source:HGNC Symbol;Acc:HGNC:1583]	12	4273772	4305350	p13.32	1
ENSG00000102755	3085.28	-0.846	0.1	-8.468	2.4995e-17	2.817e-14	down	FLT1	fms related tyrosine kinase 1 [Source:HGNC Symbol;Acc:HGNC:3763]	13	28300344	28495145	q12.3	-1
ENSG00000169299	3701.14	-0.668	0.079	-8.469	2.4776e-17	2.817e-14	down	PGM2	phosphoglucomutase 2 [Source:HGNC Symbol;Acc:HGNC:8906]	4	37826633	37862937	p14	1
ENSG00000127951	2031.26	-1.063	0.126	-8.411	4.0621e-17	4.121e-14	down	FGL2	fibrinogen like 2 [Source:HGNC Symbol;Acc:HGNC:3696]	7	77193371	77199848	q11.23	-1
ENSG00000146072	1394.15	-0.873	0.105	-8.309	9.6902e-17	8.936e-14	down	TNFRSF21	TNF receptor superfamily member 21 [Source:HGNC Symbol;Acc:HGNC:13469]	6	47231532	47309905	p12.3	-1
ENSG00000132688	565.766	-1.596	0.201	-7.949	1.8791e-15	1.466e-12	down	NES	nestin [Source:HGNC Symbol;Acc:HGNC:7756]	1	156668763	156677397	q23.1	-1
ENSG00000136158	774.101	-0.931	0.117	-7.939	2.0337e-15	1.474e-12	down	SPRY2	sprouty RTK signaling antagonist 2 [Source:HGNC Symbol;Acc:HGNC:11270]	13	80335976	80340951	q31.1	-1
ENSG00000166068	5574.2	-0.839	0.109	-7.697	1.394e-14	9.427e-12	down	SPRED1	sprouty related EVH1 domain containing 1 [Source:HGNC Symbol;Acc:HGNC:20249]	15	38252326	38357249	q14	1
ENSG00000138035	1882.39	-0.897	0.117	-7.674	1.6682e-14	1.034e-11	down	PNPT1	polyribonucleotide nucleotidyltransferase 1 [Source:HGNC Symbol;Acc:HGNC:23166]	2	55634265	55693910	p16.1	-1
ENSG00000139278	5696.34	-0.597	0.078	-7.669	1.7335e-14	1.034e-11	down	GLIPR1	GLI pathogenesis related 1 [Source:HGNC Symbol;Acc:HGNC:17001]	12	75480680	75503853	q21.2	1
ENSG00000143153	6705.16	-0.587	0.077	-7.598	3.0079e-14	1.695e-11	down	ATP1B1	ATPase Na+/K+ transporting subunit beta 1 [Source:HGNC Symbol;Acc:HGNC:804]	1	169105697	169132722	q24.2	1
ENSG00000184009	16486.4	-0.677	0.09	-7.549	4.3788e-14	2.338e-11	down	ACTG1	actin gamma 1 [Source:HGNC Symbol;Acc:HGNC:144]	17	81509971	81523847	q25.3	-1
ENSG00000135905	6155.9	-0.536	0.072	-7.461	8.5752e-14	4.349e-11	down	DOCK10	dedicator of cytokinesis 10 [Source:HGNC Symbol;Acc:HGNC:23479]	2	224765090	225042445	q36.2	-1
ENSG00000175054	2390.05	-0.758	0.102	-7.404	1.3169e-13	6.361e-11	down	ATR	ATR serine/threonine kinase [Source:HGNC Symbol;Acc:HGNC:882]	3	142449235	142578826	q23	-1
ENSG00000133135	392.387	-1.566	0.212	-7.392	1.4461e-13	6.668e-11	down	RNF128	ring finger protein 128, E3 ubiquitin protein ligase [Source:HGNC Symbol;Acc:HGNC:21153]	X	106693794	106796993	q22.3	1
ENSG00000164687	7932.83	-0.678	0.095	-7.173	7.3605e-13	3.246e-10	down	FABP5	fatty acid binding protein 5 [Source:HGNC Symbol;Acc:HGNC:3560]	8	81280363	81284777	q21.13	1
ENSG00000144959	13126.3	-0.593	0.083	-7.145	8.9696e-13	3.791e-10	down	NCEH1	neutral cholesterol ester hydrolase 1 [Source:HGNC Symbol;Acc:HGNC:29260]	3	172630249	172711218	q26.31	-1
ENSG00000183023	2574.99	-0.661	0.093	-7.116	1.1085e-12	4.498e-10	down	SLC8A1	solute carrier family 8 member A1 [Source:HGNC Symbol;Acc:HGNC:11068]	2	40097270	40611053	p22.1	-1
ENSG00000134308	6290.3	-0.602	0.085	-7.095	1.2906e-12	5.035e-10	down	YWHAQ	tyrosine 3-monooxygenase/tryptophan 5-monooxygenase activation protein theta [Source:HGNC Symbol;Acc:HGNC:12854]	2	9583972	9631014	p25.1	-1
ENSG00000050405	1946.32	-0.766	0.109	-7.002	2.5182e-12	9.461e-10	down	LIMA1	LIM domain and actin binding 1 [Source:HGNC Symbol;Acc:HGNC:24636]	12	50175788	50283546	q13.12	-1
ENSG00000110092	2268.97	-0.852	0.122	-6.958	3.448e-12	1.249e-09	down	CCND1	cyclin D1 [Source:HGNC Symbol;Acc:HGNC:1582]	11	69641087	69654474	q13.3	1
ENSG00000171617	569.271	-1.509	0.217	-6.951	3.6202e-12	1.266e-09	down	ENC1	ectodermal-neural cortex 1 [Source:HGNC Symbol;Acc:HGNC:3345]	5	74627406	74641424	q13.3	-1
ENSG00000122643	1795.51	-0.948	0.142	-6.699	2.0966e-11	7.089e-09	down	NT5C3A	5'-nucleotidase, cytosolic IIIA [Source:HGNC Symbol;Acc:HGNC:17820]	7	33014113	33062797	p14.3	-1
ENSG00000136689	8591.49	-0.82	0.123	-6.66	2.7445e-11	8.7e-09	down	IL1RN	interleukin 1 receptor antagonist [Source:HGNC Symbol;Acc:HGNC:6000]	2	113107214	113134016	q14.1	1
ENSG00000058668	2433.22	-0.629	0.096	-6.552	5.684e-11	1.747e-08	down	ATP2B4	ATPase plasma membrane Ca2+ transporting 4 [Source:HGNC Symbol;Acc:HGNC:817]	1	203626561	203744081	q32.1	1
ENSG00000044574	18732.4	-0.541	0.083	-6.495	8.2849e-11	2.472e-08	down	HSPA5	heat shock protein family A (Hsp70) member 5 [Source:HGNC Symbol;Acc:HGNC:5238]	9	125234853	125241330	q33.3	-1
ENSG00000107201	2777.68	-0.93	0.146	-6.375	1.8272e-10	4.918e-08	down	DDX58	DExD/H-box helicase 58 [Source:HGNC Symbol;Acc:HGNC:19102]	9	32455705	32526324	p21.1	-1
ENSG00000001084	8781.09	-0.566	0.089	-6.372	1.8643e-10	4.918e-08	down	GCLC	glutamate-cysteine ligase catalytic subunit [Source:HGNC Symbol;Acc:HGNC:4311]	6	53497341	53616970	p12.1	-1
ENSG00000136167	115301	-0.407	0.064	-6.374	1.8372e-10	4.918e-08	down	LCP1	lymphocyte cytosolic protein 1 [Source:HGNC Symbol;Acc:HGNC:6528]	13	46125920	46211871	q14.13	-1
ENSG00000139289	1836.51	-0.791	0.125	-6.324	2.5432e-10	6e-08	down	PHLDA1	pleckstrin homology like domain family A member 1 [Source:HGNC Symbol;Acc:HGNC:8933]	12	76025447	76033932	q21.2	-1
ENSG00000170017	17350	-0.744	0.118	-6.326	2.5231e-10	6e-08	down	ALCAM	activated leukocyte cell adhesion molecule [Source:HGNC Symbol;Acc:HGNC:400]	3	105366909	105576900	q13.11	1
ENSG00000151704	2097.33	-0.668	0.106	-6.327	2.5021e-10	6e-08	down	KCNJ1	potassium voltage-gated channel subfamily J member 1 [Source:HGNC Symbol;Acc:HGNC:6255]	11	128836315	128867373	q24.3	-1
ENSG00000134333	14710.2	-0.43	0.068	-6.335	2.3743e-10	6e-08	down	LDHA	lactate dehydrogenase A [Source:HGNC Symbol;Acc:HGNC:6535]	11	18394388	18408425	p15.1	1
ENSG00000138670	3471.06	-0.583	0.093	-6.276	3.4738e-10	7.831e-08	down	RASGEF1B	RasGEF domain family member 1B [Source:HGNC Symbol;Acc:HGNC:24881]	4	81426393	82044244	q21.22	-1
ENSG00000144381	8982.5	-0.538	0.086	-6.277	3.4527e-10	7.831e-08	down	HSPD1	heat shock protein family D (Hsp60) member 1 [Source:HGNC Symbol;Acc:HGNC:5261]	2	197486581	197516737	q33.1	-1
ENSG00000034677	2374.65	-0.665	0.106	-6.262	3.8072e-10	8.396e-08	down	RNF19A	ring finger protein 19A, RBR E3 ubiquitin protein ligase [Source:HGNC Symbol;Acc:HGNC:13432]	8	100257060	100336218	q22.2	-1
ENSG00000198763	41742.8	-0.47	0.075	-6.235	4.5067e-10	9.727e-08	down	MT-ND2	mitochondrially encoded NADH:ubiquinone oxidoreductase core subunit 2 [Source:HGNC Symbol;Acc:HGNC:7456]	MT	4470	5511		1
ENSG00000162772	6279.92	-0.664	0.107	-6.228	4.7323e-10	1e-07	down	ATF3	activating transcription factor 3 [Source:HGNC Symbol;Acc:HGNC:785]	1	212565334	212620777	q32.3	1
ENSG00000166923	1157.29	-1.246	0.2	-6.221	4.9329e-10	1.001e-07	down	GREM1	gremlin 1, DAN family BMP antagonist [Source:HGNC Symbol;Acc:HGNC:2001]	15	32717974	32745107	q13.3	1
ENSG00000134061	1148.21	-1.066	0.171	-6.224	4.8348e-10	1.001e-07	down	CD180	CD180 molecule [Source:HGNC Symbol;Acc:HGNC:6726]	5	67179613	67196799	q12.3	-1
ENSG00000031003	5500.53	-0.651	0.105	-6.189	6.0405e-10	1.201e-07	down	FAM13B	family with sequence similarity 13 member B [Source:HGNC Symbol;Acc:HGNC:1335]	5	137937960	138051961	q31.2	-1
ENSG00000138698	2897.09	-0.542	0.088	-6.161	7.2262e-10	1.41e-07	down	RAP1GDS1	Rap1 GTPase-GDP dissociation stimulator 1 [Source:HGNC Symbol;Acc:HGNC:9859]	4	98261384	98443861	q23	1
ENSG00000076716	6832.07	-0.546	0.089	-6.134	8.5964e-10	1.645e-07	down	GPC4	glypican 4 [Source:HGNC Symbol;Acc:HGNC:4452]	X	133300103	133415490	q26.2	-1
ENSG00000111300	1383.12	-0.666	0.109	-6.108	1.0101e-09	1.897e-07	down	NAA25	N(alpha)-acetyltransferase 25, NatB auxiliary subunit [Source:HGNC Symbol;Acc:HGNC:25783]	12	112026689	112109022	q24.13	-1
ENSG00000102763	2177.74	-0.467	0.077	-6.094	1.099e-09	2.027e-07	down	VWA8	von Willebrand factor A domain containing 8 [Source:HGNC Symbol;Acc:HGNC:29071]	13	41566837	41961120	q14.11	-1
ENSG00000141655	1050.37	-0.779	0.128	-6.09	1.131e-09	2.049e-07	down	TNFRSF11A	TNF receptor superfamily member 11a [Source:HGNC Symbol;Acc:HGNC:11908]	18	62325287	62391292	q21.33	1
ENSG00000138185	1760.25	-0.554	0.091	-6.061	1.3549e-09	2.37e-07	down	ENTPD1	ectonucleoside triphosphate diphosphohydrolase 1 [Source:HGNC Symbol;Acc:HGNC:3363]	10	95711779	95869695	q24.1	1
ENSG00000181381	11911.1	-0.593	0.099	-5.985	2.1614e-09	3.594e-07	down	DDX60L	DExD/H-box 60 like [Source:HGNC Symbol;Acc:HGNC:26429]	4	168356735	168537786	q32.3	-1
ENSG00000115738	3805.73	-0.679	0.114	-5.972	2.3451e-09	3.837e-07	down	ID2	inhibitor of DNA binding 2 [Source:HGNC Symbol;Acc:HGNC:5361]	2	8678845	8684453	p25.1	1
ENSG00000157483	3682.9	-0.465	0.078	-5.932	2.9969e-09	4.825e-07	down	MYO1E	myosin IE [Source:HGNC Symbol;Acc:HGNC:7599]	15	59132434	59372900	q22.2	-1
ENSG00000196950	2069.4	-0.711	0.12	-5.908	3.4689e-09	5.498e-07	down	SLC39A10	solute carrier family 39 member 10 [Source:HGNC Symbol;Acc:HGNC:20861]	2	195575977	195737702	q32.3	1
ENSG00000184292	427.53	-1.135	0.193	-5.887	3.9311e-09	6.135e-07	down	TACSTD2	tumor associated calcium signal transducer 2 [Source:HGNC Symbol;Acc:HGNC:11530]	1	58575423	58577773	p32.1	-1
ENSG00000138760	20675.8	-0.444	0.076	-5.842	5.1492e-09	7.914e-07	down	SCARB2	scavenger receptor class B member 2 [Source:HGNC Symbol;Acc:HGNC:1665]	4	76158733	76234536	q21.1	-1
ENSG00000105939	2582.22	-0.636	0.109	-5.827	5.6381e-09	8.536e-07	down	ZC3HAV1	zinc finger CCCH-type containing, antiviral 1 [Source:HGNC Symbol;Acc:HGNC:23721]	7	139043520	139109719	q34	-1
ENSG00000117054	4067.54	-0.692	0.119	-5.8	6.6325e-09	9.894e-07	down	ACADM	acyl-CoA dehydrogenase medium chain [Source:HGNC Symbol;Acc:HGNC:89]	1	75724347	75787575	p31.1	1
ENSG00000119514	1414.21	-0.776	0.134	-5.796	6.7929e-09	9.986e-07	down	GALNT12	polypeptide N-acetylgalactosaminyltransferase 12 [Source:HGNC Symbol;Acc:HGNC:19877]	9	98807699	98850081	q22.33	1
ENSG00000011566	1802.77	-0.712	0.124	-5.742	9.3424e-09	1.335e-06	down	MAP4K3	mitogen-activated protein kinase kinase kinase kinase 3 [Source:HGNC Symbol;Acc:HGNC:6865]	2	39249266	39437312	p22.1	-1
ENSG00000242474	725.707	-0.804	0.14	-5.733	9.89e-09	1.393e-06	down			7	135853	149466	p22.3	-1
ENSG00000166922	1083.87	-0.83	0.145	-5.722	1.0526e-08	1.463e-06	down	SCG5	secretogranin V [Source:HGNC Symbol;Acc:HGNC:10816]	15	32641676	32697098	q13.3	1
ENSG00000115956	28959.3	-0.448	0.078	-5.712	1.1149e-08	1.528e-06	down	PLEK	pleckstrin [Source:HGNC Symbol;Acc:HGNC:9070]	2	68365173	68397453	p14	1
ENSG00000175352	3601.07	-0.406	0.071	-5.693	1.2492e-08	1.69e-06	down	NRIP3	nuclear receptor interacting protein 3 [Source:HGNC Symbol;Acc:HGNC:1167]	11	8980576	9004049	p15.4	-1
ENSG00000107099	5380.41	-0.39	0.069	-5.661	1.5092e-08	2.014e-06	down	DOCK8	dedicator of cytokinesis 8 [Source:HGNC Symbol;Acc:HGNC:19191]	9	214854	465259	p24.3	1
ENSG00000142875	10371.2	-0.647	0.115	-5.628	1.8274e-08	2.4e-06	down	PRKACB	protein kinase cAMP-activated catalytic subunit beta [Source:HGNC Symbol;Acc:HGNC:9381]	1	84078062	84238498	p31.1	1
ENSG00000030066	1972.89	-0.531	0.094	-5.626	1.8457e-08	2.4e-06	down	NUP160	nucleoporin 160 [Source:HGNC Symbol;Acc:HGNC:18017]	11	47778087	47848555	p11.2	-1
ENSG00000141682	340.631	-1.153	0.206	-5.607	2.054e-08	2.637e-06	down	PMAIP1	phorbol-12-myristate-13-acetate-induced protein 1 [Source:HGNC Symbol;Acc:HGNC:9108]	18	59899948	59904306	q21.32	1
ENSG00000095637	172.036	-1.347	0.242	-5.557	2.745e-08	3.481e-06	down	SORBS1	sorbin and SH3 domain containing 1 [Source:HGNC Symbol;Acc:HGNC:14565]	10	95311771	95561414	q24.1	-1
ENSG00000128567	622.868	-0.793	0.143	-5.546	2.9251e-08	3.663e-06	down	PODXL	podocalyxin like [Source:HGNC Symbol;Acc:HGNC:9171]	7	131500262	131558217	q32.3	-1
ENSG00000182957	2477.01	-0.477	0.086	-5.544	2.9631e-08	3.666e-06	down	SPATA13	spermatogenesis associated 13 [Source:HGNC Symbol;Acc:HGNC:23222]	13	23979805	24307074	q12.12	1
ENSG00000177189	6021.79	-0.562	0.101	-5.536	3.1016e-08	3.791e-06	down	RPS6KA3	ribosomal protein S6 kinase A3 [Source:HGNC Symbol;Acc:HGNC:10432]	X	20149911	20267519	p22.12	-1
ENSG00000198727	43054.2	-0.54	0.098	-5.531	3.178e-08	3.838e-06	down	MT-CYB	mitochondrially encoded cytochrome b [Source:HGNC Symbol;Acc:HGNC:7427]	MT	14747	15887		1
ENSG00000137819	447.466	-0.791	0.145	-5.471	4.4724e-08	5.275e-06	down	PAQR5	progestin and adipoQ receptor family member 5 [Source:HGNC Symbol;Acc:HGNC:29645]	15	69298947	69407780	q23	1
ENSG00000240859	1058.18	-0.703	0.129	-5.467	4.5879e-08	5.349e-06	down			7	149597	155465	p22.3	1
ENSG00000087253	4881.08	-0.559	0.102	-5.456	4.8648e-08	5.545e-06	down	LPCAT2	lysophosphatidylcholine acyltransferase 2 [Source:HGNC Symbol;Acc:HGNC:26032]	16	55508998	55586670	q12.2	1
ENSG00000136161	6459.66	-0.547	0.1	-5.458	4.8255e-08	5.545e-06	down	RCBTB2	RCC1 and BTB domain containing protein 2 [Source:HGNC Symbol;Acc:HGNC:1914]	13	48488959	48533256	q14.2	-1
ENSG00000071537	10277.1	-0.413	0.076	-5.422	5.89e-08	6.566e-06	down	SEL1L	SEL1L ERAD E3 ligase adaptor subunit [Source:HGNC Symbol;Acc:HGNC:10717]	14	81471549	81533861	q31.1	-1
ENSG00000104043	3105.54	-0.484	0.089	-5.415	6.1263e-08	6.755e-06	down	ATP8B4	ATPase phospholipid transporting 8B4 (putative) [Source:HGNC Symbol;Acc:HGNC:13536]	15	49858238	50182817	q21.2	-1
ENSG00000113532	685.317	-0.877	0.162	-5.401	6.6339e-08	7.139e-06	down	ST8SIA4	ST8 alpha-N-acetyl-neuraminide alpha-2,8-sialyltransferase 4 [Source:HGNC Symbol;Acc:HGNC:10871]	5	100806935	100903266	q21.1	-1
ENSG00000122877	3807.34	-0.483	0.09	-5.398	6.7561e-08	7.139e-06	down	EGR2	early growth response 2 [Source:HGNC Symbol;Acc:HGNC:3239]	10	62811996	62919900	q21.3	-1
ENSG00000154229	1561.66	-0.481	0.09	-5.333	9.6749e-08	9.717e-06	down	PRKCA	protein kinase C alpha [Source:HGNC Symbol;Acc:HGNC:9393]	17	66302636	66810743	q24.2	1
ENSG00000215301	14327.7	-0.381	0.071	-5.335	9.544e-08	9.717e-06	down	DDX3X	DEAD-box helicase 3, X-linked [Source:HGNC Symbol;Acc:HGNC:2745]	X	41333284	41364472	p11.4	1
ENSG00000128918	2359.01	-0.584	0.11	-5.309	1.1012e-07	1.095e-05	down	ALDH1A2	aldehyde dehydrogenase 1 family member A2 [Source:HGNC Symbol;Acc:HGNC:15472]	15	57953424	58497866	q21.3	-1
ENSG00000097033	9020.1	-0.526	0.099	-5.306	1.1198e-07	1.103e-05	down	SH3GLB1	SH3 domain containing GRB2 like, endophilin B1 [Source:HGNC Symbol;Acc:HGNC:10833]	1	86704570	86748184	p22.3	1
ENSG00000155090	814.397	-0.741	0.14	-5.281	1.2874e-07	1.244e-05	down	KLF10	Kruppel like factor 10 [Source:HGNC Symbol;Acc:HGNC:11810]	8	102648779	102655902	q22.3	-1
ENSG00000177409	11144	-0.561	0.106	-5.273	1.3443e-07	1.286e-05	down	SAMD9L	sterile alpha motif domain containing 9 like [Source:HGNC Symbol;Acc:HGNC:1349]	7	93130055	93148369	q21.2	-1
ENSG00000139132	4513.25	-0.55	0.105	-5.258	1.4546e-07	1.376e-05	down	FGD4	FYVE, RhoGEF and PH domain containing 4 [Source:HGNC Symbol;Acc:HGNC:19125]	12	32399529	32646050	p11.21	1
ENSG00000198899	67211.3	-0.364	0.069	-5.257	1.4652e-07	1.376e-05	down	MT-ATP6	mitochondrially encoded ATP synthase membrane subunit 6 [Source:HGNC Symbol;Acc:HGNC:7414]	MT	8527	9207		1
ENSG00000135363	1010.9	-0.674	0.128	-5.247	1.545e-07	1.438e-05	down	LMO2	LIM domain only 2 [Source:HGNC Symbol;Acc:HGNC:6642]	11	33858576	33892289	p13	-1
ENSG00000099250	8915.68	-0.33	0.063	-5.239	1.6135e-07	1.488e-05	down	NRP1	neuropilin 1 [Source:HGNC Symbol;Acc:HGNC:8004]	10	33177492	33336262	p11.22	-1
ENSG00000141232	2439.2	-0.548	0.105	-5.234	1.6565e-07	1.514e-05	down	TOB1	transducer of ERBB2, 1 [Source:HGNC Symbol;Acc:HGNC:11979]	17	50862223	50867978	q21.33	-1
ENSG00000077420	1594.51	-0.547	0.105	-5.226	1.7315e-07	1.568e-05	down	APBB1IP	amyloid beta precursor protein binding family B member 1 interacting protein [Source:HGNC Symbol;Acc:HGNC:17379]	10	26438203	26567803	p12.1	1
ENSG00000171488	1280.15	-0.577	0.111	-5.21	1.8935e-07	1.7e-05	down	LRRC8C	leucine rich repeat containing 8 VRAC subunit C [Source:HGNC Symbol;Acc:HGNC:25075]	1	89633072	89769903	p22.2	1
ENSG00000103342	4518.69	-0.4	0.077	-5.206	1.9344e-07	1.721e-05	down	GSPT1	G1 to S phase transition 1 [Source:HGNC Symbol;Acc:HGNC:4621]	16	11868128	11916082	p13.13	-1
ENSG00000073737	1148.75	-0.777	0.15	-5.183	2.1776e-07	1.921e-05	down	DHRS9	dehydrogenase/reductase 9 [Source:HGNC Symbol;Acc:HGNC:16888]	2	169064789	169096167	q31.1	1
ENSG00000117899	2422.9	-0.44	0.086	-5.138	2.7755e-07	2.427e-05	down	MESD	mesoderm development LRP chaperone [Source:HGNC Symbol;Acc:HGNC:13520]	15	80946289	80989878	q25.1	-1
ENSG00000134668	336.042	-0.956	0.186	-5.128	2.9286e-07	2.496e-05	down	SPOCD1	SPOC domain containing 1 [Source:HGNC Symbol;Acc:HGNC:26338]	1	31790422	31816051	p35.2	-1
ENSG00000117475	1504.6	-0.55	0.107	-5.13	2.9003e-07	2.496e-05	down	BLZF1	basic leucine zipper nuclear factor 1 [Source:HGNC Symbol;Acc:HGNC:1065]	1	169367970	169396540	q24.2	1
ENSG00000082212	5355.19	-0.446	0.087	-5.109	3.241e-07	2.74e-05	down	ME2	malic enzyme 2 [Source:HGNC Symbol;Acc:HGNC:6984]	18	50878734	50954257	q21.2	1
ENSG00000197147	1025.13	-0.755	0.148	-5.106	3.2941e-07	2.762e-05	down	LRRC8B	leucine rich repeat containing 8 VRAC subunit B [Source:HGNC Symbol;Acc:HGNC:30692]	1	89524836	89597864	p22.2	1
ENSG00000132256	831.664	-0.558	0.109	-5.1	3.3915e-07	2.797e-05	down	TRIM5	tripartite motif containing 5 [Source:HGNC Symbol;Acc:HGNC:16276]	11	5663557	5938619	p15.4	-1
ENSG00000143815	2112.93	-0.607	0.119	-5.094	3.4981e-07	2.862e-05	down	LBR	lamin B receptor [Source:HGNC Symbol;Acc:HGNC:6518]	1	225401502	225428925	q42.12	-1
ENSG00000119326	536.15	-0.81	0.159	-5.084	3.6931e-07	2.973e-05	down	CTNNAL1	catenin alpha like 1 [Source:HGNC Symbol;Acc:HGNC:2512]	9	108942569	109013529	q31.3	-1
ENSG00000067900	10520.3	-0.552	0.109	-5.085	3.6802e-07	2.973e-05	down	ROCK1	Rho associated coiled-coil containing protein kinase 1 [Source:HGNC Symbol;Acc:HGNC:10251]	18	20946906	21111851	q11.1	-1
ENSG00000075624	42168.3	-0.594	0.117	-5.076	3.8518e-07	3.077e-05	down	ACTB	actin beta [Source:HGNC Symbol;Acc:HGNC:132]	7	5527147	5563784	p22.1	-1
ENSG00000148848	781.976	-0.814	0.161	-5.057	4.2609e-07	3.325e-05	down	ADAM12	ADAM metallopeptidase domain 12 [Source:HGNC Symbol;Acc:HGNC:190]	10	126012381	126388455	q26.2	-1
ENSG00000120802	2991.11	-0.682	0.135	-5.041	4.6358e-07	3.563e-05	down	TMPO	thymopoietin [Source:HGNC Symbol;Acc:HGNC:11875]	12	98515512	98550379	q23.1	1
ENSG00000138119	17294.7	-0.324	0.064	-5.026	4.9998e-07	3.785e-05	down	MYOF	myoferlin [Source:HGNC Symbol;Acc:HGNC:3656]	10	93306429	93482317	q23.33	-1
ENSG00000057608	16250.7	-0.412	0.082	-5.01	5.4337e-07	4.053e-05	down	GDI2	GDP dissociation inhibitor 2 [Source:HGNC Symbol;Acc:HGNC:4227]	10	5765223	5842132	p15.1	-1
ENSG00000154127	2976.19	-0.436	0.087	-4.995	5.8895e-07	4.361e-05	down	UBASH3B	ubiquitin associated and SH3 domain containing B [Source:HGNC Symbol;Acc:HGNC:29884]	11	122655675	122814473	q24.1	1
ENSG00000119917	11019.7	-0.666	0.134	-4.988	6.1099e-07	4.427e-05	down	IFIT3	interferon induced protein with tetratricopeptide repeats 3 [Source:HGNC Symbol;Acc:HGNC:5411]	10	89327894	89340971	q23.31	1
ENSG00000138399	2262.36	-0.614	0.123	-4.988	6.096e-07	4.427e-05	down	FASTKD1	FAST kinase domains 1 [Source:HGNC Symbol;Acc:HGNC:26150]	2	169529749	169573875	q31.1	-1
ENSG00000120438	3719.92	-0.427	0.086	-4.985	6.1936e-07	4.456e-05	down	TCP1	t-complex 1 [Source:HGNC Symbol;Acc:HGNC:11655]	6	159778498	159789749	q25.3	-1
ENSG00000166598	33018.1	-0.419	0.084	-4.982	6.2807e-07	4.487e-05	down	HSP90B1	heat shock protein 90 beta family member 1 [Source:HGNC Symbol;Acc:HGNC:12028]	12	103930107	103953645	q23.3	1
ENSG00000119138	1736.31	-0.593	0.119	-4.972	6.6378e-07	4.709e-05	down	KLF9	Kruppel like factor 9 [Source:HGNC Symbol;Acc:HGNC:1123]	9	70384597	70414624	q21.12	-1
ENSG00000096060	3932.53	-0.457	0.092	-4.958	7.1066e-07	4.938e-05	down	FKBP5	FK506 binding protein 5 [Source:HGNC Symbol;Acc:HGNC:3721]	6	35573585	35728583	p21.31	-1
ENSG00000181915	3495.2	-0.593	0.12	-4.953	7.3145e-07	5.013e-05	down	ADO	2-aminoethanethiol dioxygenase [Source:HGNC Symbol;Acc:HGNC:23506]	10	62804857	62808483	q21.3	1
ENSG00000184293	411.004	-0.771	0.156	-4.929	8.2611e-07	5.55e-05	down	CLECL1	C-type lectin like 1 [Source:HGNC Symbol;Acc:HGNC:24462]	12	9715860	9733299	p13.31	-1
ENSG00000164935	18297.4	-0.431	0.088	-4.909	9.1551e-07	6.11e-05	down	DCSTAMP	dendrocyte expressed seven transmembrane protein [Source:HGNC Symbol;Acc:HGNC:18549]	8	104339087	104356689	q22.3	1
ENSG00000137965	4615.33	-0.601	0.123	-4.9	9.5656e-07	6.342e-05	down	IFI44	interferon induced protein 44 [Source:HGNC Symbol;Acc:HGNC:16938]	1	78649796	78664078	p31.1	1
ENSG00000078237	3374.63	-0.602	0.123	-4.883	1.0458e-06	6.801e-05	down	TIGAR	TP53 induced glycolysis regulatory phosphatase [Source:HGNC Symbol;Acc:HGNC:1185]	12	4307763	4354593	p13.32	1
ENSG00000164134	2751.48	-0.566	0.116	-4.872	1.1057e-06	7.144e-05	down	NAA15	N(alpha)-acetyltransferase 15, NatA auxiliary subunit [Source:HGNC Symbol;Acc:HGNC:30782]	4	139301455	139420033	q31.1	1
ENSG00000164924	33285.4	-0.493	0.101	-4.858	1.1878e-06	7.626e-05	down	YWHAZ	tyrosine 3-monooxygenase/tryptophan 5-monooxygenase activation protein zeta [Source:HGNC Symbol;Acc:HGNC:12855]	8	100916525	100953388	q22.3	-1
ENSG00000106804	641.055	-0.798	0.165	-4.848	1.2451e-06	7.894e-05	down	C5	complement C5 [Source:HGNC Symbol;Acc:HGNC:1331]	9	120952335	121050276	q33.2	-1
ENSG00000138642	1529.09	-0.529	0.109	-4.843	1.279e-06	7.959e-05	down	HERC6	HECT and RLD domain containing E3 ubiquitin protein ligase family member 6 [Source:HGNC Symbol;Acc:HGNC:26072]	4	88378739	88443111	q22.1	1
ENSG00000103569	16515.7	-0.345	0.071	-4.827	1.386e-06	8.573e-05	down	AQP9	aquaporin 9 [Source:HGNC Symbol;Acc:HGNC:643]	15	58138169	58185911	q21.3	1
ENSG00000113368	711.165	-0.713	0.148	-4.823	1.413e-06	8.687e-05	down	LMNB1	lamin B1 [Source:HGNC Symbol;Acc:HGNC:6637]	5	126776623	126837020	q23.2	1
ENSG00000155313	3044.73	-0.505	0.105	-4.814	1.4765e-06	8.969e-05	down	USP25	ubiquitin specific peptidase 25 [Source:HGNC Symbol;Acc:HGNC:12624]	21	15730025	15880069	q21.1	1
ENSG00000164164	5164.62	-0.479	0.1	-4.816	1.4677e-06	8.969e-05	down	OTUD4	OTU deubiquitinase 4 [Source:HGNC Symbol;Acc:HGNC:24949]	4	145110838	145180161	q31.21	-1
ENSG00000155380	3164.84	-0.544	0.113	-4.808	1.5246e-06	9.169e-05	down	SLC16A1	solute carrier family 16 member 1 [Source:HGNC Symbol;Acc:HGNC:10922]	1	112911847	112957013	p13.2	-1
ENSG00000163947	1952.71	-0.436	0.091	-4.808	1.5276e-06	9.169e-05	down	ARHGEF3	Rho guanine nucleotide exchange factor 3 [Source:HGNC Symbol;Acc:HGNC:683]	3	56727418	57079329	p14.3	-1
ENSG00000179833	2590.45	-0.452	0.094	-4.794	1.6389e-06	9.722e-05	down	SERTAD2	SERTA domain containing 2 [Source:HGNC Symbol;Acc:HGNC:30784]	2	64631621	64751005	p14	-1
ENSG00000163563	8958.28	-0.451	0.094	-4.795	1.6303e-06	9.722e-05	down	MNDA	myeloid cell nuclear differentiation antigen [Source:HGNC Symbol;Acc:HGNC:7183]	1	158831317	158849506	q23.1	1
ENSG00000110841	1517.88	-0.517	0.108	-4.777	1.7826e-06	0.0001051	down	PPFIBP1	PPFIA binding protein 1 [Source:HGNC Symbol;Acc:HGNC:9249]	12	27523431	27695564	p11.23	1
ENSG00000111530	4790.29	-0.464	0.098	-4.739	2.1453e-06	0.0001258	down	CAND1	cullin associated and neddylation dissociated 1 [Source:HGNC Symbol;Acc:HGNC:30688]	12	67269281	67319951	q14.3	1
ENSG00000167460	15214.9	-0.342	0.072	-4.73	2.2467e-06	0.000131	down	TPM4	tropomyosin 4 [Source:HGNC Symbol;Acc:HGNC:12013]	19	16067021	16103005	p13.12	1
ENSG00000022267	288.249	-1.222	0.26	-4.703	2.5693e-06	0.0001481	down	FHL1	four and a half LIM domains 1 [Source:HGNC Symbol;Acc:HGNC:3702]	X	136146702	136211359	q26.3	1
ENSG00000112308	10235.3	-0.453	0.096	-4.7	2.6062e-06	0.0001485	down	C6orf62	chromosome 6 open reading frame 62 [Source:HGNC Symbol;Acc:HGNC:20998]	6	24704861	24720836	p22.3	-1
ENSG00000152413	548.254	-0.853	0.182	-4.697	2.6341e-06	0.0001488	down	HOMER1	homer scaffolding protein 1 [Source:HGNC Symbol;Acc:HGNC:17512]	5	79372636	79514217	q14.1	-1
ENSG00000185811	1666.4	-0.395	0.084	-4.696	2.6553e-06	0.0001488	down	IKZF1	IKAROS family zinc finger 1 [Source:HGNC Symbol;Acc:HGNC:13176]	7	50304068	50405101	p12.2	1
ENSG00000068305	3798.61	-0.427	0.091	-4.691	2.7231e-06	0.0001517	down	MEF2A	myocyte enhancer factor 2A [Source:HGNC Symbol;Acc:HGNC:6993]	15	99565417	99716466	q26.3	1
ENSG00000115267	4036.98	-0.44	0.094	-4.683	2.8248e-06	0.0001549	down	IFIH1	interferon induced with helicase C domain 1 [Source:HGNC Symbol;Acc:HGNC:18873]	2	162267079	162318703	q24.2	-1
ENSG00000198363	8289.71	-0.483	0.103	-4.68	2.8649e-06	0.0001555	down	ASPH	aspartate beta-hydroxylase [Source:HGNC Symbol;Acc:HGNC:757]	8	61500556	61714640	q12.3	-1
ENSG00000108010	2899.33	-0.439	0.094	-4.68	2.8665e-06	0.0001555	down	GLRX3	glutaredoxin 3 [Source:HGNC Symbol;Acc:HGNC:15987]	10	130136399	130184521	q26.3	1
ENSG00000116489	14438.9	-0.399	0.085	-4.679	2.8829e-06	0.0001556	down	CAPZA1	capping actin protein of muscle Z-line alpha subunit 1 [Source:HGNC Symbol;Acc:HGNC:1488]	1	112619173	112671619	p13.2	1
ENSG00000166451	450.414	-0.682	0.146	-4.672	2.9873e-06	0.0001603	down	CENPN	centromere protein N [Source:HGNC Symbol;Acc:HGNC:30873]	16	81006498	81033114	q23.2	1
ENSG00000139679	1900.88	-0.587	0.126	-4.647	3.3617e-06	0.0001776	down	LPAR6	lysophosphatidic acid receptor 6 [Source:HGNC Symbol;Acc:HGNC:15520]	13	48389567	48444704	q14.2	-1
ENSG00000066294	30234.9	-0.328	0.071	-4.645	3.3991e-06	0.0001787	down	CD84	CD84 molecule [Source:HGNC Symbol;Acc:HGNC:1704]	1	160541095	160579516	q23.3	-1
ENSG00000135932	8500.21	-0.393	0.085	-4.634	3.5952e-06	0.000187	down	CAB39	calcium binding protein 39 [Source:HGNC Symbol;Acc:HGNC:20292]	2	230712845	230821075	q37.1	1
ENSG00000165732	3868.91	-0.478	0.103	-4.626	3.7275e-06	0.0001919	down	DDX21	DExD-box helicase 21 [Source:HGNC Symbol;Acc:HGNC:2744]	10	68956128	68985073	q22.1	1
ENSG00000155115	2204.63	-0.518	0.112	-4.624	3.7616e-06	0.0001927	down	GTF3C6	general transcription factor IIIC subunit 6 [Source:HGNC Symbol;Acc:HGNC:20872]	6	110958560	110967890	q21	1
ENSG00000120539	851.747	-0.611	0.132	-4.619	3.8591e-06	0.000195	down	MASTL	microtubule associated serine/threonine kinase like [Source:HGNC Symbol;Acc:HGNC:19042]	10	27154824	27186924	p12.1	1
ENSG00000118777	921.709	-0.482	0.104	-4.619	3.8648e-06	0.000195	down	ABCG2	ATP binding cassette subfamily G member 2 (Junior blood group) [Source:HGNC Symbol;Acc:HGNC:74]	4	88090264	88231322	q22.1	-1
ENSG00000073711	1982.31	-0.597	0.129	-4.613	3.9664e-06	0.0001991	down	PPP2R3A	protein phosphatase 2 regulatory subunit B''alpha [Source:HGNC Symbol;Acc:HGNC:9307]	3	135965673	136147891	q22.2	1
ENSG00000134294	10619.7	-0.583	0.126	-4.612	3.9847e-06	0.0001991	down	SLC38A2	solute carrier family 38 member 2 [Source:HGNC Symbol;Acc:HGNC:13448]	12	46358189	46372867	q13.11	-1
ENSG00000165240	1715.51	-0.46	0.1	-4.601	4.2088e-06	0.0002093	down	ATP7A	ATPase copper transporting alpha [Source:HGNC Symbol;Acc:HGNC:869]	X	77910656	78050395	q21.1	1
ENSG00000154359	779.281	-0.554	0.12	-4.597	4.2819e-06	0.0002119	down	LONRF1	LON peptidase N-terminal domain and ring finger 1 [Source:HGNC Symbol;Acc:HGNC:26302]	8	12721894	12756073	p23.1	-1
ENSG00000177200	5405.07	-0.462	0.101	-4.59	4.435e-06	0.0002176	down	CHD9	chromodomain helicase DNA binding protein 9 [Source:HGNC Symbol;Acc:HGNC:25701]	16	53055033	53329150	q12.2	1
ENSG00000146731	5659.32	-0.393	0.086	-4.555	5.2409e-06	0.0002508	down	CCT6A	chaperonin containing TCP1 subunit 6A [Source:HGNC Symbol;Acc:HGNC:1620]	7	56051630	56063989	p11.2	1
ENSG00000164109	423.795	-0.985	0.216	-4.549	5.3786e-06	0.0002562	down	MAD2L1	mitotic arrest deficient 2 like 1 [Source:HGNC Symbol;Acc:HGNC:6763]	4	120055608	120067074	q27	-1
ENSG00000198604	3828.64	-0.487	0.107	-4.543	5.5532e-06	0.0002631	down	BAZ1A	bromodomain adjacent to zinc finger domain 1A [Source:HGNC Symbol;Acc:HGNC:960]	14	34752731	34875647	q13.2	-1
ENSG00000135316	6228.26	-0.45	0.099	-4.542	5.5767e-06	0.0002631	down	SYNCRIP	synaptotagmin binding cytoplasmic RNA interacting protein [Source:HGNC Symbol;Acc:HGNC:16918]	6	85607785	85643792	q14.3	-1
ENSG00000198829	8342.11	-0.572	0.127	-4.517	6.2685e-06	0.000293	down	SUCNR1	succinate receptor 1 [Source:HGNC Symbol;Acc:HGNC:4542]	3	151873643	151884619	q25.1	1
ENSG00000102804	2944.81	-0.478	0.106	-4.487	7.2099e-06	0.0003318	down	TSC22D1	TSC22 domain family member 1 [Source:HGNC Symbol;Acc:HGNC:16826]	13	44432143	44577147	q14.11	-1
ENSG00000143924	10721.4	-0.369	0.082	-4.487	7.2295e-06	0.0003318	down	EML4	echinoderm microtubule associated protein like 4 [Source:HGNC Symbol;Acc:HGNC:1316]	2	42169350	42332548	p21	1
ENSG00000143933	19399.8	-0.453	0.101	-4.48	7.4599e-06	0.0003409	down	CALM2	calmodulin 2 [Source:HGNC Symbol;Acc:HGNC:1445]	2	47160082	47176601	p21	-1
ENSG00000154518	5839.88	-0.348	0.078	-4.477	7.569e-06	0.0003428	down	ATP5MC3	ATP synthase membrane subunit c locus 3 [Source:HGNC Symbol;Acc:HGNC:843]	2	175176258	175184607	q31.1	-1
ENSG00000155011	97.498	-2.284	0.51	-4.475	7.6244e-06	0.0003437	down	DKK2	dickkopf WNT signaling pathway inhibitor 2 [Source:HGNC Symbol;Acc:HGNC:2892]	4	106921802	107283806	q25	-1
ENSG00000151247	1735.31	-0.477	0.107	-4.469	7.8751e-06	0.0003535	down	EIF4E	eukaryotic translation initiation factor 4E [Source:HGNC Symbol;Acc:HGNC:3287]	4	98871684	98930637	q23	-1
ENSG00000115525	2024.17	-0.4	0.09	-4.466	7.9874e-06	0.0003569	down	ST3GAL5	ST3 beta-galactoside alpha-2,3-sialyltransferase 5 [Source:HGNC Symbol;Acc:HGNC:10872]	2	85837120	85905199	p11.2	-1
ENSG00000121858	556.512	-1.058	0.238	-4.454	8.4234e-06	0.0003731	down	TNFSF10	TNF superfamily member 10 [Source:HGNC Symbol;Acc:HGNC:11925]	3	172505508	172523507	q26.31	-1
ENSG00000182481	3476.19	-0.31	0.07	-4.451	8.5456e-06	0.0003769	down	KPNA2	karyopherin subunit alpha 2 [Source:HGNC Symbol;Acc:HGNC:6395]	17	68035519	68046842	q24.2	1
ENSG00000124207	2809.2	-0.506	0.114	-4.444	8.839e-06	0.0003882	down	CSE1L	chromosome segregation 1 like [Source:HGNC Symbol;Acc:HGNC:2431]	20	49046246	49096960	q13.13	1
ENSG00000258227	5215.93	-0.48	0.108	-4.442	8.9015e-06	0.0003892	down	CLEC5A	C-type lectin domain containing 5A [Source:HGNC Symbol;Acc:HGNC:2054]	7	141927357	141947007	q34	-1
ENSG00000145715	2630.78	-0.504	0.114	-4.438	9.0625e-06	0.0003929	down	RASA1	RAS p21 protein activator 1 [Source:HGNC Symbol;Acc:HGNC:9871]	5	87267888	87391931	q14.3	1
ENSG00000163655	1189.58	-0.521	0.117	-4.434	9.2482e-06	0.0003992	down	GMPS	guanine monophosphate synthase [Source:HGNC Symbol;Acc:HGNC:4378]	3	155870536	155944026	q25.31	1
ENSG00000151490	4216.2	-0.334	0.076	-4.412	1.0236e-05	0.00044	down	PTPRO	protein tyrosine phosphatase, receptor type O [Source:HGNC Symbol;Acc:HGNC:9678]	12	15322397	15597399	p12.3	1
ENSG00000111817	2521.34	-0.349	0.079	-4.398	1.0949e-05	0.0004667	down	DSE	dermatan sulfate epimerase [Source:HGNC Symbol;Acc:HGNC:21144]	6	116254173	116444860	q22.1	1
ENSG00000205339	7830.26	-0.454	0.103	-4.391	1.126e-05	0.0004779	down	IPO7	importin 7 [Source:HGNC Symbol;Acc:HGNC:9852]	11	9384622	9448126	p15.4	1
ENSG00000170144	5746.03	-0.314	0.072	-4.387	1.1483e-05	0.0004833	down	HNRNPA3	heterogeneous nuclear ribonucleoprotein A3 [Source:HGNC Symbol;Acc:HGNC:24941]	2	177212563	177223958	q31.2	1
ENSG00000171848	1408.64	-0.741	0.169	-4.384	1.1655e-05	0.0004865	down	RRM2	ribonucleotide reductase regulatory subunit M2 [Source:HGNC Symbol;Acc:HGNC:10452]	2	10120698	10131419	p25.1	1
ENSG00000128641	1225.14	-0.76	0.174	-4.382	1.1766e-05	0.000489	down	MYO1B	myosin IB [Source:HGNC Symbol;Acc:HGNC:7596]	2	191245185	191425389	q32.3	1
ENSG00000091317	14251.8	-0.472	0.108	-4.381	1.1809e-05	0.000489	down	CMTM6	CKLF like MARVEL transmembrane domain containing 6 [Source:HGNC Symbol;Acc:HGNC:19177]	3	32481312	32503408	p22.3	-1
ENSG00000188641	5262.26	-0.356	0.082	-4.361	1.293e-05	0.000531	down	DPYD	dihydropyrimidine dehydrogenase [Source:HGNC Symbol;Acc:HGNC:3012]	1	97077743	97995000	p21.3	-1
ENSG00000112249	2979.29	-0.447	0.103	-4.356	1.3228e-05	0.0005411	down	ASCC3	activating signal cointegrator 1 complex subunit 3 [Source:HGNC Symbol;Acc:HGNC:18697]	6	100508194	100881372	q16.3	-1
ENSG00000171659	3622.03	-0.541	0.124	-4.353	1.3427e-05	0.000547	down	GPR34	G protein-coupled receptor 34 [Source:HGNC Symbol;Acc:HGNC:4490]	X	41688973	41697277	p11.4	1
ENSG00000261269	1554.19	-0.487	0.112	-4.349	1.3667e-05	0.0005531	down			5	72439903	72442387	q13.2	-1
ENSG00000006576	2858.63	-0.512	0.118	-4.347	1.3779e-05	0.0005546	down	PHTF2	putative homeodomain transcription factor 2 [Source:HGNC Symbol;Acc:HGNC:13411]	7	77798792	77957503	q11.23	1
ENSG00000120594	16895.9	-0.392	0.09	-4.343	1.4056e-05	0.0005636	down	PLXDC2	plexin domain containing 2 [Source:HGNC Symbol;Acc:HGNC:21013]	10	19816239	20289856	p12.31	1
ENSG00000068366	10434	-0.504	0.116	-4.338	1.4403e-05	0.0005752	down	ACSL4	acyl-CoA synthetase long chain family member 4 [Source:HGNC Symbol;Acc:HGNC:3571]	X	109624244	109733403	q23	-1
ENSG00000178105	582.382	-0.577	0.133	-4.333	1.47e-05	0.000578	down	DDX10	DEAD-box helicase 10 [Source:HGNC Symbol;Acc:HGNC:2735]	11	108665025	108940930	q22.3	1
ENSG00000169018	8355.73	-0.499	0.115	-4.328	1.5025e-05	0.0005885	down	FEM1B	fem-1 homolog B [Source:HGNC Symbol;Acc:HGNC:3649]	15	68277803	68295865	q23	1
ENSG00000167004	12587.1	-0.315	0.073	-4.327	1.5114e-05	0.0005897	down	PDIA3	protein disulfide isomerase family A member 3 [Source:HGNC Symbol;Acc:HGNC:4606]	15	43746392	43773279	q15.3	1
ENSG00000178202	541.235	-0.674	0.156	-4.321	1.5501e-05	0.0006013	down	KDELC2	KDEL motif containing 2 [Source:HGNC Symbol;Acc:HGNC:28496]	11	108472105	108498432	q22.3	-1
ENSG00000033867	2270.48	-0.55	0.128	-4.308	1.6449e-05	0.0006297	down	SLC4A7	solute carrier family 4 member 7 [Source:HGNC Symbol;Acc:HGNC:11033]	3	27372721	27484420	p24.1	-1
ENSG00000116750	1244.89	-0.555	0.129	-4.307	1.6563e-05	0.0006316	down	UCHL5	ubiquitin C-terminal hydrolase L5 [Source:HGNC Symbol;Acc:HGNC:19678]	1	193012250	193060080	q31.2	-1
ENSG00000116711	1213.56	-0.543	0.126	-4.3	1.707e-05	0.0006485	down	PLA2G4A	phospholipase A2 group IVA [Source:HGNC Symbol;Acc:HGNC:9035]	1	186828953	186988981	q31.1	1
ENSG00000138095	5069.88	-0.424	0.099	-4.284	1.8344e-05	0.0006874	down	LRPPRC	leucine rich pentatricopeptide repeat containing [Source:HGNC Symbol;Acc:HGNC:15714]	2	43886508	43996005	p21	-1
ENSG00000062650	3469.9	-0.39	0.091	-4.284	1.8364e-05	0.0006874	down	WAPL	WAPL cohesin release factor [Source:HGNC Symbol;Acc:HGNC:23293]	10	86435256	86521815	q23.2	-1
ENSG00000165629	5557.56	-0.341	0.08	-4.281	1.8567e-05	0.0006925	down	ATP5F1C	ATP synthase F1 subunit gamma [Source:HGNC Symbol;Acc:HGNC:833]	10	7788129	7807815	p14	1
ENSG00000143889	1662.78	-0.394	0.092	-4.279	1.8746e-05	0.0006965	down	HNRNPLL	heterogeneous nuclear ribonucleoprotein L like [Source:HGNC Symbol;Acc:HGNC:25127]	2	38561978	38603586	p22.1	-1
ENSG00000156535	4569.19	-0.407	0.095	-4.277	1.8928e-05	0.0007007	down	CD109	CD109 molecule [Source:HGNC Symbol;Acc:HGNC:21685]	6	73695785	73828316	q13	1
ENSG00000186188	128.64	-1.21	0.283	-4.271	1.9423e-05	0.0007139	down	FFAR4	free fatty acid receptor 4 [Source:HGNC Symbol;Acc:HGNC:19061]	10	93566665	93604480	q23.33	1
ENSG00000168827	2028.32	-0.403	0.094	-4.266	1.9939e-05	0.0007302	down	GFM1	G elongation factor mitochondrial 1 [Source:HGNC Symbol;Acc:HGNC:13780]	3	158644278	158692575	q25.32	1
ENSG00000089006	4948.73	-0.351	0.082	-4.263	2.0177e-05	0.0007362	down	SNX5	sorting nexin 5 [Source:HGNC Symbol;Acc:HGNC:14969]	20	17941597	17968980	p11.23	-1
ENSG00000101608	9531.47	-0.284	0.067	-4.262	2.0289e-05	0.0007377	down	MYL12A	myosin light chain 12A [Source:HGNC Symbol;Acc:HGNC:16701]	18	3247481	3256236	p11.31	1
ENSG00000198886	164443	-0.337	0.079	-4.254	2.1022e-05	0.0007535	down	MT-ND4	mitochondrially encoded NADH:ubiquinone oxidoreductase core subunit 4 [Source:HGNC Symbol;Acc:HGNC:7459]	MT	10760	12137		1
ENSG00000055208	4172.48	-0.353	0.083	-4.253	2.1135e-05	0.0007549	down	TAB2	TGF-beta activated kinase 1/MAP3K7 binding protein 2 [Source:HGNC Symbol;Acc:HGNC:17075]	6	149218641	149411613	q25.1	1
ENSG00000205413	4962.89	-0.681	0.16	-4.251	2.131e-05	0.0007585	down	SAMD9	sterile alpha motif domain containing 9 [Source:HGNC Symbol;Acc:HGNC:1348]	7	93099513	93118023	q21.2	-1
ENSG00000124795	5585.15	-0.526	0.124	-4.238	2.255e-05	0.000797	down	DEK	DEK proto-oncogene [Source:HGNC Symbol;Acc:HGNC:2768]	6	18223868	18264823	p22.3	-1
ENSG00000068878	3715.76	-0.373	0.088	-4.234	2.2989e-05	0.0008069	down	PSME4	proteasome activator subunit 4 [Source:HGNC Symbol;Acc:HGNC:20635]	2	53864067	53970840	p16.2	-1
ENSG00000101166	1705.19	-0.419	0.099	-4.228	2.3576e-05	0.0008247	down	PRELID3B	PRELI domain containing 3B [Source:HGNC Symbol;Acc:HGNC:15892]	20	59033145	59042909	q13.32	-1
ENSG00000198668	10046	-0.315	0.074	-4.225	2.3848e-05	0.0008313	down	CALM1	calmodulin 1 [Source:HGNC Symbol;Acc:HGNC:1442]	14	90396502	90408261	q32.11	1
ENSG00000041357	4575.14	-0.377	0.089	-4.216	2.4915e-05	0.0008655	down	PSMA4	proteasome subunit alpha 4 [Source:HGNC Symbol;Acc:HGNC:9533]	15	78540405	78552419	q25.1	1
ENSG00000174013	1019.85	-0.54	0.128	-4.211	2.54e-05	0.0008745	down	FBXO45	F-box protein 45 [Source:HGNC Symbol;Acc:HGNC:29148]	3	196568611	196589059	q29	1
ENSG00000116473	6626.99	-0.394	0.094	-4.211	2.543e-05	0.0008745	down	RAP1A	RAP1A, member of RAS oncogene family [Source:HGNC Symbol;Acc:HGNC:9855]	1	111542218	111716691	p13.2	1
ENSG00000165637	2296.76	-0.373	0.089	-4.209	2.5641e-05	0.0008787	down	VDAC2	voltage dependent anion channel 2 [Source:HGNC Symbol;Acc:HGNC:12672]	10	75210154	75231448	q22.2	1
ENSG00000270069	263.794	-1.05	0.25	-4.206	2.6014e-05	0.0008885	down	MIR222HG	MIR222 host gene [Source:HGNC Symbol;Acc:HGNC:49555]	X	45745211	45770274	p11.3	-1
ENSG00000198836	4321.01	-0.411	0.098	-4.202	2.6445e-05	0.0009002	down	OPA1	OPA1, mitochondrial dynamin like GTPase [Source:HGNC Symbol;Acc:HGNC:8140]	3	193593144	193697823	q29	1
ENSG00000235897	972.487	-0.509	0.121	-4.197	2.7051e-05	0.0009146	down	TM4SF19-AS1	TM4SF19 antisense RNA 1 [Source:HGNC Symbol;Acc:HGNC:41085]	3	196318330	196325570	q29	1
ENSG00000120963	3414.45	-0.384	0.092	-4.197	2.7007e-05	0.0009146	down	ZNF706	zinc finger protein 706 [Source:HGNC Symbol;Acc:HGNC:24992]	8	101177878	101206193	q22.3	-1
ENSG00000141367	30679.6	-0.296	0.071	-4.189	2.8024e-05	0.0009382	down	CLTC	clathrin heavy chain [Source:HGNC Symbol;Acc:HGNC:2092]	17	59619689	59696956	q23.1	1
ENSG00000082269	589.369	-0.594	0.142	-4.187	2.8292e-05	0.0009441	down	FAM135A	family with sequence similarity 135 member A [Source:HGNC Symbol;Acc:HGNC:21084]	6	70412941	70561174	q13	1
ENSG00000116062	1077.32	-0.467	0.112	-4.182	2.888e-05	0.0009605	down	MSH6	mutS homolog 6 [Source:HGNC Symbol;Acc:HGNC:7329]	2	47695530	47810101	p16.3	1
ENSG00000170323	665.387	-0.76	0.182	-4.181	2.9072e-05	0.0009606	down	FABP4	fatty acid binding protein 4 [Source:HGNC Symbol;Acc:HGNC:3559]	8	81478419	81483263	q21.13	-1
ENSG00000123505	7072.59	-0.451	0.108	-4.181	2.9067e-05	0.0009606	down	AMD1	adenosylmethionine decarboxylase 1 [Source:HGNC Symbol;Acc:HGNC:457]	6	110874770	110895713	q21	1
ENSG00000155846	1390.99	-0.476	0.114	-4.179	2.9294e-05	0.0009648	down	PPARGC1B	PPARG coactivator 1 beta [Source:HGNC Symbol;Acc:HGNC:30022]	5	149730298	149855022	q32	1
ENSG00000153827	10236.4	-0.261	0.062	-4.176	2.9631e-05	0.0009727	down	TRIP12	thyroid hormone receptor interactor 12 [Source:HGNC Symbol;Acc:HGNC:12306]	2	229763838	229923239	q36.3	-1
ENSG00000173193	9941.88	-0.472	0.113	-4.174	2.9981e-05	0.000981	down	PARP14	poly(ADP-ribose) polymerase family member 14 [Source:HGNC Symbol;Acc:HGNC:29232]	3	122680618	122730840	q21.1	1
ENSG00000119508	1570.06	-0.554	0.133	-4.171	3.0295e-05	0.0009881	down	NR4A3	nuclear receptor subfamily 4 group A member 3 [Source:HGNC Symbol;Acc:HGNC:7982]	9	99821855	99866891	q31.1	1
ENSG00000170385	7087.94	-0.503	0.121	-4.152	3.3003e-05	0.001066	down	SLC30A1	solute carrier family 30 member 1 [Source:HGNC Symbol;Acc:HGNC:11012]	1	211571568	211578742	q32.3	-1
ENSG00000114098	1467.56	-0.409	0.099	-4.15	3.3291e-05	0.001072	down	ARMC8	armadillo repeat containing 8 [Source:HGNC Symbol;Acc:HGNC:24999]	3	138187248	138298389	q22.3	1
ENSG00000164327	1828.11	-0.498	0.12	-4.134	3.5657e-05	0.001137	down	RICTOR	RPTOR independent companion of MTOR complex 2 [Source:HGNC Symbol;Acc:HGNC:28611]	5	38937919	39074408	p13.1	-1
ENSG00000139970	1159.94	-0.403	0.098	-4.12	3.7948e-05	0.001207	down	RTN1	reticulon 1 [Source:HGNC Symbol;Acc:HGNC:10467]	14	59595976	59870966	q23.1	-1
ENSG00000096968	1716.35	-0.5	0.121	-4.112	3.9246e-05	0.001244	down	JAK2	Janus kinase 2 [Source:HGNC Symbol;Acc:HGNC:6192]	9	4984390	5128183	p24.1	1
ENSG00000137055	1718.95	-0.436	0.106	-4.11	3.952e-05	0.001245	down	PLAA	phospholipase A2 activating protein [Source:HGNC Symbol;Acc:HGNC:9043]	9	26904083	26947463	p21.2	-1
ENSG00000123700	353.958	-0.666	0.162	-4.108	3.9976e-05	0.001255	down	KCNJ2	potassium voltage-gated channel subfamily J member 2 [Source:HGNC Symbol;Acc:HGNC:6263]	17	70168673	70180048	q24.3	1
ENSG00000119203	1724.47	-0.393	0.096	-4.104	4.0609e-05	0.001271	down	CPSF3	cleavage and polyadenylation specific factor 3 [Source:HGNC Symbol;Acc:HGNC:2326]	2	9423568	9473101	p25.1	1
ENSG00000116459	5342.59	-0.316	0.077	-4.1	4.1239e-05	0.001287	down	ATP5PB	ATP synthase peripheral stalk-membrane subunit b [Source:HGNC Symbol;Acc:HGNC:840]	1	111448864	111462773	p13.2	1
ENSG00000174021	1657.03	-0.43	0.105	-4.098	4.1732e-05	0.001291	down	GNG5	G protein subunit gamma 5 [Source:HGNC Symbol;Acc:HGNC:4408]	1	84498325	84506565	p22.3	-1
ENSG00000001036	2733.93	-0.32	0.078	-4.092	4.2787e-05	0.001311	down	FUCA2	alpha-L-fucosidase 2 [Source:HGNC Symbol;Acc:HGNC:4008]	6	143494811	143511690	q24.2	-1
ENSG00000048052	710.84	-0.562	0.137	-4.091	4.2943e-05	0.001312	down	HDAC9	histone deacetylase 9 [Source:HGNC Symbol;Acc:HGNC:14065]	7	18086949	19002416	p21.1	1
ENSG00000159200	1532.68	-0.518	0.127	-4.089	4.3277e-05	0.001314	down	RCAN1	regulator of calcineurin 1 [Source:HGNC Symbol;Acc:HGNC:3040]	21	34513142	34615142	q22.12	-1
ENSG00000138496	6113.81	-0.432	0.106	-4.089	4.3259e-05	0.001314	down	PARP9	poly(ADP-ribose) polymerase family member 9 [Source:HGNC Symbol;Acc:HGNC:24118]	3	122527924	122564577	q21.1	-1
ENSG00000110321	43247.2	-0.28	0.068	-4.086	4.3864e-05	0.001328	down	EIF4G2	eukaryotic translation initiation factor 4 gamma 2 [Source:HGNC Symbol;Acc:HGNC:3297]	11	10797050	10809110	p15.4	-1
ENSG00000149635	459.781	-0.916	0.225	-4.078	4.5352e-05	0.001369	down	OCSTAMP	osteoclast stimulatory transmembrane protein [Source:HGNC Symbol;Acc:HGNC:16116]	20	46540946	46550574	q13.12	-1
ENSG00000152642	617.152	-0.629	0.154	-4.075	4.596e-05	0.001383	down	GPD1L	glycerol-3-phosphate dehydrogenase 1 like [Source:HGNC Symbol;Acc:HGNC:28956]	3	32105689	32168713	p22.3	1
ENSG00000221914	1503.04	-0.412	0.101	-4.075	4.6081e-05	0.001383	down	PPP2R2A	protein phosphatase 2 regulatory subunit Balpha [Source:HGNC Symbol;Acc:HGNC:9304]	8	26291491	26372680	p21.2	1
ENSG00000120694	7192.45	-0.459	0.113	-4.074	4.6236e-05	0.001384	down	HSPH1	heat shock protein family H (Hsp110) member 1 [Source:HGNC Symbol;Acc:HGNC:16969]	13	31134974	31162388	q12.3	-1
ENSG00000048828	5014.15	-0.422	0.104	-4.06	4.912e-05	0.001466	down	FAM120A	family with sequence similarity 120A [Source:HGNC Symbol;Acc:HGNC:13247]	9	93451722	93566107	q22.31	1
ENSG00000047315	4447.52	-0.319	0.079	-4.058	4.9402e-05	0.00147	down	POLR2B	RNA polymerase II subunit B [Source:HGNC Symbol;Acc:HGNC:9188]	4	56977722	57031168	q12	1
ENSG00000119396	5610.46	-0.45	0.111	-4.056	5.0024e-05	0.001484	down	RAB14	RAB14, member RAS oncogene family [Source:HGNC Symbol;Acc:HGNC:16524]	9	121178137	121223014	q33.2	-1
ENSG00000173915	1366.63	-0.43	0.106	-4.053	5.0652e-05	0.001498	down	ATP5MD	ATP synthase membrane subunit DAPIT [Source:HGNC Symbol;Acc:HGNC:30889]	10	103389041	103396466	q24.33	-1
ENSG00000153560	2227.86	-0.394	0.097	-4.05	5.1205e-05	0.001506	down	UBP1	upstream binding protein 1 [Source:HGNC Symbol;Acc:HGNC:12507]	3	33388336	33441371	p22.3	-1
ENSG00000082153	6975.92	-0.361	0.089	-4.049	5.1393e-05	0.001507	down	BZW1	basic leucine zipper and W2 domains 1 [Source:HGNC Symbol;Acc:HGNC:18380]	2	200810594	200827338	q33.1	1
ENSG00000065150	2424.86	-0.388	0.096	-4.048	5.1726e-05	0.001508	down	IPO5	importin 5 [Source:HGNC Symbol;Acc:HGNC:6402]	13	97953658	98024297	q32.2	1
ENSG00000134371	2170.03	-0.369	0.091	-4.042	5.2953e-05	0.001538	down	CDC73	cell division cycle 73 [Source:HGNC Symbol;Acc:HGNC:16783]	1	193121997	193253901	q31.2	1
ENSG00000165264	1192.52	-0.684	0.169	-4.039	5.362e-05	0.00155	down	NDUFB6	NADH:ubiquinone oxidoreductase subunit B6 [Source:HGNC Symbol;Acc:HGNC:7701]	9	32552999	32573184	p21.1	-1
ENSG00000138231	632.21	-0.529	0.131	-4.037	5.4026e-05	0.001557	down	DBR1	debranching RNA lariats 1 [Source:HGNC Symbol;Acc:HGNC:15594]	3	138161012	138174949	q22.3	-1
ENSG00000121579	6885.89	-0.474	0.118	-4.032	5.5345e-05	0.00159	down	NAA50	N(alpha)-acetyltransferase 50, NatE catalytic subunit [Source:HGNC Symbol;Acc:HGNC:29533]	3	113716460	113746300	q13.31	-1
ENSG00000132646	1992.56	-0.482	0.12	-4.028	5.6164e-05	0.001609	down	PCNA	proliferating cell nuclear antigen [Source:HGNC Symbol;Acc:HGNC:8729]	20	5114953	5126626	p12.3	-1
ENSG00000065882	3248.47	-0.361	0.09	-4.024	5.7325e-05	0.001638	down	TBC1D1	TBC1 domain family member 1 [Source:HGNC Symbol;Acc:HGNC:11578]	4	37891087	38139175	p14	1
ENSG00000103121	727.428	-0.459	0.114	-4.019	5.839e-05	0.001664	down	CMC2	C-X9-C motif containing 2 [Source:HGNC Symbol;Acc:HGNC:24447]	16	80966448	81020270	q23.2	-1
ENSG00000130935	1063.97	-0.468	0.117	-4.017	5.8988e-05	0.001671	down	NOL11	nucleolar protein 11 [Source:HGNC Symbol;Acc:HGNC:24557]	17	67717833	67744531	q24.2	1
ENSG00000155561	2006.49	-0.334	0.083	-4.017	5.8959e-05	0.001671	down	NUP205	nucleoporin 205 [Source:HGNC Symbol;Acc:HGNC:18658]	7	135557919	135648757	q33	1
ENSG00000140526	4794.74	-0.256	0.064	-4.015	5.94e-05	0.001678	down	ABHD2	abhydrolase domain containing 2 [Source:HGNC Symbol;Acc:HGNC:18717]	15	89087459	89202360	q26.1	1
ENSG00000156261	6837.56	-0.347	0.086	-4.014	5.9735e-05	0.001683	down	CCT8	chaperonin containing TCP1 subunit 8 [Source:HGNC Symbol;Acc:HGNC:1623]	21	29055805	29073797	q21.3	-1
ENSG00000198018	653.868	-0.475	0.118	-4.009	6.0968e-05	0.001713	down	ENTPD7	ectonucleoside triphosphate diphosphohydrolase 7 [Source:HGNC Symbol;Acc:HGNC:19745]	10	99659506	99706240	q24.2	1
ENSG00000163788	764.213	-0.518	0.129	-4.008	6.1166e-05	0.001714	down	SNRK	SNF related kinase [Source:HGNC Symbol;Acc:HGNC:30598]	3	43286512	43424764	p22.1	1
ENSG00000023228	5731.61	-0.267	0.067	-4.007	6.1424e-05	0.001716	down	NDUFS1	NADH:ubiquinone oxidoreductase core subunit S1 [Source:HGNC Symbol;Acc:HGNC:7707]	2	206114817	206159603	q33.3	-1
ENSG00000139116	620.285	-0.574	0.143	-4.006	6.1779e-05	0.001722	down	KIF21A	kinesin family member 21A [Source:HGNC Symbol;Acc:HGNC:19349]	12	39293228	39443390	q12	-1
ENSG00000091483	3645	-0.338	0.084	-4	6.3388e-05	0.001752	down	FH	fumarate hydratase [Source:HGNC Symbol;Acc:HGNC:3700]	1	241497603	241519761	q43	-1
ENSG00000138385	3578.96	-0.455	0.114	-3.989	6.635e-05	0.001819	down	SSB	Sjogren syndrome antigen B [Source:HGNC Symbol;Acc:HGNC:11316]	2	169791933	169812064	q31.1	1
ENSG00000145386	659.125	-0.742	0.186	-3.984	6.7857e-05	0.001855	down	CCNA2	cyclin A2 [Source:HGNC Symbol;Acc:HGNC:1578]	4	121816444	121823933	q27	-1
ENSG00000141664	3678.98	-0.336	0.084	-3.983	6.8168e-05	0.001859	down	ZCCHC2	zinc finger CCHC-type containing 2 [Source:HGNC Symbol;Acc:HGNC:22916]	18	62523007	62587709	q21.33	1
ENSG00000116667	675.273	-0.651	0.164	-3.979	6.924e-05	0.001873	down	C1orf21	chromosome 1 open reading frame 21 [Source:HGNC Symbol;Acc:HGNC:15494]	1	184387058	184629020	q25.3	1
ENSG00000115904	1926.85	-0.415	0.104	-3.975	7.0489e-05	0.001897	down	SOS1	SOS Ras/Rac guanine nucleotide exchange factor 1 [Source:HGNC Symbol;Acc:HGNC:11187]	2	38981396	39124345	p22.1	-1
ENSG00000260101	449.971	-0.63	0.159	-3.972	7.1125e-05	0.001906	down			2	64522187	64524093	p14	-1
ENSG00000137776	2815.29	-0.334	0.084	-3.972	7.1225e-05	0.001906	down	SLTM	SAFB like transcription modulator [Source:HGNC Symbol;Acc:HGNC:20709]	15	58879045	58933653	q22.1	-1
ENSG00000150093	15598.7	-0.294	0.074	-3.97	7.1788e-05	0.001916	down	ITGB1	integrin subunit beta 1 [Source:HGNC Symbol;Acc:HGNC:6153]	10	32900319	33005792	p11.22	-1
ENSG00000104267	6117.23	-0.414	0.104	-3.964	7.359e-05	0.001959	down	CA2	carbonic anhydrase 2 [Source:HGNC Symbol;Acc:HGNC:1373]	8	85463852	85481493	q21.2	1
ENSG00000151239	1943.15	-0.466	0.118	-3.96	7.4908e-05	0.001971	down	TWF1	twinfilin actin binding protein 1 [Source:HGNC Symbol;Acc:HGNC:9620]	12	43793723	43806375	q12	-1
ENSG00000122591	1356.98	-0.423	0.107	-3.961	7.4525e-05	0.001971	down	FAM126A	family with sequence similarity 126 member A [Source:HGNC Symbol;Acc:HGNC:24587]	7	22889371	23014130	p15.3	-1
ENSG00000168710	7600.52	-0.294	0.074	-3.959	7.5112e-05	0.001971	down	AHCYL1	adenosylhomocysteinase like 1 [Source:HGNC Symbol;Acc:HGNC:344]	1	109984686	110023741	p13.3	1
ENSG00000120756	389.742	-0.831	0.21	-3.958	7.5655e-05	0.001975	down	PLS1	plastin 1 [Source:HGNC Symbol;Acc:HGNC:9090]	3	142596387	142713664	q23	1
ENSG00000135972	376.853	-0.682	0.172	-3.956	7.6322e-05	0.00198	down	MRPS9	mitochondrial ribosomal protein S9 [Source:HGNC Symbol;Acc:HGNC:14501]	2	105037983	105099960	q12.1	1
ENSG00000058804	1420.95	-0.485	0.123	-3.956	7.6245e-05	0.00198	down	NDC1	NDC1 transmembrane nucleoporin [Source:HGNC Symbol;Acc:HGNC:25525]	1	53765460	53838860	p32.3	-1
ENSG00000115091	31106.4	-0.387	0.098	-3.953	7.7332e-05	0.002001	down	ACTR3	ARP3 actin related protein 3 homolog [Source:HGNC Symbol;Acc:HGNC:170]	2	113889960	113962596	q14.1	1
ENSG00000108651	2059.79	-0.316	0.08	-3.948	7.8878e-05	0.002036	down	UTP6	UTP6, small subunit processome component [Source:HGNC Symbol;Acc:HGNC:18279]	17	31860899	31901765	q11.2	-1
ENSG00000109689	705.714	-0.462	0.117	-3.945	7.9655e-05	0.002039	down	STIM2	stromal interaction molecule 2 [Source:HGNC Symbol;Acc:HGNC:19205]	4	26857678	27025381	p15.2	1
ENSG00000111885	5882.71	-0.452	0.115	-3.946	7.9389e-05	0.002039	down	MAN1A1	mannosidase alpha class 1A member 1 [Source:HGNC Symbol;Acc:HGNC:6821]	6	119177209	119349761	q22.31	-1
ENSG00000135655	6133.29	-0.423	0.107	-3.945	7.9811e-05	0.002039	down	USP15	ubiquitin specific peptidase 15 [Source:HGNC Symbol;Acc:HGNC:12613]	12	62260338	62417431	q14.1	1
ENSG00000187098	3645.64	-0.364	0.092	-3.945	7.9677e-05	0.002039	down	MITF	melanogenesis associated transcription factor [Source:HGNC Symbol;Acc:HGNC:7105]	3	69739435	69968337	p13	1
ENSG00000137628	3065.35	-0.438	0.111	-3.943	8.0511e-05	0.002052	down	DDX60	DExD/H-box helicase 60 [Source:HGNC Symbol;Acc:HGNC:25942]	4	168216293	168318807	q32.3	-1
ENSG00000014257	129.469	-0.998	0.253	-3.94	8.1597e-05	0.002072	down	ACPP	acid phosphatase, prostate [Source:HGNC Symbol;Acc:HGNC:125]	3	132317367	132368298	q22.1	1
ENSG00000169439	16497.9	-0.381	0.097	-3.939	8.1915e-05	0.002072	down	SDC2	syndecan 2 [Source:HGNC Symbol;Acc:HGNC:10659]	8	96493351	96611780	q22.1	1
ENSG00000143549	11930.9	-0.255	0.065	-3.939	8.1794e-05	0.002072	down	TPM3	tropomyosin 3 [Source:HGNC Symbol;Acc:HGNC:12012]	1	154155304	154194648	q21.3	-1
ENSG00000152760	142.142	-1.248	0.317	-3.937	8.2519e-05	0.002082	down	TCTEX1D1	Tctex1 domain containing 1 [Source:HGNC Symbol;Acc:HGNC:26882]	1	66752459	66778787	p31.3	1
ENSG00000064012	1310.65	-0.408	0.104	-3.926	8.6322e-05	0.002141	down	CASP8	caspase 8 [Source:HGNC Symbol;Acc:HGNC:1509]	2	201233443	201287711	q33.1	1
ENSG00000172716	3083.8	-0.296	0.075	-3.927	8.6153e-05	0.002141	down	SLFN11	schlafen family member 11 [Source:HGNC Symbol;Acc:HGNC:26633]	17	35350305	35373701	q12	-1
ENSG00000122068	3836.97	-0.395	0.101	-3.925	8.6608e-05	0.002143	down	FYTTD1	forty-two-three domain containing 1 [Source:HGNC Symbol;Acc:HGNC:25407]	3	197737179	197787596	q29	1
ENSG00000168386	710.882	-0.558	0.142	-3.921	8.819e-05	0.002156	down	FILIP1L	filamin A interacting protein 1 like [Source:HGNC Symbol;Acc:HGNC:24589]	3	99830141	100114513	q12.1	-1
ENSG00000152558	12550.3	-0.467	0.119	-3.921	8.8197e-05	0.002156	down	TMEM123	transmembrane protein 123 [Source:HGNC Symbol;Acc:HGNC:30138]	11	102396332	102470384	q22.2	-1
ENSG00000114030	1956.33	-0.388	0.099	-3.922	8.7696e-05	0.002156	down	KPNA1	karyopherin subunit alpha 1 [Source:HGNC Symbol;Acc:HGNC:6394]	3	122421949	122514945	q21.1	-1
ENSG00000168461	11501.4	-0.268	0.068	-3.922	8.7799e-05	0.002156	down	RAB31	RAB31, member RAS oncogene family [Source:HGNC Symbol;Acc:HGNC:9771]	18	9708165	9862551	p11.22	1
ENSG00000119669	356.348	-0.714	0.182	-3.916	8.9844e-05	0.002186	down	IRF2BPL	interferon regulatory factor 2 binding protein like [Source:HGNC Symbol;Acc:HGNC:14282]	14	77024543	77028699	q24.3	-1
ENSG00000088832	7563.62	-0.248	0.063	-3.917	8.9697e-05	0.002186	down	FKBP1A	FK506 binding protein 1A [Source:HGNC Symbol;Acc:HGNC:3711]	20	1368978	1393172	p13	-1
ENSG00000060749	1925.92	-0.463	0.118	-3.915	9.0301e-05	0.002187	down	QSER1	glutamine and serine rich 1 [Source:HGNC Symbol;Acc:HGNC:26154]	11	32893178	32993316	p13	1
ENSG00000055044	1557.29	-0.436	0.111	-3.915	9.0331e-05	0.002187	down	NOP58	NOP58 ribonucleoprotein [Source:HGNC Symbol;Acc:HGNC:29926]	2	202265716	202303666	q33.1	1
ENSG00000071205	1513.85	-0.346	0.089	-3.9	9.6205e-05	0.002318	down	ARHGAP10	Rho GTPase activating protein 10 [Source:HGNC Symbol;Acc:HGNC:26099]	4	147732063	148072780	q31.23	1
ENSG00000149100	2762.82	-0.327	0.084	-3.897	9.7219e-05	0.002337	down	EIF3M	eukaryotic translation initiation factor 3 subunit M [Source:HGNC Symbol;Acc:HGNC:24460]	11	32583798	32606262	p13	1
ENSG00000187210	584.279	-0.687	0.176	-3.895	9.8294e-05	0.002352	down	GCNT1	glucosaminyl (N-acetyl) transferase 1, core 2 [Source:HGNC Symbol;Acc:HGNC:4203]	9	76419850	76507416	q21.13	1
ENSG00000078674	7077.43	-0.335	0.086	-3.893	9.9153e-05	0.002361	down	PCM1	pericentriolar material 1 [Source:HGNC Symbol;Acc:HGNC:8727]	8	17922840	18029944	p22	1
ENSG00000184445	928.382	-0.514	0.132	-3.89	0.0001004	0.002385	down	KNTC1	kinetochore associated 1 [Source:HGNC Symbol;Acc:HGNC:17255]	12	122527246	122626396	q24.31	1
ENSG00000113460	473.745	-0.655	0.169	-3.886	0.00010179	0.002413	down	BRIX1	BRX1, biogenesis of ribosomes [Source:HGNC Symbol;Acc:HGNC:24170]	5	34915376	34925996	p13.2	1
ENSG00000157510	2044.57	-0.498	0.128	-3.883	0.00010303	0.002431	down	AFAP1L1	actin filament associated protein 1 like 1 [Source:HGNC Symbol;Acc:HGNC:26714]	5	149271871	149341802	q32	1
ENSG00000132475	6436.24	-0.364	0.094	-3.875	0.00010678	0.002513	down	H3F3B	H3 histone family member 3B [Source:HGNC Symbol;Acc:HGNC:4765]	17	75776434	75785893	q25.1	-1
ENSG00000154262	774.296	-0.655	0.169	-3.87	0.00010889	0.002551	down	ABCA6	ATP binding cassette subfamily A member 6 [Source:HGNC Symbol;Acc:HGNC:36]	17	69078702	69141888	q24.3	-1
ENSG00000189057	561.504	-0.991	0.256	-3.868	0.00010968	0.002563	down	FAM111B	family with sequence similarity 111 member B [Source:HGNC Symbol;Acc:HGNC:24200]	11	59107185	59127410	q12.1	1
ENSG00000144895	3342.32	-0.381	0.099	-3.865	0.00011089	0.002586	down	EIF2A	eukaryotic translation initiation factor 2A [Source:HGNC Symbol;Acc:HGNC:3254]	3	150546678	150584242	q25.1	1
ENSG00000088766	1100.21	-0.456	0.118	-3.854	0.00011643	0.002703	down	CRLS1	cardiolipin synthase 1 [Source:HGNC Symbol;Acc:HGNC:16148]	20	6006090	6040053	p12.3	1
ENSG00000133961	11411.9	-0.288	0.075	-3.843	0.00012136	0.002792	down	NUMB	NUMB, endocytic adaptor protein [Source:HGNC Symbol;Acc:HGNC:8060]	14	73275107	73458617	q24.3	-1
ENSG00000155158	7449.56	-0.325	0.085	-3.834	0.00012613	0.002895	down	TTC39B	tetratricopeptide repeat domain 39B [Source:HGNC Symbol;Acc:HGNC:23704]	9	15163622	15307360	p22.3	-1
ENSG00000171604	842.957	-0.538	0.14	-3.831	0.00012774	0.002916	down	CXXC5	CXXC finger protein 5 [Source:HGNC Symbol;Acc:HGNC:26943]	5	139647299	139683882	q31.2	1
ENSG00000151465	1258.57	-0.38	0.099	-3.83	0.00012793	0.002916	down	CDC123	cell division cycle 123 [Source:HGNC Symbol;Acc:HGNC:16827]	10	12195965	12250589	p14	1
ENSG00000108559	661.951	-0.5	0.131	-3.828	0.00012934	0.002934	down	NUP88	nucleoporin 88 [Source:HGNC Symbol;Acc:HGNC:8067]	17	5360963	5420160	p13.2	-1
ENSG00000163964	586.828	-0.49	0.128	-3.827	0.00012988	0.002934	down	PIGX	phosphatidylinositol glycan anchor biosynthesis class X [Source:HGNC Symbol;Acc:HGNC:26046]	3	196639775	196736007	q29	1
ENSG00000171109	2886.38	-0.377	0.098	-3.828	0.00012909	0.002934	down	MFN1	mitofusin 1 [Source:HGNC Symbol;Acc:HGNC:18262]	3	179347692	179394931	q26.33	1
ENSG00000138434	4292.48	-0.366	0.096	-3.827	0.00012971	0.002934	down	SSFA2	sperm specific antigen 2 [Source:HGNC Symbol;Acc:HGNC:11319]	2	181891833	181930738	q31.3	1
ENSG00000132669	1583.98	-0.358	0.093	-3.826	0.00013033	0.002938	down	RIN2	Ras and Rab interactor 2 [Source:HGNC Symbol;Acc:HGNC:18750]	20	19886521	20002457	p11.23	1
ENSG00000186298	5121.93	-0.339	0.089	-3.821	0.00013306	0.002986	down	PPP1CC	protein phosphatase 1 catalytic subunit gamma [Source:HGNC Symbol;Acc:HGNC:9283]	12	110719680	110742939	q24.11	-1
ENSG00000196083	606.285	-0.542	0.142	-3.819	0.00013417	0.002999	down	IL1RAP	interleukin 1 receptor accessory protein [Source:HGNC Symbol;Acc:HGNC:5995]	3	190514051	190659750	q28	1
ENSG00000111912	1672.66	-0.419	0.11	-3.819	0.00013423	0.002999	down	NCOA7	nuclear receptor coactivator 7 [Source:HGNC Symbol;Acc:HGNC:21081]	6	125781161	125932030	q22.31	1
ENSG00000228253	10319.6	-0.585	0.153	-3.815	0.00013614	0.003029	down	MT-ATP8	mitochondrially encoded ATP synthase membrane subunit 8 [Source:HGNC Symbol;Acc:HGNC:7415]	MT	8366	8572		1
ENSG00000039123	2643.13	-0.391	0.103	-3.811	0.00013814	0.00306	down	MTREX	Mtr4 exosome RNA helicase [Source:HGNC Symbol;Acc:HGNC:18734]	5	55307760	55425581	q11.2	1
ENSG00000184384	1560.1	-0.399	0.105	-3.809	0.00013929	0.003078	down	MAML2	mastermind like transcriptional coactivator 2 [Source:HGNC Symbol;Acc:HGNC:16259]	11	95976598	96343180	q21	-1
ENSG00000112697	11979.1	-0.431	0.113	-3.803	0.0001427	0.003126	down	TMEM30A	transmembrane protein 30A [Source:HGNC Symbol;Acc:HGNC:16667]	6	75252924	75284968	q14.1	-1
ENSG00000156110	1711.55	-0.369	0.097	-3.803	0.00014267	0.003126	down	ADK	adenosine kinase [Source:HGNC Symbol;Acc:HGNC:257]	10	74151185	74709303	q22.2	1
ENSG00000136492	243.931	-0.835	0.22	-3.8	0.00014461	0.003148	down	BRIP1	BRCA1 interacting protein C-terminal helicase 1 [Source:HGNC Symbol;Acc:HGNC:20473]	17	61681266	61863521	q23.2	-1
ENSG00000112773	1922.69	-0.509	0.134	-3.8	0.00014441	0.003148	down	FAM46A	family with sequence similarity 46 member A [Source:HGNC Symbol;Acc:HGNC:18345]	6	81491439	81752774	q14.1	-1
ENSG00000110852	1337.17	-0.437	0.115	-3.789	0.00015104	0.003274	down	CLEC2B	C-type lectin domain family 2 member B [Source:HGNC Symbol;Acc:HGNC:2053]	12	9852984	9870136	p13.31	-1
ENSG00000102158	4072.4	-0.365	0.096	-3.79	0.00015073	0.003274	down	MAGT1	magnesium transporter 1 [Source:HGNC Symbol;Acc:HGNC:28880]	X	77826364	77895593	q21.1	-1
ENSG00000065548	2739.53	-0.436	0.115	-3.787	0.00015252	0.003299	down	ZC3H15	zinc finger CCCH-type containing 15 [Source:HGNC Symbol;Acc:HGNC:29528]	2	186486156	186509363	q32.1	1
ENSG00000087589	263.844	-0.649	0.171	-3.786	0.00015326	0.003308	down	CASS4	Cas scaffolding protein family member 4 [Source:HGNC Symbol;Acc:HGNC:15878]	20	56412112	56460387	q13.31	1
ENSG00000184898	1130.8	-0.445	0.118	-3.779	0.00015749	0.003391	down	RBM43	RNA binding motif protein 43 [Source:HGNC Symbol;Acc:HGNC:24790]	2	151247940	151261879	q23.3	-1
ENSG00000138071	34791.5	-0.353	0.093	-3.778	0.00015779	0.003391	down	ACTR2	ARP2 actin related protein 2 homolog [Source:HGNC Symbol;Acc:HGNC:169]	2	65227753	65271253	p14	1
ENSG00000065183	762.602	-0.486	0.129	-3.776	0.00015939	0.003418	down	WDR3	WD repeat domain 3 [Source:HGNC Symbol;Acc:HGNC:12755]	1	117929720	117966542	p12	1
ENSG00000180370	7198.69	-0.288	0.076	-3.775	0.00015999	0.003424	down	PAK2	p21 (RAC1) activated kinase 2 [Source:HGNC Symbol;Acc:HGNC:8591]	3	196739857	196832647	q29	1
ENSG00000198554	532.946	-0.67	0.177	-3.773	0.00016145	0.003448	down	WDHD1	WD repeat and HMG-box DNA binding protein 1 [Source:HGNC Symbol;Acc:HGNC:23170]	14	54938950	55027105	q22.3	-1
ENSG00000172115	7040.34	-0.45	0.119	-3.769	0.00016363	0.003482	down	CYCS	cytochrome c, somatic [Source:HGNC Symbol;Acc:HGNC:19986]	7	25120091	25125361	p15.3	-1
ENSG00000109606	4766.89	-0.307	0.081	-3.769	0.00016373	0.003482	down	DHX15	DEAH-box helicase 15 [Source:HGNC Symbol;Acc:HGNC:2738]	4	24517441	24584550	p15.2	-1
ENSG00000115590	74.765	-1.345	0.357	-3.766	0.0001657	0.003509	down	IL1R2	interleukin 1 receptor type 2 [Source:HGNC Symbol;Acc:HGNC:5994]	2	101991844	102028544	q11.2	1
ENSG00000117500	8749.78	-0.52	0.138	-3.763	0.00016801	0.003551	down	TMED5	transmembrane p24 trafficking protein 5 [Source:HGNC Symbol;Acc:HGNC:24251]	1	93149742	93180728	p22.1	-1
ENSG00000038945	23319.6	-0.338	0.09	-3.759	0.0001705	0.003588	down	MSR1	macrophage scavenger receptor 1 [Source:HGNC Symbol;Acc:HGNC:7376]	8	16107878	16567490	p22	-1
ENSG00000155393	1695.83	-0.371	0.099	-3.758	0.00017156	0.003603	down	HEATR3	HEAT repeat containing 3 [Source:HGNC Symbol;Acc:HGNC:26087]	16	50065941	50106387	q12.1	1
ENSG00000147509	497.59	-0.601	0.16	-3.756	0.00017298	0.003625	down	RGS20	regulator of G protein signaling 20 [Source:HGNC Symbol;Acc:HGNC:14600]	8	53851808	53959303	q11.23	1
ENSG00000214114	407.125	-0.588	0.157	-3.746	0.00017942	0.003753	down	MYCBP	MYC binding protein [Source:HGNC Symbol;Acc:HGNC:7554]	1	38862964	38874105	p34.3	-1
ENSG00000198826	815.204	-0.566	0.151	-3.745	0.00018031	0.003758	down	ARHGAP11A	Rho GTPase activating protein 11A [Source:HGNC Symbol;Acc:HGNC:15783]	15	32615144	32639949	q13.3	1
ENSG00000164308	4263.05	-0.371	0.099	-3.745	0.00018043	0.003758	down	ERAP2	endoplasmic reticulum aminopeptidase 2 [Source:HGNC Symbol;Acc:HGNC:29499]	5	96875939	96919716	q15	1
ENSG00000138190	1639.86	-0.433	0.116	-3.741	0.00018355	0.003815	down	EXOC6	exocyst complex component 6 [Source:HGNC Symbol;Acc:HGNC:23196]	10	92834713	93059493	q23.33	1
ENSG00000140650	551.627	-0.488	0.13	-3.738	0.00018562	0.003851	down	PMM2	phosphomannomutase 2 [Source:HGNC Symbol;Acc:HGNC:9115]	16	8788823	8849331	p13.2	1
ENSG00000165490	961.586	-0.684	0.183	-3.729	0.00019233	0.003972	down	DDIAS	DNA damage induced apoptosis suppressor [Source:HGNC Symbol;Acc:HGNC:26351]	11	82899975	82958277	q14.1	1
ENSG00000221963	3496.99	-0.38	0.102	-3.729	0.00019189	0.003972	down	APOL6	apolipoprotein L6 [Source:HGNC Symbol;Acc:HGNC:14870]	22	35648395	35668409	q12.3	1
ENSG00000128245	2489.7	-0.325	0.087	-3.728	0.00019291	0.003972	down	YWHAH	tyrosine 3-monooxygenase/tryptophan 5-monooxygenase activation protein eta [Source:HGNC Symbol;Acc:HGNC:12853]	22	31944461	31957603	q12.3	1
ENSG00000175175	60.82	-1.534	0.412	-3.721	0.00019878	0.004074	down	PPM1E	protein phosphatase, Mg2+/Mn2+ dependent 1E [Source:HGNC Symbol;Acc:HGNC:19322]	17	58755869	58985176	q22	1
ENSG00000112893	3543.74	-0.445	0.12	-3.718	0.00020107	0.004112	down	MAN2A1	mannosidase alpha class 2A member 1 [Source:HGNC Symbol;Acc:HGNC:6824]	5	109689366	109869625	q21.3	1
ENSG00000136731	3897.4	-0.286	0.077	-3.707	0.0002097	0.004263	down	UGGT1	UDP-glucose glycoprotein glucosyltransferase 1 [Source:HGNC Symbol;Acc:HGNC:15663]	2	128091200	128195677	q14.3	1
ENSG00000170876	1581.37	-0.387	0.104	-3.704	0.00021199	0.004299	down	TMEM43	transmembrane protein 43 [Source:HGNC Symbol;Acc:HGNC:28472]	3	14124940	14143679	p25.1	1
ENSG00000111252	3483.45	-0.286	0.077	-3.704	0.00021234	0.004299	down	SH2B3	SH2B adaptor protein 3 [Source:HGNC Symbol;Acc:HGNC:29605]	12	111405948	111451623	q24.12	1
ENSG00000162614	148.649	-1.018	0.275	-3.7	0.0002153	0.004351	down	NEXN	nexilin F-actin binding protein [Source:HGNC Symbol;Acc:HGNC:29557]	1	77888513	77943895	p31.1	1
ENSG00000198695	40809.9	-0.251	0.068	-3.698	0.00021737	0.004384	down	MT-ND6	mitochondrially encoded NADH:ubiquinone oxidoreductase core subunit 6 [Source:HGNC Symbol;Acc:HGNC:7462]	MT	14149	14673		-1
ENSG00000128045	234.631	-0.856	0.232	-3.694	0.00022115	0.004433	down	RASL11B	RAS like family 11 member B [Source:HGNC Symbol;Acc:HGNC:23804]	4	52862290	52866835	q12	1
ENSG00000197170	2353.63	-0.504	0.137	-3.687	0.00022724	0.004547	down	PSMD12	proteasome 26S subunit, non-ATPase 12 [Source:HGNC Symbol;Acc:HGNC:9557]	17	67337916	67366627	q24.2	-1
ENSG00000171208	613.668	-0.527	0.143	-3.683	0.00023032	0.004575	down	NETO2	neuropilin and tolloid like 2 [Source:HGNC Symbol;Acc:HGNC:14644]	16	47077703	47143997	q12.1	-1
ENSG00000163938	1767.6	-0.365	0.099	-3.683	0.00023048	0.004575	down	GNL3	G protein nucleolar 3 [Source:HGNC Symbol;Acc:HGNC:29931]	3	52681156	52694492	p21.1	1
ENSG00000005175	1425.94	-0.521	0.142	-3.681	0.0002321	0.004587	down	RPAP3	RNA polymerase II associated protein 3 [Source:HGNC Symbol;Acc:HGNC:26151]	12	47661249	47706061	q13.11	-1
ENSG00000074695	4379.36	-0.4	0.109	-3.675	0.00023811	0.004663	down	LMAN1	lectin, mannose binding 1 [Source:HGNC Symbol;Acc:HGNC:6631]	18	59327823	59359962	q21.32	-1
ENSG00000107798	223741	-0.301	0.082	-3.669	0.00024329	0.004729	down	LIPA	lipase A, lysosomal acid type [Source:HGNC Symbol;Acc:HGNC:6617]	10	89213569	89414557	q23.31	-1
ENSG00000104756	2174.74	-0.398	0.109	-3.666	0.00024625	0.004776	down	KCTD9	potassium channel tetramerization domain containing 9 [Source:HGNC Symbol;Acc:HGNC:22401]	8	25427847	25458476	p21.2	-1
ENSG00000101868	421.892	-0.593	0.162	-3.665	0.00024726	0.004787	down	POLA1	DNA polymerase alpha 1, catalytic subunit [Source:HGNC Symbol;Acc:HGNC:9173]	X	24693919	24996986	p22.11	1
ENSG00000135218	11212.8	-0.427	0.117	-3.663	0.00024916	0.004805	down	CD36	CD36 molecule [Source:HGNC Symbol;Acc:HGNC:1663]	7	80369575	80679277	q21.11	1
ENSG00000164120	3785.32	-0.583	0.159	-3.662	0.00024986	0.00481	down	HPGD	15-hydroxyprostaglandin dehydrogenase [Source:HGNC Symbol;Acc:HGNC:5154]	4	174490177	174523154	q34.1	-1
ENSG00000134001	3202.27	-0.375	0.103	-3.659	0.00025365	0.004873	down	EIF2S1	eukaryotic translation initiation factor 2 subunit alpha [Source:HGNC Symbol;Acc:HGNC:3265]	14	67359997	67386516	q23.3	1
ENSG00000124783	6059	-0.418	0.114	-3.654	0.0002578	0.004944	down	SSR1	signal sequence receptor subunit 1 [Source:HGNC Symbol;Acc:HGNC:11323]	6	7268306	7347446	p24.3	-1
ENSG00000004455	1374.79	-0.325	0.089	-3.653	0.00025911	0.004959	down	AK2	adenylate kinase 2 [Source:HGNC Symbol;Acc:HGNC:362]	1	33007940	33080996	p35.1	-1
ENSG00000152749	875.769	-0.536	0.147	-3.653	0.00025966	0.00496	down	GPR180	G protein-coupled receptor 180 [Source:HGNC Symbol;Acc:HGNC:28899]	13	94601903	94634645	q32.1	1
ENSG00000137492	1787.34	-0.391	0.107	-3.646	0.00026611	0.005048	down	THAP12	THAP domain containing 12 [Source:HGNC Symbol;Acc:HGNC:9440]	11	76349956	76380971	q13.5	-1
ENSG00000142864	5787.56	-0.373	0.102	-3.646	0.00026623	0.005048	down	SERBP1	SERPINE1 mRNA binding protein 1 [Source:HGNC Symbol;Acc:HGNC:17860]	1	67407810	67430415	p31.3	-1
ENSG00000069275	5468.88	-0.322	0.088	-3.647	0.00026566	0.005048	down	NUCKS1	nuclear casein kinase and cyclin dependent kinase substrate 1 [Source:HGNC Symbol;Acc:HGNC:29923]	1	205712819	205750276	q32.1	-1
ENSG00000115355	16617	-0.449	0.123	-3.645	0.00026766	0.005066	down	CCDC88A	coiled-coil domain containing 88A [Source:HGNC Symbol;Acc:HGNC:25523]	2	55287842	55419895	p16.1	-1
ENSG00000171657	268.082	-0.808	0.222	-3.64	0.00027222	0.005128	down	GPR82	G protein-coupled receptor 82 [Source:HGNC Symbol;Acc:HGNC:4533]	X	41724155	41730135	p11.4	1
ENSG00000164307	5483.48	-0.298	0.082	-3.635	0.00027805	0.005214	down	ERAP1	endoplasmic reticulum aminopeptidase 1 [Source:HGNC Symbol;Acc:HGNC:18173]	5	96760810	96808100	q15	-1
ENSG00000113649	1427.23	-0.41	0.113	-3.632	0.00028085	0.005247	down	TCERG1	transcription elongation regulator 1 [Source:HGNC Symbol;Acc:HGNC:15630]	5	146447311	146511961	q32	1
ENSG00000178741	2281.52	-0.322	0.089	-3.632	0.00028139	0.005247	down	COX5A	cytochrome c oxidase subunit 5A [Source:HGNC Symbol;Acc:HGNC:2267]	15	74919791	74938168	q24.2	-1
ENSG00000161929	686.082	-0.455	0.125	-3.629	0.00028502	0.005305	down	SCIMP	SLP adaptor and CSK interacting membrane protein [Source:HGNC Symbol;Acc:HGNC:33504]	17	5208961	5234860	p13.2	-1
ENSG00000166881	1151.65	-0.364	0.1	-3.625	0.0002885	0.00536	down	NEMP1	nuclear envelope integral membrane protein 1 [Source:HGNC Symbol;Acc:HGNC:29001]	12	57055643	57088063	q13.3	-1
ENSG00000055332	4760.84	-0.379	0.105	-3.62	0.0002943	0.005458	down	EIF2AK2	eukaryotic translation initiation factor 2 alpha kinase 2 [Source:HGNC Symbol;Acc:HGNC:9437]	2	37099210	37157065	p22.2	-1
ENSG00000134215	878.9	-0.474	0.131	-3.619	0.00029592	0.005468	down	VAV3	vav guanine nucleotide exchange factor 3 [Source:HGNC Symbol;Acc:HGNC:12659]	1	107571160	107965144	p13.3	-1
ENSG00000139618	784.975	-0.581	0.161	-3.616	0.00029876	0.005506	down	BRCA2	BRCA2, DNA repair associated [Source:HGNC Symbol;Acc:HGNC:1101]	13	32315474	32400266	q13.1	1
ENSG00000008083	951.444	-0.391	0.108	-3.615	0.00029988	0.005511	down	JARID2	jumonji and AT-rich interaction domain containing 2 [Source:HGNC Symbol;Acc:HGNC:6196]	6	15246296	15522040	p22.3	1
ENSG00000150768	1817.87	-0.401	0.111	-3.614	0.00030178	0.005527	down	DLAT	dihydrolipoamide S-acetyltransferase [Source:HGNC Symbol;Acc:HGNC:2896]	11	112024814	112064390	q23.1	1
ENSG00000166747	5709.43	-0.286	0.079	-3.614	0.00030184	0.005527	down	AP1G1	adaptor related protein complex 1 gamma 1 subunit [Source:HGNC Symbol;Acc:HGNC:555]	16	71729000	71809201	q22.2	-1
ENSG00000131747	2569.79	-0.623	0.173	-3.612	0.00030341	0.005536	down	TOP2A	DNA topoisomerase II alpha [Source:HGNC Symbol;Acc:HGNC:11989]	17	40388516	40417950	q21.2	-1
ENSG00000154174	2915.66	-0.407	0.113	-3.612	0.00030342	0.005536	down	TOMM70	translocase of outer mitochondrial membrane 70 [Source:HGNC Symbol;Acc:HGNC:11985]	3	100363431	100401398	q12.2	-1
ENSG00000071189	2565.09	-0.388	0.107	-3.61	0.00030605	0.005574	down	SNX13	sorting nexin 13 [Source:HGNC Symbol;Acc:HGNC:21335]	7	17790761	17940501	p21.1	-1
ENSG00000145685	13670.7	-0.251	0.07	-3.605	0.00031192	0.00566	down	LHFPL2	LHFPL tetraspan subfamily member 2 [Source:HGNC Symbol;Acc:HGNC:6588]	5	78485215	78770021	q14.1	-1
ENSG00000152061	1701.34	-0.436	0.121	-3.604	0.00031354	0.005679	down	RABGAP1L	RAB GTPase activating protein 1 like [Source:HGNC Symbol;Acc:HGNC:24663]	1	174159410	174995308	q25.1	1
ENSG00000180957	1966.26	-0.328	0.091	-3.602	0.00031552	0.005695	down	PITPNB	phosphatidylinositol transfer protein beta [Source:HGNC Symbol;Acc:HGNC:9002]	22	27851669	27920134	q12.1	-1
ENSG00000152778	1312.59	-0.478	0.133	-3.602	0.00031628	0.005699	down	IFIT5	interferon induced protein with tetratricopeptide repeats 5 [Source:HGNC Symbol;Acc:HGNC:13328]	10	89414586	89421001	q23.31	1
ENSG00000134531	12696.4	-0.295	0.082	-3.601	0.00031724	0.005706	down	EMP1	epithelial membrane protein 1 [Source:HGNC Symbol;Acc:HGNC:3333]	12	13196716	13219939	p13.1	1
ENSG00000174780	4863.98	-0.348	0.097	-3.597	0.00032171	0.005776	down	SRP72	signal recognition particle 72 [Source:HGNC Symbol;Acc:HGNC:11303]	4	56467336	56503681	q12	1
ENSG00000075415	10388.2	-0.244	0.068	-3.595	0.00032445	0.005815	down	SLC25A3	solute carrier family 25 member 3 [Source:HGNC Symbol;Acc:HGNC:10989]	12	98593591	98606379	q23.1	1
ENSG00000138768	7292.17	-0.386	0.107	-3.589	0.00033162	0.005933	down	USO1	USO1 vesicle transport factor [Source:HGNC Symbol;Acc:HGNC:30904]	4	75724593	75814286	q21.1	1
ENSG00000113810	1781.96	-0.568	0.158	-3.587	0.00033393	0.005943	down	SMC4	structural maintenance of chromosomes 4 [Source:HGNC Symbol;Acc:HGNC:14013]	3	160399274	160434962	q25.33	1
ENSG00000058091	1954.45	-0.38	0.106	-3.587	0.00033387	0.005943	down	CDK14	cyclin dependent kinase 14 [Source:HGNC Symbol;Acc:HGNC:8883]	7	90466424	91210590	q21.13	1
ENSG00000116560	4877.05	-0.314	0.087	-3.586	0.00033643	0.005977	down	SFPQ	splicing factor proline and glutamine rich [Source:HGNC Symbol;Acc:HGNC:10774]	1	35176378	35193148	p34.3	-1
ENSG00000197780	1650.11	-0.51	0.142	-3.582	0.0003405	0.006028	down	TAF13	TATA-box binding protein associated factor 13 [Source:HGNC Symbol;Acc:HGNC:11546]	1	109062486	109076002	p13.3	-1
ENSG00000282826	897.604	-0.395	0.11	-3.583	0.00034009	0.006028	down	FRG1CP	FSHD region gene 1 family member C, pseudogene [Source:HGNC Symbol;Acc:HGNC:51762]	20	28580709	28602664	q11.1	-1
ENSG00000115419	11599.1	-0.477	0.133	-3.58	0.00034419	0.006062	down	GLS	glutaminase [Source:HGNC Symbol;Acc:HGNC:4331]	2	190880827	190965552	q32.2	1
ENSG00000203797	578.047	-0.46	0.129	-3.58	0.00034383	0.006062	down	DDO	D-aspartate oxidase [Source:HGNC Symbol;Acc:HGNC:2727]	6	110391771	110415562	q21	-1
ENSG00000067704	6287.58	-0.285	0.08	-3.576	0.00034954	0.006145	down	IARS2	isoleucyl-tRNA synthetase 2, mitochondrial [Source:HGNC Symbol;Acc:HGNC:29685]	1	220094102	220148041	q41	1
ENSG00000170027	9485.58	-0.286	0.08	-3.574	0.00035121	0.006164	down	YWHAG	tyrosine 3-monooxygenase/tryptophan 5-monooxygenase activation protein gamma [Source:HGNC Symbol;Acc:HGNC:12852]	7	76326794	76359031	q11.23	-1
ENSG00000091409	6921.68	-0.314	0.088	-3.573	0.00035255	0.006177	down	ITGA6	integrin subunit alpha 6 [Source:HGNC Symbol;Acc:HGNC:6142]	2	172427354	172506282	q31.1	1
ENSG00000110075	2718.86	-0.307	0.086	-3.567	0.00036062	0.006301	down	PPP6R3	protein phosphatase 6 regulatory subunit 3 [Source:HGNC Symbol;Acc:HGNC:1173]	11	68460731	68615334	q13.2	1
ENSG00000164024	1543.55	-0.36	0.101	-3.566	0.00036265	0.00631	down	METAP1	methionyl aminopeptidase 1 [Source:HGNC Symbol;Acc:HGNC:15789]	4	98995620	99062813	q23	1
ENSG00000080200	2134.65	-0.396	0.111	-3.562	0.00036811	0.006383	down	CRYBG3	crystallin beta-gamma domain containing 3 [Source:HGNC Symbol;Acc:HGNC:34427]	3	97822040	97944963	q11.2	1
ENSG00000105887	12568.6	-0.395	0.111	-3.562	0.00036774	0.006383	down	MTPN	myotrophin [Source:HGNC Symbol;Acc:HGNC:15667]	7	135926761	135977353	q33	-1
ENSG00000159082	1356.33	-0.421	0.118	-3.56	0.0003703	0.00641	down	SYNJ1	synaptojanin 1 [Source:HGNC Symbol;Acc:HGNC:11503]	21	32628759	32728048	q22.11	-1
ENSG00000112297	8193.47	-0.301	0.085	-3.559	0.00037215	0.006431	down	CRYBG1	crystallin beta-gamma domain containing 1 [Source:HGNC Symbol;Acc:HGNC:356]	6	106360808	106571978	q21	1
ENSG00000061794	1910.76	-0.369	0.104	-3.557	0.00037483	0.006455	down	MRPS35	mitochondrial ribosomal protein S35 [Source:HGNC Symbol;Acc:HGNC:16635]	12	27710773	27756295	p11.22	1
ENSG00000127947	8511.98	-0.375	0.105	-3.556	0.00037674	0.006466	down	PTPN12	protein tyrosine phosphatase, non-receptor type 12 [Source:HGNC Symbol;Acc:HGNC:9645]	7	77537275	77640071	q11.23	1
ENSG00000114686	1668.46	-0.363	0.102	-3.556	0.00037633	0.006466	down	MRPL3	mitochondrial ribosomal protein L3 [Source:HGNC Symbol;Acc:HGNC:10379]	3	131462212	131502983	q22.1	-1
ENSG00000156802	1319.38	-0.481	0.135	-3.555	0.00037805	0.006478	down	ATAD2	ATPase family, AAA domain containing 2 [Source:HGNC Symbol;Acc:HGNC:30123]	8	123319850	123416350	q24.13	-1
ENSG00000196305	10615.6	-0.327	0.092	-3.548	0.0003876	0.006608	down	IARS	isoleucyl-tRNA synthetase [Source:HGNC Symbol;Acc:HGNC:5330]	9	92210207	92293756	q22.31	-1
ENSG00000005700	5373.18	-0.425	0.12	-3.545	0.00039324	0.006693	down	IBTK	inhibitor of Bruton tyrosine kinase [Source:HGNC Symbol;Acc:HGNC:17853]	6	82169983	82247754	q14.1	-1
ENSG00000163840	4134.04	-0.296	0.084	-3.538	0.00040292	0.006835	down	DTX3L	deltex E3 ubiquitin ligase 3L [Source:HGNC Symbol;Acc:HGNC:30323]	3	122564238	122575203	q21.1	1
ENSG00000136522	1114.8	-0.363	0.103	-3.538	0.00040369	0.006836	down	MRPL47	mitochondrial ribosomal protein L47 [Source:HGNC Symbol;Acc:HGNC:16652]	3	179588285	179604654	q26.33	-1
ENSG00000187555	3519.11	-0.255	0.072	-3.533	0.00041098	0.006925	down	USP7	ubiquitin specific peptidase 7 [Source:HGNC Symbol;Acc:HGNC:12630]	16	8892094	8964514	p13.2	-1
ENSG00000121486	1498.55	-0.443	0.126	-3.532	0.00041192	0.00693	down	TRMT1L	tRNA methyltransferase 1 like [Source:HGNC Symbol;Acc:HGNC:16782]	1	185118098	185157072	q25.3	-1
ENSG00000051382	3413.01	-0.348	0.098	-3.532	0.00041307	0.006937	down	PIK3CB	phosphatidylinositol-4,5-bisphosphate 3-kinase catalytic subunit beta [Source:HGNC Symbol;Acc:HGNC:8976]	3	138652699	138834938	q22.3	-1
ENSG00000174125	2481.91	-0.4	0.113	-3.529	0.00041787	0.006995	down	TLR1	toll like receptor 1 [Source:HGNC Symbol;Acc:HGNC:11847]	4	38790677	38856817	p14	-1
ENSG00000164163	3986.3	-0.482	0.137	-3.525	0.00042277	0.007054	down	ABCE1	ATP binding cassette subfamily E member 1 [Source:HGNC Symbol;Acc:HGNC:69]	4	145097932	145129179	q31.21	1
ENSG00000080345	2306.33	-0.467	0.133	-3.526	0.00042227	0.007054	down	RIF1	replication timing regulatory factor 1 [Source:HGNC Symbol;Acc:HGNC:23207]	2	151409883	151508013	q23.3	1
ENSG00000116120	878.905	-0.459	0.13	-3.523	0.00042657	0.007094	down	FARSB	phenylalanyl-tRNA synthetase beta subunit [Source:HGNC Symbol;Acc:HGNC:17800]	2	222570536	222656337	q36.1	-1
ENSG00000188725	2719.82	-0.428	0.122	-3.52	0.00043146	0.007163	down	SMIM15	small integral membrane protein 15 [Source:HGNC Symbol;Acc:HGNC:33861]	5	61157709	61162474	q12.1	-1
ENSG00000118292	912.101	-0.348	0.099	-3.515	0.00043993	0.007258	down	C1orf54	chromosome 1 open reading frame 54 [Source:HGNC Symbol;Acc:HGNC:26258]	1	150268200	150280916	q21.2	1
ENSG00000083312	12402.8	-0.36	0.103	-3.51	0.00044857	0.007387	down	TNPO1	transportin 1 [Source:HGNC Symbol;Acc:HGNC:6401]	5	72816312	72916733	q13.2	1
ENSG00000174032	1695.98	-0.351	0.1	-3.508	0.00045184	0.007429	down	SLC25A30	solute carrier family 25 member 30 [Source:HGNC Symbol;Acc:HGNC:27371]	13	45393316	45418455	q14.13	-1
ENSG00000174173	896.366	-0.476	0.136	-3.506	0.00045559	0.007478	down	TRMT10C	tRNA methyltransferase 10C, mitochondrial RNase P subunit [Source:HGNC Symbol;Acc:HGNC:26022]	3	101561862	101566446	q12.3	1
ENSG00000198843	4830.73	-0.348	0.099	-3.505	0.00045638	0.007479	down	SELENOT	selenoprotein T [Source:HGNC Symbol;Acc:HGNC:18136]	3	150602875	150630445	q25.1	1
ENSG00000169155	1345.12	-0.334	0.095	-3.501	0.00046309	0.007552	down	ZBTB43	zinc finger and BTB domain containing 43 [Source:HGNC Symbol;Acc:HGNC:17908]	9	126805006	126838210	q33.3	1
ENSG00000113387	2947.16	-0.376	0.108	-3.497	0.00046993	0.007636	down	SUB1	SUB1 homolog, transcriptional regulator [Source:HGNC Symbol;Acc:HGNC:19985]	5	32531633	32604079	p13.3	1
ENSG00000153310	6204.54	-0.326	0.093	-3.496	0.00047223	0.007652	down	FAM49B	family with sequence similarity 49 member B [Source:HGNC Symbol;Acc:HGNC:25216]	8	129839593	130017129	q24.21	-1
ENSG00000081307	995.384	-0.447	0.128	-3.495	0.00047446	0.007676	down	UBA5	ubiquitin like modifier activating enzyme 5 [Source:HGNC Symbol;Acc:HGNC:23230]	3	132654446	132678097	q22.1	1
ENSG00000066777	3742.9	-0.333	0.095	-3.493	0.00047826	0.007725	down	ARFGEF1	ADP ribosylation factor guanine nucleotide exchange factor 1 [Source:HGNC Symbol;Acc:HGNC:15772]	8	67173511	67343677	q13.2	-1
ENSG00000062194	2301.86	-0.391	0.112	-3.484	0.00049386	0.007927	down	GPBP1	GC-rich promoter binding protein 1 [Source:HGNC Symbol;Acc:HGNC:29520]	5	57173948	57264679	q11.2	1
ENSG00000039560	2196.5	-0.381	0.109	-3.481	0.00049883	0.007981	down	RAI14	retinoic acid induced 14 [Source:HGNC Symbol;Acc:HGNC:14873]	5	34656237	34832627	p13.2	1
ENSG00000127334	2701.98	-0.426	0.122	-3.48	0.00050228	0.008011	down	DYRK2	dual specificity tyrosine phosphorylation regulated kinase 2 [Source:HGNC Symbol;Acc:HGNC:3093]	12	67648338	67665406	q15	1
ENSG00000147649	6960.32	-0.382	0.11	-3.48	0.00050222	0.008011	down	MTDH	metadherin [Source:HGNC Symbol;Acc:HGNC:29608]	8	97644179	97728770	q22.1	1
ENSG00000090520	2208.83	-0.318	0.091	-3.478	0.00050529	0.008045	down	DNAJB11	DnaJ heat shock protein family (Hsp40) member B11 [Source:HGNC Symbol;Acc:HGNC:14889]	3	186567403	186585800	q27.3	1
ENSG00000030419	239.08	-0.711	0.205	-3.477	0.00050793	0.008063	down	IKZF2	IKAROS family zinc finger 2 [Source:HGNC Symbol;Acc:HGNC:13177]	2	212999691	213152427	q34	-1
ENSG00000154582	3668.22	-0.367	0.106	-3.471	0.00051765	0.008167	down	ELOC	elongin C [Source:HGNC Symbol;Acc:HGNC:11617]	8	73939169	73972287	q21.11	-1
ENSG00000152601	8617.63	-0.361	0.104	-3.472	0.00051717	0.008167	down	MBNL1	muscleblind like splicing regulator 1 [Source:HGNC Symbol;Acc:HGNC:6923]	3	152243828	152465780	q25.1	1
ENSG00000158417	4546.84	-0.372	0.107	-3.467	0.0005257	0.008281	down	EIF5B	eukaryotic translation initiation factor 5B [Source:HGNC Symbol;Acc:HGNC:30793]	2	99337353	99401326	q11.2	1
ENSG00000138166	1205.07	-0.459	0.132	-3.467	0.00052694	0.008287	down	DUSP5	dual specificity phosphatase 5 [Source:HGNC Symbol;Acc:HGNC:3071]	10	110497838	110511544	q25.2	1
ENSG00000079785	2770.72	-0.332	0.096	-3.464	0.00053229	0.008358	down	DDX1	DEAD-box helicase 1 [Source:HGNC Symbol;Acc:HGNC:2734]	2	15591178	15631111	p24.3	1
ENSG00000179841	212.501	-0.864	0.25	-3.462	0.00053712	0.008421	down	AKAP5	A-kinase anchoring protein 5 [Source:HGNC Symbol;Acc:HGNC:375]	14	64465499	64474503	q23.3	1
ENSG00000136824	1560.32	-0.426	0.123	-3.46	0.00054026	0.008457	down	SMC2	structural maintenance of chromosomes 2 [Source:HGNC Symbol;Acc:HGNC:14011]	9	104094260	104141417	q31.1	1
ENSG00000065135	4354.81	-0.314	0.091	-3.458	0.00054512	0.0085	down	GNAI3	G protein subunit alpha i3 [Source:HGNC Symbol;Acc:HGNC:4387]	1	109548611	109618321	p13.3	1
ENSG00000110367	6735.05	-0.314	0.091	-3.453	0.00055525	0.008639	down	DDX6	DEAD-box helicase 6 [Source:HGNC Symbol;Acc:HGNC:2747]	11	118747766	118791149	q23.3	-1
ENSG00000178573	2371.86	-0.459	0.133	-3.447	0.00056704	0.008751	down	MAF	MAF bZIP transcription factor [Source:HGNC Symbol;Acc:HGNC:6776]	16	79585843	79600714	q23.2	-1
ENSG00000108091	2380.93	-0.341	0.099	-3.448	0.00056463	0.008751	down	CCDC6	coiled-coil domain containing 6 [Source:HGNC Symbol;Acc:HGNC:18782]	10	59788763	59906656	q21.2	-1
ENSG00000012963	1827.86	-0.313	0.091	-3.447	0.00056766	0.008751	down	UBR7	ubiquitin protein ligase E3 component n-recognin 7 (putative) [Source:HGNC Symbol;Acc:HGNC:20344]	14	93207056	93229215	q32.12	1
ENSG00000132300	1973.85	-0.302	0.087	-3.447	0.00056596	0.008751	down	PTCD3	pentatricopeptide repeat domain 3 [Source:HGNC Symbol;Acc:HGNC:24717]	2	86106182	86142157	p11.2	1
ENSG00000162735	1877.37	-0.281	0.082	-3.448	0.00056539	0.008751	down	PEX19	peroxisomal biogenesis factor 19 [Source:HGNC Symbol;Acc:HGNC:9713]	1	160276812	160286348	q23.2	-1
ENSG00000138032	1901.15	-0.332	0.096	-3.443	0.00057499	0.008824	down	PPM1B	protein phosphatase, Mg2+/Mn2+ dependent 1B [Source:HGNC Symbol;Acc:HGNC:9276]	2	44167969	44244384	p21	1
ENSG00000169436	355.944	-0.671	0.195	-3.441	0.0005798	0.008844	down	COL22A1	collagen type XXII alpha 1 chain [Source:HGNC Symbol;Acc:HGNC:22989]	8	138588235	138914006	q24.3	-1
ENSG00000119285	912.531	-0.354	0.103	-3.439	0.00058476	0.008907	down	HEATR1	HEAT repeat containing 1 [Source:HGNC Symbol;Acc:HGNC:25517]	1	236549005	236604504	q43	-1
ENSG00000118680	8455	-0.226	0.066	-3.438	0.00058664	0.008922	down	MYL12B	myosin light chain 12B [Source:HGNC Symbol;Acc:HGNC:29827]	18	3261909	3278284	p11.31	1
ENSG00000112419	2339.74	-0.436	0.127	-3.437	0.00058793	0.008928	down	PHACTR2	phosphatase and actin regulator 2 [Source:HGNC Symbol;Acc:HGNC:20956]	6	143536845	143831185	q24.2	1
ENSG00000137692	565.481	-0.493	0.144	-3.431	0.00060137	0.009091	down	DCUN1D5	defective in cullin neddylation 1 domain containing 5 [Source:HGNC Symbol;Acc:HGNC:28409]	11	103062076	103092215	q22.3	-1
ENSG00000099219	3594.06	-0.308	0.09	-3.43	0.0006044	0.009124	down	ERMP1	endoplasmic reticulum metallopeptidase 1 [Source:HGNC Symbol;Acc:HGNC:23703]	9	5765076	5833117	p24.1	-1
ENSG00000137996	1989.44	-0.361	0.105	-3.426	0.00061166	0.009219	down	RTCA	RNA 3'-terminal phosphate cyclase [Source:HGNC Symbol;Acc:HGNC:17981]	1	100266207	100292769	p21.2	1
ENSG00000023734	2877.06	-0.384	0.112	-3.421	0.00062503	0.009365	down	STRAP	serine/threonine kinase receptor associated protein [Source:HGNC Symbol;Acc:HGNC:30796]	12	15882391	15903478	p12.3	1
ENSG00000135249	565.313	-0.485	0.142	-3.42	0.00062632	0.009371	down	RINT1	RAD50 interactor 1 [Source:HGNC Symbol;Acc:HGNC:21876]	7	105532085	105567677	q22.3	1
ENSG00000100519	2706.5	-0.293	0.086	-3.415	0.00063713	0.009518	down	PSMC6	proteasome 26S subunit, ATPase 6 [Source:HGNC Symbol;Acc:HGNC:9553]	14	52707172	52728587	q22.1	1
ENSG00000177889	1831.01	-0.345	0.101	-3.415	0.00063877	0.009524	down	UBE2N	ubiquitin conjugating enzyme E2 N [Source:HGNC Symbol;Acc:HGNC:12492]	12	93405673	93442262	q22	-1
ENSG00000100883	3302.51	-0.325	0.095	-3.414	0.0006394	0.009524	down	SRP54	signal recognition particle 54 [Source:HGNC Symbol;Acc:HGNC:11301]	14	34981957	35029567	q13.2	1
ENSG00000143067	1508.16	-0.419	0.123	-3.41	0.00065058	0.009648	down	ZNF697	zinc finger protein 697 [Source:HGNC Symbol;Acc:HGNC:32034]	1	119619422	119647773	p12	-1
ENSG00000150681	609.131	-0.694	0.204	-3.407	0.00065764	0.009739	down	RGS18	regulator of G protein signaling 18 [Source:HGNC Symbol;Acc:HGNC:14261]	1	192158457	192185815	q31.2	1
ENSG00000118246	1512.08	-0.418	0.123	-3.405	0.00066105	0.009747	down	FASTKD2	FAST kinase domains 2 [Source:HGNC Symbol;Acc:HGNC:29160]	2	206765357	206792509	q33.3	1
ENSG00000143669	4330.53	-0.381	0.112	-3.406	0.00065955	0.009747	down	LYST	lysosomal trafficking regulator [Source:HGNC Symbol;Acc:HGNC:1968]	1	235661041	235883640	q42.3	-1
ENSG00000088986	3189.17	-0.27	0.079	-3.405	0.00066108	0.009747	down	DYNLL1	dynein light chain LC8-type 1 [Source:HGNC Symbol;Acc:HGNC:15476]	12	120469850	120498493	q24.31	1
ENSG00000137145	8550.26	-0.33	0.097	-3.403	0.0006661	0.009807	down	DENND4C	DENN domain containing 4C [Source:HGNC Symbol;Acc:HGNC:26079]	9	19230435	19373545	p22.1	1
ENSG00000100664	12612.8	-0.266	0.078	-3.4	0.00067447	0.009901	down	EIF5	eukaryotic translation initiation factor 5 [Source:HGNC Symbol;Acc:HGNC:3299]	14	103333544	103345025	q32.32	1
ENSG00000023318	3211.61	-0.331	0.097	-3.398	0.00067911	0.009941	down	ERP44	endoplasmic reticulum protein 44 [Source:HGNC Symbol;Acc:HGNC:18311]	9	99979179	100099040	q31.1	-1
ENSG00000106638	499.324	-0.476	0.14	-3.393	0.00069245	0.01008	down	TBL2	transducin beta like 2 [Source:HGNC Symbol;Acc:HGNC:11586]	7	73568932	73578791	q11.23	-1
ENSG00000100567	2543.64	-0.272	0.08	-3.391	0.00069597	0.0101	down	PSMA3	proteasome subunit alpha 3 [Source:HGNC Symbol;Acc:HGNC:9532]	14	58244831	58272012	q23.1	1
ENSG00000151233	1009.51	-0.431	0.127	-3.39	0.00069916	0.01011	down	GXYLT1	glucoside xylosyltransferase 1 [Source:HGNC Symbol;Acc:HGNC:27482]	12	42081845	42144879	q12	-1
ENSG00000133706	3232.48	-0.322	0.095	-3.39	0.00069955	0.01011	down	LARS	leucyl-tRNA synthetase [Source:HGNC Symbol;Acc:HGNC:6512]	5	146113038	146182660	q32	-1
ENSG00000005020	5394.79	-0.37	0.109	-3.388	0.00070471	0.01017	down	SKAP2	src kinase associated phosphoprotein 2 [Source:HGNC Symbol;Acc:HGNC:15687]	7	26667062	26995239	p15.2	-1
ENSG00000140157	2125.28	-0.336	0.099	-3.385	0.00071122	0.01024	down	NIPA2	non imprinted in Prader-Willi/Angelman syndrome 2 [Source:HGNC Symbol;Acc:HGNC:17044]	15	22838641	22868384	q11.2	1
ENSG00000136997	191.337	-0.783	0.232	-3.384	0.00071464	0.01027	down	MYC	MYC proto-oncogene, bHLH transcription factor [Source:HGNC Symbol;Acc:HGNC:7553]	8	127735434	127741434	q24.21	1
ENSG00000065613	3615.36	-0.311	0.092	-3.381	0.00072154	0.01034	down	SLK	STE20 like kinase [Source:HGNC Symbol;Acc:HGNC:11088]	10	103967201	104029233	q24.33	1
ENSG00000173166	244.167	-0.634	0.188	-3.38	0.00072508	0.01037	down	RAPH1	Ras association (RalGDS/AF-6) and pleckstrin homology domains 1 [Source:HGNC Symbol;Acc:HGNC:14436]	2	203394345	203535410	q33.2	-1
ENSG00000113575	3268.08	-0.276	0.082	-3.378	0.00073034	0.01042	down	PPP2CA	protein phosphatase 2 catalytic subunit alpha [Source:HGNC Symbol;Acc:HGNC:9299]	5	134194334	134226142	q31.1	-1
ENSG00000119844	2225.94	-0.437	0.129	-3.377	0.000734	0.01043	down	AFTPH	aftiphilin [Source:HGNC Symbol;Acc:HGNC:25951]	2	64524305	64593005	p14	1
ENSG00000153201	8556.64	-0.334	0.099	-3.367	0.00076116	0.01076	down	RANBP2	RAN binding protein 2 [Source:HGNC Symbol;Acc:HGNC:9848]	2	108719481	108785811	q13	1
ENSG00000115415	23390	-0.281	0.084	-3.366	0.00076193	0.01076	down	STAT1	signal transducer and activator of transcription 1 [Source:HGNC Symbol;Acc:HGNC:11362]	2	190964358	191020960	q32.2	-1
ENSG00000170312	985.737	-0.73	0.217	-3.361	0.00077698	0.01093	down	CDK1	cyclin dependent kinase 1 [Source:HGNC Symbol;Acc:HGNC:1722]	10	60778331	60794852	q21.2	1
ENSG00000177150	485.265	-0.456	0.136	-3.36	0.00077822	0.01093	down	FAM210A	family with sequence similarity 210 member A [Source:HGNC Symbol;Acc:HGNC:28346]	18	13663347	13726663	p11.21	-1
ENSG00000164347	1197.73	-0.339	0.101	-3.36	0.00077958	0.01094	down	GFM2	G elongation factor mitochondrial 2 [Source:HGNC Symbol;Acc:HGNC:29682]	5	74721204	74767371	q13.3	-1
ENSG00000213585	6847.23	-0.229	0.068	-3.358	0.00078552	0.01101	down	VDAC1	voltage dependent anion channel 1 [Source:HGNC Symbol;Acc:HGNC:12669]	5	133971915	134005133	q31.1	-1
ENSG00000198130	1043.59	-0.367	0.109	-3.355	0.00079245	0.01109	down	HIBCH	3-hydroxyisobutyryl-CoA hydrolase [Source:HGNC Symbol;Acc:HGNC:4908]	2	190189735	190344193	q32.2	-1
ENSG00000115902	3303.04	-0.356	0.106	-3.354	0.00079667	0.01112	down	SLC1A4	solute carrier family 1 member 4 [Source:HGNC Symbol;Acc:HGNC:10942]	2	64988477	65023865	p14	1
ENSG00000255717	622.539	-0.43	0.128	-3.348	0.00081264	0.01131	down	SNHG1	small nucleolar RNA host gene 1 [Source:HGNC Symbol;Acc:HGNC:32688]	11	62851988	62855914	q12.3	-1
ENSG00000067167	12459.8	-0.414	0.124	-3.346	0.00082103	0.01139	down	TRAM1	translocation associated membrane protein 1 [Source:HGNC Symbol;Acc:HGNC:20568]	8	70573442	70608387	q13.3	-1
ENSG00000170456	587.79	-0.474	0.142	-3.343	0.00082873	0.01148	down	DENND5B	DENN domain containing 5B [Source:HGNC Symbol;Acc:HGNC:28338]	12	31382223	31591097	p11.21	-1
ENSG00000119922	6109.88	-1.053	0.315	-3.339	0.00084109	0.01162	down	IFIT2	interferon induced protein with tetratricopeptide repeats 2 [Source:HGNC Symbol;Acc:HGNC:5409]	10	89283694	89309276	q23.31	1
ENSG00000129071	3660.37	-0.332	0.1	-3.335	0.00085149	0.01173	down	MBD4	methyl-CpG binding domain 4, DNA glycosylase [Source:HGNC Symbol;Acc:HGNC:6919]	3	129430944	129440179	q21.3	-1
ENSG00000204138	986.993	-0.332	0.1	-3.336	0.00085084	0.01173	down	PHACTR4	phosphatase and actin regulator 4 [Source:HGNC Symbol;Acc:HGNC:25793]	1	28369582	28500369	p35.3	1
ENSG00000134986	211.43	-0.85	0.255	-3.33	0.00086984	0.01187	down	NREP	neuronal regeneration related protein [Source:HGNC Symbol;Acc:HGNC:16834]	5	111662621	111997464	q22.1	-1
ENSG00000153107	819.639	-0.405	0.122	-3.329	0.00087069	0.01187	down	ANAPC1	anaphase promoting complex subunit 1 [Source:HGNC Symbol;Acc:HGNC:19988]	2	111611639	111884690	q13	-1
ENSG00000059758	1451.96	-0.391	0.117	-3.33	0.00086817	0.01187	down	CDK17	cyclin dependent kinase 17 [Source:HGNC Symbol;Acc:HGNC:8750]	12	96278261	96400560	q23.1	-1
ENSG00000180530	1652.66	-0.399	0.12	-3.327	0.00087825	0.01196	down	NRIP1	nuclear receptor interacting protein 1 [Source:HGNC Symbol;Acc:HGNC:8001]	21	14961235	15065936	q21.1	-1
ENSG00000068796	2474.58	-0.39	0.117	-3.322	0.00089277	0.01206	down	KIF2A	kinesin family member 2A [Source:HGNC Symbol;Acc:HGNC:6318]	5	62306162	62537249	q12.1	1
ENSG00000122034	2404.73	-0.279	0.084	-3.322	0.00089486	0.01207	down	GTF3A	general transcription factor IIIA [Source:HGNC Symbol;Acc:HGNC:4662]	13	27424544	27435823	q12.2	1
ENSG00000210196	2671.1	-0.406	0.123	-3.315	0.00091602	0.01234	down	MT-TP	mitochondrially encoded tRNA proline [Source:HGNC Symbol;Acc:HGNC:7494]	MT	15956	16023		-1
ENSG00000125944	2637.84	-0.303	0.091	-3.314	0.00091996	0.01236	down	HNRNPR	heterogeneous nuclear ribonucleoprotein R [Source:HGNC Symbol;Acc:HGNC:5047]	1	23303771	23344336	p36.12	-1
ENSG00000144848	2466.19	-0.318	0.096	-3.31	0.00093132	0.0125	down	ATG3	autophagy related 3 [Source:HGNC Symbol;Acc:HGNC:20962]	3	112532509	112562046	q13.2	-1
ENSG00000278133	129.509	-0.829	0.25	-3.309	0.00093766	0.01252	down			16	31122235	31124064	p11.2	1
ENSG00000104131	2672.17	-0.43	0.13	-3.309	0.00093739	0.01252	down	EIF3J	eukaryotic translation initiation factor 3 subunit J [Source:HGNC Symbol;Acc:HGNC:3270]	15	44537057	44563029	q21.1	1
ENSG00000136758	8448.97	-0.293	0.088	-3.307	0.000943	0.01257	down	YME1L1	YME1 like 1 ATPase [Source:HGNC Symbol;Acc:HGNC:12843]	10	27110112	27155266	p12.1	-1
ENSG00000115541	608.306	-0.529	0.16	-3.306	0.00094604	0.01259	down	HSPE1	heat shock protein family E (Hsp10) member 1 [Source:HGNC Symbol;Acc:HGNC:5269]	2	197499994	197503457	q33.1	1
ENSG00000108094	4118.8	-0.368	0.111	-3.303	0.00095519	0.0127	down	CUL2	cullin 2 [Source:HGNC Symbol;Acc:HGNC:2552]	10	35008551	35090642	p11.21	-1
ENSG00000145868	2077.54	-0.272	0.082	-3.301	0.00096264	0.01275	down	FBXO38	F-box protein 38 [Source:HGNC Symbol;Acc:HGNC:28844]	5	148383935	148442836	q32	1
ENSG00000168214	6217.08	-0.341	0.103	-3.299	0.00097193	0.01281	down	RBPJ	recombination signal binding protein for immunoglobulin kappa J region [Source:HGNC Symbol;Acc:HGNC:5724]	4	26163455	26435131	p15.2	1
ENSG00000105176	1283.58	-0.339	0.103	-3.298	0.00097471	0.01282	down	URI1	URI1, prefoldin like chaperone [Source:HGNC Symbol;Acc:HGNC:13236]	19	29923644	30016608	q12	1
ENSG00000112406	1889.24	-0.417	0.126	-3.295	0.00098519	0.01293	down	HECA	hdc homolog, cell cycle regulator [Source:HGNC Symbol;Acc:HGNC:21041]	6	139135112	139180802	q24.1	1
ENSG00000138777	3113.1	-0.39	0.118	-3.295	0.00098565	0.01293	down	PPA2	pyrophosphatase (inorganic) 2 [Source:HGNC Symbol;Acc:HGNC:28883]	4	105369077	105474081	q24	-1
ENSG00000196715	1698.51	-0.346	0.105	-3.294	0.00098775	0.01295	down	VKORC1L1	vitamin K epoxide reductase complex subunit 1 like 1 [Source:HGNC Symbol;Acc:HGNC:21492]	7	65873267	65959563	q11.21	1
ENSG00000144228	1127.42	-0.472	0.143	-3.293	0.00099013	0.01296	down	SPOPL	speckle type BTB/POZ protein like [Source:HGNC Symbol;Acc:HGNC:27934]	2	138501801	138573547	q22.1	1
ENSG00000128708	1950.12	-0.372	0.113	-3.291	0.0009981	0.01303	down	HAT1	histone acetyltransferase 1 [Source:HGNC Symbol;Acc:HGNC:4821]	2	171922448	171983682	q31.1	1
ENSG00000072571	746.906	-0.625	0.19	-3.289	0.00100471	0.01308	down	HMMR	hyaluronan mediated motility receptor [Source:HGNC Symbol;Acc:HGNC:5012]	5	163460203	163491945	q34	1
ENSG00000100796	2240.27	-0.342	0.104	-3.29	0.00100362	0.01308	down	PPP4R3A	protein phosphatase 4 regulatory subunit 3A [Source:HGNC Symbol;Acc:HGNC:20219]	14	91457611	91510554	q32.12	-1
ENSG00000132294	7716.08	-0.316	0.096	-3.286	0.00101443	0.01318	down	EFR3A	EFR3 homolog A [Source:HGNC Symbol;Acc:HGNC:28970]	8	131904088	132013642	q24.22	1
ENSG00000168522	1439.52	-0.369	0.113	-3.282	0.0010322	0.01337	down	FNTA	farnesyltransferase, CAAX box, alpha [Source:HGNC Symbol;Acc:HGNC:3782]	8	43034194	43085788	p11.21	1
ENSG00000169116	145.847	-0.852	0.26	-3.28	0.00103771	0.01343	down	PARM1	prostate androgen-regulated mucin-like protein 1 [Source:HGNC Symbol;Acc:HGNC:24536]	4	74933095	75050115	q13.3	1
ENSG00000173692	5303.87	-0.218	0.066	-3.279	0.00104102	0.01345	down	PSMD1	proteasome 26S subunit, non-ATPase 1 [Source:HGNC Symbol;Acc:HGNC:9554]	2	231056864	231172827	q37.1	1
ENSG00000163659	1219.42	-0.394	0.12	-3.279	0.00104288	0.01346	down	TIPARP	TCDD inducible poly(ADP-ribose) polymerase [Source:HGNC Symbol;Acc:HGNC:23696]	3	156673235	156706770	q25.31	1
ENSG00000171914	249.661	-0.648	0.198	-3.278	0.00104594	0.01348	down	TLN2	talin 2 [Source:HGNC Symbol;Acc:HGNC:15447]	15	62390526	62844631	q22.2	1
ENSG00000173198	553.191	-0.521	0.159	-3.277	0.00104788	0.01349	down	CYSLTR1	cysteinyl leukotriene receptor 1 [Source:HGNC Symbol;Acc:HGNC:17451]	X	78271464	78327691	q21.1	-1
ENSG00000117593	1779.65	-0.384	0.117	-3.277	0.00104926	0.01349	down	DARS2	aspartyl-tRNA synthetase 2, mitochondrial [Source:HGNC Symbol;Acc:HGNC:25538]	1	173824503	173858546	q25.1	1
ENSG00000138430	2051.78	-0.35	0.107	-3.274	0.00105923	0.0136	down	OLA1	Obg like ATPase 1 [Source:HGNC Symbol;Acc:HGNC:28833]	2	174072447	174248698	q31.1	-1
ENSG00000117758	3176.97	-0.314	0.096	-3.273	0.00106333	0.01364	down	STX12	syntaxin 12 [Source:HGNC Symbol;Acc:HGNC:11430]	1	27773183	27824452	p35.3	1
ENSG00000110958	6251.56	-0.414	0.127	-3.271	0.00107067	0.0137	down	PTGES3	prostaglandin E synthase 3 [Source:HGNC Symbol;Acc:HGNC:16049]	12	56663341	56688408	q13.3	-1
ENSG00000164211	5821.1	-0.424	0.13	-3.269	0.0010811	0.01379	down	STARD4	StAR related lipid transfer domain containing 4 [Source:HGNC Symbol;Acc:HGNC:18058]	5	111496033	111512590	q22.1	-1
ENSG00000198513	339.989	-0.531	0.163	-3.263	0.00110094	0.01402	down	ATL1	atlastin GTPase 1 [Source:HGNC Symbol;Acc:HGNC:11231]	14	50532509	50633068	q22.1	1
ENSG00000132334	3545.73	-0.245	0.075	-3.263	0.00110141	0.01402	down	PTPRE	protein tyrosine phosphatase, receptor type E [Source:HGNC Symbol;Acc:HGNC:9669]	10	127907061	128085855	q26.2	1
ENSG00000136518	760.308	-0.418	0.128	-3.261	0.0011084	0.01405	down	ACTL6A	actin like 6A [Source:HGNC Symbol;Acc:HGNC:24124]	3	179562880	179588408	q26.33	1
ENSG00000153147	4625.52	-0.367	0.113	-3.261	0.00110935	0.01405	down	SMARCA5	SWI/SNF related, matrix associated, actin dependent regulator of chromatin, subfamily a, member 5 [Source:HGNC Symbol;Acc:HGNC:11101]	4	143513463	143557486	q31.21	1
ENSG00000129083	6765.2	-0.269	0.082	-3.261	0.00110986	0.01405	down	COPB1	coatomer protein complex subunit beta 1 [Source:HGNC Symbol;Acc:HGNC:2231]	11	14443440	14500027	p15.2	-1
ENSG00000168615	18074.2	-0.259	0.079	-3.262	0.00110577	0.01405	down	ADAM9	ADAM metallopeptidase domain 9 [Source:HGNC Symbol;Acc:HGNC:216]	8	38996869	39105144	p11.22	1
ENSG00000111716	10909.6	-0.205	0.063	-3.26	0.00111468	0.01408	down	LDHB	lactate dehydrogenase B [Source:HGNC Symbol;Acc:HGNC:6541]	12	21635342	21757857	p12.1	-1
ENSG00000114850	7348.94	-0.322	0.099	-3.257	0.0011258	0.01415	down	SSR3	signal sequence receptor subunit 3 [Source:HGNC Symbol;Acc:HGNC:11325]	3	156540140	156555184	q25.31	-1
ENSG00000113643	2819.29	-0.313	0.096	-3.257	0.00112418	0.01415	down	RARS	arginyl-tRNA synthetase [Source:HGNC Symbol;Acc:HGNC:9870]	5	168486445	168519299	q34	1
ENSG00000259225	1292.22	-0.352	0.108	-3.256	0.00112984	0.01418	down	LINC02345	long intergenic non-protein coding RNA 2345 [Source:HGNC Symbol;Acc:HGNC:53267]	15	37984766	38062340	q14	1
ENSG00000118412	761.242	-0.491	0.151	-3.255	0.00113359	0.01421	down	CASP8AP2	caspase 8 associated protein 2 [Source:HGNC Symbol;Acc:HGNC:1510]	6	89829894	89874436	q15	1
ENSG00000123975	443.247	-0.557	0.171	-3.254	0.00113619	0.01423	down	CKS2	CDC28 protein kinase regulatory subunit 2 [Source:HGNC Symbol;Acc:HGNC:2000]	9	89311198	89316703	q22.2	1
ENSG00000078124	4374.8	-0.346	0.106	-3.251	0.0011516	0.01437	down	ACER3	alkaline ceramidase 3 [Source:HGNC Symbol;Acc:HGNC:16066]	11	76860867	77026797	q13.5	1
ENSG00000138182	743.823	-0.639	0.197	-3.25	0.00115496	0.01439	down	KIF20B	kinesin family member 20B [Source:HGNC Symbol;Acc:HGNC:7212]	10	89701610	89774939	q23.31	1
ENSG00000251562	8186.06	-0.443	0.136	-3.247	0.00116552	0.01449	down	MALAT1	metastasis associated lung adenocarcinoma transcript 1 (non-protein coding) [Source:HGNC Symbol;Acc:HGNC:29665]	11	65497688	65506516	q13.1	1
ENSG00000123219	263.515	-0.788	0.243	-3.241	0.00119072	0.01475	down	CENPK	centromere protein K [Source:HGNC Symbol;Acc:HGNC:29479]	5	65517766	65563171	q12.3	-1
ENSG00000169251	1770.86	-0.331	0.102	-3.241	0.00119294	0.01476	down	NMD3	NMD3 ribosome export adaptor [Source:HGNC Symbol;Acc:HGNC:24250]	3	161104696	161253532	q26.1	1
ENSG00000185070	916.802	-0.372	0.115	-3.239	0.0011983	0.01481	down	FLRT2	fibronectin leucine rich transmembrane protein 2 [Source:HGNC Symbol;Acc:HGNC:3761]	14	85530144	85654426	q31.3	1
ENSG00000164219	1145.31	-0.418	0.129	-3.239	0.00120064	0.01482	down	PGGT1B	protein geranylgeranyltransferase type I subunit beta [Source:HGNC Symbol;Acc:HGNC:8895]	5	115204012	115262872	q22.3	-1
ENSG00000197747	3255.49	-0.307	0.095	-3.237	0.00120708	0.01486	down	S100A10	S100 calcium binding protein A10 [Source:HGNC Symbol;Acc:HGNC:10487]	1	151982915	151994390	q21.3	-1
ENSG00000080824	55180.5	-0.295	0.091	-3.237	0.00120889	0.01486	down	HSP90AA1	heat shock protein 90 alpha family class A member 1 [Source:HGNC Symbol;Acc:HGNC:5253]	14	102080738	102139699	q32.31	-1
ENSG00000145703	5842.23	-0.254	0.079	-3.231	0.00123312	0.01511	down	IQGAP2	IQ motif containing GTPase activating protein 2 [Source:HGNC Symbol;Acc:HGNC:6111]	5	76403249	76708132	q13.3	1
ENSG00000101347	16165.7	-0.203	0.063	-3.23	0.00123675	0.01513	down	SAMHD1	SAM and HD domain containing deoxynucleoside triphosphate triphosphohydrolase 1 [Source:HGNC Symbol;Acc:HGNC:15925]	20	36889773	36951901	q11.23	-1
ENSG00000154719	708.803	-0.392	0.122	-3.229	0.00124237	0.01518	down	MRPL39	mitochondrial ribosomal protein L39 [Source:HGNC Symbol;Acc:HGNC:14027]	21	25585656	25607517	q21.3	-1
ENSG00000143702	2800.97	-0.349	0.108	-3.227	0.00125076	0.01524	down	CEP170	centrosomal protein 170 [Source:HGNC Symbol;Acc:HGNC:28920]	1	243124428	243255348	q43	-1
ENSG00000165244	204.541	-1.172	0.363	-3.223	0.00126646	0.01531	down	ZNF367	zinc finger protein 367 [Source:HGNC Symbol;Acc:HGNC:18320]	9	96385941	96418329	q22.32	-1
ENSG00000156170	596.901	-0.506	0.157	-3.224	0.00126422	0.01531	down	NDUFAF6	NADH:ubiquinone oxidoreductase complex assembly factor 6 [Source:HGNC Symbol;Acc:HGNC:28625]	8	94895767	95116455	q22.1	1
ENSG00000128050	1886.98	-0.445	0.138	-3.223	0.00126684	0.01531	down	PAICS	phosphoribosylaminoimidazole carboxylase and phosphoribosylaminoimidazolesuccinocarboxamide synthase [Source:HGNC Symbol;Acc:HGNC:8587]	4	56435741	56464579	q12	1
ENSG00000197506	11863.4	-0.296	0.092	-3.223	0.00126728	0.01531	down	SLC28A3	solute carrier family 28 member 3 [Source:HGNC Symbol;Acc:HGNC:16484]	9	84275457	84340683	q21.33	-1
ENSG00000085760	1902.07	-0.295	0.091	-3.223	0.00126812	0.01531	down	MTIF2	mitochondrial translational initiation factor 2 [Source:HGNC Symbol;Acc:HGNC:7441]	2	55236595	55269347	p16.1	-1
ENSG00000156026	1907.3	-0.321	0.1	-3.221	0.00127642	0.0154	down	MCU	mitochondrial calcium uniporter [Source:HGNC Symbol;Acc:HGNC:23526]	10	72692131	72887694	q22.1	1
ENSG00000166411	524.017	-0.575	0.178	-3.22	0.00128382	0.01547	down	IDH3A	isocitrate dehydrogenase 3 (NAD(+)) alpha [Source:HGNC Symbol;Acc:HGNC:5384]	15	78131498	78171949	q25.1	1
ENSG00000100934	2881.46	-0.258	0.08	-3.216	0.00129829	0.0156	down	SEC23A	Sec23 homolog A, coat complex II component [Source:HGNC Symbol;Acc:HGNC:10701]	14	39031919	39109646	q21.1	-1
ENSG00000184661	222.286	-0.936	0.291	-3.215	0.0013062	0.01566	down	CDCA2	cell division cycle associated 2 [Source:HGNC Symbol;Acc:HGNC:14623]	8	25458997	25507920	p21.2	1
ENSG00000163162	2701.11	-0.295	0.092	-3.213	0.00131252	0.0157	down	RNF149	ring finger protein 149 [Source:HGNC Symbol;Acc:HGNC:23137]	2	101271219	101308701	q11.2	-1
ENSG00000081237	21179.4	-0.254	0.079	-3.212	0.00131707	0.01574	down	PTPRC	protein tyrosine phosphatase, receptor type C [Source:HGNC Symbol;Acc:HGNC:9666]	1	198638457	198757476	q31.3	1
ENSG00000234883	564.998	-0.62	0.193	-3.209	0.00133338	0.01591	down	MIR155HG	MIR155 host gene [Source:HGNC Symbol;Acc:HGNC:35460]	21	25561909	25575168	q21.3	1
ENSG00000139173	986.178	-0.401	0.125	-3.208	0.0013361	0.01592	down	TMEM117	transmembrane protein 117 [Source:HGNC Symbol;Acc:HGNC:25308]	12	43835967	44389762	q12	1
ENSG00000156642	3881.15	-0.224	0.07	-3.208	0.00133862	0.01592	down	NPTN	neuroplastin [Source:HGNC Symbol;Acc:HGNC:17867]	15	73560014	73634134	q24.1	-1
ENSG00000109805	636.421	-0.753	0.235	-3.207	0.00134172	0.01594	down	NCAPG	non-SMC condensin I complex subunit G [Source:HGNC Symbol;Acc:HGNC:24304]	4	17810902	17844862	p15.31	1
ENSG00000253729	3566.65	-0.26	0.081	-3.207	0.0013432	0.01594	down	PRKDC	protein kinase, DNA-activated, catalytic polypeptide [Source:HGNC Symbol;Acc:HGNC:9413]	8	47773108	47960183	q11.21	-1
ENSG00000140030	926.013	-0.385	0.12	-3.204	0.00135602	0.01607	down	GPR65	G protein-coupled receptor 65 [Source:HGNC Symbol;Acc:HGNC:4517]	14	88005124	88014811	q31.3	1
ENSG00000163636	2045.46	-0.288	0.09	-3.2	0.00137531	0.01626	down	PSMD6	proteasome 26S subunit, non-ATPase 6 [Source:HGNC Symbol;Acc:HGNC:9564]	3	64010549	64024010	p14.1	-1
ENSG00000038210	779.133	-0.574	0.179	-3.198	0.00138182	0.01632	down	PI4K2B	phosphatidylinositol 4-kinase type 2 beta [Source:HGNC Symbol;Acc:HGNC:18215]	4	25233975	25279092	p15.2	1
ENSG00000102054	2500.01	-0.277	0.087	-3.196	0.00139374	0.01644	down	RBBP7	RB binding protein 7, chromatin remodeling factor [Source:HGNC Symbol;Acc:HGNC:9890]	X	16839283	16870414	p22.2	-1
ENSG00000107949	807.408	-0.419	0.131	-3.194	0.00140229	0.0165	down	BCCIP	BRCA2 and CDKN1A interacting protein [Source:HGNC Symbol;Acc:HGNC:978]	10	125823546	125853695	q26.2	1
ENSG00000138246	5535.24	-0.29	0.091	-3.194	0.00140163	0.0165	down	DNAJC13	DnaJ heat shock protein family (Hsp40) member C13 [Source:HGNC Symbol;Acc:HGNC:30343]	3	132417526	132539032	q22.1	1
ENSG00000069956	3433.55	-0.338	0.106	-3.193	0.00140695	0.01652	down	MAPK6	mitogen-activated protein kinase 6 [Source:HGNC Symbol;Acc:HGNC:6879]	15	51952106	52067372	q21.2	1
ENSG00000168092	2366.03	-0.31	0.097	-3.193	0.00140623	0.01652	down	PAFAH1B2	platelet activating factor acetylhydrolase 1b catalytic subunit 2 [Source:HGNC Symbol;Acc:HGNC:8575]	11	117144267	117176894	q23.3	1
ENSG00000134318	1669.62	-0.365	0.114	-3.192	0.0014124	0.01656	down	ROCK2	Rho associated coiled-coil containing protein kinase 2 [Source:HGNC Symbol;Acc:HGNC:10252]	2	11179761	11348330	p25.1	-1
ENSG00000122545	7579.35	-0.33	0.103	-3.192	0.00141512	0.01658	down	2007-09-01	septin 7 [Source:HGNC Symbol;Acc:HGNC:1717]	7	35800932	35907105	p14.2	1
ENSG00000139163	4909.99	-0.412	0.129	-3.19	0.00142281	0.01659	down	ETNK1	ethanolamine kinase 1 [Source:HGNC Symbol;Acc:HGNC:24649]	12	22625075	22690665	p12.1	1
ENSG00000135535	34798	-0.373	0.117	-3.19	0.00142326	0.01659	down	CD164	CD164 molecule [Source:HGNC Symbol;Acc:HGNC:1632]	6	109366514	109382812	q21	-1
ENSG00000136450	3822.64	-0.324	0.102	-3.189	0.00142986	0.01665	down	SRSF1	serine and arginine rich splicing factor 1 [Source:HGNC Symbol;Acc:HGNC:10780]	17	58003360	58007346	q22	-1
ENSG00000114166	1337.73	-0.365	0.114	-3.187	0.00143853	0.01673	down	KAT2B	lysine acetyltransferase 2B [Source:HGNC Symbol;Acc:HGNC:8638]	3	20040023	20154404	p24.3	1
ENSG00000119335	6804.91	-0.276	0.087	-3.187	0.00143941	0.01673	down	SET	SET nuclear proto-oncogene [Source:HGNC Symbol;Acc:HGNC:10760]	9	128683424	128696400	q34.11	1
ENSG00000014824	3033.78	-0.348	0.109	-3.184	0.00145168	0.01683	down	SLC30A9	solute carrier family 30 member 9 [Source:HGNC Symbol;Acc:HGNC:1329]	4	41990472	42090457	p13	1
ENSG00000125735	1112.42	-0.467	0.147	-3.183	0.001459	0.01688	down	TNFSF14	TNF superfamily member 14 [Source:HGNC Symbol;Acc:HGNC:11930]	19	6661253	6670588	p13.3	-1
ENSG00000142197	3441.06	-0.308	0.097	-3.181	0.00146722	0.01695	down	DOPEY2	dopey family member 2 [Source:HGNC Symbol;Acc:HGNC:1291]	21	36156782	36294274	q22.12	1
ENSG00000144357	2839.94	-0.304	0.096	-3.18	0.00147027	0.01697	down	UBR3	ubiquitin protein ligase E3 component n-recognin 3 (putative) [Source:HGNC Symbol;Acc:HGNC:30467]	2	169827458	170084131	q31.1	1
ENSG00000125868	3535.55	-0.345	0.109	-3.178	0.00148181	0.01708	down	DSTN	destrin, actin depolymerizing factor [Source:HGNC Symbol;Acc:HGNC:15750]	20	17569863	17609919	p12.1	1
ENSG00000155438	687.286	-0.402	0.127	-3.175	0.0015006	0.01722	down	NIFK	nucleolar protein interacting with the FHA domain of MKI67 [Source:HGNC Symbol;Acc:HGNC:17838]	2	121726945	121736923	q14.3	-1
ENSG00000139218	8538.53	-0.359	0.113	-3.173	0.00151015	0.01727	down	SCAF11	SR-related CTD associated factor 11 [Source:HGNC Symbol;Acc:HGNC:10784]	12	45919131	45992120	q12	-1
ENSG00000035141	875.52	-0.374	0.118	-3.171	0.00151656	0.01729	down	FAM136A	family with sequence similarity 136 member A [Source:HGNC Symbol;Acc:HGNC:25911]	2	70295975	70302090	p13.3	-1
ENSG00000225630	4426.99	-0.317	0.1	-3.172	0.00151567	0.01729	down	MTND2P28	mitochondrially encoded NADH:ubiquinone oxidoreductase core subunit 2 pseudogene 28 [Source:HGNC Symbol;Acc:HGNC:42129]	1	629640	630683	p36.33	1
ENSG00000091140	7122.73	-0.321	0.101	-3.169	0.00152877	0.01741	down	DLD	dihydrolipoamide dehydrogenase [Source:HGNC Symbol;Acc:HGNC:2898]	7	107890970	107931730	q31.1	1
ENSG00000138081	1174.4	-0.399	0.126	-3.167	0.00154266	0.01752	down	FBXO11	F-box protein 11 [Source:HGNC Symbol;Acc:HGNC:13590]	2	47789316	47905793	p16.3	-1
ENSG00000138069	13873.2	-0.295	0.093	-3.167	0.0015411	0.01752	down	RAB1A	RAB1A, member RAS oncogene family [Source:HGNC Symbol;Acc:HGNC:9758]	2	65070701	65130106	p14	-1
ENSG00000123562	3888.2	-0.232	0.073	-3.166	0.00154679	0.01755	down	MORF4L2	mortality factor 4 like 2 [Source:HGNC Symbol;Acc:HGNC:16849]	X	103675496	103688158	q22.2	-1
ENSG00000173726	3197.3	-0.289	0.091	-3.164	0.00155857	0.01766	down	TOMM20	translocase of outer mitochondrial membrane 20 [Source:HGNC Symbol;Acc:HGNC:20947]	1	235109336	235128936	q42.3	-1
ENSG00000153214	2927.66	-0.366	0.116	-3.163	0.00156069	0.01767	down	TMEM87B	transmembrane protein 87B [Source:HGNC Symbol;Acc:HGNC:25913]	2	112055223	112119318	q13	1
ENSG00000198734	171.123	-0.824	0.261	-3.162	0.00156807	0.01773	down	F5	coagulation factor V [Source:HGNC Symbol;Acc:HGNC:3542]	1	169514166	169586588	q24.2	-1
ENSG00000164654	1065.41	-0.355	0.112	-3.161	0.00156985	0.01773	down	MIOS	meiosis regulator for oocyte development [Source:HGNC Symbol;Acc:HGNC:21905]	7	7566872	7608929	p21.3	1
ENSG00000004700	2058.59	-0.321	0.102	-3.158	0.00159076	0.01783	down	RECQL	RecQ like helicase [Source:HGNC Symbol;Acc:HGNC:9948]	12	21468911	21501669	p12.1	-1
ENSG00000115484	3583.67	-0.295	0.093	-3.157	0.00159536	0.01786	down	CCT4	chaperonin containing TCP1 subunit 4 [Source:HGNC Symbol;Acc:HGNC:1617]	2	61868089	61888804	p15	-1
ENSG00000121152	9378.23	-0.423	0.134	-3.155	0.00160379	0.01792	down	NCAPH	non-SMC condensin I complex subunit H [Source:HGNC Symbol;Acc:HGNC:1112]	2	96335787	96373845	q11.2	1
ENSG00000134987	1869.47	-0.327	0.104	-3.154	0.00161063	0.01795	down	WDR36	WD repeat domain 36 [Source:HGNC Symbol;Acc:HGNC:30696]	5	111091716	111130502	q22.1	1
ENSG00000134057	734.225	-0.477	0.151	-3.153	0.00161452	0.01796	down	CCNB1	cyclin B1 [Source:HGNC Symbol;Acc:HGNC:1579]	5	69167010	69178245	q13.2	1
ENSG00000198900	2852.32	-0.304	0.096	-3.153	0.00161372	0.01796	down	TOP1	DNA topoisomerase I [Source:HGNC Symbol;Acc:HGNC:11986]	20	41028818	41124487	q12	1
ENSG00000162645	2389.83	-0.322	0.102	-3.15	0.0016327	0.01811	down	GBP2	guanylate binding protein 2 [Source:HGNC Symbol;Acc:HGNC:4183]	1	89106132	89150456	p22.2	-1
ENSG00000078618	6480.24	-0.234	0.074	-3.15	0.00163312	0.01811	down	NRDC	nardilysin convertase [Source:HGNC Symbol;Acc:HGNC:7995]	1	51789191	51878937	p32.3	-1
ENSG00000197265	946.886	-0.386	0.123	-3.145	0.00165838	0.01834	down	GTF2E2	general transcription factor IIE subunit 2 [Source:HGNC Symbol;Acc:HGNC:4651]	8	30578318	30658251	p12	-1
ENSG00000004779	1079.03	-0.333	0.106	-3.145	0.00165945	0.01834	down	NDUFAB1	NADH:ubiquinone oxidoreductase subunit AB1 [Source:HGNC Symbol;Acc:HGNC:7694]	16	23581002	23596356	p12.2	-1
ENSG00000181061	1701.68	-0.425	0.135	-3.145	0.00166301	0.01836	down	HIGD1A	HIG1 hypoxia inducible domain family member 1A [Source:HGNC Symbol;Acc:HGNC:29527]	3	42784298	42804531	p22.1	-1
ENSG00000185404	949.862	-0.33	0.105	-3.143	0.0016731	0.01845	down	SP140L	SP140 nuclear body protein like [Source:HGNC Symbol;Acc:HGNC:25105]	2	230327184	230403732	q37.1	1
ENSG00000251022	416.702	-0.591	0.188	-3.142	0.00167908	0.01849	down	THAP9-AS1	THAP9 antisense RNA 1 [Source:HGNC Symbol;Acc:HGNC:44172]	4	82893009	82900960	q21.22	-1
ENSG00000106392	777.643	-0.466	0.149	-3.139	0.00169813	0.01868	down	C1GALT1	core 1 synthase, glycoprotein-N-acetylgalactosamine 3-beta-galactosyltransferase 1 [Source:HGNC Symbol;Acc:HGNC:24337]	7	7156934	7248651	p22.1	1
ENSG00000121621	137.082	-1.211	0.386	-3.134	0.0017253	0.01894	down	KIF18A	kinesin family member 18A [Source:HGNC Symbol;Acc:HGNC:29441]	11	28020620	28108308	p14.1	-1
ENSG00000163606	170.231	-1.309	0.418	-3.132	0.00173815	0.01906	down	CD200R1	CD200 receptor 1 [Source:HGNC Symbol;Acc:HGNC:24235]	3	112921209	112975122	q13.2	-1
ENSG00000143742	3626.91	-0.384	0.123	-3.13	0.00175075	0.01914	down	SRP9	signal recognition particle 9 [Source:HGNC Symbol;Acc:HGNC:11304]	1	225777813	225790466	q42.12	1
ENSG00000166848	1945.55	-0.291	0.093	-3.13	0.00174734	0.01914	down	TERF2IP	TERF2 interacting protein [Source:HGNC Symbol;Acc:HGNC:19246]	16	75647786	75761872	q23.1	1
ENSG00000169446	1833.02	-0.381	0.122	-3.124	0.00178538	0.01943	down	MMGT1	membrane magnesium transporter 1 [Source:HGNC Symbol;Acc:HGNC:28100]	X	135962070	135974063	q26.3	-1
ENSG00000133657	27314.4	-0.308	0.099	-3.119	0.0018123	0.01966	down	ATP13A3	ATPase 13A3 [Source:HGNC Symbol;Acc:HGNC:24113]	3	194402672	194498364	q29	-1
ENSG00000090060	7312.01	-0.332	0.107	-3.118	0.00182226	0.01971	down	PAPOLA	poly(A) polymerase alpha [Source:HGNC Symbol;Acc:HGNC:14981]	14	96501433	96567111	q32.2	1
ENSG00000163946	3319.84	-0.341	0.109	-3.117	0.00182599	0.01973	down	FAM208A	family with sequence similarity 208 member A [Source:HGNC Symbol;Acc:HGNC:30314]	3	56620133	56683237	p14.3	-1
ENSG00000122566	20436.1	-0.204	0.065	-3.114	0.00184479	0.01984	down	HNRNPA2B1	heterogeneous nuclear ribonucleoprotein A2/B1 [Source:HGNC Symbol;Acc:HGNC:5033]	7	26189927	26201529	p15.2	-1
ENSG00000114127	2589.56	-0.454	0.146	-3.113	0.00185099	0.01985	down	XRN1	5'-3' exoribonuclease 1 [Source:HGNC Symbol;Acc:HGNC:30654]	3	142306607	142448062	q23	-1
ENSG00000108953	7506.94	-0.208	0.067	-3.113	0.00185132	0.01985	down	YWHAE	tyrosine 3-monooxygenase/tryptophan 5-monooxygenase activation protein epsilon [Source:HGNC Symbol;Acc:HGNC:12851]	17	1344272	1400378	p13.3	-1
ENSG00000138018	1718.85	-0.39	0.125	-3.111	0.001865	0.01994	down	SELENOI	selenoprotein I [Source:HGNC Symbol;Acc:HGNC:29361]	2	26308547	26395891	p23.3	1
ENSG00000130638	1586.87	-0.287	0.092	-3.111	0.00186226	0.01994	down	ATXN10	ataxin 10 [Source:HGNC Symbol;Acc:HGNC:10549]	22	45671798	45845307	q13.31	1
ENSG00000263001	1679.15	-0.28	0.09	-3.111	0.00186398	0.01994	down	GTF2I	general transcription factor IIi [Source:HGNC Symbol;Acc:HGNC:4659]	7	74657667	74760692	q11.23	1
ENSG00000012048	783.906	-0.468	0.151	-3.11	0.00186922	0.01996	down	BRCA1	BRCA1, DNA repair associated [Source:HGNC Symbol;Acc:HGNC:1100]	17	43044295	43170245	q21.31	-1
ENSG00000155545	749.569	-0.428	0.138	-3.11	0.00187385	0.01999	down	MIER3	MIER family member 3 [Source:HGNC Symbol;Acc:HGNC:26678]	5	56919602	56971675	q11.2	-1
ENSG00000116161	1972.1	-0.366	0.118	-3.107	0.00188798	0.0201	down	CACYBP	calcyclin binding protein [Source:HGNC Symbol;Acc:HGNC:30423]	1	174999163	175011715	q25.1	1
ENSG00000171492	1571.98	-0.311	0.1	-3.107	0.00189102	0.02011	down	LRRC8D	leucine rich repeat containing 8 VRAC subunit D [Source:HGNC Symbol;Acc:HGNC:16992]	1	89821014	89936611	p22.2	1
ENSG00000185862	5161.06	-0.346	0.111	-3.105	0.00190299	0.02019	down	EVI2B	ecotropic viral integration site 2B [Source:HGNC Symbol;Acc:HGNC:3500]	17	31303766	31314112	q11.2	-1
ENSG00000164647	130.349	-1.051	0.339	-3.102	0.00192177	0.02037	down	STEAP1	STEAP family member 1 [Source:HGNC Symbol;Acc:HGNC:11378]	7	90154375	90164829	q21.13	1
ENSG00000138592	3942.91	-0.324	0.104	-3.1	0.00193295	0.02044	down	USP8	ubiquitin specific peptidase 8 [Source:HGNC Symbol;Acc:HGNC:12631]	15	50424380	50514419	q21.2	1
ENSG00000184752	733.806	-0.366	0.118	-3.099	0.00194223	0.0205	down	NDUFA12	NADH:ubiquinone oxidoreductase subunit A12 [Source:HGNC Symbol;Acc:HGNC:23987]	12	94897055	95003770	q22	-1
ENSG00000165704	792.378	-0.408	0.132	-3.098	0.00194563	0.02052	down	HPRT1	hypoxanthine phosphoribosyltransferase 1 [Source:HGNC Symbol;Acc:HGNC:5157]	X	134460153	134520513	q26.2	1
ENSG00000112245	5075.59	-0.339	0.11	-3.093	0.00197922	0.02083	down	PTP4A1	protein tyrosine phosphatase type IVA, member 1 [Source:HGNC Symbol;Acc:HGNC:9634]	6	63521748	63583587	q12	1
ENSG00000047365	3059.65	-0.386	0.125	-3.091	0.00199808	0.02092	down	ARAP2	ArfGAP with RhoGAP domain, ankyrin repeat and PH domain 2 [Source:HGNC Symbol;Acc:HGNC:16924]	4	35948221	36244509	p14	-1
ENSG00000122026	4769.93	-0.269	0.087	-3.091	0.00199682	0.02092	down	RPL21	ribosomal protein L21 [Source:HGNC Symbol;Acc:HGNC:10313]	13	27251309	27256691	q12.2	1
ENSG00000147650	2439.57	-0.264	0.085	-3.088	0.00201468	0.02105	down	LRP12	LDL receptor related protein 12 [Source:HGNC Symbol;Acc:HGNC:31708]	8	104489231	104589024	q22.3	-1
ENSG00000151491	1552.83	-0.359	0.116	-3.082	0.00205718	0.02143	down	EPS8	epidermal growth factor receptor pathway substrate 8 [Source:HGNC Symbol;Acc:HGNC:3420]	12	15620158	15882329	p12.3	-1
ENSG00000073921	12443	-0.304	0.099	-3.08	0.00207072	0.0215	down	PICALM	phosphatidylinositol binding clathrin assembly protein [Source:HGNC Symbol;Acc:HGNC:15514]	11	85957684	86069882	q14.2	-1
ENSG00000153187	8506.82	-0.244	0.079	-3.08	0.00206892	0.0215	down	HNRNPU	heterogeneous nuclear ribonucleoprotein U [Source:HGNC Symbol;Acc:HGNC:5048]	1	244840638	244864560	q44	-1
ENSG00000159445	452.908	-0.474	0.154	-3.074	0.00211328	0.02185	down	THEM4	thioesterase superfamily member 4 [Source:HGNC Symbol;Acc:HGNC:17947]	1	151873584	151909808	q21.3	-1
ENSG00000146386	1417.56	-0.386	0.125	-3.074	0.00211153	0.02185	down	ABRACL	ABRA C-terminal like [Source:HGNC Symbol;Acc:HGNC:21230]	6	139028682	139043302	q24.1	1
ENSG00000135829	4722.07	-0.255	0.083	-3.075	0.0021083	0.02185	down	DHX9	DExH-box helicase 9 [Source:HGNC Symbol;Acc:HGNC:2750]	1	182839369	182887751	q25.3	1
ENSG00000163297	2542.47	-0.364	0.118	-3.073	0.00211636	0.02186	down	ANTXR2	anthrax toxin receptor 2 [Source:HGNC Symbol;Acc:HGNC:21732]	4	79901149	80125454	q21.21	-1
ENSG00000152270	5553.39	-0.327	0.107	-3.073	0.00212168	0.02189	down	PDE3B	phosphodiesterase 3B [Source:HGNC Symbol;Acc:HGNC:8779]	11	14643723	14872044	p15.2	1
ENSG00000275835	568.032	-0.403	0.131	-3.071	0.00213488	0.02201	down	TUBGCP5	tubulin gamma complex associated protein 5 [Source:HGNC Symbol;Acc:HGNC:18600]	15	22983192	23039673	q11.2	-1
ENSG00000114423	1997.67	-0.333	0.109	-3.068	0.00215523	0.0222	down	CBLB	Cbl proto-oncogene B [Source:HGNC Symbol;Acc:HGNC:1542]	3	105655461	105869552	q13.11	-1
ENSG00000143033	1111.58	-0.332	0.108	-3.067	0.00215979	0.02222	down	MTF2	metal response element binding transcription factor 2 [Source:HGNC Symbol;Acc:HGNC:29535]	1	93079235	93139081	p22.1	1
ENSG00000104331	2742.08	-0.328	0.107	-3.066	0.00217222	0.02225	down	IMPAD1	inositol monophosphatase domain containing 1 [Source:HGNC Symbol;Acc:HGNC:26019]	8	56957933	56993844	q12.1	-1
ENSG00000108588	5042.25	-0.248	0.081	-3.065	0.00217333	0.02225	down	CCDC47	coiled-coil domain containing 47 [Source:HGNC Symbol;Acc:HGNC:24856]	17	63745250	63776351	q23.3	-1
ENSG00000139343	317.803	-0.561	0.183	-3.063	0.00218935	0.02239	down	SNRPF	small nuclear ribonucleoprotein polypeptide F [Source:HGNC Symbol;Acc:HGNC:11162]	12	95858928	95903828	q23.1	1
ENSG00000124532	1980.37	-0.314	0.103	-3.06	0.00221145	0.02257	down	MRS2	MRS2, magnesium transporter [Source:HGNC Symbol;Acc:HGNC:13785]	6	24402908	24426194	p22.3	1
ENSG00000156256	2245.13	-0.357	0.117	-3.059	0.00222193	0.02259	down	USP16	ubiquitin specific peptidase 16 [Source:HGNC Symbol;Acc:HGNC:12614]	21	29024629	29054488	q21.3	1
ENSG00000132963	4742.96	-0.301	0.099	-3.059	0.00221885	0.02259	down	POMP	proteasome maturation protein [Source:HGNC Symbol;Acc:HGNC:20330]	13	28659104	28678925	q12.3	1
ENSG00000132356	2324.04	-0.391	0.128	-3.058	0.00222523	0.0226	down	PRKAA1	protein kinase AMP-activated catalytic subunit alpha 1 [Source:HGNC Symbol;Acc:HGNC:9376]	5	40759379	40798374	p13.1	-1
ENSG00000181350	94.089	-1.123	0.367	-3.057	0.00223562	0.02268	down	LRRC75A	leucine rich repeat containing 75A [Source:HGNC Symbol;Acc:HGNC:32403]	17	16441577	16492153	p11.2	-1
ENSG00000115084	2956.49	-0.394	0.129	-3.056	0.00224304	0.02269	down	SLC35F5	solute carrier family 35 member F5 [Source:HGNC Symbol;Acc:HGNC:23617]	2	113705011	113756823	q14.1	-1
ENSG00000121274	1167.51	-0.389	0.127	-3.056	0.00224113	0.02269	down	PAPD5	poly(A) RNA polymerase D5, non-canonical [Source:HGNC Symbol;Acc:HGNC:30758]	16	50152918	50235310	q12.1	1
ENSG00000166501	2725.07	-0.253	0.083	-3.056	0.0022434	0.02269	down	PRKCB	protein kinase C beta [Source:HGNC Symbol;Acc:HGNC:9395]	16	23835946	24220611	p12.2	1
ENSG00000111142	2949.34	-0.356	0.116	-3.053	0.00226656	0.02284	down	METAP2	methionyl aminopeptidase 2 [Source:HGNC Symbol;Acc:HGNC:16672]	12	95473520	95515839	q22	1
ENSG00000147459	1513.56	-0.271	0.089	-3.053	0.00226741	0.02284	down	DOCK5	dedicator of cytokinesis 5 [Source:HGNC Symbol;Acc:HGNC:23476]	8	25184723	25418082	p21.2	1
ENSG00000138160	849.819	-0.592	0.194	-3.051	0.00227798	0.02288	down	KIF11	kinesin family member 11 [Source:HGNC Symbol;Acc:HGNC:6388]	10	92593286	92655395	q23.33	1
ENSG00000162613	1547.52	-0.296	0.097	-3.052	0.00227581	0.02288	down	FUBP1	far upstream element binding protein 1 [Source:HGNC Symbol;Acc:HGNC:4004]	1	77944055	77979110	p31.1	-1
ENSG00000155926	1702.64	-0.384	0.126	-3.044	0.00233191	0.02337	down	SLA	Src like adaptor [Source:HGNC Symbol;Acc:HGNC:10902]	8	133036724	133103054	q24.22	-1
ENSG00000009335	1976.11	-0.262	0.086	-3.044	0.00233805	0.02339	down	UBE3C	ubiquitin protein ligase E3C [Source:HGNC Symbol;Acc:HGNC:16803]	7	157138913	157269372	q36.3	1
ENSG00000167635	1760.73	-0.37	0.122	-3.041	0.0023589	0.02351	down	ZNF146	zinc finger protein 146 [Source:HGNC Symbol;Acc:HGNC:12931]	19	36214602	36238774	q13.12	1
ENSG00000152518	2297.24	-0.321	0.106	-3.042	0.00235402	0.02351	down	ZFP36L2	ZFP36 ring finger protein like 2 [Source:HGNC Symbol;Acc:HGNC:1108]	2	43222402	43226609	p21	-1
ENSG00000125304	11857.8	-0.282	0.093	-3.041	0.00235974	0.02351	down	TM9SF2	transmembrane 9 superfamily member 2 [Source:HGNC Symbol;Acc:HGNC:11865]	13	99446311	99564006	q32.3	1
ENSG00000064313	1313.33	-0.318	0.105	-3.04	0.00236816	0.02357	down	TAF2	TATA-box binding protein associated factor 2 [Source:HGNC Symbol;Acc:HGNC:11536]	8	119730775	119832863	q24.12	-1
ENSG00000113615	2648.66	-0.344	0.113	-3.039	0.00237388	0.02359	down	SEC24A	SEC24 homolog A, COPII coat complex component [Source:HGNC Symbol;Acc:HGNC:10703]	5	134648789	134727823	q31.1	1
ENSG00000011260	2242.27	-0.265	0.087	-3.039	0.00237227	0.02359	down	UTP18	UTP18, small subunit processome component [Source:HGNC Symbol;Acc:HGNC:24274]	17	51260528	51297936	q21.33	1
ENSG00000166266	1880.61	-0.412	0.136	-3.034	0.0024111	0.02393	down	CUL5	cullin 5 [Source:HGNC Symbol;Acc:HGNC:2556]	11	108008733	108107776	q22.3	1
ENSG00000078304	3271.96	-0.233	0.077	-3.034	0.00241312	0.02393	down	PPP2R5C	protein phosphatase 2 regulatory subunit B'gamma [Source:HGNC Symbol;Acc:HGNC:9311]	14	101761798	101927989	q32.31	1
ENSG00000129515	4943.4	-0.327	0.108	-3.033	0.00241927	0.02397	down	SNX6	sorting nexin 6 [Source:HGNC Symbol;Acc:HGNC:14970]	14	34561094	34630183	q13.1	-1
ENSG00000110172	1509.16	-0.435	0.143	-3.032	0.00243293	0.02408	down	CHORDC1	cysteine and histidine rich domain containing 1 [Source:HGNC Symbol;Acc:HGNC:14525]	11	90201160	90223364	q14.3	-1
ENSG00000085377	1396.46	-0.295	0.097	-3.03	0.00244156	0.02414	down	PREP	prolyl endopeptidase [Source:HGNC Symbol;Acc:HGNC:9358]	6	105277565	105403084	q21	-1
ENSG00000051341	410.645	-0.642	0.212	-3.025	0.00248585	0.02451	down	POLQ	DNA polymerase theta [Source:HGNC Symbol;Acc:HGNC:9186]	3	121431427	121546641	q13.33	-1
ENSG00000123545	417.515	-0.492	0.163	-3.025	0.00248581	0.02451	down	NDUFAF4	NADH:ubiquinone oxidoreductase complex assembly factor 4 [Source:HGNC Symbol;Acc:HGNC:21034]	6	96889313	96897881	q16.1	-1
ENSG00000164975	1147.5	-0.334	0.111	-3.024	0.00249096	0.02453	down	SNAPC3	small nuclear RNA activating complex polypeptide 3 [Source:HGNC Symbol;Acc:HGNC:11136]	9	15422704	15465953	p22.3	1
ENSG00000196371	842.312	-0.416	0.138	-3.024	0.00249782	0.02458	down	FUT4	fucosyltransferase 4 [Source:HGNC Symbol;Acc:HGNC:4015]	11	94543840	94549898	q21	1
ENSG00000136143	2313.43	-0.407	0.135	-3.021	0.00251745	0.0247	down	SUCLA2	succinate-CoA ligase ADP-forming beta subunit [Source:HGNC Symbol;Acc:HGNC:11448]	13	47745736	48037968	q14.2	-1
ENSG00000155508	1477.67	-0.345	0.114	-3.02	0.002527	0.02477	down	CNOT8	CCR4-NOT transcription complex subunit 8 [Source:HGNC Symbol;Acc:HGNC:9207]	5	154857553	154876793	q33.2	1
ENSG00000168291	938.625	-0.323	0.107	-3.019	0.00253531	0.02482	down	PDHB	pyruvate dehydrogenase E1 beta subunit [Source:HGNC Symbol;Acc:HGNC:8808]	3	58427630	58433857	p14.3	-1
ENSG00000152689	4916.69	-0.241	0.08	-3.016	0.00255927	0.02499	down	RASGRP3	RAS guanyl releasing protein 3 [Source:HGNC Symbol;Acc:HGNC:14545]	2	33436324	33564750	p22.3	1
ENSG00000004897	3191.01	-0.351	0.116	-3.014	0.00257687	0.0251	down	CDC27	cell division cycle 27 [Source:HGNC Symbol;Acc:HGNC:1728]	17	47117703	47189422	q21.32	-1
ENSG00000154217	439.586	-0.466	0.155	-3.012	0.00259427	0.02521	down	PITPNC1	phosphatidylinositol transfer protein, cytoplasmic 1 [Source:HGNC Symbol;Acc:HGNC:21045]	17	67377281	67697261	q24.2	1
ENSG00000177119	4314.22	-0.265	0.088	-3.012	0.00259677	0.02521	down	ANO6	anoctamin 6 [Source:HGNC Symbol;Acc:HGNC:25240]	12	45215987	45440404	q12	1
ENSG00000090530	68.486	-1.328	0.441	-3.009	0.00261732	0.02529	down	P3H2	prolyl 3-hydroxylase 2 [Source:HGNC Symbol;Acc:HGNC:19317]	3	189956728	190122437	q28	-1
ENSG00000168404	1360.81	-0.271	0.09	-3.007	0.00263735	0.02543	down	MLKL	mixed lineage kinase domain like pseudokinase [Source:HGNC Symbol;Acc:HGNC:26617]	16	74671855	74700960	q23.1	-1
ENSG00000123609	1518.04	-0.352	0.117	-3.005	0.00265406	0.02557	down	NMI	N-myc and STAT interactor [Source:HGNC Symbol;Acc:HGNC:7854]	2	151270465	151290057	q23.3	-1
ENSG00000120992	3570.4	-0.387	0.129	-3.004	0.00266849	0.02568	down	LYPLA1	lysophospholipase I [Source:HGNC Symbol;Acc:HGNC:6737]	8	54046367	54102017	q11.23	-1
ENSG00000109332	8616.24	-0.279	0.093	-3.002	0.00268014	0.02577	down	UBE2D3	ubiquitin conjugating enzyme E2 D3 [Source:HGNC Symbol;Acc:HGNC:12476]	4	102794383	102868896	q24	-1
ENSG00000153975	486.274	-0.495	0.165	-3.001	0.00269436	0.02588	down	ZUFSP	zinc finger with UFM1 specific peptidase domain [Source:HGNC Symbol;Acc:HGNC:21224]	6	116635618	116668794	q22.1	-1
ENSG00000066279	947.471	-0.742	0.247	-2.999	0.00270942	0.02591	down	ASPM	abnormal spindle microtubule assembly [Source:HGNC Symbol;Acc:HGNC:19048]	1	197084128	197146694	q31.3	-1
ENSG00000166483	243.55	-0.734	0.245	-2.999	0.00271221	0.02591	down	WEE1	WEE1 G2 checkpoint kinase [Source:HGNC Symbol;Acc:HGNC:12761]	11	9573681	9593457	p15.4	1
ENSG00000164022	1326.48	-0.314	0.105	-2.999	0.00270958	0.02591	down	AIMP1	aminoacyl tRNA synthetase complex interacting multifunctional protein 1 [Source:HGNC Symbol;Acc:HGNC:10648]	4	106315544	106349226	q24	1
ENSG00000136021	4511.36	-0.354	0.118	-2.995	0.0027452	0.02615	down	SCYL2	SCY1 like pseudokinase 2 [Source:HGNC Symbol;Acc:HGNC:19286]	12	100267140	100341724	q23.1	1
ENSG00000170759	8928.53	-0.306	0.102	-2.993	0.00275893	0.02623	down	KIF5B	kinesin family member 5B [Source:HGNC Symbol;Acc:HGNC:6324]	10	32009010	32056431	p11.22	-1
ENSG00000163683	3232.55	-0.299	0.1	-2.992	0.00277453	0.02635	down	SMIM14	small integral membrane protein 14 [Source:HGNC Symbol;Acc:HGNC:27321]	4	39546330	39639090	p14	-1
ENSG00000204389	357.438	-0.49	0.164	-2.991	0.00278364	0.02641	down	HSPA1A	heat shock protein family A (Hsp70) member 1A [Source:HGNC Symbol;Acc:HGNC:5232]	6	31815464	31817946	p21.33	1
ENSG00000115364	1466.42	-0.414	0.138	-2.989	0.0028007	0.02655	down	MRPL19	mitochondrial ribosomal protein L19 [Source:HGNC Symbol;Acc:HGNC:14052]	2	75646783	75690851	p12	1
ENSG00000115942	505.423	-0.428	0.143	-2.987	0.00281763	0.02666	down	ORC2	origin recognition complex subunit 2 [Source:HGNC Symbol;Acc:HGNC:8488]	2	200908973	200963680	q33.1	-1
ENSG00000136937	1995.52	-0.291	0.098	-2.984	0.0028412	0.02686	down	NCBP1	nuclear cap binding protein subunit 1 [Source:HGNC Symbol;Acc:HGNC:7658]	9	97633626	97673748	q22.33	1
ENSG00000169504	13651.5	-0.33	0.111	-2.98	0.00288272	0.02718	down	CLIC4	chloride intracellular channel 4 [Source:HGNC Symbol;Acc:HGNC:13518]	1	24745357	24844324	p36.11	1
ENSG00000103769	3180.85	-0.299	0.1	-2.98	0.00288013	0.02718	down	RAB11A	RAB11A, member RAS oncogene family [Source:HGNC Symbol;Acc:HGNC:9760]	15	65726054	65891991	q22.31	1
ENSG00000149218	533.071	-0.401	0.135	-2.978	0.00290147	0.0273	down	ENDOD1	endonuclease domain containing 1 [Source:HGNC Symbol;Acc:HGNC:29129]	11	95089810	95132645	q21	1
ENSG00000085415	1205.85	-0.337	0.113	-2.975	0.00292718	0.02752	down	SEH1L	SEH1 like nucleoporin [Source:HGNC Symbol;Acc:HGNC:30379]	18	12947133	12987536	p11.21	1
ENSG00000135776	1048.51	-0.394	0.132	-2.974	0.0029402	0.02759	down	ABCB10	ATP binding cassette subfamily B member 10 [Source:HGNC Symbol;Acc:HGNC:41]	1	229516582	229558695	q42.13	-1
ENSG00000139505	3924.55	-0.323	0.109	-2.973	0.00295203	0.02768	down	MTMR6	myotubularin related protein 6 [Source:HGNC Symbol;Acc:HGNC:7453]	13	25246201	25288009	q12.13	-1
ENSG00000086598	7572.79	-0.307	0.103	-2.97	0.00297955	0.02788	down	TMED2	transmembrane p24 trafficking protein 2 [Source:HGNC Symbol;Acc:HGNC:16996]	12	123584531	123598577	q24.31	1
ENSG00000180817	896.327	-0.338	0.114	-2.966	0.00301328	0.02815	down	PPA1	pyrophosphatase (inorganic) 1 [Source:HGNC Symbol;Acc:HGNC:9226]	10	70202830	70233911	q22.1	-1
ENSG00000150867	1909.52	-0.245	0.083	-2.965	0.00302824	0.02821	down	PIP4K2A	phosphatidylinositol-5-phosphate 4-kinase type 2 alpha [Source:HGNC Symbol;Acc:HGNC:8997]	10	22534849	22714555	p12.2	-1
ENSG00000171241	695.719	-0.557	0.188	-2.963	0.0030483	0.02834	down	SHCBP1	SHC binding and spindle associated 1 [Source:HGNC Symbol;Acc:HGNC:29547]	16	46580554	46621626	q11.2	-1
ENSG00000006459	1959.91	-0.317	0.107	-2.962	0.00305315	0.02835	down	KDM7A	lysine demethylase 7A [Source:HGNC Symbol;Acc:HGNC:22224]	7	140084746	140177035	q34	-1
ENSG00000151466	463.199	-0.435	0.147	-2.961	0.00306491	0.02839	down	SCLT1	sodium channel and clathrin linker 1 [Source:HGNC Symbol;Acc:HGNC:26406]	4	128864921	129093607	q28.2	-1
ENSG00000165487	1879.34	-0.388	0.131	-2.961	0.00306378	0.02839	down	MICU2	mitochondrial calcium uptake 2 [Source:HGNC Symbol;Acc:HGNC:31830]	13	21492691	21604214	q12.11	-1
ENSG00000132842	4784.66	-0.274	0.093	-2.96	0.00307703	0.02844	down	AP3B1	adaptor related protein complex 3 beta 1 subunit [Source:HGNC Symbol;Acc:HGNC:566]	5	78000525	78294755	q14.1	-1
ENSG00000109919	3501.27	-0.221	0.075	-2.96	0.00307794	0.02844	down	MTCH2	mitochondrial carrier 2 [Source:HGNC Symbol;Acc:HGNC:17587]	11	47617315	47642623	p11.2	-1
ENSG00000137547	1235.9	-0.29	0.098	-2.959	0.00309023	0.02852	down	MRPL15	mitochondrial ribosomal protein L15 [Source:HGNC Symbol;Acc:HGNC:14054]	8	54135210	54147901	q11.23	1
ENSG00000133574	1783.18	-0.281	0.095	-2.957	0.00310624	0.02862	down	GIMAP4	GTPase, IMAP family member 4 [Source:HGNC Symbol;Acc:HGNC:21872]	7	150567277	150573955	q36.1	1
ENSG00000164187	1742.56	-0.41	0.139	-2.957	0.00310989	0.02863	down	LMBRD2	LMBR1 domain containing 2 [Source:HGNC Symbol;Acc:HGNC:25287]	5	36098412	36151961	p13.2	-1
ENSG00000174720	1433.03	-0.307	0.104	-2.956	0.00311928	0.02866	down	LARP7	La ribonucleoprotein domain family member 7 [Source:HGNC Symbol;Acc:HGNC:24912]	4	112636964	112657592	q25	1
ENSG00000119414	2511.6	-0.298	0.101	-2.955	0.00312163	0.02866	down	PPP6C	protein phosphatase 6 catalytic subunit [Source:HGNC Symbol;Acc:HGNC:9323]	9	125146573	125189939	q33.3	-1
ENSG00000166233	2386.97	-0.255	0.086	-2.956	0.00311607	0.02866	down	ARIH1	ariadne RBR E3 ubiquitin protein ligase 1 [Source:HGNC Symbol;Acc:HGNC:689]	15	72474326	72602985	q24.1	1
ENSG00000170396	430.828	-0.444	0.151	-2.953	0.00314686	0.0288	down	ZNF804A	zinc finger protein 804A [Source:HGNC Symbol;Acc:HGNC:21711]	2	184598366	184939492	q32.1	1
ENSG00000108960	737.754	-0.406	0.138	-2.953	0.00314855	0.0288	down	MMD	monocyte to macrophage differentiation associated [Source:HGNC Symbol;Acc:HGNC:7153]	17	55392613	55421992	q22	-1
ENSG00000136108	1267.52	-0.374	0.127	-2.952	0.0031579	0.02886	down	CKAP2	cytoskeleton associated protein 2 [Source:HGNC Symbol;Acc:HGNC:1990]	13	52455429	52476628	q14.3	1
ENSG00000163584	348.25	-0.6	0.203	-2.951	0.00316913	0.02891	down	RPL22L1	ribosomal protein L22 like 1 [Source:HGNC Symbol;Acc:HGNC:27610]	3	170864875	170870483	q26.2	-1
ENSG00000123737	709.041	-0.362	0.123	-2.951	0.00317225	0.02891	down	EXOSC9	exosome component 9 [Source:HGNC Symbol;Acc:HGNC:9137]	4	121801317	121817021	q27	1
ENSG00000135899	363.44	-0.512	0.174	-2.949	0.00319259	0.02904	down	SP110	SP110 nuclear body protein [Source:HGNC Symbol;Acc:HGNC:5401]	2	230167293	230225729	q37.1	-1
ENSG00000253276	613.018	-0.444	0.15	-2.948	0.00319657	0.02904	down	CCDC71L	coiled-coil domain containing 71 like [Source:HGNC Symbol;Acc:HGNC:26685]	7	106656765	106660996	q22.3	-1
ENSG00000145332	916.613	-0.358	0.121	-2.948	0.00319782	0.02904	down	KLHL8	kelch like family member 8 [Source:HGNC Symbol;Acc:HGNC:18644]	4	87160103	87240314	q22.1	-1
ENSG00000158488	96.899	-0.869	0.295	-2.947	0.00320796	0.02908	down	CD1E	CD1e molecule [Source:HGNC Symbol;Acc:HGNC:1638]	1	158353696	158357553	q23.1	1
ENSG00000068784	922.449	-0.313	0.106	-2.946	0.00322313	0.02919	down	SRBD1	S1 RNA binding domain 1 [Source:HGNC Symbol;Acc:HGNC:25521]	2	45388680	45612165	p21	-1
ENSG00000104325	4057.09	-0.214	0.073	-2.944	0.00324489	0.02934	down	DECR1	2,4-dienoyl-CoA reductase 1 [Source:HGNC Symbol;Acc:HGNC:2753]	8	90001405	90052092	q21.3	1
ENSG00000176102	767.04	-0.347	0.118	-2.941	0.00327016	0.02951	down	CSTF3	cleavage stimulation factor subunit 3 [Source:HGNC Symbol;Acc:HGNC:2485]	11	33077188	33162371	p13	-1
ENSG00000154723	2064.52	-0.298	0.101	-2.938	0.00330244	0.02975	down	ATP5PF	ATP synthase peripheral stalk subunit F6 [Source:HGNC Symbol;Acc:HGNC:847]	21	25716503	25735673	q21.3	-1
ENSG00000184635	241.27	-0.62	0.211	-2.938	0.00330612	0.02976	down	ZNF93	zinc finger protein 93 [Source:HGNC Symbol;Acc:HGNC:13169]	19	19900913	19963464	p12	1
ENSG00000170345	333.913	-0.598	0.204	-2.936	0.003329	0.0298	down	FOS	Fos proto-oncogene, AP-1 transcription factor subunit [Source:HGNC Symbol;Acc:HGNC:3796]	14	75278774	75282230	q24.3	1
ENSG00000164209	3395	-0.352	0.12	-2.936	0.00332529	0.0298	down	SLC25A46	solute carrier family 25 member 46 [Source:HGNC Symbol;Acc:HGNC:25198]	5	110738136	110765161	q22.1	1
ENSG00000102547	2050.93	-0.324	0.11	-2.935	0.00333455	0.0298	down	CAB39L	calcium binding protein 39 like [Source:HGNC Symbol;Acc:HGNC:20290]	13	49308650	49444126	q14.2	-1
ENSG00000168904	3185.06	-0.27	0.092	-2.936	0.00332793	0.0298	down	LRRC28	leucine rich repeat containing 28 [Source:HGNC Symbol;Acc:HGNC:28355]	15	99251362	99390729	q26.3	1
ENSG00000198786	117165	-0.254	0.087	-2.935	0.00333293	0.0298	down	MT-ND5	mitochondrially encoded NADH:ubiquinone oxidoreductase core subunit 5 [Source:HGNC Symbol;Acc:HGNC:7461]	MT	12337	14148		1
ENSG00000162521	3443.47	-0.224	0.076	-2.937	0.00331768	0.0298	down	RBBP4	RB binding protein 4, chromatin remodeling factor [Source:HGNC Symbol;Acc:HGNC:9887]	1	32651142	32686211	p35.1	1
ENSG00000095002	1017.58	-0.435	0.148	-2.931	0.00337644	0.03012	down	MSH2	mutS homolog 2 [Source:HGNC Symbol;Acc:HGNC:7325]	2	47402969	47663146	p21	1
ENSG00000166130	947.028	-0.396	0.135	-2.931	0.00338407	0.03016	down	IKBIP	IKBKB interacting protein [Source:HGNC Symbol;Acc:HGNC:26430]	12	98613405	98645113	q23.1	-1
ENSG00000183723	257.398	-0.524	0.179	-2.928	0.00340903	0.03028	down	CMTM4	CKLF like MARVEL transmembrane domain containing 4 [Source:HGNC Symbol;Acc:HGNC:19175]	16	66614750	66696707	q22.1	-1
ENSG00000198898	8908.86	-0.315	0.108	-2.928	0.00340733	0.03028	down	CAPZA2	capping actin protein of muscle Z-line alpha subunit 2 [Source:HGNC Symbol;Acc:HGNC:1490]	7	116811070	116922049	q31.2	1
ENSG00000137869	330.407	-0.57	0.195	-2.927	0.00342013	0.03033	down	CYP19A1	cytochrome P450 family 19 subfamily A member 1 [Source:HGNC Symbol;Acc:HGNC:2594]	15	51208057	51338610	q21.2	-1
ENSG00000178695	10375.5	-0.342	0.117	-2.922	0.00347264	0.03069	down	KCTD12	potassium channel tetramerization domain containing 12 [Source:HGNC Symbol;Acc:HGNC:14678]	13	76880166	76886390	q22.3	-1
ENSG00000186432	4781.97	-0.315	0.108	-2.922	0.00347566	0.03069	down	KPNA4	karyopherin subunit alpha 4 [Source:HGNC Symbol;Acc:HGNC:6397]	3	160494995	160565588	q25.33	-1
ENSG00000100442	956.666	-0.391	0.134	-2.919	0.00351713	0.03096	down	FKBP3	FK506 binding protein 3 [Source:HGNC Symbol;Acc:HGNC:3719]	14	45115600	45135319	q21.2	-1
ENSG00000164329	4389.64	-0.355	0.122	-2.917	0.00353572	0.03108	down	PAPD4	poly(A) RNA polymerase D4, non-canonical [Source:HGNC Symbol;Acc:HGNC:26776]	5	79612120	79686648	q14.1	1
ENSG00000115414	26781	-0.415	0.142	-2.916	0.00354346	0.03112	down	FN1	fibronectin 1 [Source:HGNC Symbol;Acc:HGNC:3778]	2	215360440	215436172	q35	-1
ENSG00000121989	329.446	-0.542	0.186	-2.915	0.0035599	0.03124	down	ACVR2A	activin A receptor type 2A [Source:HGNC Symbol;Acc:HGNC:173]	2	147844517	147930826	q22.3	1
ENSG00000144136	5849.54	-0.286	0.098	-2.913	0.00357484	0.03134	down	SLC20A1	solute carrier family 20 member 1 [Source:HGNC Symbol;Acc:HGNC:10946]	2	112645857	112663827	q14.1	1
ENSG00000153317	8125.17	-0.25	0.086	-2.911	0.00360799	0.03158	down	ASAP1	ArfGAP with SH3 domain, ankyrin repeat and PH domain 1 [Source:HGNC Symbol;Acc:HGNC:2720]	8	130052104	130443660	q24.22	-1
ENSG00000134243	9090.74	-0.224	0.077	-2.909	0.00362718	0.03172	down	SORT1	sortilin 1 [Source:HGNC Symbol;Acc:HGNC:11186]	1	109309568	109397951	p13.3	-1
ENSG00000162368	5491.25	-0.376	0.129	-2.908	0.00363701	0.03175	down	CMPK1	cytidine/uridine monophosphate kinase 1 [Source:HGNC Symbol;Acc:HGNC:18170]	1	47333797	47378839	p33	1
ENSG00000103540	537.763	-0.465	0.16	-2.906	0.00365809	0.03185	down	CCP110	centriolar coiled-coil protein 110 [Source:HGNC Symbol;Acc:HGNC:24342]	16	19523811	19553408	p12.3	1
ENSG00000173334	1413.84	-0.266	0.091	-2.907	0.00365443	0.03185	down	TRIB1	tribbles pseudokinase 1 [Source:HGNC Symbol;Acc:HGNC:16891]	8	125430321	125438405	q24.13	1
ENSG00000133794	726.36	-0.341	0.117	-2.906	0.00366323	0.03187	down	ARNTL	aryl hydrocarbon receptor nuclear translocator like [Source:HGNC Symbol;Acc:HGNC:701]	11	13276652	13387266	p15.3	1
ENSG00000146376	5704.6	-0.223	0.077	-2.905	0.00367403	0.03194	down	ARHGAP18	Rho GTPase activating protein 18 [Source:HGNC Symbol;Acc:HGNC:21035]	6	129576132	129710225	q22.33	-1
ENSG00000105983	878.072	-0.358	0.123	-2.904	0.0036893	0.03199	down	LMBR1	limb development membrane protein 1 [Source:HGNC Symbol;Acc:HGNC:13243]	7	156668946	156893230	q36.3	-1
ENSG00000169490	1242.97	-0.312	0.108	-2.9	0.00372866	0.03227	down	TM2D2	TM2 domain containing 2 [Source:HGNC Symbol;Acc:HGNC:24127]	8	38988808	38996824	p11.22	-1
ENSG00000147231	184.377	-0.729	0.251	-2.9	0.00373652	0.03231	down	CXorf57	chromosome X open reading frame 57 [Source:HGNC Symbol;Acc:HGNC:25486]	X	106611930	106679442	q22.3	1
ENSG00000187109	14547.7	-0.301	0.104	-2.898	0.00375329	0.0324	down	NAP1L1	nucleosome assembly protein 1 like 1 [Source:HGNC Symbol;Acc:HGNC:7637]	12	76036587	76085033	q21.2	-1
ENSG00000184432	6940.78	-0.179	0.062	-2.898	0.00375061	0.0324	down	COPB2	coatomer protein complex subunit beta 2 [Source:HGNC Symbol;Acc:HGNC:2232]	3	139355600	139389732	q23	-1
ENSG00000229729	185.16	-0.603	0.208	-2.895	0.00378684	0.03266	down
ENSG00000198056	239.275	-0.637	0.22	-2.894	0.00380432	0.03273	down	PRIM1	DNA primase subunit 1 [Source:HGNC Symbol;Acc:HGNC:9369]	12	56731596	56752373	q13.3	-1
ENSG00000163214	764.575	-0.336	0.116	-2.893	0.00381153	0.03277	down	DHX57	DExH-box helicase 57 [Source:HGNC Symbol;Acc:HGNC:20086]	2	38797729	38875934	p22.1	-1
ENSG00000117505	1721.78	-0.306	0.106	-2.892	0.00382577	0.03285	down	DR1	down-regulator of transcription 1 [Source:HGNC Symbol;Acc:HGNC:3017]	1	93345888	93369498	p22.1	1
ENSG00000131269	857.324	-0.307	0.106	-2.891	0.00383869	0.03292	down	ABCB7	ATP binding cassette subfamily B member 7 [Source:HGNC Symbol;Acc:HGNC:48]	X	75051554	75156732	q13.3	-1
ENSG00000182022	1816.36	-0.268	0.093	-2.889	0.00386197	0.033	down	CHST15	carbohydrate sulfotransferase 15 [Source:HGNC Symbol;Acc:HGNC:18137]	10	124007666	124093607	q26.13	-1
ENSG00000171155	1113.93	-0.377	0.131	-2.889	0.00386819	0.03303	down	C1GALT1C1	C1GALT1 specific chaperone 1 [Source:HGNC Symbol;Acc:HGNC:24338]	X	120625793	120630150	q24	-1
ENSG00000163376	2463.74	-0.369	0.128	-2.888	0.00387234	0.03304	down	KBTBD8	kelch repeat and BTB domain containing 8 [Source:HGNC Symbol;Acc:HGNC:30691]	3	66998307	67011210	p14.1	1
ENSG00000147124	354.523	-0.446	0.154	-2.887	0.00389212	0.03318	down	ZNF41	zinc finger protein 41 [Source:HGNC Symbol;Acc:HGNC:13107]	X	47445879	47482946	p11.3	-1
ENSG00000155906	535.955	-0.399	0.138	-2.885	0.00391313	0.03322	down	RMND1	required for meiotic nuclear division 1 homolog [Source:HGNC Symbol;Acc:HGNC:21176]	6	151404762	151452181	q25.1	-1
ENSG00000123636	1616.4	-0.341	0.118	-2.885	0.00391156	0.03322	down	BAZ2B	bromodomain adjacent to zinc finger domain 2B [Source:HGNC Symbol;Acc:HGNC:963]	2	159318979	159616692	q24.2	-1
ENSG00000158615	3040.99	-0.308	0.107	-2.885	0.00390946	0.03322	down	PPP1R15B	protein phosphatase 1 regulatory subunit 15B [Source:HGNC Symbol;Acc:HGNC:14951]	1	204403387	204411791	q32.1	-1
ENSG00000134242	3126.86	-0.363	0.126	-2.884	0.00392732	0.03331	down	PTPN22	protein tyrosine phosphatase, non-receptor type 22 [Source:HGNC Symbol;Acc:HGNC:9652]	1	113813811	113871759	p13.2	-1
ENSG00000161547	2984.61	-0.301	0.104	-2.884	0.00393203	0.03332	down	SRSF2	serine and arginine rich splicing factor 2 [Source:HGNC Symbol;Acc:HGNC:10783]	17	76734115	76737374	q25.1	-1
ENSG00000171988	3127.18	-0.282	0.098	-2.881	0.00396119	0.03351	down	JMJD1C	jumonji domain containing 1C [Source:HGNC Symbol;Acc:HGNC:12313]	10	63167221	63521850	q21.3	-1
ENSG00000009307	21478	-0.205	0.071	-2.88	0.00398139	0.03366	down	CSDE1	cold shock domain containing E1 [Source:HGNC Symbol;Acc:HGNC:29905]	1	114716913	114758676	p13.2	-1
ENSG00000136869	4927.06	-0.279	0.097	-2.877	0.00401386	0.03385	down	TLR4	toll like receptor 4 [Source:HGNC Symbol;Acc:HGNC:11850]	9	117704175	117724730	q33.1	1
ENSG00000104613	1333.77	-0.271	0.094	-2.877	0.00401885	0.03386	down	INTS10	integrator complex subunit 10 [Source:HGNC Symbol;Acc:HGNC:25548]	8	19817140	19852083	p21.3	1
ENSG00000128059	409.747	-0.527	0.183	-2.875	0.00403425	0.03394	down	PPAT	phosphoribosyl pyrophosphate amidotransferase [Source:HGNC Symbol;Acc:HGNC:9238]	4	56393362	56435615	q12	-1
ENSG00000114520	1961.58	-0.288	0.1	-2.875	0.00404049	0.03394	down	SNX4	sorting nexin 4 [Source:HGNC Symbol;Acc:HGNC:11175]	3	125446644	125520197	q21.2	-1
ENSG00000135018	5205.34	-0.257	0.089	-2.875	0.00404226	0.03394	down	UBQLN1	ubiquilin 1 [Source:HGNC Symbol;Acc:HGNC:12508]	9	83659963	83708203	q21.32	-1
ENSG00000113013	14553.6	-0.199	0.069	-2.874	0.00405876	0.03405	down	HSPA9	heat shock protein family A (Hsp70) member 9 [Source:HGNC Symbol;Acc:HGNC:5244]	5	138554882	138575444	q31.2	-1
ENSG00000182220	27791.5	-0.26	0.091	-2.872	0.00407625	0.03417	down	ATP6AP2	ATPase H+ transporting accessory protein 2 [Source:HGNC Symbol;Acc:HGNC:18305]	X	40579372	40606848	p11.4	1
ENSG00000084090	5586.87	-0.23	0.08	-2.871	0.00408776	0.03424	down	STARD7	StAR related lipid transfer domain containing 7 [Source:HGNC Symbol;Acc:HGNC:18063]	2	96184859	96208825	q11.2	-1
ENSG00000100592	423.706	-0.486	0.169	-2.871	0.00409792	0.03427	down	DAAM1	dishevelled associated activator of morphogenesis 1 [Source:HGNC Symbol;Acc:HGNC:18142]	14	59188646	59371405	q23.1	1
ENSG00000163714	3069.02	-0.305	0.106	-2.871	0.00409447	0.03427	down	U2SURP	U2 snRNP associated SURP domain containing [Source:HGNC Symbol;Acc:HGNC:30855]	3	142964497	143060546	q23	1
ENSG00000138640	350.785	-0.583	0.203	-2.869	0.00412377	0.03443	down	FAM13A	family with sequence similarity 13 member A [Source:HGNC Symbol;Acc:HGNC:19367]	4	88725955	89111398	q22.1	-1
ENSG00000078747	3551.87	-0.263	0.092	-2.866	0.00415934	0.0347	down	ITCH	itchy E3 ubiquitin protein ligase [Source:HGNC Symbol;Acc:HGNC:13890]	20	34363235	34511393	q11.22	1
ENSG00000171490	3502.43	-0.266	0.093	-2.864	0.00418012	0.03484	down	RSL1D1	ribosomal L1 domain containing 1 [Source:HGNC Symbol;Acc:HGNC:24534]	16	11833850	11851585	p13.13	-1
ENSG00000164941	1208.72	-0.316	0.11	-2.86	0.00423365	0.03512	down	INTS8	integrator complex subunit 8 [Source:HGNC Symbol;Acc:HGNC:26048]	8	94813311	94881746	q22.1	1
ENSG00000008394	7040.07	-0.285	0.1	-2.855	0.00430475	0.03562	down	MGST1	microsomal glutathione S-transferase 1 [Source:HGNC Symbol;Acc:HGNC:7061]	12	16347142	16609259	p12.3	1
ENSG00000163170	339.28	-0.496	0.174	-2.853	0.00432679	0.03574	down	BOLA3	bolA family member 3 [Source:HGNC Symbol;Acc:HGNC:24415]	2	74135398	74147994	p13.1	-1
ENSG00000112339	1655.76	-0.311	0.109	-2.852	0.0043475	0.03583	down	HBS1L	HBS1 like translational GTPase [Source:HGNC Symbol;Acc:HGNC:4834]	6	134960378	135103056	q23.3	-1
ENSG00000144118	5319.85	-0.227	0.08	-2.852	0.0043409	0.03583	down	RALB	RAS like proto-oncogene B [Source:HGNC Symbol;Acc:HGNC:9840]	2	120240064	120294713	q14.2	1
ENSG00000100084	90.455	-0.829	0.291	-2.85	0.00437788	0.03602	down	HIRA	histone cell cycle regulator [Source:HGNC Symbol;Acc:HGNC:4916]	22	19330698	19447450	q11.21	-1
ENSG00000145349	1305.37	-0.349	0.122	-2.849	0.00438146	0.03602	down	CAMK2D	calcium/calmodulin dependent protein kinase II delta [Source:HGNC Symbol;Acc:HGNC:1462]	4	113451032	113761927	q26	-1
ENSG00000196247	310.256	-0.549	0.193	-2.848	0.00439344	0.03609	down	ZNF107	zinc finger protein 107 [Source:HGNC Symbol;Acc:HGNC:12887]	7	64666083	64711582	q11.21	1
ENSG00000163660	5520.06	-0.261	0.092	-2.845	0.00443553	0.03637	down	CCNL1	cyclin L1 [Source:HGNC Symbol;Acc:HGNC:20569]	3	157146508	157160760	q25.31	-1
ENSG00000139350	866.411	-0.421	0.148	-2.845	0.00444002	0.03638	down	NEDD1	neural precursor cell expressed, developmentally down-regulated 1 [Source:HGNC Symbol;Acc:HGNC:7723]	12	96907223	96953777	q23.1	1
ENSG00000117133	885.728	-0.35	0.123	-2.844	0.00445498	0.03646	down	RPF1	ribosome production factor 1 homolog [Source:HGNC Symbol;Acc:HGNC:30350]	1	84479259	84497790	p22.3	1
ENSG00000136381	3721.47	-0.332	0.117	-2.844	0.00445702	0.03646	down	IREB2	iron responsive element binding protein 2 [Source:HGNC Symbol;Acc:HGNC:6115]	15	78437431	78501456	q25.1	1
ENSG00000138821	7346.7	-0.412	0.145	-2.841	0.00449464	0.03669	down	SLC39A8	solute carrier family 39 member 8 [Source:HGNC Symbol;Acc:HGNC:20862]	4	102251041	102431258	q24	-1
ENSG00000179295	4752.25	-0.22	0.077	-2.841	0.00449544	0.03669	down	PTPN11	protein tyrosine phosphatase, non-receptor type 11 [Source:HGNC Symbol;Acc:HGNC:9644]	12	112418351	112509913	q24.13	1
ENSG00000134970	3891.12	-0.414	0.146	-2.84	0.00450964	0.03677	down	TMED7	transmembrane p24 trafficking protein 7 [Source:HGNC Symbol;Acc:HGNC:24253]	5	115613508	115632992	q22.3	-1
ENSG00000129315	1297.85	-0.319	0.112	-2.838	0.0045407	0.037	down	CCNT1	cyclin T1 [Source:HGNC Symbol;Acc:HGNC:1599]	12	48688458	48716998	q13.12	-1
ENSG00000115514	1139.21	-0.357	0.126	-2.835	0.00457802	0.03721	down	TXNDC9	thioredoxin domain containing 9 [Source:HGNC Symbol;Acc:HGNC:24110]	2	99318982	99340702	q11.2	-1
ENSG00000197563	1806.76	-0.27	0.095	-2.835	0.00457777	0.03721	down	PIGN	phosphatidylinositol glycan anchor biosynthesis class N [Source:HGNC Symbol;Acc:HGNC:8967]	18	61905255	62187118	q21.33	-1
ENSG00000111711	2492.53	-0.4	0.141	-2.833	0.00460728	0.03733	down	GOLT1B	golgi transport 1B [Source:HGNC Symbol;Acc:HGNC:20175]	12	21501781	21518408	p12.1	1
ENSG00000144909	5338.06	-0.255	0.09	-2.834	0.0046034	0.03733	down	OSBPL11	oxysterol binding protein like 11 [Source:HGNC Symbol;Acc:HGNC:16397]	3	125528858	125595090	q21.2	-1
ENSG00000154429	2290.66	-0.292	0.103	-2.833	0.00461203	0.03734	down	CCSAP	centriole, cilia and spindle associated protein [Source:HGNC Symbol;Acc:HGNC:29578]	1	229321005	229343294	q42.13	-1
ENSG00000242779	206.202	-0.672	0.237	-2.832	0.00462635	0.03739	down	ZNF702P	zinc finger protein 702, pseudogene [Source:HGNC Symbol;Acc:HGNC:25775]	19	52968251	53037898	q13.41	-1
ENSG00000136111	1216.23	-0.345	0.122	-2.831	0.00463561	0.03743	down	TBC1D4	TBC1 domain family member 4 [Source:HGNC Symbol;Acc:HGNC:19165]	13	75284665	75482114	q22.2	-1
ENSG00000164346	1432.92	-0.294	0.104	-2.83	0.00465119	0.03751	down	NSA2	NSA2, ribosome biogenesis homolog [Source:HGNC Symbol;Acc:HGNC:30728]	5	74766991	74780113	q13.3	1
ENSG00000104381	337.081	-0.48	0.17	-2.83	0.00465862	0.03754	down	GDAP1	ganglioside induced differentiation associated protein 1 [Source:HGNC Symbol;Acc:HGNC:15968]	8	74321130	74488872	q21.11	1
ENSG00000169245	203.816	-1.615	0.571	-2.827	0.00470428	0.03775	down	CXCL10	C-X-C motif chemokine ligand 10 [Source:HGNC Symbol;Acc:HGNC:10637]	4	76021117	76023497	q21.1	-1
ENSG00000174371	186.221	-0.839	0.297	-2.825	0.00472633	0.03785	down	EXO1	exonuclease 1 [Source:HGNC Symbol;Acc:HGNC:3511]	1	241847967	241895148	q43	1
ENSG00000050393	825.297	-0.365	0.129	-2.825	0.00473265	0.03786	down	MCUR1	mitochondrial calcium uniporter regulator 1 [Source:HGNC Symbol;Acc:HGNC:21097]	6	13786557	13814568	p23	-1
ENSG00000144827	1486.45	-0.335	0.119	-2.822	0.00476938	0.03805	down	ABHD10	abhydrolase domain containing 10 [Source:HGNC Symbol;Acc:HGNC:25656]	3	111979010	111993363	q13.2	1
ENSG00000109046	5333.67	-0.273	0.097	-2.822	0.00477174	0.03805	down	WSB1	WD repeat and SOCS box containing 1 [Source:HGNC Symbol;Acc:HGNC:19221]	17	27294076	27315926	q11.1	1
ENSG00000170348	9111.01	-0.251	0.089	-2.822	0.00476963	0.03805	down	TMED10	transmembrane p24 trafficking protein 10 [Source:HGNC Symbol;Acc:HGNC:16998]	14	75131470	75176631	q24.3	-1
ENSG00000088035	378.141	-0.452	0.16	-2.82	0.00480041	0.03819	down	ALG6	ALG6, alpha-1,3-glucosyltransferase [Source:HGNC Symbol;Acc:HGNC:23157]	1	63367590	63438562	p31.3	1
ENSG00000189403	3647.09	-0.288	0.102	-2.816	0.00485707	0.03852	down	HMGB1	high mobility group box 1 [Source:HGNC Symbol;Acc:HGNC:4983]	13	30456704	30617597	q12.3	-1
ENSG00000156467	5477.05	-0.267	0.095	-2.814	0.00489365	0.03872	down	UQCRB	ubiquinol-cytochrome c reductase binding protein [Source:HGNC Symbol;Acc:HGNC:12582]	8	96225920	96235634	q22.1	-1
ENSG00000107758	1809.19	-0.352	0.125	-2.811	0.00494345	0.03905	down	PPP3CB	protein phosphatase 3 catalytic subunit beta [Source:HGNC Symbol;Acc:HGNC:9315]	10	73436428	73496024	q22.2	-1
ENSG00000135090	3778.45	-0.2	0.071	-2.807	0.00499887	0.03937	down	TAOK3	TAO kinase 3 [Source:HGNC Symbol;Acc:HGNC:18133]	12	118149801	118372945	q24.23	-1
ENSG00000111647	2687.83	-0.321	0.114	-2.807	0.00500538	0.03939	down	UHRF1BP1L	UHRF1 binding protein 1 like [Source:HGNC Symbol;Acc:HGNC:29102]	12	100028455	100142848	q23.1	-1
ENSG00000139921	3159.14	-0.337	0.12	-2.806	0.00501126	0.0394	down	TMX1	thioredoxin related transmembrane protein 1 [Source:HGNC Symbol;Acc:HGNC:15487]	14	51240162	51257546	q22.1	1
ENSG00000115310	16938.1	-0.24	0.085	-2.806	0.00501483	0.0394	down	RTN4	reticulon 4 [Source:HGNC Symbol;Acc:HGNC:14085]	2	54972187	55112621	p16.1	-1
ENSG00000185745	8424.99	-0.827	0.295	-2.805	0.00503584	0.03946	down	IFIT1	interferon induced protein with tetratricopeptide repeats 1 [Source:HGNC Symbol;Acc:HGNC:5407]	10	89392546	89406486	q23.31	1
ENSG00000116668	393.386	-0.525	0.187	-2.804	0.00504513	0.03946	down	SWT1	SWT1, RNA endoribonuclease homolog [Source:HGNC Symbol;Acc:HGNC:16785]	1	185157080	185291765	q25.3	1
ENSG00000101935	396.225	-0.468	0.167	-2.804	0.00504091	0.03946	down	AMMECR1	Alport syndrome, mental retardation, midface hypoplasia and elliptocytosis chromosomal region gene 1 [Source:HGNC Symbol;Acc:HGNC:467]	X	110194186	110440233	q23	-1
ENSG00000151806	1617.02	-0.344	0.123	-2.804	0.00504161	0.03946	down	GUF1	GUF1 homolog, GTPase [Source:HGNC Symbol;Acc:HGNC:25799]	4	44678427	44700926	p12	1
ENSG00000170571	749.85	-0.403	0.144	-2.802	0.00508425	0.03967	down	EMB	embigin [Source:HGNC Symbol;Acc:HGNC:30465]	5	50396192	50443248	q11.1	-1
ENSG00000133731	1262.23	-0.327	0.117	-2.802	0.00508435	0.03967	down	IMPA1	inositol monophosphatase 1 [Source:HGNC Symbol;Acc:HGNC:6050]	8	81657961	81686693	q21.13	-1
ENSG00000180233	593.385	-0.458	0.164	-2.801	0.00510084	0.03977	down	ZNRF2	zinc and ring finger 2 [Source:HGNC Symbol;Acc:HGNC:22316]	7	30284307	30367692	p14.3	1
ENSG00000237973	1876.92	-0.339	0.121	-2.8	0.00511414	0.03984	down	MTCO1P12	mitochondrially encoded cytochrome c oxidase I pseudogene 12 [Source:HGNC Symbol;Acc:HGNC:52014]	1	631074	632616	p36.33	1
ENSG00000196504	4507.88	-0.331	0.118	-2.798	0.00513636	0.03995	down	PRPF40A	pre-mRNA processing factor 40 homolog A [Source:HGNC Symbol;Acc:HGNC:16463]	2	152651593	152717997	q23.3	-1
ENSG00000168769	2089.94	-0.286	0.102	-2.798	0.00513469	0.03995	down	TET2	tet methylcytosine dioxygenase 2 [Source:HGNC Symbol;Acc:HGNC:25941]	4	105145875	105279816	q24	1
ENSG00000271882	97.061	-1.005	0.359	-2.797	0.00515561	0.03999	down			8	101208148	101208558	q22.3	1
ENSG00000083642	950.119	-0.341	0.122	-2.797	0.00515648	0.03999	down	PDS5B	PDS5 cohesin associated factor B [Source:HGNC Symbol;Acc:HGNC:20418]	13	32586427	32778019	q13.1	1
ENSG00000221823	1013.57	-0.312	0.112	-2.796	0.00517569	0.04011	down	PPP3R1	protein phosphatase 3 regulatory subunit B, alpha [Source:HGNC Symbol;Acc:HGNC:9317]	2	68178857	68256237	p14	-1
ENSG00000120705	5228.45	-0.238	0.085	-2.792	0.0052359	0.04045	down	ETF1	eukaryotic translation termination factor 1 [Source:HGNC Symbol;Acc:HGNC:3477]	5	138506095	138543300	q31.2	-1
ENSG00000081014	1941.22	-0.342	0.122	-2.792	0.00524591	0.0405	down	AP4E1	adaptor related protein complex 4 epsilon 1 subunit [Source:HGNC Symbol;Acc:HGNC:573]	15	50908672	51005900	q21.2	1
ENSG00000166797	4056.84	-0.278	0.1	-2.79	0.00527289	0.04052	down	FAM96A	family with sequence similarity 96 member A [Source:HGNC Symbol;Acc:HGNC:26235]	15	64072559	64094018	q22.31	-1
ENSG00000138678	4813.87	-0.266	0.095	-2.79	0.00526741	0.04052	down	GPAT3	glycerol-3-phosphate acyltransferase 3 [Source:HGNC Symbol;Acc:HGNC:28157]	4	83535914	83605875	q21.23	1
ENSG00000089048	1196.6	-0.432	0.155	-2.789	0.00527935	0.04054	down	ESF1	ESF1 nucleolar pre-rRNA processing protein homolog [Source:HGNC Symbol;Acc:HGNC:15898]	20	13714322	13784886	p12.1	-1
ENSG00000165476	2701.03	-0.289	0.104	-2.789	0.00528533	0.04055	down	REEP3	receptor accessory protein 3 [Source:HGNC Symbol;Acc:HGNC:23711]	10	63521363	63625123	q21.3	1
ENSG00000023041	1247.67	-0.278	0.1	-2.789	0.00528825	0.04055	down	ZDHHC6	zinc finger DHHC-type containing 6 [Source:HGNC Symbol;Acc:HGNC:19160]	10	112424428	112446917	q25.2	-1
ENSG00000121690	138.713	-0.841	0.302	-2.789	0.00529369	0.04056	down	DEPDC7	DEP domain containing 7 [Source:HGNC Symbol;Acc:HGNC:29899]	11	33015864	33033582	p13	1
ENSG00000122435	340.59	-0.504	0.181	-2.787	0.00531531	0.04069	down	TRMT13	tRNA methyltransferase 13 homolog [Source:HGNC Symbol;Acc:HGNC:25502]	1	100133150	100150497	p21.2	1
ENSG00000172292	1332.85	-0.319	0.114	-2.787	0.00531843	0.04069	down	CERS6	ceramide synthase 6 [Source:HGNC Symbol;Acc:HGNC:23826]	2	168455862	168775137	q24.3	1
ENSG00000080986	342.441	-0.792	0.284	-2.786	0.00533741	0.04077	down	NDC80	NDC80, kinetochore complex component [Source:HGNC Symbol;Acc:HGNC:16909]	18	2571511	2616635	p11.32	1
ENSG00000169021	2449.04	-0.251	0.09	-2.786	0.00534207	0.04077	down	UQCRFS1	ubiquinol-cytochrome c reductase, Rieske iron-sulfur polypeptide 1 [Source:HGNC Symbol;Acc:HGNC:12587]	19	29205321	29213541	q12	-1
ENSG00000165156	2046.53	-0.315	0.113	-2.785	0.00535056	0.04078	down	ZHX1	zinc fingers and homeoboxes 1 [Source:HGNC Symbol;Acc:HGNC:12871]	8	123248451	123275541	q24.13	-1
ENSG00000173598	553.305	-0.428	0.154	-2.784	0.00537567	0.04088	down	NUDT4	nudix hydrolase 4 [Source:HGNC Symbol;Acc:HGNC:8051]	12	93377883	93408146	q22	1
ENSG00000080819	929.664	-0.365	0.131	-2.784	0.00537307	0.04088	down	CPOX	coproporphyrinogen oxidase [Source:HGNC Symbol;Acc:HGNC:2321]	3	98521132	98593723	q11.2	-1
ENSG00000065833	2934.36	-0.255	0.092	-2.783	0.00538428	0.04091	down	ME1	malic enzyme 1 [Source:HGNC Symbol;Acc:HGNC:6983]	6	83210389	83431071	q14.2	-1
ENSG00000169288	637.361	-0.435	0.156	-2.782	0.0053998	0.041	down	MRPL1	mitochondrial ribosomal protein L1 [Source:HGNC Symbol;Acc:HGNC:14275]	4	77862520	77952790	q21.1	1
ENSG00000122257	1953.16	-0.358	0.129	-2.78	0.0054368	0.0411	down	RBBP6	RB binding protein 6, ubiquitin ligase [Source:HGNC Symbol;Acc:HGNC:9889]	16	24537693	24572863	p12.1	1
ENSG00000050130	2659.01	-0.283	0.102	-2.78	0.00542766	0.0411	down	JKAMP	JNK1/MAPK8 associated membrane protein [Source:HGNC Symbol;Acc:HGNC:20184]	14	59484443	59505410	q23.1	1
ENSG00000106080	314.818	-0.524	0.189	-2.778	0.00547145	0.04131	down	FKBP14	FK506 binding protein 14 [Source:HGNC Symbol;Acc:HGNC:18625]	7	30010587	30026684	p14.3	-1
ENSG00000137845	9786.81	-0.248	0.089	-2.776	0.00550616	0.04149	down	ADAM10	ADAM metallopeptidase domain 10 [Source:HGNC Symbol;Acc:HGNC:188]	15	58588807	58749978	q21.3	-1
ENSG00000135521	897.398	-0.42	0.151	-2.775	0.00552221	0.0415	down	LTV1	LTV1 ribosome biogenesis factor [Source:HGNC Symbol;Acc:HGNC:21173]	6	143843344	143863812	q24.2	1
ENSG00000112996	1105.51	-0.397	0.143	-2.775	0.00551959	0.0415	down	MRPS30	mitochondrial ribosomal protein S30 [Source:HGNC Symbol;Acc:HGNC:8769]	5	44808925	44820428	p12	1
ENSG00000148153	1085.35	-0.286	0.103	-2.773	0.00554701	0.04165	down	INIP	INTS3 and NABP interacting protein [Source:HGNC Symbol;Acc:HGNC:24994]	9	112683926	112718236	q32	-1
ENSG00000179021	1426.36	-0.354	0.128	-2.773	0.00555763	0.0417	down	C3orf38	chromosome 3 open reading frame 38 [Source:HGNC Symbol;Acc:HGNC:28384]	3	88149743	88168729	p11.1	1
ENSG00000136436	2447.13	-0.227	0.082	-2.772	0.00557918	0.04183	down	CALCOCO2	calcium binding and coiled-coil domain 2 [Source:HGNC Symbol;Acc:HGNC:29912]	17	48830988	48866522	q21.32	1
ENSG00000084093	2100.41	-0.307	0.111	-2.771	0.00559217	0.0419	down	REST	RE1 silencing transcription factor [Source:HGNC Symbol;Acc:HGNC:9966]	4	56907876	56966678	q12	1
ENSG00000087095	826.944	-0.333	0.12	-2.769	0.00561914	0.04207	down	NLK	nemo like kinase [Source:HGNC Symbol;Acc:HGNC:29858]	17	28041737	28196381	q11.2	1
ENSG00000156876	231.499	-0.598	0.216	-2.768	0.00564149	0.04215	down	SASS6	SAS-6 centriolar assembly protein [Source:HGNC Symbol;Acc:HGNC:25403]	1	100083563	100132955	p21.2	-1
ENSG00000134375	3049.31	-0.302	0.109	-2.766	0.00566693	0.0423	down	TIMM17A	translocase of inner mitochondrial membrane 17A [Source:HGNC Symbol;Acc:HGNC:17315]	1	201955491	201970661	q32.1	1
ENSG00000104626	933.324	-0.394	0.143	-2.763	0.00573297	0.04268	down	ERI1	exoribonuclease 1 [Source:HGNC Symbol;Acc:HGNC:23994]	8	9002147	9116746	p23.1	1
ENSG00000184983	1014.03	-0.268	0.097	-2.762	0.00574343	0.04268	down	NDUFA6	NADH:ubiquinone oxidoreductase subunit A6 [Source:HGNC Symbol;Acc:HGNC:7690]	22	42085525	42090955	q13.2	-1
ENSG00000038274	3237.68	-0.258	0.093	-2.762	0.00573889	0.04268	down	MAT2B	methionine adenosyltransferase 2B [Source:HGNC Symbol;Acc:HGNC:6905]	5	163503114	163519336	q34	1
ENSG00000152332	9101.55	-0.32	0.116	-2.759	0.00579583	0.04286	down	UHMK1	U2AF homology motif kinase 1 [Source:HGNC Symbol;Acc:HGNC:19683]	1	162497251	162529629	q23.3	1
ENSG00000131174	2670.66	-0.241	0.087	-2.759	0.00579732	0.04286	down	COX7B	cytochrome c oxidase subunit 7B [Source:HGNC Symbol;Acc:HGNC:2291]	X	77899438	77907373	q21.1	1
ENSG00000164342	308.015	-0.598	0.217	-2.757	0.00584023	0.04312	down	TLR3	toll like receptor 3 [Source:HGNC Symbol;Acc:HGNC:11849]	4	186069152	186088069	q35.1	1
ENSG00000101367	4564.68	-0.2	0.072	-2.754	0.00588471	0.04332	down	MAPRE1	microtubule associated protein RP/EB family member 1 [Source:HGNC Symbol;Acc:HGNC:6890]	20	32819893	32850405	q11.21	1
ENSG00000163823	5104.79	-0.197	0.072	-2.754	0.00587983	0.04332	down	CCR1	C-C motif chemokine receptor 1 [Source:HGNC Symbol;Acc:HGNC:1602]	3	46201709	46208396	p21.31	-1
ENSG00000137812	599.321	-0.642	0.233	-2.753	0.00590398	0.04343	down	KNL1	kinetochore scaffold 1 [Source:HGNC Symbol;Acc:HGNC:24054]	15	40594020	40664342	q15.1	1
ENSG00000172239	1211.2	-0.306	0.111	-2.752	0.00592129	0.04349	down	PAIP1	poly(A) binding protein interacting protein 1 [Source:HGNC Symbol;Acc:HGNC:16945]	5	43526267	43557758	p12	-1
ENSG00000198015	983.357	-0.364	0.132	-2.75	0.00595124	0.04365	down	MRPL42	mitochondrial ribosomal protein L42 [Source:HGNC Symbol;Acc:HGNC:14493]	12	93467488	93516213	q22	1
ENSG00000087263	838.642	-0.34	0.124	-2.749	0.00598058	0.04383	down	OGFOD1	2-oxoglutarate and iron dependent oxygenase domain containing 1 [Source:HGNC Symbol;Acc:HGNC:25585]	16	56451490	56479100	q13	1
ENSG00000186063	764.037	-0.319	0.116	-2.748	0.00599231	0.04385	down	AIDA	axin interactor, dorsalization associated [Source:HGNC Symbol;Acc:HGNC:25761]	1	222668013	222713210	q41	-1
ENSG00000095139	6309.79	-0.223	0.081	-2.748	0.00599405	0.04385	down	ARCN1	archain 1 [Source:HGNC Symbol;Acc:HGNC:649]	11	118572390	118603033	q23.3	1
ENSG00000119185	4075.64	-0.223	0.081	-2.746	0.00603267	0.04409	down	ITGB1BP1	integrin subunit beta 1 binding protein 1 [Source:HGNC Symbol;Acc:HGNC:23927]	2	9403475	9423547	p25.1	-1
ENSG00000120686	3200.47	-0.331	0.12	-2.746	0.00603894	0.0441	down	UFM1	ubiquitin fold modifier 1 [Source:HGNC Symbol;Acc:HGNC:20597]	13	38349849	38363619	q13.3	1
ENSG00000173145	611.475	-0.411	0.15	-2.743	0.00609434	0.04448	down	NOC3L	NOC3 like DNA replication regulator [Source:HGNC Symbol;Acc:HGNC:24034]	10	94333226	94362959	q23.33	-1
ENSG00000131981	17695.7	-0.283	0.103	-2.741	0.00611802	0.04459	down	LGALS3	galectin 3 [Source:HGNC Symbol;Acc:HGNC:6563]	14	55124110	55145413	q22.3	1
ENSG00000187164	8093.93	-0.254	0.093	-2.741	0.00613004	0.04459	down	SHTN1	shootin 1 [Source:HGNC Symbol;Acc:HGNC:29319]	10	116881482	117126586	q25.3	-1
ENSG00000160124	233.082	-0.521	0.19	-2.739	0.00616271	0.04475	down	CCDC58	coiled-coil domain containing 58 [Source:HGNC Symbol;Acc:HGNC:31136]	3	122359591	122383231	q21.1	-1
ENSG00000164949	510.945	-0.53	0.194	-2.737	0.00619885	0.04498	down	GEM	GTP binding protein overexpressed in skeletal muscle [Source:HGNC Symbol;Acc:HGNC:4234]	8	94249253	94262350	q22.1	-1
ENSG00000166012	1307.01	-0.38	0.139	-2.736	0.00621951	0.04501	down	TAF1D	TATA-box binding protein associated factor, RNA polymerase I subunit D [Source:HGNC Symbol;Acc:HGNC:28759]	11	93729948	93784391	q21	-1
ENSG00000067248	1881.72	-0.359	0.131	-2.736	0.00622478	0.04501	down	DHX29	DExH-box helicase 29 [Source:HGNC Symbol;Acc:HGNC:15815]	5	55256245	55307722	q11.2	-1
ENSG00000145734	2220.97	-0.332	0.121	-2.737	0.00620917	0.04501	down	BDP1	B double prime 1, subunit of RNA polymerase III transcription initiation factor IIIB [Source:HGNC Symbol;Acc:HGNC:13652]	5	71455615	71567820	q13.2	1
ENSG00000117143	673.816	-0.321	0.117	-2.736	0.00622358	0.04501	down	UAP1	UDP-N-acetylglucosamine pyrophosphorylase 1 [Source:HGNC Symbol;Acc:HGNC:12457]	1	162561506	162599842	q23.3	1
ENSG00000173276	1036.63	-0.409	0.15	-2.735	0.00624031	0.04504	down	ZBTB21	zinc finger and BTB domain containing 21 [Source:HGNC Symbol;Acc:HGNC:13083]	21	41986831	42010387	q22.3	-1
ENSG00000143158	2458.61	-0.325	0.119	-2.735	0.00624236	0.04504	down	MPC2	mitochondrial pyruvate carrier 2 [Source:HGNC Symbol;Acc:HGNC:24515]	1	167916729	167937040	q24.2	-1
ENSG00000151694	1416.94	-0.281	0.103	-2.735	0.00624034	0.04504	down	ADAM17	ADAM metallopeptidase domain 17 [Source:HGNC Symbol;Acc:HGNC:195]	2	9488486	9555792	p25.1	-1
ENSG00000122482	1463.66	-0.364	0.133	-2.734	0.00626383	0.04516	down	ZNF644	zinc finger protein 644 [Source:HGNC Symbol;Acc:HGNC:29222]	1	90915298	91022272	p22.2	-1
ENSG00000137673	38353.1	-0.346	0.127	-2.732	0.00629395	0.04535	down	MMP7	matrix metallopeptidase 7 [Source:HGNC Symbol;Acc:HGNC:7174]	11	102520508	102530753	q22.2	-1
ENSG00000138376	361.839	-0.492	0.18	-2.727	0.00638348	0.04582	down	BARD1	BRCA1 associated RING domain 1 [Source:HGNC Symbol;Acc:HGNC:952]	2	214725646	214809711	q35	-1
ENSG00000171862	1863.26	-0.362	0.133	-2.728	0.00638143	0.04582	down	PTEN	phosphatase and tensin homolog [Source:HGNC Symbol;Acc:HGNC:9588]	10	87863113	87971930	q23.31	1
ENSG00000114062	2804.91	-0.336	0.123	-2.728	0.00637432	0.04582	down	UBE3A	ubiquitin protein ligase E3A [Source:HGNC Symbol;Acc:HGNC:12496]	15	25333728	25439056	q11.2	-1
ENSG00000265972	5125.17	-0.324	0.119	-2.727	0.00638698	0.04582	down	TXNIP	thioredoxin interacting protein [Source:HGNC Symbol;Acc:HGNC:16952]	1	145992435	145996600	q21.1	-1
ENSG00000082898	7678.24	-0.308	0.113	-2.726	0.00640402	0.04591	down	XPO1	exportin 1 [Source:HGNC Symbol;Acc:HGNC:12825]	2	61477849	61538626	p15	-1
ENSG00000092108	2803.15	-0.307	0.113	-2.726	0.00641613	0.04596	down	SCFD1	sec1 family domain containing 1 [Source:HGNC Symbol;Acc:HGNC:20726]	14	30622112	30735812	q12	1
ENSG00000196591	2904.21	-0.278	0.102	-2.725	0.00643504	0.04603	down	HDAC2	histone deacetylase 2 [Source:HGNC Symbol;Acc:HGNC:4853]	6	113933028	114011308	q21	-1
ENSG00000155189	577.309	-0.421	0.155	-2.724	0.0064508	0.04608	down	AGPAT5	1-acylglycerol-3-phosphate O-acyltransferase 5 [Source:HGNC Symbol;Acc:HGNC:20886]	8	6708357	6759666	p23.1	1
ENSG00000136521	2805.25	-0.311	0.114	-2.724	0.00644781	0.04608	down	NDUFB5	NADH:ubiquinone oxidoreductase subunit B5 [Source:HGNC Symbol;Acc:HGNC:7700]	3	179604690	179627647	q26.33	1
ENSG00000272888	577.948	-0.439	0.161	-2.722	0.00648455	0.04623	down	LINC01578	long intergenic non-protein coding RNA 1578 [Source:HGNC Symbol;Acc:HGNC:48626]	15	92882707	92899701	q26.1	1
ENSG00000170606	9091.21	-0.251	0.092	-2.721	0.00651628	0.04642	down	HSPA4	heat shock protein family A (Hsp70) member 4 [Source:HGNC Symbol;Acc:HGNC:5237]	5	133051962	133106449	q31.1	1
ENSG00000253123	188.201	-0.677	0.249	-2.718	0.0065696	0.04672	down			8	37326575	37331984	p11.23	-1
ENSG00000196639	362.337	-0.49	0.18	-2.716	0.00661435	0.04686	down	HRH1	histamine receptor H1 [Source:HGNC Symbol;Acc:HGNC:5182]	3	11137093	11263557	p25.3	1
ENSG00000163624	525.576	-0.401	0.148	-2.716	0.00661564	0.04686	down	CDS1	CDP-diacylglycerol synthase 1 [Source:HGNC Symbol;Acc:HGNC:1800]	4	84582979	84651338	q21.23	1
ENSG00000153250	5492.75	-0.272	0.1	-2.714	0.00664977	0.04697	down	RBMS1	RNA binding motif single stranded interacting protein 1 [Source:HGNC Symbol;Acc:HGNC:9907]	2	160272151	160493794	q24.2	-1
ENSG00000104064	685.064	-0.359	0.132	-2.713	0.00667569	0.04709	down	GABPB1	GA binding protein transcription factor beta subunit 1 [Source:HGNC Symbol;Acc:HGNC:4074]	15	50275392	50355408	q21.2	-1
ENSG00000132388	1580.83	-0.321	0.118	-2.711	0.00671313	0.04713	down	UBE2G1	ubiquitin conjugating enzyme E2 G1 [Source:HGNC Symbol;Acc:HGNC:12482]	17	4269259	4366628	p13.2	-1
ENSG00000145725	6356.19	-0.313	0.116	-2.712	0.00669599	0.04713	down	PPIP5K2	diphosphoinositol pentakisphosphate kinase 2 [Source:HGNC Symbol;Acc:HGNC:29035]	5	103120149	103212799	q21.1	1
ENSG00000107771	1844.44	-0.282	0.104	-2.712	0.00669122	0.04713	down	CCSER2	coiled-coil serine rich protein 2 [Source:HGNC Symbol;Acc:HGNC:29197]	10	84328558	84518521	q23.1	1
ENSG00000136631	1511.22	-0.264	0.097	-2.71	0.00673189	0.04716	down	VPS45	vacuolar protein sorting 45 homolog [Source:HGNC Symbol;Acc:HGNC:14579]	1	150067279	150145329	q21.2	1
ENSG00000110700	3248.39	-0.246	0.091	-2.709	0.00675568	0.04726	down	RPS13	ribosomal protein S13 [Source:HGNC Symbol;Acc:HGNC:10386]	11	17074389	17077787	p15.1	-1
ENSG00000124383	1081.06	-0.345	0.127	-2.707	0.00678743	0.04738	down	MPHOSPH10	M-phase phosphoprotein 10 [Source:HGNC Symbol;Acc:HGNC:7213]	2	71130314	71150101	p13.3	1
ENSG00000138061	33923	-0.338	0.125	-2.707	0.00678699	0.04738	down	CYP1B1	cytochrome P450 family 1 subfamily B member 1 [Source:HGNC Symbol;Acc:HGNC:2597]	2	38066973	38109902	p22.2	-1
ENSG00000196141	925.28	-0.311	0.115	-2.707	0.00679609	0.04738	down	SPATS2L	spermatogenesis associated serine rich 2 like [Source:HGNC Symbol;Acc:HGNC:24574]	2	200305881	200482263	q33.1	1
ENSG00000107290	4960.45	-0.265	0.098	-2.706	0.00680117	0.04738	down	SETX	senataxin [Source:HGNC Symbol;Acc:HGNC:445]	9	132261356	132354985	q34.13	-1
ENSG00000197498	929.795	-0.33	0.122	-2.703	0.0068622	0.04774	down	RPF2	ribosome production factor 2 homolog [Source:HGNC Symbol;Acc:HGNC:20870]	6	110982015	111028263	q21	1
ENSG00000120280	650.179	-0.327	0.121	-2.703	0.00686635	0.04774	down	CXorf21	chromosome X open reading frame 21 [Source:HGNC Symbol;Acc:HGNC:25667]	X	30558824	30577844	p21.2	-1
ENSG00000118200	2226.77	-0.317	0.117	-2.702	0.00689015	0.04787	down	CAMSAP2	calmodulin regulated spectrin associated protein family member 2 [Source:HGNC Symbol;Acc:HGNC:29188]	1	200739558	200860704	q32.1	1
ENSG00000078140	2593.39	-0.284	0.105	-2.701	0.00691082	0.04798	down	UBE2K	ubiquitin conjugating enzyme E2 K [Source:HGNC Symbol;Acc:HGNC:4914]	4	39698044	39782792	p14	1
ENSG00000173852	944.239	-0.377	0.14	-2.699	0.0069488	0.04819	down	DPY19L1	dpy-19 like C-mannosyltransferase 1 [Source:HGNC Symbol;Acc:HGNC:22205]	7	34928876	35038271	p14.2	-1
ENSG00000138668	2610.47	-0.25	0.093	-2.699	0.00695458	0.04819	down	HNRNPD	heterogeneous nuclear ribonucleoprotein D [Source:HGNC Symbol;Acc:HGNC:5036]	4	82352498	82374503	q21.22	-1
ENSG00000176208	240.144	-0.706	0.262	-2.697	0.00699085	0.04835	down	ATAD5	ATPase family, AAA domain containing 5 [Source:HGNC Symbol;Acc:HGNC:25752]	17	30831970	30895869	q11.2	1
ENSG00000213047	2296.09	-0.355	0.132	-2.697	0.00699663	0.04835	down	DENND1B	DENN domain containing 1B [Source:HGNC Symbol;Acc:HGNC:28404]	1	197504748	197775696	q31.3	-1
ENSG00000120800	782.674	-0.347	0.129	-2.697	0.00700239	0.04835	down	UTP20	UTP20, small subunit processome component [Source:HGNC Symbol;Acc:HGNC:17897]	12	101280109	101386616	q23.2	1
ENSG00000248187	574.584	-0.456	0.169	-2.693	0.00707427	0.04875	down			4	128567972	128570531	q28.2	-1
ENSG00000159658	4662.84	-0.211	0.078	-2.692	0.00709243	0.04881	down	EFCAB14	EF-hand calcium binding domain 14 [Source:HGNC Symbol;Acc:HGNC:29051]	1	46675159	46719064	p33	-1
ENSG00000127022	30429.3	-0.232	0.086	-2.691	0.00711319	0.04892	down	CANX	calnexin [Source:HGNC Symbol;Acc:HGNC:1473]	5	179678628	179730925	q35.3	1
ENSG00000146587	694.03	-0.396	0.147	-2.688	0.00717884	0.04902	down	RBAK	RB associated KRAB zinc finger [Source:HGNC Symbol;Acc:HGNC:17680]	7	5045821	5069488	p22.1	1
ENSG00000187257	711.088	-0.364	0.135	-2.69	0.00715356	0.04902	down	RSBN1L	round spermatid basic protein 1 like [Source:HGNC Symbol;Acc:HGNC:24765]	7	77696443	77783022	q11.23	1
ENSG00000196505	882.754	-0.333	0.124	-2.69	0.00714373	0.04902	down	GDAP2	ganglioside induced differentiation associated protein 2 [Source:HGNC Symbol;Acc:HGNC:18010]	1	117863485	117929630	p12	-1
ENSG00000131966	2345.91	-0.274	0.102	-2.689	0.00717341	0.04902	down	ACTR10	actin related protein 10 homolog [Source:HGNC Symbol;Acc:HGNC:17372]	14	58200080	58235636	q23.1	1
ENSG00000115020	3407.77	-0.269	0.1	-2.689	0.00716157	0.04902	down	PIKFYVE	phosphoinositide kinase, FYVE-type zinc finger containing [Source:HGNC Symbol;Acc:HGNC:23785]	2	208266267	208358751	q34	1
ENSG00000075292	4018.81	-0.261	0.097	-2.689	0.00716645	0.04902	down	ZNF638	zinc finger protein 638 [Source:HGNC Symbol;Acc:HGNC:17894]	2	71276561	71435069	p13.3	1
ENSG00000166226	3030.09	-0.235	0.088	-2.69	0.00715043	0.04902	down	CCT2	chaperonin containing TCP1 subunit 2 [Source:HGNC Symbol;Acc:HGNC:1615]	12	69585334	69601570	q15	1
ENSG00000025796	3665.47	-0.291	0.108	-2.687	0.00721241	0.04912	down	SEC63	SEC63 homolog, protein translocation regulator [Source:HGNC Symbol;Acc:HGNC:21082]	6	107867756	107958189	q21	-1
ENSG00000108829	2682.06	-0.218	0.081	-2.687	0.0072151	0.04912	down	LRRC59	leucine rich repeat containing 59 [Source:HGNC Symbol;Acc:HGNC:28817]	17	50375059	50397553	q21.33	-1
ENSG00000172766	974.954	-0.397	0.148	-2.686	0.00722909	0.04918	down	NAA16	N(alpha)-acetyltransferase 16, NatA auxiliary subunit [Source:HGNC Symbol;Acc:HGNC:26164]	13	41311205	41377030	q14.11	1
ENSG00000136147	888.085	-0.328	0.122	-2.683	0.0072859	0.04949	down	PHF11	PHD finger protein 11 [Source:HGNC Symbol;Acc:HGNC:17024]	13	49495610	49528987	q14.2	1
ENSG00000147274	2525.88	-0.245	0.091	-2.682	0.00732185	0.04968	down	RBMX	RNA binding motif protein, X-linked [Source:HGNC Symbol;Acc:HGNC:9910]	X	136848004	136880764	q26.3	-1
