# Supplementary material for: The antibiotic bedaquiline activates host macrophage innate immune resistance to bacterial infection
Source: eLife. 2020 May 4;9:e55692. doi: 10.7554/eLife.55692 (PMC7200153; doi:10.7554/eLife.55692)
Supplement: Figure 5—source data 1. — FDR < 0.05. [file elife-55692-fig5-data1.xlsx]

## Sheet: Feuil1
ensembl_gene_id	baseMean	log2FoldChange	lfcSE	stat	pvalue	padj	direction	hgnc_symbol	description	chromosome_name	start_position	end_position	band	strand
ENSG00000168101	1079.89	0.380916	0.083885	4.54093	5.6007e-06	0.02606	up	NUDT16L1	nudix hydrolase 16 like 1 [Source:HGNC Symbol;Acc:HGNC:28154]	16	4693694	4695859	p13.3	1
ENSG00000198087	585.061	-0.286079	0.0639814	-4.47129	7.77508e-06	0.02606	down	CD2AP	CD2 associated protein [Source:HGNC Symbol;Acc:HGNC:14258]	6	47477789	47627263	p12.3	1
ENSG00000164219	565.702	-0.320443	0.0720935	-4.44482	8.79662e-06	0.02606	down	PGGT1B	protein geranylgeranyltransferase type I subunit beta [Source:HGNC Symbol;Acc:HGNC:8895]	5	115204012	115262877	q22.3	-1
ENSG00000161618	1176.23	0.421374	0.099792	4.22252	2.41581e-05	0.04763	up	ALDH16A1	aldehyde dehydrogenase 16 family member A1 [Source:HGNC Symbol;Acc:HGNC:28114]	19	49453225	49471050	q13.33	1
ENSG00000196976	374.762	0.48858	0.116683	4.18724	2.82362e-05	0.04763	up	LAGE3	L antigen family member 3 [Source:HGNC Symbol;Acc:HGNC:26058]	X	154477769	154479257	q28	-1
ENSG00000197020	251.442	-0.380754	0.0922812	-4.12602	3.69091e-05	0.04763	down	ZNF100	zinc finger protein 100 [Source:HGNC Symbol;Acc:HGNC:12880]	19	21722771	21767579	p12	-1
ENSG00000198162	912.934	-0.213288	0.0517402	-4.12229	3.75118e-05	0.04763	down	MAN1A2	mannosidase alpha class 1A member 2 [Source:HGNC Symbol;Acc:HGNC:6822]	1	117367449	117528872	p12	1
