# Supplementary material for: The antibiotic bedaquiline activates host macrophage innate immune resistance to bacterial infection
Source: eLife. 2020 May 4;9:e55692. doi: 10.7554/eLife.55692 (PMC7200153; doi:10.7554/eLife.55692)
Supplement: Figure 5—source data 2. — FDR < 0.05. [file elife-55692-fig5-data2.xlsx]

## Sheet: Feuil1
ensembl_gene_id	baseMean	log2FoldChange	lfcSE	stat	pvalue	padj	direction	hgnc_symbol	description	chromosome_name	start_position	end_position	band	strand
ENSG00000173575	2164.68	-1.16559	0.0843451	-13.8193	1.94844e-43	2.248e-39	down	CHD2	chromodomain helicase DNA binding protein 2 [Source:HGNC Symbol;Acc:HGNC:1917]	15	92900189	93027996	q26.1	1
ENSG00000136161	6928.81	-0.544576	0.0466226	-11.6805	1.60313e-31	9.246e-28	down	RCBTB2	RCC1 and BTB domain containing protein 2 [Source:HGNC Symbol;Acc:HGNC:1914]	13	48488959	48533256	q14.2	-1
ENSG00000157193	829.155	0.563454	0.0535612	10.5198	7.00127e-26	2.692e-22	up	LRP8	LDL receptor related protein 8 [Source:HGNC Symbol;Acc:HGNC:6700]	1	53242364	53328469	p32.3	-1
ENSG00000165795	1653.33	-0.726306	0.0729491	-9.95634	2.36608e-23	6.823e-20	down	NDRG2	NDRG family member 2 [Source:HGNC Symbol;Acc:HGNC:14460]	14	21016763	21070872	q11.2	-1
ENSG00000112759	3760.44	-0.339746	0.0342428	-9.92168	3.35055e-23	7.73e-20	down	SLC29A1	solute carrier family 29 member 1 (Augustine blood group) [Source:HGNC Symbol;Acc:HGNC:11003]	6	44219505	44234151	p21.1	1
ENSG00000167202	5086.83	-0.38205	0.0397862	-9.60258	7.79715e-22	1.499e-18	down	TBC1D2B	TBC1 domain family member 2B [Source:HGNC Symbol;Acc:HGNC:29183]	15	77984036	78077724	q25.1	-1
ENSG00000196405	15012.5	-0.370164	0.0386441	-9.57878	9.82003e-22	1.618e-18	down	EVL	Enah/Vasp-like [Source:HGNC Symbol;Acc:HGNC:20234]	14	99971449	100144236	q32.2	1
ENSG00000099194	26790.8	0.472943	0.0501914	9.42277	4.39338e-21	6.335e-18	up	SCD	stearoyl-CoA desaturase [Source:HGNC Symbol;Acc:HGNC:10571]	10	100347233	100364826	q24.31	1
ENSG00000116701	33022.5	-0.330068	0.0365049	-9.04176	1.54167e-19	1.976e-16	down	NCF2	neutrophil cytosolic factor 2 [Source:HGNC Symbol;Acc:HGNC:7661]	1	183555563	183590876	q25.3	-1
ENSG00000044574	15697	0.442674	0.0519855	8.51532	1.66129e-17	1.916e-14	up	HSPA5	heat shock protein family A (Hsp70) member 5 [Source:HGNC Symbol;Acc:HGNC:5238]	9	125234853	125241343	q33.3	-1
ENSG00000137312	1218.19	0.406556	0.0491385	8.27367	1.29901e-16	1.362e-13	up	FLOT1	flotillin 1 [Source:HGNC Symbol;Acc:HGNC:3757]	6	30727709	30742732	p21.33	-1
ENSG00000124762	14240.2	0.342946	0.0419323	8.17856	2.87268e-16	2.761e-13	up	CDKN1A	cyclin dependent kinase inhibitor 1A [Source:HGNC Symbol;Acc:HGNC:1784]	6	36676460	36687339	p21.2	1
ENSG00000148180	47311.9	-0.297686	0.0365552	-8.14348	3.84083e-16	3.408e-13	down	GSN	gelsolin [Source:HGNC Symbol;Acc:HGNC:4620]	9	121207794	121332843	q33.2	1
ENSG00000138964	4536.85	-0.371145	0.0458253	-8.09914	5.53487e-16	4.56e-13	down	PARVG	parvin gamma [Source:HGNC Symbol;Acc:HGNC:14654]	22	44172956	44219533	q13.31	1
ENSG00000172936	10984.3	-0.231733	0.0300978	-7.69932	1.36793e-14	1.052e-11	down	MYD88	MYD88 innate immune signal transduction adaptor [Source:HGNC Symbol;Acc:HGNC:7562]	3	38138478	38143022	p22.2	1
ENSG00000100234	14956	0.377047	0.0502979	7.49627	6.56588e-14	4.734e-11	up	TIMP3	TIMP metallopeptidase inhibitor 3 [Source:HGNC Symbol;Acc:HGNC:11822]	22	32801701	32863043	q12.3	1
ENSG00000139289	1687.03	0.478759	0.0647546	7.39343	1.43086e-13	9.709e-11	up	PHLDA1	pleckstrin homology like domain family A member 1 [Source:HGNC Symbol;Acc:HGNC:8933]	12	76025447	76033932	q21.2	-1
ENSG00000111012	7139.5	-0.477058	0.0647391	-7.36893	1.72004e-13	1.102e-10	down	CYP27B1	cytochrome P450 family 27 subfamily B member 1 [Source:HGNC Symbol;Acc:HGNC:2606]	12	57762334	57768986	q14.1	-1
ENSG00000160883	32579.7	-0.359983	0.0489036	-7.36106	1.82451e-13	1.108e-10	down	HK3	hexokinase 3 [Source:HGNC Symbol;Acc:HGNC:4925]	5	176880869	176899346	q35.2	-1
ENSG00000165474	2330.38	-0.407646	0.0556662	-7.32305	2.42405e-13	1.398e-10	down	GJB2	gap junction protein beta 2 [Source:HGNC Symbol;Acc:HGNC:4284]	13	20187463	20192938	q12.11	-1
ENSG00000166347	1098.82	-0.465851	0.0648722	-7.18105	6.91771e-13	3.8e-10	down	CYB5A	cytochrome b5 type A [Source:HGNC Symbol;Acc:HGNC:2570]	18	74250846	74291973	q22.3	-1
ENSG00000143387	2457.81	-0.366846	0.0515244	-7.11985	1.08041e-12	5.665e-10	down	CTSK	cathepsin K [Source:HGNC Symbol;Acc:HGNC:2536]	1	150796208	150808260	q21.3	-1
ENSG00000063438	143.611	0.803949	0.116034	6.92859	4.25064e-12	2.132e-09	up	AHRR	aryl-hydrocarbon receptor repressor [Source:HGNC Symbol;Acc:HGNC:346]	5	321759	435110	p15.33	1
ENSG00000117115	2956.74	-0.468917	0.0679451	-6.9014	5.14924e-12	2.475e-09	down	PADI2	peptidyl arginine deiminase 2 [Source:HGNC Symbol;Acc:HGNC:18341]	1	17066761	17119451	p36.13	-1
ENSG00000156414	2321.39	-0.315399	0.0464658	-6.78777	1.13879e-11	5.254e-09	down	TDRD9	tudor domain containing 9 [Source:HGNC Symbol;Acc:HGNC:20122]	14	103928456	104052667	q32.33	1
ENSG00000125730	3800.1	0.245295	0.0369664	6.6356	3.23178e-11	1.408e-08	up	C3	complement C3 [Source:HGNC Symbol;Acc:HGNC:1318]	19	6677704	6730562	p13.3	-1
ENSG00000198363	3792.37	0.245962	0.0370831	6.63273	3.29536e-11	1.408e-08	up	ASPH	aspartate beta-hydroxylase [Source:HGNC Symbol;Acc:HGNC:757]	8	61500556	61714640	q12.3	-1
ENSG00000104738	1171.04	-0.378359	0.0572282	-6.61141	3.80666e-11	1.568e-08	down	MCM4	minichromosome maintenance complex component 4 [Source:HGNC Symbol;Acc:HGNC:6947]	8	47960185	47978160	q11.21	1
ENSG00000163932	12319.1	-0.1491	0.0228987	-6.51127	7.4517e-11	2.964e-08	down	PRKCD	protein kinase C delta [Source:HGNC Symbol;Acc:HGNC:9399]	3	53156009	53192717	p21.1	1
ENSG00000134242	1467.55	-0.343261	0.0528231	-6.49832	8.12241e-11	3.123e-08	down	PTPN22	protein tyrosine phosphatase non-receptor type 22 [Source:HGNC Symbol;Acc:HGNC:9652]	1	113813811	113871753	p13.2	-1
ENSG00000173210	143.042	0.757229	0.11776	6.43028	1.27373e-10	4.74e-08	up	ABLIM3	actin binding LIM protein family member 3 [Source:HGNC Symbol;Acc:HGNC:29132]	5	149141483	149260542	q32	1
ENSG00000149428	3202.24	0.461248	0.0735724	6.26931	3.62644e-10	1.307e-07	up	HYOU1	hypoxia up-regulated 1 [Source:HGNC Symbol;Acc:HGNC:16931]	11	119044188	119057227	q23.3	-1
ENSG00000133943	2468.19	-0.211717	0.0338095	-6.26204	3.79967e-10	1.328e-07	down	DGLUCY	D-glutamate cyclase [Source:HGNC Symbol;Acc:HGNC:20498]	14	91060333	91225632	q32.11	1
ENSG00000160593	3108.63	-0.41743	0.0669774	-6.2324	4.59347e-10	1.558e-07	down	JAML	junction adhesion molecule like [Source:HGNC Symbol;Acc:HGNC:19084]	11	118193725	118225094	q23.3	-1
ENSG00000008382	1359.93	-0.377974	0.0621074	-6.08581	1.15901e-09	3.518e-07	down	MPND	MPN domain containing [Source:HGNC Symbol;Acc:HGNC:25934]	19	4343527	4360086	p13.3	1
ENSG00000074181	1099.05	0.512997	0.0841201	6.09838	1.07147e-09	3.518e-07	up	NOTCH3	notch receptor 3 [Source:HGNC Symbol;Acc:HGNC:7883]	19	15159038	15200995	p13.12	-1
ENSG00000133048	159080	-0.222809	0.0365904	-6.08928	1.13419e-09	3.518e-07	down	CHI3L1	chitinase 3 like 1 [Source:HGNC Symbol;Acc:HGNC:1932]	1	203178931	203186704	q32.1	-1
ENSG00000134324	1807.88	0.241392	0.039624	6.09205	1.11471e-09	3.518e-07	up	LPIN1	lipin 1 [Source:HGNC Symbol;Acc:HGNC:13345]	2	11677595	11827409	p25.1	1
ENSG00000133961	14781	-0.23344	0.038734	-6.02675	1.67285e-09	4.948e-07	down	NUMB	NUMB endocytic adaptor protein [Source:HGNC Symbol;Acc:HGNC:8060]	14	73275107	73458617	q24.3	-1
ENSG00000120437	7612.74	-0.282363	0.0470016	-6.00753	1.88376e-09	5.3e-07	down	ACAT2	acetyl-CoA acetyltransferase 2 [Source:HGNC Symbol;Acc:HGNC:94]	6	159762045	159779112	q25.3	1
ENSG00000166598	14092.1	0.321321	0.0534657	6.00985	1.85695e-09	5.3e-07	up	HSP90B1	heat shock protein 90 beta family member 1 [Source:HGNC Symbol;Acc:HGNC:12028]	12	103930107	103953645	q23.3	1
ENSG00000143554	4368.33	-0.430518	0.0718919	-5.9884	2.11916e-09	5.82e-07	down	SLC27A3	solute carrier family 27 member 3 [Source:HGNC Symbol;Acc:HGNC:10997]	1	153774354	153780157	q21.3	1
ENSG00000140450	1646.94	0.269052	0.0451215	5.96284	2.4789e-09	6.65e-07	up	ARRDC4	arrestin domain containing 4 [Source:HGNC Symbol;Acc:HGNC:28087]	15	97960703	97973833	q26.2	1
ENSG00000025434	15552.3	-0.221874	0.0372371	-5.9584	2.54716e-09	6.678e-07	down	NR1H3	nuclear receptor subfamily 1 group H member 3 [Source:HGNC Symbol;Acc:HGNC:7966]	11	47248300	47269033	p11.2	1
ENSG00000186635	18896.2	-0.187162	0.0314917	-5.94322	2.79484e-09	7.164e-07	down	ARAP1	ArfGAP with RhoGAP domain, ankyrin repeat and PH domain 1 [Source:HGNC Symbol;Acc:HGNC:16925]	11	72685069	72793599	q13.4	-1
ENSG00000167680	707.37	0.78102	0.131639	5.93306	2.97332e-09	7.456e-07	up	SEMA6B	semaphorin 6B [Source:HGNC Symbol;Acc:HGNC:10739]	19	4542593	4559684	p13.3	-1
ENSG00000129353	3850.59	-0.350239	0.0597319	-5.86352	4.53163e-09	1.112e-06	down	SLC44A2	solute carrier family 44 member 2 [Source:HGNC Symbol;Acc:HGNC:17292]	19	10602457	10644557	p13.2	1
ENSG00000139970	1280.54	-0.328232	0.0563925	-5.82049	5.86767e-09	1.41e-06	down	RTN1	reticulon 1 [Source:HGNC Symbol;Acc:HGNC:10467]	14	59595976	59870776	q23.1	-1
ENSG00000150593	1278.91	-0.339413	0.0586489	-5.78721	7.15651e-09	1.685e-06	down	PDCD4	programmed cell death 4 [Source:HGNC Symbol;Acc:HGNC:8763]	10	110871795	110900006	q25.2	1
ENSG00000121691	4352.35	-0.191261	0.033103	-5.77776	7.57032e-09	1.746e-06	down	CAT	catalase [Source:HGNC Symbol;Acc:HGNC:1516]	11	34438934	34472060	p13	1
ENSG00000119321	10365.9	-0.164617	0.029074	-5.662	1.49619e-08	3.384e-06	down	FKBP15	FKBP prolyl isomerase 15 [Source:HGNC Symbol;Acc:HGNC:23397]	9	113161006	113221318	q32	-1
ENSG00000172893	371.925	0.521621	0.0922357	5.65531	1.55566e-08	3.451e-06	up	DHCR7	7-dehydrocholesterol reductase [Source:HGNC Symbol;Acc:HGNC:2860]	11	71428193	71452868	q13.4	-1
ENSG00000104267	8666.72	-0.243488	0.0431734	-5.63976	1.70291e-08	3.706e-06	down	CA2	carbonic anhydrase 2 [Source:HGNC Symbol;Acc:HGNC:1373]	8	85463968	85481493	q21.2	1
ENSG00000100600	2077.38	0.266462	0.0473497	5.62754	1.82797e-08	3.859e-06	up	LGMN	legumain [Source:HGNC Symbol;Acc:HGNC:9472]	14	92703807	92748679	q32.12	-1
ENSG00000135094	588.766	0.501757	0.0891789	5.62641	1.83996e-08	3.859e-06	up	SDS	serine dehydratase [Source:HGNC Symbol;Acc:HGNC:10691]	12	113392445	113426301	q24.13	-1
ENSG00000214944	418.599	-0.55606	0.099586	-5.58371	2.35435e-08	4.85e-06	down	ARHGEF28	Rho guanine nucleotide exchange factor 28 [Source:HGNC Symbol;Acc:HGNC:30322]	5	73626158	73941993	q13.2	1
ENSG00000133055	208.173	0.496605	0.0893191	5.5599	2.69925e-08	5.462e-06	up	MYBPH	myosin binding protein H [Source:HGNC Symbol;Acc:HGNC:7552]	1	203167811	203175826	q32.1	-1
ENSG00000124766	607.476	-0.359878	0.0649007	-5.54505	2.93866e-08	5.844e-06	down	SOX4	SRY-box transcription factor 4 [Source:HGNC Symbol;Acc:HGNC:11200]	6	21593751	21598619	p22.3	1
ENSG00000169299	3381.96	-0.221907	0.0402116	-5.51849	3.41934e-08	6.685e-06	down	PGM2	phosphoglucomutase 2 [Source:HGNC Symbol;Acc:HGNC:8906]	4	37826660	37862937	p14	1
ENSG00000135363	1391.64	-0.277558	0.0513421	-5.40604	6.44318e-08	1.239e-05	down	LMO2	LIM domain only 2 [Source:HGNC Symbol;Acc:HGNC:6642]	11	33858576	33892076	p13	-1
ENSG00000163346	2591.93	-0.231856	0.043234	-5.36282	8.19345e-08	1.549e-05	down	PBXIP1	PBX homeobox interacting protein 1 [Source:HGNC Symbol;Acc:HGNC:21199]	1	154944076	154956123	q21.3	-1
ENSG00000232258	531.998	-0.503381	0.0940076	-5.35468	8.57058e-08	1.595e-05	down	TMEM114	transmembrane protein 114 [Source:HGNC Symbol;Acc:HGNC:33227]	16	8537605	8590193	p13.2	-1
ENSG00000255197	295.975	-0.543085	0.101732	-5.33837	9.37843e-08	1.717e-05	down		novel transcript	11	47381509	47409369	p11.2	-1
ENSG00000143799	3091.09	-0.206016	0.0392166	-5.25328	1.49412e-07	2.693e-05	down	PARP1	poly(ADP-ribose) polymerase 1 [Source:HGNC Symbol;Acc:HGNC:270]	1	226360691	226408093	q42.12	-1
ENSG00000138061	24328.2	0.363233	0.0692277	5.24693	1.54652e-07	2.744e-05	up	CYP1B1	cytochrome P450 family 1 subfamily B member 1 [Source:HGNC Symbol;Acc:HGNC:2597]	2	38066973	38109902	p22.2	-1
ENSG00000096384	26661.5	0.149816	0.0285776	5.24244	1.5847e-07	2.77e-05	up	HSP90AB1	heat shock protein 90 alpha family class B member 1 [Source:HGNC Symbol;Acc:HGNC:5258]	6	44246166	44253888	p21.1	1
ENSG00000166508	942.073	-0.455981	0.0872149	-5.22824	1.71132e-07	2.946e-05	down	MCM7	minichromosome maintenance complex component 7 [Source:HGNC Symbol;Acc:HGNC:6950]	7	100092728	100101940	q22.1	-1
ENSG00000184292	1154.84	-0.502103	0.0964808	-5.20417	1.94861e-07	3.305e-05	down	TACSTD2	tumor associated calcium signal transducer 2 [Source:HGNC Symbol;Acc:HGNC:11530]	1	58575433	58577252	p32.1	-1
ENSG00000063601	3590.12	-0.203551	0.0391576	-5.19824	2.01183e-07	3.363e-05	down	MTMR1	myotubularin related protein 1 [Source:HGNC Symbol;Acc:HGNC:7449]	X	150692971	150765108	q28	1
ENSG00000040531	4921.73	0.185338	0.035784	5.17937	2.22635e-07	3.567e-05	up	CTNS	cystinosin, lysosomal cystine transporter [Source:HGNC Symbol;Acc:HGNC:2518]	17	3636468	3661542	p13.2	1
ENSG00000104687	6168.51	0.209931	0.0405291	5.17976	2.22169e-07	3.567e-05	up	GSR	glutathione-disulfide reductase [Source:HGNC Symbol;Acc:HGNC:4623]	8	30678066	30727846	p12	-1
ENSG00000276649	100.229	-0.798297	0.154117	-5.17981	2.22112e-07	3.567e-05	down		novel transcript, antisense to SIRPA	20	1888128	1894374	p13	-1
ENSG00000119408	18033.8	-0.164904	0.031955	-5.16051	2.46278e-07	3.892e-05	down	NEK6	NIMA related kinase 6 [Source:HGNC Symbol;Acc:HGNC:7749]	9	124257606	124353307	q33.3	1
ENSG00000164211	2228.46	0.253879	0.0495389	5.12484	2.97789e-07	4.642e-05	up	STARD4	StAR related lipid transfer domain containing 4 [Source:HGNC Symbol;Acc:HGNC:18058]	5	111496033	111512590	q22.1	-1
ENSG00000101336	7830.87	-0.210225	0.0410984	-5.11516	3.13469e-07	4.821e-05	down	HCK	HCK proto-oncogene, Src family tyrosine kinase [Source:HGNC Symbol;Acc:HGNC:4840]	20	32052188	32101856	q11.21	1
ENSG00000100418	1602.13	0.199737	0.0390836	5.1105	3.21303e-07	4.877e-05	up	DESI1	desumoylating isopeptidase 1 [Source:HGNC Symbol;Acc:HGNC:24577]	22	41598028	41621043	q13.2	-1
ENSG00000167107	786.438	-0.30283	0.059482	-5.09112	3.55953e-07	5.332e-05	down	ACSF2	acyl-CoA synthetase family member 2 [Source:HGNC Symbol;Acc:HGNC:26101]	17	50426158	50474845	q21.33	1
ENSG00000108523	1675.42	0.214319	0.0421316	5.08688	3.63994e-07	5.383e-05	up	RNF167	ring finger protein 167 [Source:HGNC Symbol;Acc:HGNC:24544]	17	4940008	4945222	p13.2	1
ENSG00000116337	1904.71	-0.218172	0.0430193	-5.07149	3.94714e-07	5.552e-05	down	AMPD2	adenosine monophosphate deaminase 2 [Source:HGNC Symbol;Acc:HGNC:469]	1	109616104	109632053	p13.3	1
ENSG00000163959	231.395	0.545947	0.107584	5.07462	3.88264e-07	5.552e-05	up	SLC51A	solute carrier family 51 alpha subunit [Source:HGNC Symbol;Acc:HGNC:29955]	3	196211487	196243178	q29	1
ENSG00000165025	8047.93	-0.147014	0.0289537	-5.07754	3.82354e-07	5.552e-05	down	SYK	spleen associated tyrosine kinase [Source:HGNC Symbol;Acc:HGNC:11491]	9	90801787	90898549	q22.2	1
ENSG00000186480	3245.09	0.259442	0.0511446	5.07271	3.92183e-07	5.552e-05	up	INSIG1	insulin induced gene 1 [Source:HGNC Symbol;Acc:HGNC:6083]	7	155297776	155310235	q36.3	1
ENSG00000198380	1135.84	0.304872	0.0607009	5.02253	5.0996e-07	7.087e-05	up	GFPT1	glutamine--fructose-6-phosphate transaminase 1 [Source:HGNC Symbol;Acc:HGNC:4241]	2	69319769	69387254	p13.3	-1
ENSG00000127948	2322.49	0.268022	0.0533959	5.01951	5.18031e-07	7.114e-05	up	POR	cytochrome p450 oxidoreductase [Source:HGNC Symbol;Acc:HGNC:9208]	7	75899200	75986855	q11.23	1
ENSG00000082641	6734.26	0.157689	0.0314933	5.00707	5.52639e-07	7.5e-05	up	NFE2L1	nuclear factor, erythroid 2 like 1 [Source:HGNC Symbol;Acc:HGNC:7781]	17	48048329	48061545	q21.32	1
ENSG00000244242	682.607	0.392581	0.0787508	4.98511	6.19277e-07	8.306e-05	up	IFITM10	interferon induced transmembrane protein 10 [Source:HGNC Symbol;Acc:HGNC:40022]	11	1732406	1750595	p15.5	-1
ENSG00000122986	2250.77	-0.223969	0.0449659	-4.98087	6.33e-07	8.393e-05	down	HVCN1	hydrogen voltage gated channel 1 [Source:HGNC Symbol;Acc:HGNC:28240]	12	110627841	110704950	q24.11	-1
ENSG00000198431	35944.5	0.216311	0.0436023	4.96101	7.01288e-07	9.192e-05	up	TXNRD1	thioredoxin reductase 1 [Source:HGNC Symbol;Acc:HGNC:12437]	12	104215779	104350307	q23.3	1
ENSG00000064201	1508.56	-0.379155	0.0764815	-4.95747	7.14176e-07	9.256e-05	down	TSPAN32	tetraspanin 32 [Source:HGNC Symbol;Acc:HGNC:13410]	11	2301997	2318200	p15.5	1
ENSG00000184575	2385.86	0.193521	0.0390607	4.95436	7.25705e-07	9.301e-05	up	XPOT	exportin for tRNA [Source:HGNC Symbol;Acc:HGNC:12826]	12	64404392	64451125	q14.2	1
ENSG00000150961	2675.89	0.229908	0.0469726	4.89452	9.8548e-07	0.0001249	up	SEC24D	SEC24 homolog D, COPII coat complex component [Source:HGNC Symbol;Acc:HGNC:10706]	4	118722823	118838683	q26	-1
ENSG00000028528	5902.33	-0.156204	0.0319547	-4.8883	1.01709e-06	0.0001275	down	SNX1	sorting nexin 1 [Source:HGNC Symbol;Acc:HGNC:11172]	15	64094123	64146090	q22.31	1
ENSG00000048140	3972.38	-0.219191	0.0448657	-4.8855	1.03167e-06	0.000128	down	TSPAN17	tetraspanin 17 [Source:HGNC Symbol;Acc:HGNC:13594]	5	176647387	176659054	q35.2	1
ENSG00000259760	2101.86	-0.381421	0.0782136	-4.87667	1.07894e-06	0.0001324	down		novel transcript, antisense to LRRC28	15	99396613	99401315	q26.3	-1
ENSG00000139624	1091.56	-0.203981	0.0420681	-4.84883	1.2419e-06	0.0001477	down	CERS5	ceramide synthase 5 [Source:HGNC Symbol;Acc:HGNC:23749]	12	50129299	50167533	q13.12	-1
ENSG00000145050	795.191	0.422485	0.0871123	4.8499	1.23526e-06	0.0001477	up	MANF	mesencephalic astrocyte derived neurotrophic factor [Source:HGNC Symbol;Acc:HGNC:15461]	3	51385291	51389397	p21.2	1
ENSG00000196730	4656.98	-0.14026	0.0289182	-4.85024	1.23315e-06	0.0001477	down	DAPK1	death associated protein kinase 1 [Source:HGNC Symbol;Acc:HGNC:2674]	9	87497228	87708634	q21.33	1
ENSG00000154822	493.266	-0.328585	0.0679043	-4.83895	1.30528e-06	0.0001536	down	PLCL2	phospholipase C like 2 [Source:HGNC Symbol;Acc:HGNC:9064]	3	16802651	17090604	p24.3	1
ENSG00000140961	957.242	0.389244	0.0805846	4.83024	1.36366e-06	0.0001557	up	OSGIN1	oxidative stress induced growth inhibitor 1 [Source:HGNC Symbol;Acc:HGNC:30093]	16	83931311	83966332	q23.3	1
ENSG00000147650	1252.44	0.276933	0.0572887	4.83398	1.33829e-06	0.0001557	up	LRP12	LDL receptor related protein 12 [Source:HGNC Symbol;Acc:HGNC:31708]	8	104489231	104589024	q22.3	-1
ENSG00000168389	1923.54	0.2149	0.0444775	4.83166	1.35396e-06	0.0001557	up	MFSD2A	major facilitator superfamily domain containing 2A [Source:HGNC Symbol;Acc:HGNC:25897]	1	39955112	39969968	p34.2	1
ENSG00000110237	468.798	-0.375389	0.0778331	-4.82299	1.4142e-06	0.0001599	down	ARHGEF17	Rho guanine nucleotide exchange factor 17 [Source:HGNC Symbol;Acc:HGNC:21726]	11	73308276	73369388	q13.4	1
ENSG00000158714	5528.61	-0.204321	0.0424401	-4.81433	1.47697e-06	0.0001647	down	SLAMF8	SLAM family member 8 [Source:HGNC Symbol;Acc:HGNC:21391]	1	159826811	159837492	q23.2	1
ENSG00000165490	384.248	-0.472036	0.098071	-4.81321	1.48527e-06	0.0001647	down	DDIAS	DNA damage induced apoptosis suppressor [Source:HGNC Symbol;Acc:HGNC:26351]	11	82899975	82958277	q14.1	1
ENSG00000111144	11395	-0.196891	0.0409754	-4.8051	1.54673e-06	0.0001699	down	LTA4H	leukotriene A4 hydrolase [Source:HGNC Symbol;Acc:HGNC:6710]	12	96000753	96043520	q23.1	-1
ENSG00000163219	4353.05	-0.161481	0.0338345	-4.77267	1.81798e-06	0.0001963	down	ARHGAP25	Rho GTPase activating protein 25 [Source:HGNC Symbol;Acc:HGNC:28951]	2	68679601	68826833	p13.3	1
ENSG00000262406	217.014	-0.536104	0.112335	-4.77238	1.82062e-06	0.0001963	down	MMP12	matrix metallopeptidase 12 [Source:HGNC Symbol;Acc:HGNC:7158]	11	102862736	102874982	q22.2	-1
ENSG00000103811	18192	-0.200297	0.0421776	-4.7489	2.04528e-06	0.0002184	down	CTSH	cathepsin H [Source:HGNC Symbol;Acc:HGNC:2535]	15	78921058	78949574	q25.1	-1
ENSG00000162512	921.949	0.316852	0.0670291	4.72707	2.2778e-06	0.000241	up	SDC3	syndecan 3 [Source:HGNC Symbol;Acc:HGNC:10660]	1	30869466	30908758	p35.2	-1
ENSG00000065833	755.941	0.29537	0.0626712	4.71302	2.44077e-06	0.0002559	up	ME1	malic enzyme 1 [Source:HGNC Symbol;Acc:HGNC:6983]	6	83210402	83431051	q14.2	-1
ENSG00000162298	1305.45	0.321605	0.0686554	4.68433	2.80874e-06	0.0002893	up	SYVN1	synoviolin 1 [Source:HGNC Symbol;Acc:HGNC:20738]	11	65121780	65134533	q13.1	-1
ENSG00000172578	9050.74	-0.15786	0.0336934	-4.6852	2.7969e-06	0.0002893	down	KLHL6	kelch like family member 6 [Source:HGNC Symbol;Acc:HGNC:18653]	3	183487551	183555706	q27.1	-1
ENSG00000277969	266.506	-0.377176	0.0809636	-4.65859	3.1839e-06	0.000325	down		novel transcript	17	38702452	38704747	q12	1
ENSG00000169136	1223.6	0.201849	0.0433534	4.65589	3.22577e-06	0.0003264	up	ATF5	activating transcription factor 5 [Source:HGNC Symbol;Acc:HGNC:790]	19	49928702	49933935	q13.33	1
ENSG00000101150	3790.33	0.145603	0.0312966	4.65238	3.2813e-06	0.0003291	up	TPD52L2	TPD52 like 2 [Source:HGNC Symbol;Acc:HGNC:12007]	20	63865228	63891545	q13.33	1
ENSG00000130164	1808.85	0.244073	0.0526123	4.63909	3.49943e-06	0.000348	up	LDLR	low density lipoprotein receptor [Source:HGNC Symbol;Acc:HGNC:6547]	19	11089362	11133816	p13.2	1
ENSG00000108671	2343.07	0.173762	0.0375555	4.6268	3.71367e-06	0.0003661	up	PSMD11	proteasome 26S subunit, non-ATPase 11 [Source:HGNC Symbol;Acc:HGNC:9556]	17	32444379	32483319	q11.2	1
ENSG00000130340	2821.5	0.148805	0.0322532	4.61365	3.95657e-06	0.0003868	up	SNX9	sorting nexin 9 [Source:HGNC Symbol;Acc:HGNC:14973]	6	157700387	157945077	q25.3	1
ENSG00000011007	1732.79	0.206128	0.0447221	4.60908	4.04448e-06	0.000392	up	ELOA	elongin A [Source:HGNC Symbol;Acc:HGNC:11620]	1	23743155	23762059	p36.11	1
ENSG00000140403	791.726	0.209692	0.0455443	4.60413	4.14202e-06	0.0003982	up	DNAJA4	DnaJ heat shock protein family (Hsp40) member A4 [Source:HGNC Symbol;Acc:HGNC:14885]	15	78264086	78282196	q25.1	1
ENSG00000163235	427.294	0.354925	0.0772602	4.59389	4.35062e-06	0.0004147	up	TGFA	transforming growth factor alpha [Source:HGNC Symbol;Acc:HGNC:11765]	2	70447284	70554193	p13.3	-1
ENSG00000168918	2490.05	-0.225344	0.0492156	-4.5787	4.67872e-06	0.0004424	down	INPP5D	inositol polyphosphate-5-phosphatase D [Source:HGNC Symbol;Acc:HGNC:6079]	2	233059967	233207903	q37.1	1
ENSG00000174004	2587.22	0.207353	0.045324	4.57491	4.76421e-06	0.0004461	up	NRROS	negative regulator of reactive oxygen species [Source:HGNC Symbol;Acc:HGNC:24613]	3	196639694	196662004	q29	1
ENSG00000197256	100.2	-0.721039	0.157654	-4.57355	4.79539e-06	0.0004461	down	KANK2	KN motif and ankyrin repeat domains 2 [Source:HGNC Symbol;Acc:HGNC:29300]	19	11164267	11197791	p13.2	-1
ENSG00000100889	5132.96	-0.16641	0.0364139	-4.56995	4.87844e-06	0.0004502	down	PCK2	phosphoenolpyruvate carboxykinase 2, mitochondrial [Source:HGNC Symbol;Acc:HGNC:8725]	14	24094053	24110598	q11.2	1
ENSG00000127022	20283.5	0.219091	0.0481032	4.5546	5.24853e-06	0.0004805	up	CANX	calnexin [Source:HGNC Symbol;Acc:HGNC:1473]	5	179678628	179731641	q35.3	1
ENSG00000115271	1293.67	-0.31846	0.0699907	-4.55003	5.36383e-06	0.0004872	down	GCA	grancalcin [Source:HGNC Symbol;Acc:HGNC:15990]	2	162318840	162371595	q24.2	1
ENSG00000095370	746.347	-0.322694	0.0709588	-4.54762	5.4255e-06	0.0004889	down	SH2D3C	SH2 domain containing 3C [Source:HGNC Symbol;Acc:HGNC:16884]	9	127738317	127778710	q34.11	-1
ENSG00000138185	1376.99	-0.239356	0.0529025	-4.52447	6.05458e-06	0.0005414	down	ENTPD1	ectonucleoside triphosphate diphosphohydrolase 1 [Source:HGNC Symbol;Acc:HGNC:3363]	10	95711779	95877266	q24.1	1
ENSG00000101161	2310.56	-0.15899	0.035324	-4.50091	6.76647e-06	0.0006004	down	PRPF6	pre-mRNA processing factor 6 [Source:HGNC Symbol;Acc:HGNC:15860]	20	63981132	64033100	q13.33	1
ENSG00000096060	5831.72	-0.222464	0.0497469	-4.47191	7.75232e-06	0.0006826	down	FKBP5	FKBP prolyl isomerase 5 [Source:HGNC Symbol;Acc:HGNC:3721]	6	35573585	35728583	p21.31	-1
ENSG00000137936	621.013	0.233538	0.0524531	4.45231	8.49497e-06	0.0007423	up	BCAR3	BCAR3 adaptor protein, NSP family member [Source:HGNC Symbol;Acc:HGNC:973]	1	93561741	93847150	p22.1	-1
ENSG00000186281	966.022	-0.291869	0.0656863	-4.44337	8.85599e-06	0.0007681	down	GPAT2	glycerol-3-phosphate acyltransferase 2, mitochondrial [Source:HGNC Symbol;Acc:HGNC:27168]	2	96021946	96039451	q11.2	-1
ENSG00000100528	1839.23	0.201806	0.0454572	4.43947	9.01806e-06	0.0007763	up	CNIH1	cornichon family AMPA receptor auxiliary protein 1 [Source:HGNC Symbol;Acc:HGNC:19431]	14	54423561	54441391	q22.2	-1
ENSG00000071242	1521.92	0.22619	0.051064	4.42953	9.44393e-06	0.0008069	up	RPS6KA2	ribosomal protein S6 kinase A2 [Source:HGNC Symbol;Acc:HGNC:10431]	6	166409364	166906451	q27	-1
ENSG00000118777	1248.21	0.220407	0.0498993	4.41704	1.00062e-05	0.0008487	up	ABCG2	ATP binding cassette subfamily G member 2 (Junior blood group) [Source:HGNC Symbol;Acc:HGNC:74]	4	88090150	88231628	q22.1	-1
ENSG00000142512	261.885	-0.386258	0.0875454	-4.41209	1.0238e-05	0.000862	down	SIGLEC10	sialic acid binding Ig like lectin 10 [Source:HGNC Symbol;Acc:HGNC:15620]	19	51410020	51417803	q13.41	-1
ENSG00000075884	477.1	-0.328087	0.0746144	-4.3971	1.09706e-05	0.0009064	down	ARHGAP15	Rho GTPase activating protein 15 [Source:HGNC Symbol;Acc:HGNC:21030]	2	143091362	143768352	q22.2	1
ENSG00000260401	158.037	0.47703	0.108502	4.39649	1.10013e-05	0.0009064	up		novel transcript, overlapping to P2RY2	11	73238975	73242335	q13.4	1
ENSG00000261596	403.754	-0.379931	0.0864087	-4.3969	1.09806e-05	0.0009064	down		novel transcript, sense intronic to METTL9	16	21626742	21627569	p12.2	1
ENSG00000129244	265.284	1.17464	0.26736	4.39346	1.1156e-05	0.0009127	up	ATP1B2	ATPase Na+/K+ transporting subunit beta 2 [Source:HGNC Symbol;Acc:HGNC:805]	17	7646627	7657770	p13.1	1
ENSG00000146457	1594.44	0.16175	0.0368918	4.38445	1.16277e-05	0.0009445	up	WTAP	WT1 associated protein [Source:HGNC Symbol;Acc:HGNC:16846]	6	159725585	159756319	q25.3	1
ENSG00000112394	789.638	-0.340847	0.0778187	-4.38001	1.18676e-05	0.0009573	down	SLC16A10	solute carrier family 16 member 10 [Source:HGNC Symbol;Acc:HGNC:17027]	6	111087503	111231194	q21	1
ENSG00000196209	401.022	-0.408706	0.0933889	-4.37638	1.20664e-05	0.0009666	down	SIRPB2	signal regulatory protein beta 2 [Source:HGNC Symbol;Acc:HGNC:16247]	20	1470741	1491587	p13	-1
ENSG00000103257	565.636	0.478817	0.109449	4.37478	1.21552e-05	0.000967	up	SLC7A5	solute carrier family 7 member 5 [Source:HGNC Symbol;Acc:HGNC:11063]	16	87830023	87869507	q24.2	-1
ENSG00000136068	2367.3	0.270366	0.0621038	4.35346	1.34007e-05	0.001059	up	FLNB	filamin B [Source:HGNC Symbol;Acc:HGNC:3755]	3	58008400	58172251	p14.3	1
ENSG00000073331	2719.71	-0.180198	0.0414356	-4.34887	1.36839e-05	0.00107	down	ALPK1	alpha kinase 1 [Source:HGNC Symbol;Acc:HGNC:20917]	4	112285509	112442621	q25	1
ENSG00000137310	453.168	-0.447821	0.102991	-4.34814	1.37297e-05	0.00107	down	TCF19	transcription factor 19 [Source:HGNC Symbol;Acc:HGNC:11629]	6	31158547	31167159	p21.33	1
ENSG00000113657	909.273	0.37066	0.0853422	4.34322	1.4041e-05	0.001087	up	DPYSL3	dihydropyrimidinase like 3 [Source:HGNC Symbol;Acc:HGNC:3015]	5	147390808	147510068	q32	-1
ENSG00000134824	3189.02	0.256768	0.0595453	4.31216	1.6167e-05	0.001243	up	FADS2	fatty acid desaturase 2 [Source:HGNC Symbol;Acc:HGNC:3575]	11	61792980	61867354	q12.2	1
ENSG00000213123	146.93	0.542099	0.125772	4.31017	1.63131e-05	0.001246	up	TCTEX1D2	Tctex1 domain containing 2 [Source:HGNC Symbol;Acc:HGNC:28482]	3	196291219	196318299	q29	-1
ENSG00000135218	6697.4	0.196229	0.0456033	4.30296	1.6853e-05	0.001279	up	CD36	CD36 molecule [Source:HGNC Symbol;Acc:HGNC:1663]	7	80369575	80679277	q21.11	1
ENSG00000136250	1192.74	-0.216099	0.0502906	-4.29701	1.73114e-05	0.001305	down	AOAH	acyloxyacyl hydrolase [Source:HGNC Symbol;Acc:HGNC:548]	7	36512941	36724549	p14.2	-1
ENSG00000101350	943.785	0.226924	0.0528738	4.29181	1.77221e-05	0.001326	up	KIF3B	kinesin family member 3B [Source:HGNC Symbol;Acc:HGNC:6320]	20	32277651	32335011	q11.21	1
ENSG00000107738	1242.74	-0.229522	0.0534938	-4.29063	1.78167e-05	0.001326	down	VSIR	V-set immunoregulatory receptor [Source:HGNC Symbol;Acc:HGNC:30085]	10	71747556	71773520	q22.1	-1
ENSG00000136010	229.887	0.67049	0.156513	4.28394	1.83613e-05	0.001349	up	ALDH1L2	aldehyde dehydrogenase 1 family member L2 [Source:HGNC Symbol;Acc:HGNC:26777]	12	105019784	105107643	q23.3	-1
ENSG00000180539	101.351	-0.55973	0.130656	-4.284	1.83561e-05	0.001349	down	C9orf139	chromosome 9 open reading frame 139 [Source:HGNC Symbol;Acc:HGNC:31426]	9	137027464	137037957	q34.3	1
ENSG00000115902	7485.42	0.221498	0.0517547	4.27977	1.8709e-05	0.001366	up	SLC1A4	solute carrier family 1 member 4 [Source:HGNC Symbol;Acc:HGNC:10942]	2	64988477	65023865	p14	1
ENSG00000276289	122.653	0.488321	0.114263	4.27367	1.92279e-05	0.001395	up	KCNE1B	potassium voltage-gated channel subfamily E regulatory subunit 1B [Source:HGNC Symbol;Acc:HGNC:52280]	21	7816675	7829926	p11.2	-1
ENSG00000274286	4763.82	-0.220083	0.0516351	-4.26226	2.02369e-05	0.001459	down	ADRA2B	adrenoceptor alpha 2B [Source:HGNC Symbol;Acc:HGNC:282]	2	96112876	96116571	q11.2	-1
ENSG00000071246	3481.52	-0.182161	0.0427661	-4.25947	2.0491e-05	0.001468	down	VASH1	vasohibin 1 [Source:HGNC Symbol;Acc:HGNC:19964]	14	76761468	76783015	q24.3	1
ENSG00000179593	992.914	-0.29264	0.06875	-4.25659	2.07569e-05	0.001478	down	ALOX15B	arachidonate 15-lipoxygenase type B [Source:HGNC Symbol;Acc:HGNC:434]	17	8039034	8049134	p13.1	1
ENSG00000231811	352.877	-0.347617	0.0819587	-4.24137	2.22156e-05	0.001572	down		novel transcript	6	4341756	4347162	p25.1	-1
ENSG00000235568	5362.69	-0.249685	0.0589001	-4.23912	2.24395e-05	0.001578	down	NFAM1	NFAT activating protein with ITAM motif 1 [Source:HGNC Symbol;Acc:HGNC:29872]	22	42380410	42432395	q13.2	-1
ENSG00000077549	7683.27	-0.108308	0.0255594	-4.23752	2.26004e-05	0.00158	down	CAPZB	capping actin protein of muscle Z-line subunit beta [Source:HGNC Symbol;Acc:HGNC:1491]	1	19338775	19485539	p36.13	-1
ENSG00000120756	366.007	-0.394102	0.0930826	-4.23389	2.29679e-05	0.001596	down	PLS1	plastin 1 [Source:HGNC Symbol;Acc:HGNC:9090]	3	142596393	142713664	q23	1
ENSG00000187037	474.344	-0.333683	0.0789122	-4.22853	2.35225e-05	0.001625	down	GPR141	G protein-coupled receptor 141 [Source:HGNC Symbol;Acc:HGNC:19997]	7	37683796	37833788	p14.1	1
ENSG00000123983	2834.31	0.143119	0.0339613	4.21417	2.50702e-05	0.001721	up	ACSL3	acyl-CoA synthetase long chain family member 3 [Source:HGNC Symbol;Acc:HGNC:3570]	2	222860942	222944639	q36.1	1
ENSG00000060971	3471.93	-0.220765	0.052423	-4.21123	2.53981e-05	0.001734	down	ACAA1	acetyl-CoA acyltransferase 1 [Source:HGNC Symbol;Acc:HGNC:82]	3	38103129	38137242	p22.2	-1
ENSG00000143067	1633.28	-0.174735	0.0415064	-4.20984	2.55552e-05	0.001734	down	ZNF697	zinc finger protein 697 [Source:HGNC Symbol;Acc:HGNC:32034]	1	119619377	119648266	p12	-1
ENSG00000149218	375.163	0.276915	0.0658058	4.20806	2.57567e-05	0.001737	up	ENDOD1	endonuclease domain containing 1 [Source:HGNC Symbol;Acc:HGNC:29129]	11	95089846	95132645	q21	1
ENSG00000023909	584.562	0.265047	0.0630347	4.20479	2.61327e-05	0.001753	up	GCLM	glutamate-cysteine ligase modifier subunit [Source:HGNC Symbol;Acc:HGNC:4312]	1	93885199	93909456	p22.1	-1
ENSG00000133316	311.899	-0.320517	0.0762757	-4.20208	2.6447e-05	0.001763	down	WDR74	WD repeat domain 74 [Source:HGNC Symbol;Acc:HGNC:25529]	11	62832342	62841809	q12.3	-1
ENSG00000145819	862.235	0.268907	0.0644188	4.17436	2.98829e-05	0.001981	up	ARHGAP26	Rho GTPase activating protein 26 [Source:HGNC Symbol;Acc:HGNC:17073]	5	142770377	143229011	q31.3	1
ENSG00000132589	3316.78	-0.177787	0.0426552	-4.16799	3.07291e-05	0.002014	down	FLOT2	flotillin 2 [Source:HGNC Symbol;Acc:HGNC:3758]	17	28879335	28897733	q11.2	-1
ENSG00000166923	891.96	0.380584	0.0912857	4.16915	3.05736e-05	0.002014	up	GREM1	gremlin 1, DAN family BMP antagonist [Source:HGNC Symbol;Acc:HGNC:2001]	15	32718004	32745106	q13.3	1
ENSG00000145740	2472.11	0.167699	0.0402676	4.16461	3.11888e-05	0.002033	up	SLC30A5	solute carrier family 30 member 5 [Source:HGNC Symbol;Acc:HGNC:19089]	5	69093949	69131069	q13.1	1
ENSG00000134061	489.274	0.374487	0.0901151	4.15565	3.24368e-05	0.002102	up	CD180	CD180 molecule [Source:HGNC Symbol;Acc:HGNC:6726]	5	67179613	67196799	q12.3	-1
ENSG00000114126	744.327	-0.261616	0.0630567	-4.1489	3.34083e-05	0.002153	down	TFDP2	transcription factor Dp-2 [Source:HGNC Symbol;Acc:HGNC:11751]	3	141944428	142149544	q23	-1
ENSG00000225190	1394.72	0.2092	0.0505064	4.14205	3.44215e-05	0.002206	up	PLEKHM1	pleckstrin homology and RUN domain containing M1 [Source:HGNC Symbol;Acc:HGNC:29017]	17	45435900	45490749	q21.31	-1
ENSG00000134759	1063.98	-0.205838	0.0499747	-4.11885	3.80764e-05	0.002427	down	ELP2	elongator acetyltransferase complex subunit 2 [Source:HGNC Symbol;Acc:HGNC:18248]	18	36129444	36180557	q12.2	1
ENSG00000067836	684.709	-0.326226	0.0792733	-4.11521	3.86832e-05	0.002452	down	ROGDI	rogdi atypical leucine zipper [Source:HGNC Symbol;Acc:HGNC:29478]	16	4796968	4802950	p13.3	-1
ENSG00000143870	4984.64	0.23824	0.0579131	4.11374	3.89294e-05	0.002454	up	PDIA6	protein disulfide isomerase family A member 6 [Source:HGNC Symbol;Acc:HGNC:30168]	2	10783391	10837977	p25.1	-1
ENSG00000166793	787.133	-0.270098	0.0658147	-4.10392	4.06203e-05	0.002546	down	YPEL4	yippee like 4 [Source:HGNC Symbol;Acc:HGNC:18328]	11	57645087	57649944	q12.1	-1
ENSG00000167588	7858.24	-0.214683	0.0523781	-4.09873	4.15429e-05	0.00259	down	GPD1	glycerol-3-phosphate dehydrogenase 1 [Source:HGNC Symbol;Acc:HGNC:4455]	12	50103982	50111313	q13.12	1
ENSG00000214575	188.091	-0.409723	0.100157	-4.09083	4.29841e-05	0.002666	down	CPEB1	cytoplasmic polyadenylation element binding protein 1 [Source:HGNC Symbol;Acc:HGNC:21744]	15	82543201	82648861	q25.2	-1
ENSG00000137496	1027.99	0.22049	0.0539343	4.08813	4.34857e-05	0.002682	up	IL18BP	interleukin 18 binding protein [Source:HGNC Symbol;Acc:HGNC:5987]	11	71998613	72005715	q13.4	1
ENSG00000198855	383.163	0.304951	0.0746269	4.08633	4.38243e-05	0.002689	up	FICD	FIC domain containing [Source:HGNC Symbol;Acc:HGNC:18416]	12	108515277	108525837	q23.3	1
ENSG00000164733	220681	-0.111816	0.0274338	-4.07585	4.58468e-05	0.002798	down	CTSB	cathepsin B [Source:HGNC Symbol;Acc:HGNC:2527]	8	11842524	11869448	p23.1	-1
ENSG00000102781	369.933	0.287287	0.0705661	4.07118	4.67758e-05	0.00284	up	KATNAL1	katanin catalytic subunit A1 like 1 [Source:HGNC Symbol;Acc:HGNC:28361]	13	30202630	30307551	q12.3	-1
ENSG00000115194	1318.92	-0.28618	0.0707074	-4.04738	5.17943e-05	0.003128	down	SLC30A3	solute carrier family 30 member 3 [Source:HGNC Symbol;Acc:HGNC:11014]	2	27253684	27275817	p23.3	-1
ENSG00000179841	145.514	-0.549303	0.135892	-4.0422	5.29523e-05	0.003181	down	AKAP5	A-kinase anchoring protein 5 [Source:HGNC Symbol;Acc:HGNC:375]	14	64465499	64474503	q23.3	1
ENSG00000088305	132.757	-0.571773	0.141645	-4.03667	5.42149e-05	0.00324	down	DNMT3B	DNA methyltransferase 3 beta [Source:HGNC Symbol;Acc:HGNC:2979]	20	32762385	32809356	q11.21	1
ENSG00000184371	55209.6	0.243009	0.0602514	4.03326	5.50081e-05	0.003271	up	CSF1	colony stimulating factor 1 [Source:HGNC Symbol;Acc:HGNC:2432]	1	109910242	109930992	p13.3	1
ENSG00000165915	1950.29	0.214919	0.0533659	4.02726	5.64304e-05	0.00333	up	SLC39A13	solute carrier family 39 member 13 [Source:HGNC Symbol;Acc:HGNC:20859]	11	47407132	47416496	p11.2	1
ENSG00000174032	1114.96	0.17828	0.0442754	4.02662	5.65851e-05	0.00333	up	SLC25A30	solute carrier family 25 member 30 [Source:HGNC Symbol;Acc:HGNC:27371]	13	45393316	45418455	q14.13	-1
ENSG00000172548	183.04	0.342075	0.0850882	4.02024	5.81396e-05	0.003404	up	NIPAL4	NIPA like domain containing 4 [Source:HGNC Symbol;Acc:HGNC:28018]	5	157460019	157474717	q33.3	1
ENSG00000005844	2942.65	0.200118	0.0499118	4.00944	6.08624e-05	0.003546	up	ITGAL	integrin subunit alpha L [Source:HGNC Symbol;Acc:HGNC:6148]	16	30472719	30523185	p11.2	1
ENSG00000103066	4433.68	0.169955	0.0424701	4.00176	6.28721e-05	0.003644	up	PLA2G15	phospholipase A2 group XV [Source:HGNC Symbol;Acc:HGNC:17163]	16	68245304	68261058	q22.1	1
ENSG00000131238	46927.4	-0.140129	0.0350529	-3.99765	6.39737e-05	0.00369	down	PPT1	palmitoyl-protein thioesterase 1 [Source:HGNC Symbol;Acc:HGNC:9325]	1	40071461	40097727	p34.2	-1
ENSG00000141506	2395.35	0.163316	0.0408692	3.99607	6.4404e-05	0.003696	up	PIK3R5	phosphoinositide-3-kinase regulatory subunit 5 [Source:HGNC Symbol;Acc:HGNC:30035]	17	8878911	8965712	p13.1	-1
ENSG00000143537	3736.64	-0.151402	0.0379011	-3.99467	6.47841e-05	0.003699	down	ADAM15	ADAM metallopeptidase domain 15 [Source:HGNC Symbol;Acc:HGNC:193]	1	155050566	155062775	q21.3	1
ENSG00000167779	87.9719	-0.620318	0.156662	-3.95959	7.50783e-05	0.004266	down	IGFBP6	insulin like growth factor binding protein 6 [Source:HGNC Symbol;Acc:HGNC:5475]	12	53097436	53102345	q13.13	1
ENSG00000228486	856.452	-0.348133	0.0879884	-3.95657	7.60332e-05	0.004299	down	C2orf92	chromosome 2 open reading frame 92 [Source:HGNC Symbol;Acc:HGNC:49272]	2	97664217	97703064	q11.2	1
ENSG00000163050	1084.47	-0.190732	0.0483262	-3.94676	7.92173e-05	0.004457	down	COQ8A	coenzyme Q8A [Source:HGNC Symbol;Acc:HGNC:16812]	1	226897536	226987545	q42.13	1
ENSG00000129675	1403.8	-0.20937	0.0531407	-3.93992	8.15101e-05	0.004564	down	ARHGEF6	Rac/Cdc42 guanine nucleotide exchange factor 6 [Source:HGNC Symbol;Acc:HGNC:685]	X	136665547	136780932	q26.3	-1
ENSG00000090861	3136.92	0.186863	0.0474541	3.93776	8.22456e-05	0.004583	up	AARS	alanyl-tRNA synthetase [Source:HGNC Symbol;Acc:HGNC:20]	16	70252295	70289543	q22.1	-1
ENSG00000073111	981.13	-0.230945	0.0586775	-3.93584	8.29078e-05	0.004598	down	MCM2	minichromosome maintenance complex component 2 [Source:HGNC Symbol;Acc:HGNC:6944]	3	127598410	127622436	q21.3	1
ENSG00000073849	3242.03	-0.176503	0.0449878	-3.92335	8.73279e-05	0.00482	down	ST6GAL1	ST6 beta-galactoside alpha-2,6-sialyltransferase 1 [Source:HGNC Symbol;Acc:HGNC:10860]	3	186930502	187078553	q27.3	1
ENSG00000135596	6875.78	-0.171742	0.0438651	-3.91522	9.03205e-05	0.004961	down	MICAL1	microtubule associated monooxygenase, calponin and LIM domain containing 1 [Source:HGNC Symbol;Acc:HGNC:20619]	6	109444062	109465968	q21	-1
ENSG00000126067	2797	0.145811	0.0372689	3.91239	9.13855e-05	0.004996	up	PSMB2	proteasome subunit beta 2 [Source:HGNC Symbol;Acc:HGNC:9539]	1	35599541	35641526	p34.3	-1
ENSG00000137225	316.812	-0.432117	0.11051	-3.91021	9.22149e-05	0.005017	down	CAPN11	calpain 11 [Source:HGNC Symbol;Acc:HGNC:1478]	6	44158811	44184401	p21.1	1
ENSG00000012822	3315.89	-0.187431	0.0479715	-3.90715	9.33928e-05	0.005058	down	CALCOCO1	calcium binding and coiled-coil domain 1 [Source:HGNC Symbol;Acc:HGNC:29306]	12	53708517	53727745	q13.13	-1
ENSG00000119514	3461.07	-0.139098	0.035651	-3.90166	9.55339e-05	0.005149	down	GALNT12	polypeptide N-acetylgalactosaminyltransferase 12 [Source:HGNC Symbol;Acc:HGNC:19877]	9	98807670	98850081	q22.33	1
ENSG00000162383	234.006	-0.413643	0.106301	-3.89123	9.97367e-05	0.005351	down	SLC1A7	solute carrier family 1 member 7 [Source:HGNC Symbol;Acc:HGNC:10945]	1	53087179	53142632	p32.3	-1
ENSG00000079785	1638.15	0.15057	0.038804	3.88027	0.00010434	0.005546	up	DDX1	DEAD-box helicase 1 [Source:HGNC Symbol;Acc:HGNC:2734]	2	15591178	15631111	p24.3	1
ENSG00000157326	700.788	-0.20763	0.0535087	-3.8803	0.000104326	0.005546	down	DHRS4	dehydrogenase/reductase 4 [Source:HGNC Symbol;Acc:HGNC:16985]	14	23953734	23969279	q11.2	1
ENSG00000095002	655.625	-0.239002	0.0616331	-3.87782	0.000105398	0.005551	down	MSH2	mutS homolog 2 [Source:HGNC Symbol;Acc:HGNC:7325]	2	47402969	47663146	p21	1
ENSG00000248360	485.216	0.325574	0.0839535	3.87802	0.000105309	0.005551	up	LINC00504	long intergenic non-protein coding RNA 504 [Source:HGNC Symbol;Acc:HGNC:43555]	4	14470465	14888169	p15.33	-1
ENSG00000088682	1470.23	-0.162234	0.0420851	-3.85489	0.00011578	0.006069	down	COQ9	coenzyme Q9 [Source:HGNC Symbol;Acc:HGNC:25302]	16	57447425	57461270	q21	1
ENSG00000133142	637.602	-0.295664	0.0767263	-3.85349	0.000116444	0.006069	down	TCEAL4	transcription elongation factor A like 4 [Source:HGNC Symbol;Acc:HGNC:26121]	X	103576231	103587736	q22.2	1
ENSG00000143224	122.415	-0.449817	0.116752	-3.85275	0.000116797	0.006069	down	PPOX	protoporphyrinogen oxidase [Source:HGNC Symbol;Acc:HGNC:9280]	1	161166056	161178013	q23.3	1
ENSG00000058866	160.037	0.379747	0.0988051	3.8434	0.000121343	0.006251	up	DGKG	diacylglycerol kinase gamma [Source:HGNC Symbol;Acc:HGNC:2853]	3	186105668	186362234	q27.3	-1
ENSG00000127586	182.529	-0.546012	0.142069	-3.8433	0.00012139	0.006251	down	CHTF18	chromosome transmission fidelity factor 18 [Source:HGNC Symbol;Acc:HGNC:18435]	16	788046	800737	p13.3	1
ENSG00000106034	338.138	-0.390435	0.101713	-3.83858	0.000123746	0.006344	down	CPED1	cadherin like and PC-esterase domain containing 1 [Source:HGNC Symbol;Acc:HGNC:26159]	7	120988697	121297442	q31.31	1
ENSG00000232453	315.271	0.288912	0.0753296	3.8353	0.000125411	0.006401	up	LINC02777	long intergenic non-protein coding RNA 2777 [Source:HGNC Symbol;Acc:HGNC:54297]	1	58882868	58931897	p32.1	-1
ENSG00000173868	159.467	-0.555167	0.144832	-3.83317	0.0001265	0.006428	down	PHOSPHO1	phosphoethanolamine/phosphocholine phosphatase [Source:HGNC Symbol;Acc:HGNC:16815]	17	49223362	49230766	q21.32	-1
ENSG00000154814	397.499	-0.29561	0.0771657	-3.83085	0.000127703	0.006461	down	OXNAD1	oxidoreductase NAD binding domain containing 1 [Source:HGNC Symbol;Acc:HGNC:25128]	3	16265160	16350299	p25.1	1
ENSG00000156802	681.483	-0.234681	0.0612851	-3.82932	0.000128496	0.006472	down	ATAD2	ATPase family AAA domain containing 2 [Source:HGNC Symbol;Acc:HGNC:30123]	8	123319850	123416350	q24.13	-1
ENSG00000136824	778.862	-0.219723	0.0574257	-3.82621	0.000130133	0.006526	down	SMC2	structural maintenance of chromosomes 2 [Source:HGNC Symbol;Acc:HGNC:14011]	9	104094260	104141419	q31.1	1
ENSG00000007968	171.928	-0.590972	0.154738	-3.81917	0.000133902	0.006686	down	E2F2	E2F transcription factor 2 [Source:HGNC Symbol;Acc:HGNC:3114]	1	23506438	23531233	p36.12	-1
ENSG00000164649	354.063	-0.322699	0.0846683	-3.81133	0.000138222	0.006869	down	CDCA7L	cell division cycle associated 7 like [Source:HGNC Symbol;Acc:HGNC:30777]	7	21900899	21945903	p15.3	-1
ENSG00000173692	4068.83	0.126942	0.0333147	3.81039	0.000138747	0.006869	up	PSMD1	proteasome 26S subunit, non-ATPase 1 [Source:HGNC Symbol;Acc:HGNC:9554]	2	231056864	231172827	q37.1	1
ENSG00000146670	207.51	-0.458503	0.120364	-3.8093	0.000139363	0.00687	down	CDCA5	cell division cycle associated 5 [Source:HGNC Symbol;Acc:HGNC:14626]	11	65066300	65084164	q13.1	-1
ENSG00000062822	1387.54	-0.246198	0.0646501	-3.80816	0.000140003	0.006872	down	POLD1	DNA polymerase delta 1, catalytic subunit [Source:HGNC Symbol;Acc:HGNC:9175]	19	50384204	50418018	q13.33	1
ENSG00000179218	32600.3	0.166498	0.0437801	3.80306	0.00014292	0.006986	up	CALR	calreticulin [Source:HGNC Symbol;Acc:HGNC:1455]	19	12938578	12944489	p13.13	1
ENSG00000008130	4207.93	-0.153133	0.0403744	-3.79282	0.000148947	0.007219	down	NADK	NAD kinase [Source:HGNC Symbol;Acc:HGNC:29831]	1	1751232	1780457	p36.33	-1
ENSG00000109814	909.17	0.204687	0.0539598	3.79332	0.000148647	0.007219	up	UGDH	UDP-glucose 6-dehydrogenase [Source:HGNC Symbol;Acc:HGNC:12525]	4	39498755	39528311	p14	-1
ENSG00000176788	2844.96	-0.341867	0.0902098	-3.78969	0.000150834	0.00728	down	BASP1	brain abundant membrane attached signal protein 1 [Source:HGNC Symbol;Acc:HGNC:957]	5	17065598	17276843	p15.1	1
ENSG00000119900	4086.57	0.262521	0.069313	3.78747	0.000152189	0.007315	up	OGFRL1	opioid growth factor receptor like 1 [Source:HGNC Symbol;Acc:HGNC:21378]	6	71288811	71309059	q13	1
ENSG00000122122	5047.72	-0.118932	0.0314303	-3.78399	0.000154333	0.007387	down	SASH3	SAM and SH3 domain containing 3 [Source:HGNC Symbol;Acc:HGNC:15975]	X	129779949	129795201	q26.1	1
ENSG00000100055	7993.39	-0.0981263	0.0259446	-3.78215	0.000155482	0.007411	down	CYTH4	cytohesin 4 [Source:HGNC Symbol;Acc:HGNC:9505]	22	37282027	37315341	q13.1	1
ENSG00000101782	2920.85	0.122696	0.0325343	3.77127	0.00016242	0.007586	up	RIOK3	RIO kinase 3 [Source:HGNC Symbol;Acc:HGNC:11451]	18	23453287	23486603	q11.2	1
ENSG00000102158	2610.56	0.235292	0.0623614	3.77304	0.00016127	0.007586	up	MAGT1	magnesium transporter 1 [Source:HGNC Symbol;Acc:HGNC:28880]	X	77826364	77895593	q21.1	-1
ENSG00000114646	94.5339	-0.59992	0.158952	-3.77422	0.000160506	0.007586	down	CSPG5	chondroitin sulfate proteoglycan 5 [Source:HGNC Symbol;Acc:HGNC:2467]	3	47562238	47580792	p21.31	-1
ENSG00000182446	4194.65	0.130413	0.0345614	3.77338	0.000161054	0.007586	up	NPLOC4	NPL4 homolog, ubiquitin recognition factor [Source:HGNC Symbol;Acc:HGNC:18261]	17	81556887	81648465	q25.3	-1
ENSG00000196177	951.336	-0.198099	0.0525288	-3.77125	0.000162434	0.007586	down	ACADSB	acyl-CoA dehydrogenase short/branched chain [Source:HGNC Symbol;Acc:HGNC:91]	10	123008979	123058311	q26.13	1
ENSG00000114480	1524.51	0.164748	0.0439158	3.75146	0.000175809	0.008177	up	GBE1	1,4-alpha-glucan branching enzyme 1 [Source:HGNC Symbol;Acc:HGNC:4180]	3	81489703	81761645	p12.2	-1
ENSG00000198743	2639.64	0.2635	0.0702953	3.74847	0.000177915	0.008242	up	SLC5A3	solute carrier family 5 member 3 [Source:HGNC Symbol;Acc:HGNC:11038]	21	34073578	34106260	q22.11	1
ENSG00000122861	705.159	0.225232	0.0601378	3.74527	0.000180203	0.008285	up	PLAU	plasminogen activator, urokinase [Source:HGNC Symbol;Acc:HGNC:9052]	10	73909177	73917496	q22.2	1
ENSG00000155304	508.206	0.315372	0.0842082	3.74515	0.000180286	0.008285	up	HSPA13	heat shock protein family A (Hsp70) member 13 [Source:HGNC Symbol;Acc:HGNC:11375]	21	14371115	14383484	q11.2	-1
ENSG00000119457	48.2177	-0.771939	0.20631	-3.74165	0.000182815	0.008335	down	SLC46A2	solute carrier family 46 member 2 [Source:HGNC Symbol;Acc:HGNC:16055]	9	112878920	112890876	q32	-1
ENSG00000173482	944.378	-0.179781	0.0480412	-3.74222	0.000182403	0.008335	down	PTPRM	protein tyrosine phosphatase receptor type M [Source:HGNC Symbol;Acc:HGNC:9675]	18	7566782	8406861	p11.23	1
ENSG00000164506	771.755	0.230113	0.0616972	3.72971	0.000191702	0.008706	up	STXBP5	syntaxin binding protein 5 [Source:HGNC Symbol;Acc:HGNC:19665]	6	147204425	147390476	q24.3	1
ENSG00000076248	1043.52	-0.196333	0.0527133	-3.72455	0.000195662	0.008851	down	UNG	uracil DNA glycosylase [Source:HGNC Symbol;Acc:HGNC:12572]	12	109097574	109110992	q24.11	1
ENSG00000112039	1829.14	-0.162782	0.0437371	-3.72184	0.000197777	0.008877	down	FANCE	FA complementation group E [Source:HGNC Symbol;Acc:HGNC:3586]	6	35452356	35467103	p21.31	1
ENSG00000136868	8472.48	-0.148272	0.0398379	-3.7219	0.00019773	0.008877	down	SLC31A1	solute carrier family 31 member 1 [Source:HGNC Symbol;Acc:HGNC:11016]	9	113221544	113264492	q32	1
ENSG00000204520	294.39	0.273192	0.0734725	3.71828	0.00020058	0.008968	up	MICA	MHC class I polypeptide-related sequence A [Source:HGNC Symbol;Acc:HGNC:7090]	6	31399784	31415315	p21.33	1
ENSG00000108932	475.419	0.275589	0.0741601	3.71614	0.000202288	0.009009	up	SLC16A6	solute carrier family 16 member 6 [Source:HGNC Symbol;Acc:HGNC:10927]	17	68267026	68291267	q24.2	-1
ENSG00000138623	6329.14	-0.130932	0.0353785	-3.70088	0.000214855	0.009532	down	SEMA7A	semaphorin 7A (John Milton Hagen blood group) [Source:HGNC Symbol;Acc:HGNC:10741]	15	74409289	74433958	q24.1	-1
ENSG00000070669	158.387	0.452891	0.122617	3.69353	0.000221161	0.009774	up	ASNS	asparagine synthetase (glutamine-hydrolyzing) [Source:HGNC Symbol;Acc:HGNC:753]	7	97851677	97872542	q21.3	-1
ENSG00000157657	1088.21	-0.197267	0.0534956	-3.68754	0.000226433	0.009969	down	ZNF618	zinc finger protein 618 [Source:HGNC Symbol;Acc:HGNC:29416]	9	113876282	114056591	q32	1
ENSG00000166575	505.167	0.219131	0.0594835	3.6839	0.000229692	0.01007	up	TMEM135	transmembrane protein 135 [Source:HGNC Symbol;Acc:HGNC:26167]	11	87037844	87328824	q14.2	1
ENSG00000176986	2275.94	0.141302	0.0383844	3.68124	0.000232104	0.01014	up	SEC24C	SEC24 homolog C, COPII coat complex component [Source:HGNC Symbol;Acc:HGNC:10705]	10	73744372	73772161	q22.2	1
ENSG00000178537	1102.81	-0.178335	0.048457	-3.68028	0.00023298	0.01014	down	SLC25A20	solute carrier family 25 member 20 [Source:HGNC Symbol;Acc:HGNC:1421]	3	48856926	48898904	p21.31	-1
ENSG00000183023	2641.89	-0.247391	0.0672564	-3.67833	0.000234762	0.01018	down	SLC8A1	solute carrier family 8 member A1 [Source:HGNC Symbol;Acc:HGNC:11068]	2	40097270	40611053	p22.1	-1
ENSG00000214013	583.388	-0.213023	0.0579372	-3.67679	0.000236187	0.0102	down	GANC	glucosidase alpha, neutral C [Source:HGNC Symbol;Acc:HGNC:4139]	15	42273233	42356935	q15.1	1
ENSG00000089060	4262.22	-0.129545	0.0352786	-3.67206	0.000240602	0.01023	down	SLC8B1	solute carrier family 8 member B1 [Source:HGNC Symbol;Acc:HGNC:26175]	12	113298759	113359493	q24.13	-1
ENSG00000138311	384.527	-0.319748	0.0870745	-3.67212	0.00024055	0.01023	down	ZNF365	zinc finger protein 365 [Source:HGNC Symbol;Acc:HGNC:18194]	10	62374192	62670301	q21.2	1
ENSG00000143786	2002.23	-0.161211	0.0438683	-3.6749	0.000237943	0.01023	down	CNIH3	cornichon family AMPA receptor auxiliary protein 3 [Source:HGNC Symbol;Acc:HGNC:26802]	1	224434660	224740554	q42.12	1
ENSG00000161267	947.351	-0.214092	0.0583152	-3.67129	0.000241331	0.01023	down	BDH1	3-hydroxybutyrate dehydrogenase 1 [Source:HGNC Symbol;Acc:HGNC:1027]	3	197509783	197573323	q29	-1
ENSG00000163513	6241.41	-0.171881	0.0467992	-3.67272	0.000239978	0.01023	down	TGFBR2	transforming growth factor beta receptor 2 [Source:HGNC Symbol;Acc:HGNC:11773]	3	30606502	30694142	p24.1	1
ENSG00000198585	1108.4	-0.164373	0.0448007	-3.66899	0.000243511	0.01029	down	NUDT16	nudix hydrolase 16 [Source:HGNC Symbol;Acc:HGNC:26442]	3	131381671	131388830	q22.1	1
ENSG00000140379	8531.03	-0.213371	0.0582022	-3.66603	0.000246343	0.01033	down	BCL2A1	BCL2 related protein A1 [Source:HGNC Symbol;Acc:HGNC:991]	15	79960892	79971196	q25.1	-1
ENSG00000248323	129.882	0.40659	0.110891	3.66659	0.000245807	0.01033	up	LUCAT1	lung cancer associated transcript 1 [Source:HGNC Symbol;Acc:HGNC:48498]	5	91054834	91314547	q14.3	-1
ENSG00000169403	4333.36	-0.185556	0.050639	-3.66429	0.000248028	0.01037	down	PTAFR	platelet activating factor receptor [Source:HGNC Symbol;Acc:HGNC:9582]	1	28147166	28193936	p35.3	-1
ENSG00000134278	1464.44	0.144675	0.0395271	3.66015	0.000252063	0.0105	up	SPIRE1	spire type actin nucleation factor 1 [Source:HGNC Symbol;Acc:HGNC:30622]	18	12446512	12658134	p11.21	-1
ENSG00000086598	3757.51	0.203797	0.0557164	3.65776	0.000254431	0.01052	up	TMED2	transmembrane p24 trafficking protein 2 [Source:HGNC Symbol;Acc:HGNC:16996]	12	123584533	123598582	q24.31	1
ENSG00000088179	160.138	0.405905	0.110958	3.65817	0.000254021	0.01052	up	PTPN4	protein tyrosine phosphatase non-receptor type 4 [Source:HGNC Symbol;Acc:HGNC:9656]	2	119759922	119984899	q14.2	1
ENSG00000054392	597.115	-0.223694	0.0612237	-3.65372	0.000258466	0.01062	down	HHAT	hedgehog acyltransferase [Source:HGNC Symbol;Acc:HGNC:18270]	1	210328252	210676296	q32.2	1
ENSG00000167004	7166.32	0.203254	0.055634	3.65342	0.000258773	0.01062	up	PDIA3	protein disulfide isomerase family A member 3 [Source:HGNC Symbol;Acc:HGNC:4606]	15	43746410	43773278	q15.3	1
ENSG00000138640	517.093	0.255617	0.0700775	3.64762	0.000264676	0.01083	up	FAM13A	family with sequence similarity 13 member A [Source:HGNC Symbol;Acc:HGNC:19367]	4	88725955	89111398	q22.1	-1
ENSG00000063127	163.817	-0.393385	0.108029	-3.64147	0.00027109	0.01101	down	SLC6A16	solute carrier family 6 member 16 [Source:HGNC Symbol;Acc:HGNC:13622]	19	49289638	49325215	q13.33	-1
ENSG00000101310	3613.86	0.132269	0.0363181	3.64196	0.000270573	0.01101	up	SEC23B	SEC23 homolog B, coat complex II component [Source:HGNC Symbol;Acc:HGNC:10702]	20	18507520	18561415	p11.23	1
ENSG00000158220	62.7033	0.587595	0.161559	3.63703	0.000275795	0.01116	up	ESYT3	extended synaptotagmin 3 [Source:HGNC Symbol;Acc:HGNC:24295]	3	138434586	138481686	q22.3	1
ENSG00000165264	1788.46	-0.293228	0.0806532	-3.63567	0.000277264	0.01118	down	NDUFB6	NADH:ubiquinone oxidoreductase subunit B6 [Source:HGNC Symbol;Acc:HGNC:7701]	9	32553001	32573184	p21.1	-1
ENSG00000103051	1840.38	-0.132834	0.0365882	-3.63052	0.000282848	0.01129	down	COG4	component of oligomeric golgi complex 4 [Source:HGNC Symbol;Acc:HGNC:18620]	16	70480568	70523558	q22.1	-1
ENSG00000160179	1236.51	0.263952	0.0726912	3.63115	0.000282164	0.01129	up	ABCG1	ATP binding cassette subfamily G member 1 [Source:HGNC Symbol;Acc:HGNC:73]	21	42199689	42297244	q22.3	1
ENSG00000167552	6949.55	0.115867	0.0319009	3.63208	0.000281142	0.01129	up	TUBA1A	tubulin alpha 1a [Source:HGNC Symbol;Acc:HGNC:20766]	12	49184795	49189080	q13.12	-1
ENSG00000084733	5907.57	0.114762	0.0316478	3.62623	0.000287588	0.01144	up	RAB10	RAB10, member RAS oncogene family [Source:HGNC Symbol;Acc:HGNC:9759]	2	26034084	26137454	p23.3	1
ENSG00000189067	21286.5	-0.119431	0.0329767	-3.62168	0.000292697	0.0116	down	LITAF	lipopolysaccharide induced TNF factor [Source:HGNC Symbol;Acc:HGNC:16841]	16	11547722	11636381	p13.13	-1
ENSG00000110665	1176.36	-0.250502	0.0691911	-3.62044	0.000294105	0.01162	down	C11orf21	chromosome 11 open reading frame 21 [Source:HGNC Symbol;Acc:HGNC:13231]	11	2295645	2303049	p15.5	-1
ENSG00000100321	2860.55	-0.193326	0.053413	-3.61946	0.00029522	0.01162	down	SYNGR1	synaptogyrin 1 [Source:HGNC Symbol;Acc:HGNC:11498]	22	39349925	39385575	q13.1	1
ENSG00000102900	1494.72	-0.12969	0.0358575	-3.61682	0.00029825	0.0117	down	NUP93	nucleoporin 93 [Source:HGNC Symbol;Acc:HGNC:28958]	16	56730118	56850286	q13	1
ENSG00000168374	3167.56	0.153579	0.0424745	3.6158	0.000299427	0.01171	up	ARF4	ADP ribosylation factor 4 [Source:HGNC Symbol;Acc:HGNC:655]	3	57571363	57598220	p14.3	-1
ENSG00000135069	182.459	0.459987	0.127289	3.61372	0.00030184	0.01176	up	PSAT1	phosphoserine aminotransferase 1 [Source:HGNC Symbol;Acc:HGNC:19129]	9	78297125	78330093	q21.2	1
ENSG00000114841	627.625	0.395688	0.109593	3.61052	0.000305583	0.01187	up	DNAH1	dynein axonemal heavy chain 1 [Source:HGNC Symbol;Acc:HGNC:2940]	3	52316319	52400491	p21.1	1
ENSG00000112118	1489.88	-0.189895	0.0526696	-3.6054	0.000311667	0.01206	down	MCM3	minichromosome maintenance complex component 3 [Source:HGNC Symbol;Acc:HGNC:6945]	6	52264014	52284881	p12.2	-1
ENSG00000100342	1022.17	0.210082	0.0582993	3.60351	0.00031395	0.01211	up	APOL1	apolipoprotein L1 [Source:HGNC Symbol;Acc:HGNC:618]	22	36253010	36267530	q12.3	1
ENSG00000183019	365.391	-0.370106	0.10273	-3.60269	0.000314938	0.01211	down	MCEMP1	mast cell expressed membrane protein 1 [Source:HGNC Symbol;Acc:HGNC:27291]	19	7676628	7679826	p13.2	1
ENSG00000160194	1358.25	-0.13487	0.0374463	-3.6017	0.000316139	0.01212	down	NDUFV3	NADH:ubiquinone oxidoreductase subunit V3 [Source:HGNC Symbol;Acc:HGNC:7719]	21	42879644	42913304	q22.3	1
ENSG00000154330	103.137	-0.521009	0.145158	-3.58927	0.000331607	0.01262	down	PGM5	phosphoglucomutase 5 [Source:HGNC Symbol;Acc:HGNC:8908]	9	68328308	68531061	q21.11	1
ENSG00000198829	4134.44	0.179787	0.0500899	3.58928	0.000331594	0.01262	up	SUCNR1	succinate receptor 1 [Source:HGNC Symbol;Acc:HGNC:4542]	3	151873643	151884619	q25.1	1
ENSG00000135052	387.854	-0.25371	0.0707783	-3.58457	0.000337637	0.01277	down	GOLM1	golgi membrane protein 1 [Source:HGNC Symbol;Acc:HGNC:15451]	9	86026146	86100173	q21.33	-1
ENSG00000260630	135.821	0.406207	0.11332	3.58461	0.000337581	0.01277	up	SNAI3-AS1	SNAI3 antisense RNA 1 [Source:HGNC Symbol;Acc:HGNC:28327]	16	88663298	88687278	q24.2	1
ENSG00000136720	1804.48	-0.181335	0.0506226	-3.5821	0.00034084	0.01285	down	HS6ST1	heparan sulfate 6-O-sulfotransferase 1 [Source:HGNC Symbol;Acc:HGNC:5201]	2	128236716	128318868	q14.3	-1
ENSG00000147536	200.234	-0.401882	0.112283	-3.57919	0.000344659	0.01295	down	GINS4	GINS complex subunit 4 [Source:HGNC Symbol;Acc:HGNC:28226]	8	41529218	41545030	p11.21	1
ENSG00000020129	525.103	0.239865	0.0670521	3.57729	0.000347169	0.013	up	NCDN	neurochondrin [Source:HGNC Symbol;Acc:HGNC:17597]	1	35557473	35567274	p34.3	1
ENSG00000139687	1112.2	0.185794	0.051963	3.57551	0.000349551	0.01305	up	RB1	RB transcriptional corepressor 1 [Source:HGNC Symbol;Acc:HGNC:9884]	13	48303726	48599436	q14.2	1
ENSG00000132429	48.7752	-0.540039	0.151177	-3.57223	0.00035395	0.01315	down	POPDC3	popeye domain containing 3 [Source:HGNC Symbol;Acc:HGNC:17649]	6	105157900	105180014	q21	-1
ENSG00000135049	552.076	0.213402	0.0597736	3.57018	0.000356738	0.01315	up	AGTPBP1	ATP/GTP binding protein 1 [Source:HGNC Symbol;Acc:HGNC:17258]	9	85546539	85742029	q21.33	-1
ENSG00000143842	426.311	0.288998	0.0809372	3.57064	0.000356104	0.01315	up	SOX13	SRY-box transcription factor 13 [Source:HGNC Symbol;Acc:HGNC:11192]	1	204073115	204127743	q32.1	1
ENSG00000163902	6979.92	0.157804	0.0442023	3.57005	0.000356915	0.01315	up	RPN1	ribophorin I [Source:HGNC Symbol;Acc:HGNC:10381]	3	128619969	128681075	q21.3	-1
ENSG00000132965	9672.28	-0.192256	0.0538924	-3.56741	0.000360534	0.01324	down	ALOX5AP	arachidonate 5-lipoxygenase activating protein [Source:HGNC Symbol;Acc:HGNC:436]	13	30713478	30764426	q12.3	1
ENSG00000198223	387.364	0.293059	0.0822204	3.56431	0.000364812	0.01336	up	CSF2RA	colony stimulating factor 2 receptor alpha subunit [Source:HGNC Symbol;Acc:HGNC:2435]	X	1268800	1310381	p22.33	1
ENSG00000169710	3544.84	0.305004	0.0856171	3.56242	0.000367454	0.01341	up	FASN	fatty acid synthase [Source:HGNC Symbol;Acc:HGNC:3594]	17	82078338	82098294	q25.3	-1
ENSG00000010256	6138.38	-0.116127	0.0326235	-3.55962	0.000371398	0.01351	down	UQCRC1	ubiquinol-cytochrome c reductase core protein 1 [Source:HGNC Symbol;Acc:HGNC:12585]	3	48599002	48610976	p21.31	-1
ENSG00000058056	266.778	-0.302703	0.0852232	-3.55189	0.000382479	0.01387	down	USP13	ubiquitin specific peptidase 13 [Source:HGNC Symbol;Acc:HGNC:12611]	3	179653040	179789401	q26.33	1
ENSG00000100852	885.951	0.230861	0.0652789	3.53653	0.000405422	0.01466	up	ARHGAP5	Rho GTPase activating protein 5 [Source:HGNC Symbol;Acc:HGNC:675]	14	32076114	32159728	q12	1
ENSG00000133195	3362.33	-0.142717	0.0404439	-3.52876	0.000417507	0.01505	down	SLC39A11	solute carrier family 39 member 11 [Source:HGNC Symbol;Acc:HGNC:14463]	17	72645949	73092712	q25.1	-1
ENSG00000102879	1139.88	-0.250414	0.0710273	-3.5256	0.000422524	0.01518	down	CORO1A	coronin 1A [Source:HGNC Symbol;Acc:HGNC:2252]	16	30182827	30189076	p11.2	1
ENSG00000102870	488.26	0.2273	0.0645347	3.52214	0.000428085	0.01524	up	ZNF629	zinc finger protein 629 [Source:HGNC Symbol;Acc:HGNC:29008]	16	30778456	30787205	p11.2	-1
ENSG00000145685	8837.18	0.160619	0.0456015	3.52222	0.000427943	0.01524	up	LHFPL2	LHFPL tetraspan subfamily member 2 [Source:HGNC Symbol;Acc:HGNC:6588]	5	78485215	78770021	q14.1	-1
ENSG00000150337	859.03	-0.216176	0.0613665	-3.52271	0.000427163	0.01524	down	FCGR1A	Fc fragment of IgG receptor Ia [Source:HGNC Symbol;Acc:HGNC:3613]	1	149782671	149792518	q21.2	1
ENSG00000105011	281.854	-0.38939	0.110936	-3.51004	0.000448037	0.0159	down	ASF1B	anti-silencing function 1B histone chaperone [Source:HGNC Symbol;Acc:HGNC:20996]	19	14119512	14136613	p13.12	-1
ENSG00000259225	762.227	-0.346378	0.098975	-3.49965	0.000465868	0.01648	down	LINC02345	long intergenic non-protein coding RNA 2345 [Source:HGNC Symbol;Acc:HGNC:53267]	15	37980676	38062340	q14	1
ENSG00000117868	2347.03	0.114817	0.0328274	3.49759	0.000469477	0.01651	up	ESYT2	extended synaptotagmin 2 [Source:HGNC Symbol;Acc:HGNC:22211]	7	158730995	158830253	q36.3	-1
ENSG00000167701	133.437	-0.487528	0.139369	-3.4981	0.000468593	0.01651	down	GPT	glutamic--pyruvic transaminase [Source:HGNC Symbol;Acc:HGNC:4552]	8	144502973	144507174	q24.3	1
ENSG00000074416	15929.5	-0.12449	0.0357209	-3.48506	0.000492023	0.01725	down	MGLL	monoglyceride lipase [Source:HGNC Symbol;Acc:HGNC:17038]	3	127689062	128052190	q21.3	-1
ENSG00000173846	2277.11	0.255029	0.0732393	3.48213	0.000497444	0.01739	up	PLK3	polo like kinase 3 [Source:HGNC Symbol;Acc:HGNC:2154]	1	44800377	44805990	p34.1	1
ENSG00000092203	1701.9	0.110831	0.0318618	3.47849	0.000504252	0.01757	up	TOX4	TOX high mobility group box family member 4 [Source:HGNC Symbol;Acc:HGNC:20161]	14	21476597	21499175	q11.2	1
ENSG00000167280	934.931	-0.246226	0.0710198	-3.467	0.0005263	0.01829	down	ENGASE	endo-beta-N-acetylglucosaminidase [Source:HGNC Symbol;Acc:HGNC:24622]	17	79074939	79088599	q25.3	1
ENSG00000112294	1384.56	-0.164488	0.0474631	-3.4656	0.000529051	0.01833	down	ALDH5A1	aldehyde dehydrogenase 5 family member A1 [Source:HGNC Symbol;Acc:HGNC:408]	6	24494867	24537207	p22.3	1
ENSG00000012660	4301.07	0.139536	0.040368	3.4566	0.000547044	0.01889	up	ELOVL5	ELOVL fatty acid elongase 5 [Source:HGNC Symbol;Acc:HGNC:21308]	6	53267398	53349179	p12.1	-1
ENSG00000137478	843.641	-0.179362	0.0519634	-3.45169	0.000557084	0.01918	down	FCHSD2	FCH and double SH3 domains 2 [Source:HGNC Symbol;Acc:HGNC:29114]	11	72836745	73142318	q13.4	-1
ENSG00000119777	1980.78	0.18755	0.054365	3.44982	0.000560962	0.01926	up	TMEM214	transmembrane protein 214 [Source:HGNC Symbol;Acc:HGNC:25983]	2	27032910	27041694	p23.3	1
ENSG00000171204	819.31	-0.222005	0.064389	-3.44788	0.000565012	0.01931	down	TMEM126B	transmembrane protein 126B [Source:HGNC Symbol;Acc:HGNC:30883]	11	85628573	85636539	q14.1	1
ENSG00000186283	2658.25	-0.197176	0.0571946	-3.44747	0.000565869	0.01931	down	TOR3A	torsin family 3 member A [Source:HGNC Symbol;Acc:HGNC:11997]	1	179082070	179098023	q25.2	1
ENSG00000175356	133.108	-0.474308	0.137663	-3.44543	0.000570159	0.01934	down	SCUBE2	signal peptide, CUB domain and EGF like domain containing 2 [Source:HGNC Symbol;Acc:HGNC:30425]	11	9019498	9138114	p15.4	-1
ENSG00000182149	3592.97	-0.106648	0.030953	-3.44549	0.000570031	0.01934	down	IST1	IST1 factor associated with ESCRT-III [Source:HGNC Symbol;Acc:HGNC:28977]	16	71845996	71931199	q22.2	1
ENSG00000160298	76.8928	-0.64462	0.18732	-3.44127	0.00057898	0.01954	down	C21orf58	chromosome 21 open reading frame 58 [Source:HGNC Symbol;Acc:HGNC:1300]	21	46300181	46323875	q22.3	-1
ENSG00000173320	174.224	0.3437	0.0998823	3.44104	0.000579474	0.01954	up	STOX2	storkhead box 2 [Source:HGNC Symbol;Acc:HGNC:25450]	4	183797692	184023526	q35.1	1
ENSG00000261505	105.549	0.442089	0.128513	3.44003	0.000581658	0.01956	up		novel transcript, antisense to UBE2I	16	1317891	1322845	p13.3	-1
ENSG00000177706	5994.17	0.211934	0.061634	3.43859	0.000584759	0.01961	up	FAM20C	FAM20C golgi associated secretory pathway kinase [Source:HGNC Symbol;Acc:HGNC:22140]	7	192571	260772	p22.3	1
ENSG00000025039	3086.63	-0.152871	0.0445445	-3.43188	0.000599408	0.02004	down	RRAGD	Ras related GTP binding D [Source:HGNC Symbol;Acc:HGNC:19903]	6	89364616	89412273	q15	-1
ENSG00000124357	4923.71	-0.199195	0.0580613	-3.43076	0.000601884	0.02007	down	NAGK	N-acetylglucosamine kinase [Source:HGNC Symbol;Acc:HGNC:17174]	2	71064344	71079808	p13.3	1
ENSG00000180113	4323.63	0.219235	0.0640259	3.42416	0.000616693	0.0205	up	TDRD6	tudor domain containing 6 [Source:HGNC Symbol;Acc:HGNC:21339]	6	46687875	46704319	p12.3	1
ENSG00000167208	765.818	-0.219771	0.0642109	-3.42265	0.00062014	0.02056	down	SNX20	sorting nexin 20 [Source:HGNC Symbol;Acc:HGNC:30390]	16	50666300	50681353	q12.1	-1
ENSG00000155465	7241.71	-0.114851	0.0335698	-3.42125	0.000623336	0.0206	down	SLC7A7	solute carrier family 7 member 7 [Source:HGNC Symbol;Acc:HGNC:11065]	14	22773222	22829820	q11.2	-1
ENSG00000106366	1008.5	0.178043	0.052056	3.42022	0.000625711	0.02062	up	SERPINE1	serpin family E member 1 [Source:HGNC Symbol;Acc:HGNC:8583]	7	101127089	101139266	q22.1	1
ENSG00000173276	791.511	0.199003	0.0582272	3.4177	0.000631527	0.0207	up	ZBTB21	zinc finger and BTB domain containing 21 [Source:HGNC Symbol;Acc:HGNC:13083]	21	41986831	42010387	q22.3	-1
ENSG00000196814	447.083	-0.260917	0.0763437	-3.41766	0.000631625	0.0207	down	MVB12B	multivesicular body subunit 12B [Source:HGNC Symbol;Acc:HGNC:23368]	9	126326829	126507041	q33.3	1
ENSG00000171766	387.079	-0.250169	0.073241	-3.4157	0.00063618	0.02079	down	GATM	glycine amidinotransferase [Source:HGNC Symbol;Acc:HGNC:4175]	15	45361124	45402327	q21.1	-1
ENSG00000161544	1304.1	0.264083	0.0773675	3.41336	0.000641667	0.02091	up	CYGB	cytoglobin [Source:HGNC Symbol;Acc:HGNC:16505]	17	76527356	76551175	q25.1	-1
ENSG00000102003	260.131	-0.292714	0.0857898	-3.41199	0.000644906	0.02094	down	SYP	synaptophysin [Source:HGNC Symbol;Acc:HGNC:11506]	X	49187804	49200259	p11.23	-1
ENSG00000134884	1052.28	-0.200138	0.0586677	-3.41138	0.000646347	0.02094	down	ARGLU1	arginine and glutamate rich 1 [Source:HGNC Symbol;Acc:HGNC:25482]	13	106541673	106568137	q33.3	-1
ENSG00000153885	154.707	-0.466871	0.137216	-3.40246	0.000667819	0.02158	down	KCTD15	potassium channel tetramerization domain containing 15 [Source:HGNC Symbol;Acc:HGNC:23297]	19	33795933	33815763	q13.11	1
ENSG00000100219	1773.52	0.256335	0.0754066	3.39937	0.000675418	0.0217	up	XBP1	X-box binding protein 1 [Source:HGNC Symbol;Acc:HGNC:12801]	22	28794555	28800597	q12.1	-1
ENSG00000125249	2834.55	0.214484	0.0630895	3.39968	0.000674643	0.0217	up	RAP2A	RAP2A, member of RAS oncogene family [Source:HGNC Symbol;Acc:HGNC:9861]	13	97434169	97469128	q32.1	1
ENSG00000132182	3969.64	-0.156129	0.0459605	-3.39702	0.000681248	0.02177	down	NUP210	nucleoporin 210 [Source:HGNC Symbol;Acc:HGNC:30052]	3	13316235	13420322	p25.1	-1
ENSG00000198848	4924.69	-0.141567	0.0416679	-3.3975	0.000680034	0.02177	down	CES1	carboxylesterase 1 [Source:HGNC Symbol;Acc:HGNC:1863]	16	55802851	55833337	q12.2	-1
ENSG00000157870	3341.99	-0.199574	0.0588026	-3.39396	0.000688905	0.02195	down	PRXL2B	peroxiredoxin like 2B [Source:HGNC Symbol;Acc:HGNC:28390]	1	2586491	2591469	p36.32	1
ENSG00000143320	17371.8	-0.107644	0.0317483	-3.39055	0.000697535	0.02217	down	CRABP2	cellular retinoic acid binding protein 2 [Source:HGNC Symbol;Acc:HGNC:2339]	1	156699606	156705816	q23.1	-1
ENSG00000075624	181397	-0.223064	0.0658623	-3.38683	0.000707055	0.02234	down	ACTB	actin beta [Source:HGNC Symbol;Acc:HGNC:132]	7	5527148	5563784	p22.1	-1
ENSG00000137509	4157.02	-0.123383	0.0364287	-3.38698	0.000706667	0.02234	down	PRCP	prolylcarboxypeptidase [Source:HGNC Symbol;Acc:HGNC:9344]	11	82822936	82970584	q14.1	-1
ENSG00000065600	677.133	0.184408	0.0545048	3.38334	0.000716105	0.02251	up	PACC1	proton activated chloride channel 1 [Source:HGNC Symbol;Acc:HGNC:25593]	1	212363931	212414901	q32.3	-1
ENSG00000129354	80.2979	-0.51665	0.152706	-3.38329	0.00071623	0.02251	down	AP1M2	adaptor related protein complex 1 subunit mu 2 [Source:HGNC Symbol;Acc:HGNC:558]	19	10572671	10587315	p13.2	-1
ENSG00000106638	834.448	0.179306	0.0530575	3.37946	0.000726288	0.02275	up	TBL2	transducin beta like 2 [Source:HGNC Symbol;Acc:HGNC:11586]	7	73567537	73578791	q11.23	-1
ENSG00000176018	318.597	0.305296	0.0903745	3.37812	0.000729824	0.02275	up	LYSMD3	LysM domain containing 3 [Source:HGNC Symbol;Acc:HGNC:26969]	5	90515611	90529584	q14.3	-1
ENSG00000198853	1410.71	0.178461	0.0528217	3.37856	0.00072867	0.02275	up	RUSC2	RUN and SH3 domain containing 2 [Source:HGNC Symbol;Acc:HGNC:23625]	9	35490111	35561898	p13.3	1
ENSG00000124788	2404.5	0.212138	0.0628213	3.37684	0.000733226	0.0228	up	ATXN1	ataxin 1 [Source:HGNC Symbol;Acc:HGNC:10548]	6	16299112	16761491	p22.3	-1
ENSG00000204054	2837.37	-0.104908	0.0310787	-3.37555	0.000736683	0.02284	down	LINC00963	long intergenic non-protein coding RNA 963 [Source:HGNC Symbol;Acc:HGNC:48716]	9	129476946	129513687	q34.11	1
ENSG00000014257	149.387	-0.371876	0.110195	-3.37471	0.000738927	0.02285	down	ACPP	acid phosphatase, prostate [Source:HGNC Symbol;Acc:HGNC:125]	3	132317369	132368298	q22.1	1
ENSG00000149499	1294.61	-0.196184	0.058145	-3.37404	0.000740733	0.02285	down	EML3	EMAP like 3 [Source:HGNC Symbol;Acc:HGNC:26666]	11	62602218	62612765	q12.3	-1
ENSG00000197405	8791.68	0.157398	0.0467632	3.36585	0.000763089	0.02341	up	C5AR1	complement C5a receptor 1 [Source:HGNC Symbol;Acc:HGNC:1338]	19	47290023	47322066	q13.32	1
ENSG00000213699	1382.96	0.206293	0.0612848	3.36614	0.000762287	0.02341	up	SLC35F6	solute carrier family 35 member F6 [Source:HGNC Symbol;Acc:HGNC:26055]	2	26764284	26781231	p23.3	1
ENSG00000099385	548.804	-0.214186	0.0636989	-3.36248	0.000772456	0.02354	down	BCL7C	BAF chromatin remodeling complex subunit BCL7C [Source:HGNC Symbol;Acc:HGNC:1006]	16	30833626	30894960	p11.2	-1
ENSG00000122694	5432.51	-0.133409	0.039689	-3.36136	0.000775603	0.02354	down	GLIPR2	GLI pathogenesis related 2 [Source:HGNC Symbol;Acc:HGNC:18007]	9	36136536	36163913	p13.3	1
ENSG00000148429	530.04	0.235141	0.06994	3.36204	0.000773698	0.02354	up	USP6NL	USP6 N-terminal like [Source:HGNC Symbol;Acc:HGNC:16858]	10	11453946	11611754	p14	-1
ENSG00000175567	9494.19	0.127541	0.0379267	3.36283	0.000771472	0.02354	up	UCP2	uncoupling protein 2 [Source:HGNC Symbol;Acc:HGNC:12518]	11	73974672	73983246	q13.4	-1
ENSG00000023516	998.024	0.195588	0.0582697	3.3566	0.000789071	0.02389	up	AKAP11	A-kinase anchoring protein 11 [Source:HGNC Symbol;Acc:HGNC:369]	13	42272152	42323261	q14.11	1
ENSG00000145494	1183.45	-0.218043	0.0650223	-3.35335	0.000798387	0.02411	down	NDUFS6	NADH:ubiquinone oxidoreductase subunit S6 [Source:HGNC Symbol;Acc:HGNC:7713]	5	1801400	1816605	p15.33	1
ENSG00000120885	12036	-0.150933	0.0450199	-3.35259	0.000800597	0.02411	down	CLU	clusterin [Source:HGNC Symbol;Acc:HGNC:2095]	8	27596917	27614700	p21.1	-1
ENSG00000100479	51.7052	-0.726344	0.216749	-3.35109	0.000804939	0.02416	down	POLE2	DNA polymerase epsilon 2, accessory subunit [Source:HGNC Symbol;Acc:HGNC:9178]	14	49643555	49688422	q21.3	-1
ENSG00000163297	1278.51	0.157001	0.0468571	3.35064	0.000806244	0.02416	up	ANTXR2	ANTXR cell adhesion molecule 2 [Source:HGNC Symbol;Acc:HGNC:21732]	4	79901146	80125454	q21.21	-1
ENSG00000013573	435.261	-0.231386	0.0691365	-3.3468	0.000817505	0.02437	down	DDX11	DEAD/H-box helicase 11 [Source:HGNC Symbol;Acc:HGNC:2736]	12	31073860	31104799	p11.21	1
ENSG00000135047	15296.1	0.179249	0.0535597	3.34672	0.000817735	0.02437	up	CTSL	cathepsin L [Source:HGNC Symbol;Acc:HGNC:2537]	9	87726109	87731469	q21.33	1
ENSG00000038945	11418.2	0.165278	0.0493978	3.34586	0.00082028	0.02439	up	MSR1	macrophage scavenger receptor 1 [Source:HGNC Symbol;Acc:HGNC:7376]	8	16107878	16567490	p22	-1
ENSG00000148356	555.69	0.193317	0.0578519	3.34159	0.000832999	0.0247	up	LRSAM1	leucine rich repeat and sterile alpha motif containing 1 [Source:HGNC Symbol;Acc:HGNC:25135]	9	127451486	127503501	q33.3	1
ENSG00000129219	548.818	-0.19426	0.0581987	-3.33788	0.000844216	0.02478	down	PLD2	phospholipase D2 [Source:HGNC Symbol;Acc:HGNC:9068]	17	4807152	4823434	p13.2	1
ENSG00000172197	1678	-0.226585	0.0678695	-3.33854	0.000842187	0.02478	down	MBOAT1	membrane bound O-acyltransferase domain containing 1 [Source:HGNC Symbol;Acc:HGNC:21579]	6	20099684	20212469	p22.3	-1
ENSG00000188613	671.315	-0.333856	0.0999803	-3.33921	0.000840159	0.02478	down	NANOS1	nanos C2HC-type zinc finger 1 [Source:HGNC Symbol;Acc:HGNC:23044]	10	119029714	119033730	q26.11	1
ENSG00000198586	1459.46	0.197837	0.0592508	3.33898	0.000840869	0.02478	up	TLK1	tousled like kinase 1 [Source:HGNC Symbol;Acc:HGNC:11841]	2	170990823	171231314	q31.1	-1
ENSG00000175595	431.021	0.21393	0.0641062	3.33712	0.00084651	0.02478	up	ERCC4	ERCC excision repair 4, endonuclease catalytic subunit [Source:HGNC Symbol;Acc:HGNC:3436]	16	13920157	13952345	p13.12	1
ENSG00000162490	496.01	0.255423	0.0765971	3.33462	0.000854146	0.02494	up	DRAXIN	dorsal inhibitory axon guidance protein [Source:HGNC Symbol;Acc:HGNC:25054]	1	11691710	11725857	p36.22	1
ENSG00000152684	512.999	0.205455	0.0616708	3.33148	0.00086386	0.02516	up	PELO	pelota mRNA surveillance and ribosome rescue factor [Source:HGNC Symbol;Acc:HGNC:8829]	5	52787916	52804044	q11.2	1
ENSG00000057252	14061.5	0.133171	0.0399893	3.33016	0.000867954	0.02522	up	SOAT1	sterol O-acyltransferase 1 [Source:HGNC Symbol;Acc:HGNC:11177]	1	179293714	179358680	q25.2	1
ENSG00000122729	13592.7	-0.158496	0.0476719	-3.32473	0.000885038	0.02565	down	ACO1	aconitase 1 [Source:HGNC Symbol;Acc:HGNC:117]	9	32384603	32454769	p21.1	1
ENSG00000065328	151.287	-0.555245	0.167118	-3.32247	0.000892241	0.02574	down	MCM10	minichromosome maintenance 10 replication initiation factor [Source:HGNC Symbol;Acc:HGNC:18043]	10	13161554	13211104	p13	1
ENSG00000124588	1198.06	0.128739	0.0387494	3.32236	0.000892609	0.02574	up	NQO2	N-ribosyldihydronicotinamide:quinone reductase 2 [Source:HGNC Symbol;Acc:HGNC:7856]	6	2987987	3028869	p25.2	1
ENSG00000137880	155.298	-0.577052	0.173785	-3.32049	0.000898598	0.02585	down	GCHFR	GTP cyclohydrolase I feedback regulator [Source:HGNC Symbol;Acc:HGNC:4194]	15	40764068	40767708	q15.1	1
ENSG00000168439	11662.8	0.091865	0.0276943	3.3171	0.000909563	0.0261	up	STIP1	stress induced phosphoprotein 1 [Source:HGNC Symbol;Acc:HGNC:11387]	11	64185272	64204543	q13.1	1
ENSG00000160991	428.266	0.216982	0.0654462	3.31543	0.000915029	0.02619	up	ORAI2	ORAI calcium release-activated calcium modulator 2 [Source:HGNC Symbol;Acc:HGNC:21667]	7	102433106	102456825	q22.1	1
ENSG00000118515	15793.9	-0.107143	0.032328	-3.31424	0.000918919	0.02624	down	SGK1	serum/glucocorticoid regulated kinase 1 [Source:HGNC Symbol;Acc:HGNC:10810]	6	134169246	134318112	q23.2	-1
ENSG00000186198	52.552	-0.59947	0.18096	-3.31272	0.000923945	0.02632	down	SLC51B	solute carrier family 51 beta subunit [Source:HGNC Symbol;Acc:HGNC:29956]	15	65045387	65053397	q22.31	1
ENSG00000163565	2392.75	-0.172654	0.052185	-3.30851	0.000937948	0.02665	down	IFI16	interferon gamma inducible protein 16 [Source:HGNC Symbol;Acc:HGNC:5395]	1	158999968	159055155	q23.1	1
ENSG00000100296	1146.81	-0.141114	0.0426738	-3.3068	0.000943683	0.02675	down	THOC5	THO complex 5 [Source:HGNC Symbol;Acc:HGNC:19074]	22	29505879	29555216	q12.2	-1
ENSG00000151948	58.6015	-0.589636	0.178456	-3.30409	0.000952846	0.02694	down	GLT1D1	glycosyltransferase 1 domain containing 1 [Source:HGNC Symbol;Acc:HGNC:26483]	12	128853427	128984968	q24.33	1
ENSG00000185420	111.868	-0.412393	0.124935	-3.30085	0.000963916	0.02719	down	SMYD3	SET and MYND domain containing 3 [Source:HGNC Symbol;Acc:HGNC:15513]	1	245749342	246507312	q44	-1
ENSG00000169495	2781.11	-0.21022	0.063703	-3.3	0.000966865	0.0272	down	HTRA4	HtrA serine peptidase 4 [Source:HGNC Symbol;Acc:HGNC:26909]	8	38974228	38988663	p11.22	1
ENSG00000090615	2636.44	0.159417	0.04833	3.29852	0.000971968	0.02728	up	GOLGA3	golgin A3 [Source:HGNC Symbol;Acc:HGNC:4426]	12	132768914	132829078	q24.33	-1
ENSG00000012061	1338.13	-0.176113	0.0534673	-3.29385	0.000988255	0.02746	down	ERCC1	ERCC excision repair 1, endonuclease non-catalytic subunit [Source:HGNC Symbol;Acc:HGNC:3433]	19	45407333	45478828	q13.32	-1
ENSG00000049239	8446.52	-0.188982	0.0573647	-3.29439	0.000986342	0.02746	down	H6PD	hexose-6-phosphate dehydrogenase/glucose 1-dehydrogenase [Source:HGNC Symbol;Acc:HGNC:4795]	1	9234775	9271337	p36.22	1
ENSG00000113552	2445.31	-0.139684	0.0424134	-3.29339	0.000989888	0.02746	down	GNPDA1	glucosamine-6-phosphate deaminase 1 [Source:HGNC Symbol;Acc:HGNC:4417]	5	141991749	142013041	q31.3	-1
ENSG00000115884	633.028	-0.250965	0.076206	-3.29324	0.000990387	0.02746	down	SDC1	syndecan 1 [Source:HGNC Symbol;Acc:HGNC:10658]	2	20200797	20225433	p24.1	-1
ENSG00000184060	1187.77	0.137846	0.041823	3.29593	0.000980962	0.02746	up	ADAP2	ArfGAP with dual PH domains 2 [Source:HGNC Symbol;Acc:HGNC:16487]	17	30906344	30959322	q11.2	1
ENSG00000182957	2464.37	-0.127511	0.0387348	-3.2919	0.000995137	0.02753	down	SPATA13	spermatogenesis associated 13 [Source:HGNC Symbol;Acc:HGNC:23222]	13	23979805	24307074	q12.12	1
ENSG00000134575	6454.74	0.159046	0.0483293	3.29088	0.000998748	0.02756	up	ACP2	acid phosphatase 2, lysosomal [Source:HGNC Symbol;Acc:HGNC:123]	11	47239302	47248906	p11.2	-1
ENSG00000147180	73.837	-0.590578	0.179553	-3.28915	0.0010049	0.02766	down	ZNF711	zinc finger protein 711 [Source:HGNC Symbol;Acc:HGNC:13128]	X	85244032	85273362	q21.1	1
ENSG00000031698	2231.34	0.118646	0.0360801	3.28841	0.00100756	0.02767	up	SARS	seryl-tRNA synthetase [Source:HGNC Symbol;Acc:HGNC:10537]	1	109213918	109238182	p13.3	1
ENSG00000085999	61.5778	-0.684209	0.208123	-3.28752	0.00101074	0.02769	down	RAD54L	RAD54 like [Source:HGNC Symbol;Acc:HGNC:9826]	1	46246461	46278480	p34.1	1
ENSG00000103222	5333.12	0.158385	0.0482494	3.28264	0.00102841	0.02788	up	ABCC1	ATP binding cassette subfamily C member 1 [Source:HGNC Symbol;Acc:HGNC:51]	16	15949577	16143074	p13.11	1
ENSG00000128045	248.995	-0.376857	0.114795	-3.28287	0.00102755	0.02788	down	RASL11B	RAS like family 11 member B [Source:HGNC Symbol;Acc:HGNC:23804]	4	52862317	52866835	q12	1
ENSG00000139318	595.619	0.215347	0.0655895	3.28325	0.00102617	0.02788	up	DUSP6	dual specificity phosphatase 6 [Source:HGNC Symbol;Acc:HGNC:3072]	12	89347235	89352501	q21.33	-1
ENSG00000151012	5152.54	0.258605	0.0787887	3.28226	0.0010298	0.02788	up	SLC7A11	solute carrier family 7 member 11 [Source:HGNC Symbol;Acc:HGNC:11059]	4	138164097	138242349	q28.3	-1
ENSG00000159374	265.218	-0.302144	0.0920341	-3.28295	0.00102725	0.02788	down	M1AP	meiosis 1 associated protein [Source:HGNC Symbol;Acc:HGNC:25183]	2	74557883	74648338	p13.1	-1
ENSG00000155463	4366.66	-0.123238	0.037558	-3.28126	0.00103345	0.02792	down	OXA1L	OXA1L mitochondrial inner membrane protein [Source:HGNC Symbol;Acc:HGNC:8526]	14	22766522	22773042	q11.2	1
ENSG00000111674	1303.28	0.151176	0.046181	3.27355	0.00106207	0.02862	up	ENO2	enolase 2 [Source:HGNC Symbol;Acc:HGNC:3353]	12	6913745	6923698	p13.31	1
ENSG00000011198	968.047	-0.17143	0.0525121	-3.26458	0.00109626	0.02934	down	ABHD5	abhydrolase domain containing 5 [Source:HGNC Symbol;Acc:HGNC:21396]	3	43690108	43734371	p21.33	1
ENSG00000111640	25087.3	0.122234	0.03745	3.26392	0.00109884	0.02934	up	GAPDH	glyceraldehyde-3-phosphate dehydrogenase [Source:HGNC Symbol;Acc:HGNC:4141]	12	6534512	6538374	p13.31	1
ENSG00000115648	294.084	0.333965	0.102301	3.26452	0.0010965	0.02934	up	MLPH	melanophilin [Source:HGNC Symbol;Acc:HGNC:29643]	2	237485428	237555322	q37.3	1
ENSG00000119684	492.848	0.178309	0.0546189	3.2646	0.00109618	0.02934	up	MLH3	mutL homolog 3 [Source:HGNC Symbol;Acc:HGNC:7128]	14	75013764	75051532	q24.3	-1
ENSG00000171960	292.913	-0.276882	0.0848888	-3.26171	0.00110744	0.0295	down	PPIH	peptidylprolyl isomerase H [Source:HGNC Symbol;Acc:HGNC:14651]	1	42658423	42676758	p34.2	1
ENSG00000137055	1028.59	0.161962	0.0496691	3.26083	0.00111087	0.02953	up	PLAA	phospholipase A2 activating protein [Source:HGNC Symbol;Acc:HGNC:9043]	9	26903372	26947242	p21.2	-1
ENSG00000137393	1609.78	-0.252215	0.0774363	-3.25706	0.00112574	0.02985	down	RNF144B	ring finger protein 144B [Source:HGNC Symbol;Acc:HGNC:21578]	6	18387350	18468874	p22.3	1
ENSG00000058262	9509.16	0.135363	0.0416214	3.25225	0.00114496	0.03029	up	SEC61A1	SEC61 translocon alpha 1 subunit [Source:HGNC Symbol;Acc:HGNC:18276]	3	128051641	128071683	q21.3	1
ENSG00000163563	4502.91	-0.181902	0.0559722	-3.24985	0.00115465	0.03048	down	MNDA	myeloid cell nuclear differentiation antigen [Source:HGNC Symbol;Acc:HGNC:7183]	1	158831351	158849506	q23.1	1
ENSG00000184216	3823.85	-0.140032	0.0431036	-3.24873	0.0011592	0.03053	down	IRAK1	interleukin 1 receptor associated kinase 1 [Source:HGNC Symbol;Acc:HGNC:6112]	X	154010506	154019902	q28	-1
ENSG00000170027	9075.96	0.123507	0.0380874	3.24272	0.00118396	0.03111	up	YWHAG	tyrosine 3-monooxygenase/tryptophan 5-monooxygenase activation protein gamma [Source:HGNC Symbol;Acc:HGNC:12852]	7	76326799	76358991	q11.23	-1
ENSG00000143374	928.64	-0.151926	0.0468735	-3.2412	0.00119029	0.03119	down	TARS2	threonyl-tRNA synthetase 2, mitochondrial [Source:HGNC Symbol;Acc:HGNC:30740]	1	150487364	150507609	q21.2	1
ENSG00000167315	4017.38	-0.100365	0.03097	-3.24072	0.00119229	0.03119	down	ACAA2	acetyl-CoA acyltransferase 2 [Source:HGNC Symbol;Acc:HGNC:83]	18	49782164	49813953	q21.1	-1
ENSG00000165280	11857.8	0.107771	0.0332747	3.23884	0.00120018	0.03132	up	VCP	valosin containing protein [Source:HGNC Symbol;Acc:HGNC:12666]	9	35056064	35072627	p13.3	-1
ENSG00000143476	187.01	-0.459409	0.141911	-3.23731	0.00120664	0.03142	down	DTL	denticleless E3 ubiquitin protein ligase homolog [Source:HGNC Symbol;Acc:HGNC:30288]	1	212035553	212107400	q32.3	1
ENSG00000130755	2292.63	-0.19836	0.0612945	-3.23619	0.00121138	0.03147	down	GMFG	glia maturation factor gamma [Source:HGNC Symbol;Acc:HGNC:4374]	19	39328353	39342372	q13.2	-1
ENSG00000134769	249.574	0.276044	0.0854741	3.22957	0.00123979	0.03214	up	DTNA	dystrobrevin alpha [Source:HGNC Symbol;Acc:HGNC:3057]	18	34493290	34891844	q12.1	1
ENSG00000170802	717.797	0.216224	0.0669658	3.22887	0.00124279	0.03214	up	FOXN2	forkhead box N2 [Source:HGNC Symbol;Acc:HGNC:5281]	2	48314637	48379295	p16.3	1
ENSG00000072042	2083.36	0.142888	0.0442631	3.22815	0.00124596	0.03215	up	RDH11	retinol dehydrogenase 11 [Source:HGNC Symbol;Acc:HGNC:17964]	14	67676800	67695793	q24.1	-1
ENSG00000065057	117.737	-0.418824	0.130114	-3.2189	0.00128682	0.03313	down	NTHL1	nth like DNA glycosylase 1 [Source:HGNC Symbol;Acc:HGNC:8028]	16	2039815	2047866	p13.3	-1
ENSG00000091831	287.055	-0.251936	0.0784139	-3.2129	0.00131402	0.03376	down	ESR1	estrogen receptor 1 [Source:HGNC Symbol;Acc:HGNC:3467]	6	151656691	152129619	q25.1	1
ENSG00000114737	1277.36	0.138782	0.0432241	3.21077	0.00132382	0.03393	up	CISH	cytokine inducible SH2 containing protein [Source:HGNC Symbol;Acc:HGNC:1984]	3	50606490	50611831	p21.2	-1
ENSG00000110079	1685.82	-0.219636	0.0684729	-3.20763	0.00133833	0.03423	down	MS4A4A	membrane spanning 4-domains A4A [Source:HGNC Symbol;Acc:HGNC:13371]	11	60185702	60317944	q12.2	1
ENSG00000121769	5620.27	-0.182027	0.0568078	-3.20425	0.00135413	0.03456	down	FABP3	fatty acid binding protein 3 [Source:HGNC Symbol;Acc:HGNC:3557]	1	31365253	31376850	p35.2	-1
ENSG00000124006	197.046	-0.360979	0.11274	-3.20187	0.00136537	0.03476	down	OBSL1	obscurin like 1 [Source:HGNC Symbol;Acc:HGNC:29092]	2	219550728	219571859	q35	-1
ENSG00000178175	2874.96	-0.165468	0.0516878	-3.2013	0.00136808	0.03476	down	ZNF366	zinc finger protein 366 [Source:HGNC Symbol;Acc:HGNC:18316]	5	72439903	72507410	q13.2	-1
ENSG00000091129	176.772	-0.384265	0.120131	-3.19873	0.00138037	0.03492	down	NRCAM	neuronal cell adhesion molecule [Source:HGNC Symbol;Acc:HGNC:7994]	7	108147623	108456717	q31.1	-1
ENSG00000119705	582.92	-0.268708	0.0839993	-3.19893	0.00137939	0.03492	down	SLIRP	SRA stem-loop interacting RNA binding protein [Source:HGNC Symbol;Acc:HGNC:20495]	14	77708071	77761104	q24.3	1
ENSG00000163958	206.055	0.378823	0.118516	3.19639	0.00139159	0.03505	up	ZDHHC19	zinc finger DHHC-type containing 19 [Source:HGNC Symbol;Acc:HGNC:20713]	3	196197452	196211437	q29	-1
ENSG00000181019	1552.12	0.151849	0.0475071	3.19635	0.00139178	0.03505	up	NQO1	NAD(P)H quinone dehydrogenase 1 [Source:HGNC Symbol;Acc:HGNC:2874]	16	69706996	69726668	q22.1	-1
ENSG00000164244	1752.87	0.149122	0.0466663	3.1955	0.0013959	0.03508	up	PRRC1	proline rich coiled-coil 1 [Source:HGNC Symbol;Acc:HGNC:28164]	5	127517609	127555089	q23.2	1
ENSG00000133985	79.9649	0.445654	0.139577	3.19289	0.00140855	0.03532	up	TTC9	tetratricopeptide repeat domain 9 [Source:HGNC Symbol;Acc:HGNC:20267]	14	70641916	70675366	q24.2	1
ENSG00000173327	7013.41	-0.240962	0.0755619	-3.18893	0.00142798	0.03573	down	MAP3K11	mitogen-activated protein kinase kinase kinase 11 [Source:HGNC Symbol;Acc:HGNC:6850]	11	65597756	65615382	q13.1	-1
ENSG00000079616	259.753	-0.325265	0.102035	-3.18778	0.00143371	0.03574	down	KIF22	kinesin family member 22 [Source:HGNC Symbol;Acc:HGNC:6391]	16	29790719	29805385	p11.2	1
ENSG00000180304	3045.58	-0.171558	0.0538202	-3.18761	0.00143453	0.03574	down	OAZ2	ornithine decarboxylase antizyme 2 [Source:HGNC Symbol;Acc:HGNC:8096]	15	64687573	64703281	q22.31	-1
ENSG00000116406	1530.72	0.129935	0.0408268	3.18259	0.00145964	0.03629	up	EDEM3	ER degradation enhancing alpha-mannosidase like protein 3 [Source:HGNC Symbol;Acc:HGNC:16787]	1	184690237	184754907	q25.3	-1
ENSG00000076555	526.763	-0.238337	0.0749625	-3.17941	0.00147575	0.03653	down	ACACB	acetyl-CoA carboxylase beta [Source:HGNC Symbol;Acc:HGNC:85]	12	109116595	109268226	q24.11	1
ENSG00000135404	51433.2	-0.123658	0.0388863	-3.18	0.00147276	0.03653	down	CD63	CD63 molecule [Source:HGNC Symbol;Acc:HGNC:1692]	12	55725323	55729707	q13.2	-1
ENSG00000136933	719.261	-0.15951	0.0501867	-3.17833	0.00148125	0.03659	down	RABEPK	Rab9 effector protein with kelch motifs [Source:HGNC Symbol;Acc:HGNC:16896]	9	125200542	125234161	q33.3	1
ENSG00000114316	2249.76	-0.115121	0.0362587	-3.175	0.00149837	0.03691	down	USP4	ubiquitin specific peptidase 4 [Source:HGNC Symbol;Acc:HGNC:12627]	3	49277144	49340712	p21.31	-1
ENSG00000149639	3048.24	0.222788	0.0701797	3.17454	0.00150076	0.03691	up	SOGA1	suppressor of glucose, autophagy associated 1 [Source:HGNC Symbol;Acc:HGNC:16111]	20	36777447	36863538	q11.23	-1
ENSG00000128590	899.744	0.336083	0.105898	3.17364	0.0015054	0.03695	up	DNAJB9	DnaJ heat shock protein family (Hsp40) member B9 [Source:HGNC Symbol;Acc:HGNC:6968]	7	108569867	108574850	q31.1	1
ENSG00000168159	2404.77	0.130104	0.0410289	3.17104	0.00151893	0.03712	up	RNF187	ring finger protein 187 [Source:HGNC Symbol;Acc:HGNC:27146]	1	228487382	228496188	q42.13	1
ENSG00000168350	58.0674	0.577024	0.181939	3.17152	0.00151645	0.03712	up	DEGS2	delta 4-desaturase, sphingolipid 2 [Source:HGNC Symbol;Acc:HGNC:20113]	14	100143957	100159645	q32.2	-1
ENSG00000142765	539.786	-0.403045	0.127184	-3.16899	0.00152968	0.03723	down	SYTL1	synaptotagmin like 1 [Source:HGNC Symbol;Acc:HGNC:15584]	1	27342020	27353937	p36.11	1
ENSG00000187630	751.318	-0.214475	0.0676695	-3.16945	0.00152727	0.03723	down	DHRS4L2	dehydrogenase/reductase 4 like 2 [Source:HGNC Symbol;Acc:HGNC:19731]	14	23969874	24006408	q11.2	1
ENSG00000059804	957.768	0.254186	0.0803388	3.16393	0.00155655	0.0378	up	SLC2A3	solute carrier family 2 member 3 [Source:HGNC Symbol;Acc:HGNC:11007]	12	7919230	7936187	p13.31	-1
ENSG00000159216	1250.05	0.213704	0.0675938	3.16159	0.00155655	0.03802	up	RUNX1	RUNX family transcription factor 1 [Source:HGNC Symbol;Acc:HGNC:10471]	21	34787801	36004667	q22.12	-1
ENSG00000186185	69.5055	-0.797223	0.252243	-3.16054	0.00157478	0.03808	down	KIF18B	kinesin family member 18B [Source:HGNC Symbol;Acc:HGNC:27102]	17	44924709	44947773	q21.31	-1
ENSG00000140368	2910.59	-0.137742	0.0435972	-3.15942	0.00158085	0.03815	down	PSTPIP1	proline-serine-threonine phosphatase interacting protein 1 [Source:HGNC Symbol;Acc:HGNC:9580]	15	76993359	77037475	q24.3	1
ENSG00000091106	786.005	-0.216716	0.0686259	-3.15793	0.00158894	0.03817	down	NLRC4	NLR family CARD domain containing 4 [Source:HGNC Symbol;Acc:HGNC:16412]	2	32224453	32265732	p22.3	-1
ENSG00000129484	317.019	-0.256286	0.0811421	-3.15849	0.0015859	0.03817	down	PARP2	poly(ADP-ribose) polymerase 2 [Source:HGNC Symbol;Acc:HGNC:272]	14	20343582	20357905	q11.2	1
ENSG00000141503	4379.97	-0.141173	0.0447288	-3.1562	0.00159841	0.03817	down	MINK1	misshapen like kinase 1 [Source:HGNC Symbol;Acc:HGNC:17565]	17	4833340	4898061	p13.2	1
ENSG00000146072	3933.12	0.170219	0.0539318	3.15619	0.00159846	0.03817	up	TNFRSF21	TNF receptor superfamily member 21 [Source:HGNC Symbol;Acc:HGNC:13469]	6	47231532	47309905	p12.3	-1
ENSG00000161010	399.87	0.30609	0.0969639	3.15674	0.00159544	0.03817	up	MRNIP	MRN complex interacting protein [Source:HGNC Symbol;Acc:HGNC:30817]	5	179835133	179862173	q35.3	-1
ENSG00000151729	144.566	-0.351042	0.111316	-3.15358	0.00161283	0.03839	down	SLC25A4	solute carrier family 25 member 4 [Source:HGNC Symbol;Acc:HGNC:10990]	4	185143266	185150382	q35.1	1
ENSG00000186648	205.602	-0.275078	0.0872332	-3.15336	0.00161401	0.03839	down	CARMIL3	capping protein regulator and myosin 1 linker 3 [Source:HGNC Symbol;Acc:HGNC:20272]	14	24052009	24069729	q11.2	1
ENSG00000068489	330.691	-0.269266	0.085455	-3.15097	0.00162728	0.03862	down	PRR11	proline rich 11 [Source:HGNC Symbol;Acc:HGNC:25619]	17	59155499	59204705	q22	1
ENSG00000265972	4517.35	-0.168118	0.0534105	-3.14766	0.00164583	0.03898	down	TXNIP	thioredoxin interacting protein [Source:HGNC Symbol;Acc:HGNC:16952]	1	145992435	145996579	q21.1	-1
ENSG00000012817	1106.62	-3.61655	1.14991	-3.14506	0.00166055	0.03925	down	KDM5D	lysine demethylase 5D [Source:HGNC Symbol;Acc:HGNC:11115]	Y	19703865	19744939	q11.223	-1
ENSG00000188522	415.543	0.207354	0.0659453	3.14433	0.00166469	0.03927	up	FAM83G	family with sequence similarity 83 member G [Source:HGNC Symbol;Acc:HGNC:32554]	17	18968789	19004764	p11.2	-1
ENSG00000042493	47492.4	-0.1698	0.054033	-3.14253	0.00167495	0.03927	down	CAPG	capping actin protein, gelsolin like [Source:HGNC Symbol;Acc:HGNC:1474]	2	85394753	85418432	p11.2	-1
ENSG00000124783	3425.13	0.192967	0.0614	3.14279	0.00167344	0.03927	up	SSR1	signal sequence receptor subunit 1 [Source:HGNC Symbol;Acc:HGNC:11323]	6	7268306	7347446	p24.3	-1
ENSG00000146729	1926.31	-0.144626	0.0460164	-3.14292	0.00167273	0.03927	down	NIPSNAP2	nipsnap homolog 2 [Source:HGNC Symbol;Acc:HGNC:4179]	7	55951793	56000181	p11.2	1
ENSG00000196839	231.368	0.335999	0.106971	3.14104	0.00168352	0.03939	up	ADA	adenosine deaminase [Source:HGNC Symbol;Acc:HGNC:186]	20	44619522	44652233	q13.12	-1
ENSG00000147872	6509.6	-0.0999745	0.0318497	-3.13895	0.00169555	0.03945	down	PLIN2	perilipin 2 [Source:HGNC Symbol;Acc:HGNC:248]	9	19108375	19149290	p22.1	-1
ENSG00000152229	1318.04	-0.204385	0.0650932	-3.13987	0.00169021	0.03945	down	PSTPIP2	proline-serine-threonine phosphatase interacting protein 2 [Source:HGNC Symbol;Acc:HGNC:9581]	18	45983536	46072272	q21.1	-1
ENSG00000275023	1855.51	0.170375	0.0542803	3.1388	0.00169642	0.03945	up	MLLT6	MLLT6, PHD finger containing [Source:HGNC Symbol;Acc:HGNC:7138]	17	38705273	38729795	q12	1
ENSG00000023734	2348.36	0.135277	0.0431533	3.1348	0.0017197	0.03991	up	STRAP	serine/threonine kinase receptor associated protein [Source:HGNC Symbol;Acc:HGNC:30796]	12	15882387	15903478	p12.3	1
ENSG00000100297	2141.39	-0.122192	0.0390387	-3.13003	0.00174789	0.04037	down	MCM5	minichromosome maintenance complex component 5 [Source:HGNC Symbol;Acc:HGNC:6948]	22	35400134	35425431	q12.3	1
ENSG00000130560	1453.53	-0.118469	0.0378603	-3.12911	0.00175338	0.04037	down	UBAC1	UBA domain containing 1 [Source:HGNC Symbol;Acc:HGNC:30221]	9	135932969	135961373	q34.3	-1
ENSG00000136710	1950.55	-0.152918	0.0488641	-3.12944	0.00175137	0.04037	down	CCDC115	coiled-coil domain containing 115 [Source:HGNC Symbol;Acc:HGNC:28178]	2	130337933	130342699	q21.1	-1
ENSG00000155660	4588.34	0.177709	0.0567619	3.13078	0.00174346	0.04037	up	PDIA4	protein disulfide isomerase family A member 4 [Source:HGNC Symbol;Acc:HGNC:30167]	7	149003062	149028662	q36.1	-1
ENSG00000173163	532.022	-0.209053	0.0668321	-3.12803	0.00175979	0.04044	down	COMMD1	copper metabolism domain containing 1 [Source:HGNC Symbol;Acc:HGNC:23024]	2	61888724	62147247	p15	1
ENSG00000179941	478.937	-0.200939	0.0642938	-3.12533	0.00177606	0.04073	down	BBS10	Bardet-Biedl syndrome 10 [Source:HGNC Symbol;Acc:HGNC:26291]	12	76344474	76348415	q21.2	-1
ENSG00000115129	688.05	-0.172117	0.0551115	-3.12308	0.00178972	0.0408	down	TP53I3	tumor protein p53 inducible protein 3 [Source:HGNC Symbol;Acc:HGNC:19373]	2	24077433	24085861	p23.3	-1
ENSG00000121152	15628.7	-0.137145	0.0439072	-3.12353	0.00178698	0.0408	down	NCAPH	non-SMC condensin I complex subunit H [Source:HGNC Symbol;Acc:HGNC:1112]	2	96335766	96377091	q11.2	1
ENSG00000124496	1295.56	0.160656	0.0514338	3.12355	0.00178685	0.0408	up	TRERF1	transcriptional regulating factor 1 [Source:HGNC Symbol;Acc:HGNC:18273]	6	42224931	42452051	p21.1	-1
ENSG00000172869	4905.39	0.18099	0.0581182	3.11417	0.00184464	0.04197	up	DMXL1	Dmx like 1 [Source:HGNC Symbol;Acc:HGNC:2937]	5	119037772	119249138	q23.1	1
ENSG00000179630	538.58	0.229584	0.0738443	3.10903	0.001877	0.04262	up	LACC1	laccase domain containing 1 [Source:HGNC Symbol;Acc:HGNC:26789]	13	43879284	43893932	q14.11	1
ENSG00000159023	1760.87	0.110925	0.0356965	3.10745	0.00188708	0.04277	up	EPB41	erythrocyte membrane protein band 4.1 [Source:HGNC Symbol;Acc:HGNC:3377]	1	28887091	29120046	p35.3	1
ENSG00000100347	1418.69	-0.159093	0.0512298	-3.10547	0.00189977	0.04297	down	SAMM50	SAMM50 sorting and assembly machinery component [Source:HGNC Symbol;Acc:HGNC:24276]	22	43955442	44010531	q13.31	1
ENSG00000143198	2470.58	-0.179871	0.0579326	-3.10483	0.0019039	0.04298	down	MGST3	microsomal glutathione S-transferase 3 [Source:HGNC Symbol;Acc:HGNC:7064]	1	165631213	165661796	q24.1	1
ENSG00000236700	7837.76	-0.131881	0.0425014	-3.10297	0.00191586	0.04316	down	LINC01010	long intergenic non-protein coding RNA 1010 [Source:HGNC Symbol;Acc:HGNC:48978]	6	134343307	134504581	q23.2	1
ENSG00000237510	60.3986	-0.659248	0.212545	-3.10169	0.00192422	0.04327	down	GPAT2P1	glycerol-3-phosphate acyltransferase 2 pseudogene 1 [Source:HGNC Symbol;Acc:HGNC:52330]	2	95789654	95800166	q11.1	1
ENSG00000011083	241.529	-0.353983	0.114239	-3.09863	0.00194416	0.04363	down	SLC6A7	solute carrier family 6 member 7 [Source:HGNC Symbol;Acc:HGNC:11054]	5	150190062	150222788	q32	1
ENSG00000114982	1642.1	0.11369	0.0367392	3.0945	0.00197143	0.04413	up	KANSL3	KAT8 regulatory NSL complex subunit 3 [Source:HGNC Symbol;Acc:HGNC:25473]	2	96593170	96642787	q11.2	-1
ENSG00000115325	1653.8	-0.145704	0.0471039	-3.09324	0.00197985	0.04413	down	DOK1	docking protein 1 [Source:HGNC Symbol;Acc:HGNC:2990]	2	74549026	74557554	p13.1	1
ENSG00000155229	2369.86	-0.104192	0.0336911	-3.09256	0.00198436	0.04413	down	MMS19	MMS19 homolog, cytosolic iron-sulfur assembly component [Source:HGNC Symbol;Acc:HGNC:13824]	10	97458324	97498794	q24.1	-1
ENSG00000173198	168.919	-0.465949	0.150671	-3.0925	0.00198479	0.04413	down	CYSLTR1	cysteinyl leukotriene receptor 1 [Source:HGNC Symbol;Acc:HGNC:17451]	X	78271468	78327691	q21.1	-1
ENSG00000184445	623.09	-0.195766	0.0633062	-3.09236	0.00198572	0.04413	down	KNTC1	kinetochore associated 1 [Source:HGNC Symbol;Acc:HGNC:17255]	12	122527246	122626396	q24.31	1
ENSG00000149187	6878.28	-0.12685	0.0410382	-3.09102	0.0019947	0.04421	down	CELF1	CUGBP Elav-like family member 1 [Source:HGNC Symbol;Acc:HGNC:2549]	11	47465933	47565569	p11.2	-1
ENSG00000158470	2865.22	0.109692	0.0354913	3.09068	0.00199696	0.04421	up	B4GALT5	beta-1,4-galactosyltransferase 5 [Source:HGNC Symbol;Acc:HGNC:928]	20	49632945	49713878	q13.13	-1
ENSG00000172732	628.667	-0.196831	0.0637702	-3.08657	0.00202477	0.04474	down	MUS81	MUS81 structure-specific endonuclease subunit [Source:HGNC Symbol;Acc:HGNC:29814]	11	65857126	65867653	q13.1	1
ENSG00000105639	291.508	-0.244476	0.0792258	-3.08581	0.00202999	0.04477	down	JAK3	Janus kinase 3 [Source:HGNC Symbol;Acc:HGNC:6193]	19	17824780	17848071	p13.11	-1
ENSG00000129534	893.731	-0.176743	0.0573599	-3.0813	0.00206102	0.04537	down	MIS18BP1	MIS18 binding protein 1 [Source:HGNC Symbol;Acc:HGNC:20190]	14	45203190	45253540	q21.2	-1
ENSG00000163154	962.288	-0.193773	0.062927	-3.07934	0.00207463	0.04555	down	TNFAIP8L2	TNF alpha induced protein 8 like 2 [Source:HGNC Symbol;Acc:HGNC:26277]	1	151156649	151159749	q21.3	1
ENSG00000163468	4132.67	0.103784	0.0337096	3.07877	0.00207856	0.04555	up	CCT3	chaperonin containing TCP1 subunit 3 [Source:HGNC Symbol;Acc:HGNC:1616]	1	156308968	156367873	q22	-1
ENSG00000213341	1425.59	0.128599	0.0417745	3.07841	0.00208107	0.04555	up	CHUK	component of inhibitor of nuclear factor kappa B kinase complex [Source:HGNC Symbol;Acc:HGNC:1974]	10	100188300	100229596	q24.31	-1
ENSG00000072778	6628.9	-0.127664	0.0415041	-3.07593	0.00209844	0.04561	down	ACADVL	acyl-CoA dehydrogenase very long chain [Source:HGNC Symbol;Acc:HGNC:92]	17	7217125	7225266	p13.1	1
ENSG00000134308	5991.14	0.118629	0.0385639	3.07616	0.00209687	0.04561	up	YWHAQ	tyrosine 3-monooxygenase/tryptophan 5-monooxygenase activation protein theta [Source:HGNC Symbol;Acc:HGNC:12854]	2	9583967	9630997	p25.1	-1
ENSG00000158615	2831.82	0.133136	0.0432641	3.07729	0.0020889	0.04561	up	PPP1R15B	protein phosphatase 1 regulatory subunit 15B [Source:HGNC Symbol;Acc:HGNC:14951]	1	204403381	204411817	q32.1	-1
ENSG00000170919	113.075	0.376882	0.122532	3.07579	0.00209944	0.04561	up	TPT1-AS1	TPT1 antisense RNA 1 [Source:HGNC Symbol;Acc:HGNC:43686]	13	45341345	45417975	q14.13	1
ENSG00000182628	131.213	-0.377481	0.122762	-3.07491	0.00210567	0.04566	down	SKA2	spindle and kinetochore associated complex subunit 2 [Source:HGNC Symbol;Acc:HGNC:28006]	17	59109857	59155260	q22	-1
ENSG00000112773	1207.37	-0.175547	0.0571016	-3.07429	0.00211002	0.04566	down	TENT5A	terminal nucleotidyltransferase 5A [Source:HGNC Symbol;Acc:HGNC:18345]	6	81491439	81752774	q14.1	-1
ENSG00000139832	3224.69	-0.17821	0.0580095	-3.07208	0.00212572	0.04585	down	RAB20	RAB20, member RAS oncogene family [Source:HGNC Symbol;Acc:HGNC:18260]	13	110523066	110561722	q34	-1
ENSG00000204389	1361.22	0.145072	0.0472242	3.07199	0.00212639	0.04585	up	HSPA1A	heat shock protein family A (Hsp70) member 1A [Source:HGNC Symbol;Acc:HGNC:5232]	6	31815543	31817946	p21.33	1
ENSG00000135678	19217.4	-0.146667	0.0477841	-3.06937	0.00214512	0.04616	down	CPM	carboxypeptidase M [Source:HGNC Symbol;Acc:HGNC:2311]	12	68842197	68971570	q15	-1
ENSG00000110536	515.312	-0.183832	0.0599361	-3.06714	0.00216116	0.04642	down	PTPMT1	protein tyrosine phosphatase mitochondrial 1 [Source:HGNC Symbol;Acc:HGNC:26965]	11	47565430	47573461	p11.2	1
ENSG00000182827	1641.01	0.117799	0.0384165	3.06636	0.00216679	0.04646	up	ACBD3	acyl-CoA binding domain containing 3 [Source:HGNC Symbol;Acc:HGNC:15453]	1	226144679	226186741	q42.12	-1
ENSG00000100439	2709.06	0.138368	0.0451451	3.06497	0.00217695	0.04659	up	ABHD4	abhydrolase domain containing 4 [Source:HGNC Symbol;Acc:HGNC:20154]	14	22598237	22613215	q11.2	1
ENSG00000137976	1007.06	-0.207385	0.0676985	-3.06337	0.00218863	0.04675	down	DNASE2B	deoxyribonuclease 2 beta [Source:HGNC Symbol;Acc:HGNC:28875]	1	84398532	84415018	p31.1	1
ENSG00000163131	83263.9	-0.113627	0.037104	-3.0624	0.00219572	0.0468	down	CTSS	cathepsin S [Source:HGNC Symbol;Acc:HGNC:2545]	1	150730188	150765792	q21.3	-1
ENSG00000197102	10799.3	0.172209	0.0562418	3.06194	0.00219904	0.0468	up	DYNC1H1	dynein cytoplasmic 1 heavy chain 1 [Source:HGNC Symbol;Acc:HGNC:2961]	14	101964573	102056443	q32.31	1
ENSG00000189057	247.221	-0.450648	0.147276	-3.05989	0.00221416	0.04704	down	FAM111B	family with sequence similarity 111 member B [Source:HGNC Symbol;Acc:HGNC:24200]	11	59107185	59127412	q12.1	1
ENSG00000085449	3885.25	-0.100918	0.0329943	-3.05866	0.00222326	0.04714	down	WDFY1	WD repeat and FYVE domain containing 1 [Source:HGNC Symbol;Acc:HGNC:20451]	2	223855716	223945357	q36.1	-1
ENSG00000079819	2061.59	-0.163573	0.0535037	-3.05723	0.00223392	0.04719	down	EPB41L2	erythrocyte membrane protein band 4.1 like 2 [Source:HGNC Symbol;Acc:HGNC:3379]	6	130839347	131063322	q23.2	-1
ENSG00000169359	1124.54	0.208418	0.0681688	3.05738	0.00223281	0.04719	up	SLC33A1	solute carrier family 33 member 1 [Source:HGNC Symbol;Acc:HGNC:95]	3	155821024	155854456	q25.31	-1
ENSG00000141401	219.003	-0.310212	0.101493	-3.05648	0.00223955	0.04723	down	IMPA2	inositol monophosphatase 2 [Source:HGNC Symbol;Acc:HGNC:6051]	18	11981025	12030877	p11.21	1
ENSG00000117228	1690.85	-0.21493	0.0703458	-3.05534	0.00224807	0.04732	down	GBP1	guanylate binding protein 1 [Source:HGNC Symbol;Acc:HGNC:4182]	1	89052319	89065230	p22.2	-1
ENSG00000136040	12316.3	-0.157767	0.0517231	-3.05023	0.00228669	0.04787	down	PLXNC1	plexin C1 [Source:HGNC Symbol;Acc:HGNC:9106]	12	94148577	94307675	q22	1
ENSG00000167792	3682.55	-0.138551	0.0454198	-3.05045	0.00228501	0.04787	down	NDUFV1	NADH:ubiquinone oxidoreductase core subunit V1 [Source:HGNC Symbol;Acc:HGNC:7716]	11	67605653	67612554	q13.2	1
ENSG00000197442	2639.5	-0.103273	0.0338501	-3.0509	0.00228155	0.04787	down	MAP3K5	mitogen-activated protein kinase kinase kinase 5 [Source:HGNC Symbol;Acc:HGNC:6857]	6	136557046	136792477	q23.3	-1
ENSG00000110799	382.858	0.297816	0.0978283	3.04427	0.00233244	0.04874	up	VWF	von Willebrand factor [Source:HGNC Symbol;Acc:HGNC:12726]	12	5948874	6124770	p13.31	-1
ENSG00000168995	901.375	-0.149984	0.0493443	-3.03954	0.00236943	0.04942	down	SIGLEC7	sialic acid binding Ig like lectin 7 [Source:HGNC Symbol;Acc:HGNC:10876]	19	51142299	51153526	q13.41	1
ENSG00000003436	413.268	0.218959	0.0720597	3.03857	0.00237702	0.04949	up	TFPI	tissue factor pathway inhibitor [Source:HGNC Symbol;Acc:HGNC:11760]	2	187464230	187565760	q32.1	-1
ENSG00000117448	11253.4	-0.161218	0.0530818	-3.03717	0.00238814	0.04963	down	AKR1A1	aldo-keto reductase family 1 member A1 [Source:HGNC Symbol;Acc:HGNC:380]	1	45550543	45570049	p34.1	1
ENSG00000085063	10117.3	-0.109005	0.0359063	-3.0358	0.00239895	0.04977	down	CD59	CD59 molecule (CD59 blood group) [Source:HGNC Symbol;Acc:HGNC:1689]	11	33703010	33736491	p13	-1
