# Supplementary material for: The antibiotic bedaquiline activates host macrophage innate immune resistance to bacterial infection
Source: eLife. 2020 May 4;9:e55692. doi: 10.7554/eLife.55692 (PMC7200153; doi:10.7554/eLife.55692)
Supplement: Figure 5—source data 3. — FDR < 0.05. [file elife-55692-fig5-data3.xlsx]

## Sheet: Feuil1
ensembl_gene_id	baseMean	log2FoldChange	lfcSE	stat	pvalue	padj	direction	hgnc_symbol	description	chromosome_name	start_position	end_position	band	strand
ENSG00000173575	2164.68	-1.18579	0.084749	-13.9918	1.74998e-44	2.204e-40	down	CHD2	chromodomain helicase DNA binding protein 2 [Source:HGNC Symbol;Acc:HGNC:1917]	15	92900189	93027996	q26.1	1
ENSG00000136161	6928.81	-0.470749	0.0465605	-10.1105	4.96421e-24	3.126e-20	down	RCBTB2	RCC1 and BTB domain containing protein 2 [Source:HGNC Symbol;Acc:HGNC:1914]	13	48488959	48533256	q14.2	-1
ENSG00000073111	981.13	-0.509834	0.0536056	-9.51084	1.89126e-21	7.94e-18	down	MCM2	minichromosome maintenance complex component 2 [Source:HGNC Symbol;Acc:HGNC:6944]	3	127598410	127622436	q21.3	1
ENSG00000044574	15697	0.479331	0.051976	9.22217	2.91147e-20	9.167e-17	up	HSPA5	heat shock protein family A (Hsp70) member 5 [Source:HGNC Symbol;Acc:HGNC:5238]	9	125234853	125241343	q33.3	-1
ENSG00000099194	26790.8	0.415357	0.0501658	8.27968	1.23508e-16	3.111e-13	up	SCD	stearoyl-CoA desaturase [Source:HGNC Symbol;Acc:HGNC:10571]	10	100347233	100364826	q24.31	1
ENSG00000196405	15012.5	-0.301844	0.0382117	-7.89927	2.80537e-15	5.888e-12	down	EVL	Enah/Vasp-like [Source:HGNC Symbol;Acc:HGNC:20234]	14	99971449	100144236	q32.2	1
ENSG00000124762	14240.2	0.331967	0.0421797	7.87032	3.5374e-15	6.364e-12	up	CDKN1A	cyclin dependent kinase inhibitor 1A [Source:HGNC Symbol;Acc:HGNC:1784]	6	36676460	36687339	p21.2	1
ENSG00000135094	588.766	0.62873	0.0812919	7.73422	1.04035e-14	1.638e-11	up	SDS	serine dehydratase [Source:HGNC Symbol;Acc:HGNC:10691]	12	113392445	113426301	q24.13	-1
ENSG00000140450	1646.94	0.349089	0.0477557	7.30989	2.67352e-13	3.741e-10	up	ARRDC4	arrestin domain containing 4 [Source:HGNC Symbol;Acc:HGNC:28087]	15	97960703	97973833	q26.2	1
ENSG00000167202	5086.83	-0.284193	0.0397358	-7.15205	8.54887e-13	1.077e-09	down	TBC1D2B	TBC1 domain family member 2B [Source:HGNC Symbol;Acc:HGNC:29183]	15	77984036	78077724	q25.1	-1
ENSG00000104738	1171.04	-0.366479	0.0514233	-7.12671	1.02799e-12	1.177e-09	down	MCM4	minichromosome maintenance complex component 4 [Source:HGNC Symbol;Acc:HGNC:6947]	8	47960185	47978160	q11.21	1
ENSG00000112118	1489.88	-0.336745	0.0491396	-6.85281	7.24113e-12	7.6e-09	down	MCM3	minichromosome maintenance complex component 3 [Source:HGNC Symbol;Acc:HGNC:6945]	6	52264014	52284881	p12.2	-1
ENSG00000106366	1008.5	0.44609	0.0659003	6.76916	1.29536e-11	1.255e-08	up	SERPINE1	serpin family E member 1 [Source:HGNC Symbol;Acc:HGNC:8583]	7	101127089	101139266	q22.1	1
ENSG00000100234	14956	0.339394	0.0505674	6.71172	1.92344e-11	1.695e-08	up	TIMP3	TIMP metallopeptidase inhibitor 3 [Source:HGNC Symbol;Acc:HGNC:11822]	22	32801701	32863043	q12.3	1
ENSG00000111012	7139.5	-0.457644	0.0682575	-6.70467	2.01858e-11	1.695e-08	down	CYP27B1	cytochrome P450 family 27 subfamily B member 1 [Source:HGNC Symbol;Acc:HGNC:2606]	12	57762334	57768986	q14.1	-1
ENSG00000139289	1687.03	0.420939	0.0650054	6.47544	9.45331e-11	7.441e-08	up	PHLDA1	pleckstrin homology like domain family A member 1 [Source:HGNC Symbol;Acc:HGNC:8933]	12	76025447	76033932	q21.2	-1
ENSG00000157193	829.155	0.357943	0.0557088	6.42524	1.31661e-10	9.754e-08	up	LRP8	LDL receptor related protein 8 [Source:HGNC Symbol;Acc:HGNC:6700]	1	53242364	53328469	p32.3	-1
ENSG00000165474	2330.38	-0.370965	0.0585344	-6.33757	2.33423e-10	1.633e-07	down	GJB2	gap junction protein beta 2 [Source:HGNC Symbol;Acc:HGNC:4284]	13	20187463	20192938	q12.11	-1
ENSG00000173210	143.042	0.669335	0.106751	6.27005	3.60928e-10	2.392e-07	up	ABLIM3	actin binding LIM protein family member 3 [Source:HGNC Symbol;Acc:HGNC:29132]	5	149141483	149260542	q32	1
ENSG00000156802	681.483	-0.315098	0.0504718	-6.24304	4.29159e-10	2.702e-07	down	ATAD2	ATPase family AAA domain containing 2 [Source:HGNC Symbol;Acc:HGNC:30123]	8	123319850	123416350	q24.13	-1
ENSG00000149428	3202.24	0.458654	0.0737471	6.21928	4.99453e-10	2.995e-07	up	HYOU1	hypoxia up-regulated 1 [Source:HGNC Symbol;Acc:HGNC:16931]	11	119044188	119057227	q23.3	-1
ENSG00000100418	1602.13	0.262863	0.0426024	6.17013	6.82335e-10	3.782e-07	up	DESI1	desumoylating isopeptidase 1 [Source:HGNC Symbol;Acc:HGNC:24577]	22	41598028	41621043	q13.2	-1
ENSG00000125730	3800.1	0.268129	0.0434694	6.16822	6.9061e-10	3.782e-07	up	C3	complement C3 [Source:HGNC Symbol;Acc:HGNC:1318]	19	6677704	6730562	p13.3	-1
ENSG00000117115	2956.74	-0.416504	0.0677659	-6.14622	7.93503e-10	4.164e-07	down	PADI2	peptidyl arginine deiminase 2 [Source:HGNC Symbol;Acc:HGNC:18341]	1	17066761	17119451	p36.13	-1
ENSG00000166347	1098.82	-0.399147	0.0652177	-6.12022	9.34463e-10	4.707e-07	down	CYB5A	cytochrome b5 type A [Source:HGNC Symbol;Acc:HGNC:2570]	18	74250846	74291973	q22.3	-1
ENSG00000156414	2321.39	-0.237373	0.0388699	-6.10685	1.01614e-09	4.922e-07	down	TDRD9	tudor domain containing 9 [Source:HGNC Symbol;Acc:HGNC:20122]	14	103928456	104052667	q32.33	1
ENSG00000169136	1223.6	0.318994	0.052376	6.09046	1.12589e-09	5.252e-07	up	ATF5	activating transcription factor 5 [Source:HGNC Symbol;Acc:HGNC:790]	19	49928702	49933935	q13.33	1
ENSG00000166508	942.073	-0.486957	0.0801137	-6.07833	1.21444e-09	5.462e-07	down	MCM7	minichromosome maintenance complex component 7 [Source:HGNC Symbol;Acc:HGNC:6950]	7	100092728	100101940	q22.1	-1
ENSG00000112759	3760.44	-0.201958	0.0338137	-5.97267	2.33402e-09	1.014e-06	down	SLC29A1	solute carrier family 29 member 1 (Augustine blood group) [Source:HGNC Symbol;Acc:HGNC:11003]	6	44219505	44234151	p21.1	1
ENSG00000137310	453.168	-0.48875	0.0826003	-5.91705	3.2777e-09	1.376e-06	down	TCF19	transcription factor 19 [Source:HGNC Symbol;Acc:HGNC:11629]	6	31158547	31167159	p21.33	1
ENSG00000186635	18896.2	-0.186484	0.0316587	-5.89046	3.85119e-09	1.565e-06	down	ARAP1	ArfGAP with RhoGAP domain, ankyrin repeat and PH domain 1 [Source:HGNC Symbol;Acc:HGNC:16925]	11	72685069	72793599	q13.4	-1
ENSG00000063601	3590.12	-0.211537	0.0361042	-5.85907	4.65456e-09	1.788e-06	down	MTMR1	myotubularin related protein 1 [Source:HGNC Symbol;Acc:HGNC:7449]	X	150692971	150765108	q28	1
ENSG00000160883	32579.7	-0.286271	0.0488688	-5.85796	4.68576e-09	1.788e-06	down	HK3	hexokinase 3 [Source:HGNC Symbol;Acc:HGNC:4925]	5	176880869	176899346	q35.2	-1
ENSG00000166598	14092.1	0.310051	0.0532434	5.82327	5.77083e-09	2.138e-06	up	HSP90B1	heat shock protein 90 beta family member 1 [Source:HGNC Symbol;Acc:HGNC:12028]	12	103930107	103953645	q23.3	1
ENSG00000104687	6168.51	0.234661	0.0405831	5.78223	7.37157e-09	2.653e-06	up	GSR	glutathione-disulfide reductase [Source:HGNC Symbol;Acc:HGNC:4623]	8	30678066	30727846	p12	-1
ENSG00000198431	35944.5	0.251364	0.0437539	5.74496	9.19444e-09	3.217e-06	up	TXNRD1	thioredoxin reductase 1 [Source:HGNC Symbol;Acc:HGNC:12437]	12	104215779	104350307	q23.3	1
ENSG00000186480	3245.09	0.284143	0.0507172	5.60249	2.113e-08	7.192e-06	up	INSIG1	insulin induced gene 1 [Source:HGNC Symbol;Acc:HGNC:6083]	7	155297776	155310235	q36.3	1
ENSG00000133961	14781	-0.214994	0.0388266	-5.53727	3.07225e-08	1.018e-05	down	NUMB	NUMB endocytic adaptor protein [Source:HGNC Symbol;Acc:HGNC:8060]	14	73275107	73458617	q24.3	-1
ENSG00000172936	10984.3	-0.163607	0.0298565	-5.47976	4.25902e-08	1.375e-05	down	MYD88	MYD88 innate immune signal transduction adaptor [Source:HGNC Symbol;Acc:HGNC:7562]	3	38138478	38143022	p22.2	1
ENSG00000122986	2250.77	-0.232693	0.0425718	-5.4659	4.60576e-08	1.45e-05	down	HVCN1	hydrogen voltage gated channel 1 [Source:HGNC Symbol;Acc:HGNC:28240]	12	110627841	110704950	q24.11	-1
ENSG00000040531	4921.73	0.198973	0.0365724	5.44052	5.31248e-08	1.632e-05	up	CTNS	cystinosin, lysosomal cystine transporter [Source:HGNC Symbol;Acc:HGNC:2518]	17	3636468	3661542	p13.2	1
ENSG00000171848	896.11	-0.568359	0.104603	-5.4335	5.52603e-08	1.657e-05	down	RRM2	ribonucleotide reductase regulatory subunit M2 [Source:HGNC Symbol;Acc:HGNC:10452]	2	10120698	10211725	p25.1	1
ENSG00000166923	891.96	0.535807	0.0994531	5.38753	7.14316e-08	2.092e-05	up	GREM1	gremlin 1, DAN family BMP antagonist [Source:HGNC Symbol;Acc:HGNC:2001]	15	32718004	32745106	q13.3	1
ENSG00000163932	12319.1	-0.124471	0.0232527	-5.35296	8.65276e-08	2.477e-05	down	PRKCD	protein kinase C delta [Source:HGNC Symbol;Acc:HGNC:9399]	3	53156009	53192717	p21.1	1
ENSG00000123983	2834.31	0.179054	0.0335726	5.33335	9.64163e-08	2.698e-05	up	ACSL3	acyl-CoA synthetase long chain family member 3 [Source:HGNC Symbol;Acc:HGNC:3570]	2	222860942	222944639	q36.1	1
ENSG00000100297	2141.39	-0.199001	0.0374602	-5.31234	1.08225e-07	2.963e-05	down	MCM5	minichromosome maintenance complex component 5 [Source:HGNC Symbol;Acc:HGNC:6948]	22	35400134	35425431	q12.3	1
ENSG00000138160	242.735	-0.41363	0.078613	-5.26159	1.42815e-07	3.827e-05	down	KIF11	kinesin family member 11 [Source:HGNC Symbol;Acc:HGNC:6388]	10	92593130	92655395	q23.33	1
ENSG00000119514	3461.07	-0.172154	0.032934	-5.22726	1.72039e-07	4.422e-05	down	GALNT12	polypeptide N-acetylgalactosaminyltransferase 12 [Source:HGNC Symbol;Acc:HGNC:19877]	9	98807670	98850081	q22.33	1
ENSG00000151012	5152.54	0.42896	0.0820246	5.22965	1.69836e-07	4.422e-05	up	SLC7A11	solute carrier family 7 member 11 [Source:HGNC Symbol;Acc:HGNC:11059]	4	138164097	138242349	q28.3	-1
ENSG00000143799	3091.09	-0.196433	0.0376897	-5.21185	1.8697e-07	4.709e-05	down	PARP1	poly(ADP-ribose) polymerase 1 [Source:HGNC Symbol;Acc:HGNC:270]	1	226360691	226408093	q42.12	-1
ENSG00000171241	343.018	-0.400259	0.0769403	-5.20219	1.96949e-07	4.863e-05	down	SHCBP1	SHC binding and spindle associated 1 [Source:HGNC Symbol;Acc:HGNC:29547]	16	46578591	46621379	q11.2	-1
ENSG00000004478	1288.54	0.2472	0.0487478	5.071	3.95741e-07	9.585e-05	up	FKBP4	FKBP prolyl isomerase 4 [Source:HGNC Symbol;Acc:HGNC:3720]	12	2794970	2805423	p13.33	1
ENSG00000133048	159080	-0.185213	0.0366573	-5.05254	4.35981e-07	0.0001036	down	CHI3L1	chitinase 3 like 1 [Source:HGNC Symbol;Acc:HGNC:1932]	1	203178931	203186704	q32.1	-1
ENSG00000138964	4536.85	-0.220885	0.0438051	-5.04246	4.59596e-07	0.0001052	down	PARVG	parvin gamma [Source:HGNC Symbol;Acc:HGNC:14654]	22	44172956	44219533	q13.31	1
ENSG00000175305	96.4084	-0.64035	0.126944	-5.04436	4.55032e-07	0.0001052	down	CCNE2	cyclin E2 [Source:HGNC Symbol;Acc:HGNC:1590]	8	94879770	94896678	q22.1	-1
ENSG00000131747	519.564	-0.459629	0.0913487	-5.03159	4.86439e-07	0.0001092	down	TOP2A	DNA topoisomerase II alpha [Source:HGNC Symbol;Acc:HGNC:11989]	17	40388525	40417896	q21.2	-1
ENSG00000160179	1236.51	0.384536	0.0764715	5.02849	4.94367e-07	0.0001092	up	ABCG1	ATP binding cassette subfamily G member 1 [Source:HGNC Symbol;Acc:HGNC:73]	21	42199689	42297244	q22.3	1
ENSG00000090520	1928.09	0.268543	0.0535937	5.01071	5.42287e-07	0.0001178	up	DNAJB11	DnaJ heat shock protein family (Hsp40) member B11 [Source:HGNC Symbol;Acc:HGNC:14889]	3	186567403	186585800	q27.3	1
ENSG00000148180	47311.9	-0.181087	0.0365343	-4.95662	7.17298e-07	0.0001506	down	GSN	gelsolin [Source:HGNC Symbol;Acc:HGNC:4620]	9	121207794	121332843	q33.2	1
ENSG00000148773	2037.05	-0.442561	0.0892706	-4.95752	7.13978e-07	0.0001506	down	MKI67	marker of proliferation Ki-67 [Source:HGNC Symbol;Acc:HGNC:7107]	10	128096659	128126423	q26.2	-1
ENSG00000095002	655.625	-0.2741	0.0554303	-4.94495	7.61632e-07	0.0001572	down	MSH2	mutS homolog 2 [Source:HGNC Symbol;Acc:HGNC:7325]	2	47402969	47663146	p21	1
ENSG00000143067	1633.28	-0.214954	0.0435783	-4.93259	8.11454e-07	0.0001648	down	ZNF697	zinc finger protein 697 [Source:HGNC Symbol;Acc:HGNC:32034]	1	119619377	119648266	p12	-1
ENSG00000129353	3850.59	-0.288135	0.0585846	-4.91827	8.7312e-07	0.0001718	down	SLC44A2	solute carrier family 44 member 2 [Source:HGNC Symbol;Acc:HGNC:17292]	19	10602457	10644557	p13.2	1
ENSG00000165304	172.099	-0.484794	0.0985561	-4.91896	8.70051e-07	0.0001718	down	MELK	maternal embryonic leucine zipper kinase [Source:HGNC Symbol;Acc:HGNC:16870]	9	36572862	36677683	p13.2	1
ENSG00000119321	10365.9	-0.140257	0.0287151	-4.88442	1.03732e-06	0.000201	down	FKBP15	FKBP prolyl isomerase 15 [Source:HGNC Symbol;Acc:HGNC:23397]	9	113161006	113221318	q32	-1
ENSG00000104267	8666.72	-0.207784	0.0428566	-4.84835	1.24493e-06	0.0002376	down	CA2	carbonic anhydrase 2 [Source:HGNC Symbol;Acc:HGNC:1373]	8	85463968	85481493	q21.2	1
ENSG00000101695	599.251	-0.312769	0.0647202	-4.83264	1.34733e-06	0.0002533	down	RNF125	ring finger protein 125 [Source:HGNC Symbol;Acc:HGNC:21150]	18	32018825	32073219	q12.1	1
ENSG00000116701	33022.5	-0.176634	0.0367107	-4.8115	1.49798e-06	0.0002774	down	NCF2	neutrophil cytosolic factor 2 [Source:HGNC Symbol;Acc:HGNC:7661]	1	183555563	183590876	q25.3	-1
ENSG00000138311	384.527	-0.366935	0.0763215	-4.80775	1.52638e-06	0.0002786	down	ZNF365	zinc finger protein 365 [Source:HGNC Symbol;Acc:HGNC:18194]	10	62374192	62670301	q21.2	1
ENSG00000013523	3539.16	-0.137224	0.0285653	-4.80385	1.55644e-06	0.00028	down	ANGEL1	angel homolog 1 [Source:HGNC Symbol;Acc:HGNC:19961]	14	76786168	76826246	q24.3	-1
ENSG00000244242	682.607	0.360582	0.0755483	4.77286	1.81627e-06	0.0003222	up	IFITM10	interferon induced transmembrane protein 10 [Source:HGNC Symbol;Acc:HGNC:40022]	11	1732406	1750595	p15.5	-1
ENSG00000161011	15518.2	0.331744	0.0696572	4.76252	1.91192e-06	0.0003344	up	SQSTM1	sequestosome 1 [Source:HGNC Symbol;Acc:HGNC:11280]	5	179806398	179838078	q35.3	1
ENSG00000145050	795.191	0.409811	0.0861721	4.75572	1.97737e-06	0.0003411	up	MANF	mesencephalic astrocyte derived neurotrophic factor [Source:HGNC Symbol;Acc:HGNC:15461]	3	51385291	51389397	p21.2	1
ENSG00000259590	1882.58	-0.29901	0.0630398	-4.7432	2.1037e-06	0.000358	down	LINC02244	long intergenic non-protein coding RNA 2244 [Source:HGNC Symbol;Acc:HGNC:53929]	15	99395179	99396593	q26.3	-1
ENSG00000143387	2457.81	-0.241445	0.0509507	-4.7388	2.14986e-06	0.000361	down	CTSK	cathepsin K [Source:HGNC Symbol;Acc:HGNC:2536]	1	150796208	150808260	q21.3	-1
ENSG00000163636	1681.04	0.190316	0.0402767	4.7252	2.2989e-06	0.000381	up	PSMD6	proteasome 26S subunit, non-ATPase 6 [Source:HGNC Symbol;Acc:HGNC:9564]	3	64010549	64024010	p14.1	-1
ENSG00000163219	4353.05	-0.152272	0.0324297	-4.69546	2.66007e-06	0.0004351	down	ARHGAP25	Rho GTPase activating protein 25 [Source:HGNC Symbol;Acc:HGNC:28951]	2	68679601	68826833	p13.3	1
ENSG00000137312	1218.19	0.236113	0.0503951	4.68525	2.79624e-06	0.0004515	up	FLOT1	flotillin 1 [Source:HGNC Symbol;Acc:HGNC:3757]	6	30727709	30742732	p21.33	-1
ENSG00000198223	387.364	0.474939	0.101722	4.66898	3.02702e-06	0.0004826	up	CSF2RA	colony stimulating factor 2 receptor alpha subunit [Source:HGNC Symbol;Acc:HGNC:2435]	X	1268800	1310381	p22.33	1
ENSG00000170323	715.836	0.42806	0.0917439	4.66582	3.07395e-06	0.0004839	up	FABP4	fatty acid binding protein 4 [Source:HGNC Symbol;Acc:HGNC:3559]	8	81478419	81483236	q21.13	-1
ENSG00000167680	707.37	0.624324	0.134329	4.64771	3.35646e-06	0.0005219	up	SEMA6B	semaphorin 6B [Source:HGNC Symbol;Acc:HGNC:10739]	19	4542593	4559684	p13.3	-1
ENSG00000132182	3969.64	-0.207317	0.0447949	-4.62813	3.68977e-06	0.0005667	down	NUP210	nucleoporin 210 [Source:HGNC Symbol;Acc:HGNC:30052]	3	13316235	13420322	p25.1	-1
ENSG00000103257	565.636	0.533154	0.115264	4.62552	3.73664e-06	0.000567	up	SLC7A5	solute carrier family 7 member 5 [Source:HGNC Symbol;Acc:HGNC:11063]	16	87830023	87869507	q24.2	-1
ENSG00000214944	418.599	-0.333963	0.0725418	-4.60373	4.14984e-06	0.0006222	down	ARHGEF28	Rho guanine nucleotide exchange factor 28 [Source:HGNC Symbol;Acc:HGNC:30322]	5	73626158	73941993	q13.2	1
ENSG00000171320	126.375	-0.504107	0.110124	-4.57764	4.70241e-06	0.0006967	down	ESCO2	establishment of sister chromatid cohesion N-acetyltransferase 2 [Source:HGNC Symbol;Acc:HGNC:27230]	8	27771949	27812640	p21.1	1
ENSG00000189057	247.221	-0.52054	0.11398	-4.56693	4.94913e-06	0.0007248	down	FAM111B	family with sequence similarity 111 member B [Source:HGNC Symbol;Acc:HGNC:24200]	11	59107185	59127412	q12.1	1
ENSG00000015475	1860.41	0.269287	0.0591246	4.55457	5.2493e-06	0.0007529	up	BID	BH3 interacting domain death agonist [Source:HGNC Symbol;Acc:HGNC:1050]	22	17734138	17774770	q11.21	-1
ENSG00000122952	576.538	-0.365288	0.0802181	-4.55369	5.27138e-06	0.0007529	down	ZWINT	ZW10 interacting kinetochore protein [Source:HGNC Symbol;Acc:HGNC:13195]	10	56357227	56361273	q21.1	-1
ENSG00000138778	222.706	-0.42627	0.0936504	-4.55172	5.32088e-06	0.0007529	down	CENPE	centromere protein E [Source:HGNC Symbol;Acc:HGNC:1856]	4	103105349	103198445	q24	-1
ENSG00000110002	2730.4	0.161487	0.0356158	4.53414	5.784e-06	0.0008062	up	VWA5A	von Willebrand factor A domain containing 5A [Source:HGNC Symbol;Acc:HGNC:6658]	11	124115404	124147721	q24.2	1
ENSG00000145740	2472.11	0.186894	0.0412329	4.53264	5.82503e-06	0.0008062	up	SLC30A5	solute carrier family 30 member 5 [Source:HGNC Symbol;Acc:HGNC:19089]	5	69093949	69131069	q13.1	1
ENSG00000237649	186.857	-0.446739	0.0987917	-4.52203	6.12505e-06	0.0008385	down	KIFC1	kinesin family member C1 [Source:HGNC Symbol;Acc:HGNC:6389]	6	33391823	33409896	p21.32	1
ENSG00000110237	468.798	-0.284358	0.0630632	-4.5091	6.51045e-06	0.0008816	down	ARHGEF17	Rho guanine nucleotide exchange factor 17 [Source:HGNC Symbol;Acc:HGNC:21726]	11	73308276	73369388	q13.4	1
ENSG00000184445	623.09	-0.255953	0.0567931	-4.50677	6.58222e-06	0.0008819	down	KNTC1	kinetochore associated 1 [Source:HGNC Symbol;Acc:HGNC:17255]	12	122527246	122626396	q24.31	1
ENSG00000141506	2395.35	0.196434	0.0436495	4.50026	6.787e-06	0.0008997	up	PIK3R5	phosphoinositide-3-kinase regulatory subunit 5 [Source:HGNC Symbol;Acc:HGNC:30035]	17	8878911	8965712	p13.1	-1
ENSG00000109084	209.125	-0.393594	0.0875348	-4.49644	6.91018e-06	0.0009065	down	TMEM97	transmembrane protein 97 [Source:HGNC Symbol;Acc:HGNC:28106]	17	28319200	28328685	q11.2	1
ENSG00000092853	193.135	-0.396214	0.0882612	-4.48911	7.15222e-06	0.0009286	down	CLSPN	claspin [Source:HGNC Symbol;Acc:HGNC:19715]	1	35720218	35769978	p34.3	-1
ENSG00000133119	190.687	-0.420358	0.0938151	-4.4807	7.43973e-06	0.0009561	down	RFC3	replication factor C subunit 3 [Source:HGNC Symbol;Acc:HGNC:9971]	13	33818069	33966558	q13.2	1
ENSG00000136824	778.862	-0.237614	0.0532401	-4.46307	8.0793e-06	0.001028	down	SMC2	structural maintenance of chromosomes 2 [Source:HGNC Symbol;Acc:HGNC:14011]	9	104094260	104141419	q31.1	1
ENSG00000108100	3227.87	-0.159418	0.0358987	-4.44077	8.96378e-06	0.001129	down	CCNY	cyclin Y [Source:HGNC Symbol;Acc:HGNC:23354]	10	35247025	35572669	p11.21	1
ENSG00000165244	97.3464	-0.608307	0.137518	-4.42346	9.71307e-06	0.001211	down	ZNF367	zinc finger protein 367 [Source:HGNC Symbol;Acc:HGNC:18320]	9	96385941	96418370	q22.32	-1
ENSG00000011426	285.763	-0.459337	0.103948	-4.41891	9.92018e-06	0.001225	down	ANLN	anillin actin binding protein [Source:HGNC Symbol;Acc:HGNC:14082]	7	36389821	36453791	p14.2	1
ENSG00000100219	1773.52	0.33532	0.0760173	4.4111	1.02846e-05	0.001258	up	XBP1	X-box binding protein 1 [Source:HGNC Symbol;Acc:HGNC:12801]	22	28794555	28800597	q12.1	-1
ENSG00000121691	4352.35	-0.138363	0.0313861	-4.40843	1.04124e-05	0.001261	down	CAT	catalase [Source:HGNC Symbol;Acc:HGNC:1516]	11	34438934	34472060	p13	1
ENSG00000101412	256.181	-0.45484	0.103741	-4.38437	1.16324e-05	0.001395	down	E2F1	E2F transcription factor 1 [Source:HGNC Symbol;Acc:HGNC:3113]	20	33675477	33686385	q11.22	-1
ENSG00000095370	746.347	-0.279079	0.0640375	-4.35805	1.31226e-05	0.001559	down	SH2D3C	SH2 domain containing 3C [Source:HGNC Symbol;Acc:HGNC:16884]	9	127738317	127778710	q34.11	-1
ENSG00000113758	513.372	-0.320638	0.0736348	-4.35443	1.33412e-05	0.00157	down	DBN1	drebrin 1 [Source:HGNC Symbol;Acc:HGNC:2695]	5	177456608	177474401	q35.3	-1
ENSG00000167325	1011.58	-0.21407	0.0491936	-4.35158	1.35163e-05	0.001576	down	RRM1	ribonucleotide reductase catalytic subunit M1 [Source:HGNC Symbol;Acc:HGNC:10451]	11	4094707	4138932	p15.4	1
ENSG00000058056	266.778	-0.390337	0.0898346	-4.34506	1.39237e-05	0.001609	down	USP13	ubiquitin specific peptidase 13 [Source:HGNC Symbol;Acc:HGNC:12611]	3	179653040	179789401	q26.33	1
ENSG00000109685	1165.62	-0.193498	0.0445617	-4.34224	1.41037e-05	0.001615	down	NSD2	nuclear receptor binding SET domain protein 2 [Source:HGNC Symbol;Acc:HGNC:12766]	4	1871393	1982207	p16.3	1
ENSG00000204389	1361.22	0.228059	0.0525738	4.33789	1.43857e-05	0.001632	up	HSPA1A	heat shock protein family A (Hsp70) member 1A [Source:HGNC Symbol;Acc:HGNC:5232]	6	31815543	31817946	p21.33	1
ENSG00000196209	401.022	-0.318329	0.0737497	-4.31634	1.58639e-05	0.001784	down	SIRPB2	signal regulatory protein beta 2 [Source:HGNC Symbol;Acc:HGNC:16247]	20	1470741	1491587	p13	-1
ENSG00000143622	2428.63	0.151837	0.0353907	4.2903	1.78434e-05	0.001989	up	RIT1	Ras like without CAAX 1 [Source:HGNC Symbol;Acc:HGNC:10023]	1	155897808	155911404	q22	-1
ENSG00000105755	480.368	-0.282861	0.0661684	-4.27486	1.91254e-05	0.002062	down	ETHE1	ETHE1 persulfide dioxygenase [Source:HGNC Symbol;Acc:HGNC:23287]	19	43506719	43527230	q13.31	-1
ENSG00000148288	371.049	0.319944	0.0747704	4.27903	1.87712e-05	0.002062	up	GBGT1	globoside alpha-1,3-N-acetylgalactosaminyltransferase 1 (FORS blood group) [Source:HGNC Symbol;Acc:HGNC:20460]	9	133152948	133163933	q34.2	-1
ENSG00000165280	11857.8	0.14285	0.0333993	4.27703	1.89407e-05	0.002062	up	VCP	valosin containing protein [Source:HGNC Symbol;Acc:HGNC:12666]	9	35056064	35072627	p13.3	-1
ENSG00000167613	3546.98	0.172592	0.0403772	4.27448	1.91582e-05	0.002062	up	LAIR1	leukocyte associated immunoglobulin like receptor 1 [Source:HGNC Symbol;Acc:HGNC:6477]	19	54351384	54370558	q13.42	-1
ENSG00000196730	4656.98	-0.127453	0.0298423	-4.27089	1.94696e-05	0.002078	down	DAPK1	death associated protein kinase 1 [Source:HGNC Symbol;Acc:HGNC:2674]	9	87497228	87708634	q21.33	1
ENSG00000139178	218.179	0.440134	0.103147	4.26704	1.98086e-05	0.002096	up	C1RL	complement C1r subcomponent like [Source:HGNC Symbol;Acc:HGNC:21265]	12	7089587	7109238	p13.31	-1
ENSG00000121073	996.159	0.274801	0.0645548	4.25686	2.07318e-05	0.002176	up	SLC35B1	solute carrier family 35 member B1 [Source:HGNC Symbol;Acc:HGNC:20798]	17	49700934	49709014	q21.33	-1
ENSG00000176953	1324.85	-0.185716	0.0437683	-4.24318	2.20378e-05	0.002294	down	NFATC2IP	nuclear factor of activated T cells 2 interacting protein [Source:HGNC Symbol;Acc:HGNC:25906]	16	28950807	28967097	p11.2	1
ENSG00000111144	11395	-0.171083	0.0404447	-4.23006	2.33628e-05	0.002388	down	LTA4H	leukotriene A4 hydrolase [Source:HGNC Symbol;Acc:HGNC:6710]	12	96000753	96043520	q23.1	-1
ENSG00000116062	812.257	-0.221711	0.0524172	-4.22973	2.33974e-05	0.002388	down	MSH6	mutS homolog 6 [Source:HGNC Symbol;Acc:HGNC:7329]	2	47695530	47810101	p16.3	1
ENSG00000143476	187.01	-0.458834	0.108505	-4.22867	2.35073e-05	0.002388	down	DTL	denticleless E3 ubiquitin protein ligase homolog [Source:HGNC Symbol;Acc:HGNC:30288]	1	212035553	212107400	q32.3	1
ENSG00000049541	546.59	-0.232264	0.0549936	-4.22348	2.40561e-05	0.002424	down	RFC2	replication factor C subunit 2 [Source:HGNC Symbol;Acc:HGNC:9970]	7	74231499	74254458	q11.23	-1
ENSG00000127022	20283.5	0.202954	0.0480945	4.2199	2.44407e-05	0.002424	up	CANX	calnexin [Source:HGNC Symbol;Acc:HGNC:1473]	5	179678628	179731641	q35.3	1
ENSG00000150977	2395.6	0.176001	0.0417052	4.22013	2.44165e-05	0.002424	up	RILPL2	Rab interacting lysosomal protein like 2 [Source:HGNC Symbol;Acc:HGNC:28787]	12	123410683	123436717	q24.31	-1
ENSG00000160796	5930.77	-0.24833	0.0589738	-4.21085	2.54408e-05	0.00249	down	NBEAL2	neurobeachin like 2 [Source:HGNC Symbol;Acc:HGNC:31928]	3	46979683	47009704	p21.31	1
ENSG00000198363	3792.37	0.155099	0.0368377	4.21032	2.55005e-05	0.00249	up	ASPH	aspartate beta-hydroxylase [Source:HGNC Symbol;Acc:HGNC:757]	8	61500556	61714640	q12.3	-1
ENSG00000023909	584.562	0.292224	0.0694897	4.20529	2.6075e-05	0.002517	up	GCLM	glutamate-cysteine ligase modifier subunit [Source:HGNC Symbol;Acc:HGNC:4312]	1	93885199	93909456	p22.1	-1
ENSG00000100600	2077.38	0.199978	0.0475639	4.2044	2.61774e-05	0.002517	up	LGMN	legumain [Source:HGNC Symbol;Acc:HGNC:9472]	14	92703807	92748679	q32.12	-1
ENSG00000101161	2310.56	-0.147109	0.0350576	-4.1962	2.7143e-05	0.00257	down	PRPF6	pre-mRNA processing factor 6 [Source:HGNC Symbol;Acc:HGNC:15860]	20	63981132	64033100	q13.33	1
ENSG00000120756	366.007	-0.359792	0.0857346	-4.19658	2.7098e-05	0.00257	down	PLS1	plastin 1 [Source:HGNC Symbol;Acc:HGNC:9090]	3	142596393	142713664	q23	1
ENSG00000074181	1099.05	0.353403	0.0843148	4.19147	2.77159e-05	0.002605	up	NOTCH3	notch receptor 3 [Source:HGNC Symbol;Acc:HGNC:7883]	19	15159038	15200995	p13.12	-1
ENSG00000110880	24427.2	-0.156576	0.0373835	-4.18836	2.80978e-05	0.002606	down	CORO1C	coronin 1C [Source:HGNC Symbol;Acc:HGNC:2254]	12	108645109	108731596	q24.11	-1
ENSG00000152465	482.346	0.312874	0.074707	4.18802	2.81397e-05	0.002606	up	NMT2	N-myristoyltransferase 2 [Source:HGNC Symbol;Acc:HGNC:7858]	10	15102584	15168693	p13	-1
ENSG00000079393	671.834	0.334426	0.0799018	4.18547	2.8458e-05	0.002616	up	DUSP13	dual specificity phosphatase 13 [Source:HGNC Symbol;Acc:HGNC:19681]	10	75094432	75109221	q22.2	-1
ENSG00000023318	2100.54	0.18657	0.0446625	4.17733	2.9495e-05	0.002669	up	ERP44	endoplasmic reticulum protein 44 [Source:HGNC Symbol;Acc:HGNC:18311]	9	99979185	100099000	q31.1	-1
ENSG00000096384	26661.5	0.119876	0.0287174	4.17434	2.98858e-05	0.002669	up	HSP90AB1	heat shock protein 90 alpha family class B member 1 [Source:HGNC Symbol;Acc:HGNC:5258]	6	44246166	44253888	p21.1	1
ENSG00000120438	2918.07	0.151228	0.0361941	4.17824	2.93774e-05	0.002669	up	TCP1	t-complex 1 [Source:HGNC Symbol;Acc:HGNC:11655]	6	159778498	159789703	q25.3	-1
ENSG00000137812	176.02	-0.427535	0.102391	-4.1755	2.97329e-05	0.002669	down	KNL1	kinetochore scaffold 1 [Source:HGNC Symbol;Acc:HGNC:24054]	15	40594020	40664342	q15.1	1
ENSG00000187037	474.344	-0.352218	0.0844084	-4.17278	3.009e-05	0.002669	down	GPR141	G protein-coupled receptor 141 [Source:HGNC Symbol;Acc:HGNC:19997]	7	37683796	37833788	p14.1	1
ENSG00000130766	992.386	0.231561	0.0556785	4.1589	3.19786e-05	0.002816	up	SESN2	sestrin 2 [Source:HGNC Symbol;Acc:HGNC:20746]	1	28259518	28282491	p35.3	1
ENSG00000203880	544.036	-0.223134	0.0541623	-4.11973	3.79318e-05	0.003317	down	PCMTD2	protein-L-isoaspartate (D-aspartate) O-methyltransferase domain containing 2 [Source:HGNC Symbol;Acc:HGNC:15882]	20	64255695	64287821	q13.33	1
ENSG00000114480	1524.51	0.176242	0.0428198	4.11591	3.85662e-05	0.00335	up	GBE1	1,4-alpha-glucan branching enzyme 1 [Source:HGNC Symbol;Acc:HGNC:4180]	3	81489703	81761645	p12.2	-1
ENSG00000167900	485.311	-0.42341	0.102934	-4.11341	3.89854e-05	0.003363	down	TK1	thymidine kinase 1 [Source:HGNC Symbol;Acc:HGNC:11830]	17	78174091	78187233	q25.3	-1
ENSG00000088305	132.757	-0.483908	0.117986	-4.1014	4.10661e-05	0.003494	down	DNMT3B	DNA methyltransferase 3 beta [Source:HGNC Symbol;Acc:HGNC:2979]	20	32762385	32809356	q11.21	1
ENSG00000092470	156.052	-0.453342	0.110575	-4.09986	4.13395e-05	0.003494	down	WDR76	WD repeat domain 76 [Source:HGNC Symbol;Acc:HGNC:25773]	15	43826980	43868412	q15.3	1
ENSG00000165029	2664.38	0.317896	0.0775205	4.1008	4.11723e-05	0.003494	up	ABCA1	ATP binding cassette subfamily A member 1 [Source:HGNC Symbol;Acc:HGNC:29]	9	104781006	104928155	q31.1	-1
ENSG00000242474	794.34	-0.266606	0.0651684	-4.09103	4.29463e-05	0.003606	down		novel transcript	7	135853	149527	p22.3	-1
ENSG00000116741	213.998	-0.353553	0.0865039	-4.08714	4.36728e-05	0.003642	down	RGS2	regulator of G protein signaling 2 [Source:HGNC Symbol;Acc:HGNC:9998]	1	192809039	192812275	q31.2	1
ENSG00000168496	586.266	-0.258359	0.0634217	-4.07368	4.62765e-05	0.003809	down	FEN1	flap structure-specific endonuclease 1 [Source:HGNC Symbol;Acc:HGNC:3650]	11	61792911	61797238	q12.2	1
ENSG00000177084	690.375	-0.211729	0.0519671	-4.0743	4.61537e-05	0.003809	down	POLE	DNA polymerase epsilon, catalytic subunit [Source:HGNC Symbol;Acc:HGNC:9177]	12	132623753	132687376	q24.33	-1
ENSG00000063438	143.611	0.443745	0.109016	4.07047	4.69185e-05	0.003829	up	AHRR	aryl-hydrocarbon receptor repressor [Source:HGNC Symbol;Acc:HGNC:346]	5	321759	435110	p15.33	1
ENSG00000162607	569.291	-0.220003	0.0540818	-4.06796	4.74266e-05	0.003829	down	USP1	ubiquitin specific peptidase 1 [Source:HGNC Symbol;Acc:HGNC:12607]	1	62436297	62451804	p31.3	1
ENSG00000167797	589.729	0.410833	0.100965	4.06906	4.72038e-05	0.003829	up	CDK2AP2	cyclin dependent kinase 2 associated protein 2 [Source:HGNC Symbol;Acc:HGNC:30833]	11	67506497	67508649	q13.2	-1
ENSG00000028528	5902.33	-0.12851	0.0316054	-4.06606	4.78148e-05	0.003836	down	SNX1	sorting nexin 1 [Source:HGNC Symbol;Acc:HGNC:11172]	15	64094123	64146090	q22.31	1
ENSG00000131669	2756.84	0.320787	0.0789633	4.06248	4.85535e-05	0.00387	up	NINJ1	ninjurin 1 [Source:HGNC Symbol;Acc:HGNC:7824]	9	93121496	93134251	q22.31	-1
ENSG00000221829	201.929	-0.36636	0.090405	-4.05243	5.06873e-05	0.004015	down	FANCG	FA complementation group G [Source:HGNC Symbol;Acc:HGNC:3588]	9	35073835	35080016	p13.3	-1
ENSG00000114737	1277.36	0.184056	0.0455054	4.04471	5.23884e-05	0.004115	up	CISH	cytokine inducible SH2 containing protein [Source:HGNC Symbol;Acc:HGNC:1984]	3	50606490	50611831	p21.2	-1
ENSG00000153885	154.707	-0.411131	0.101671	-4.04375	5.26038e-05	0.004115	down	KCTD15	potassium channel tetramerization domain containing 15 [Source:HGNC Symbol;Acc:HGNC:23297]	19	33795933	33815763	q13.11	1
ENSG00000147162	4348.18	-0.147912	0.0366221	-4.03887	5.371e-05	0.004175	down	OGT	O-linked N-acetylglucosamine (GlcNAc) transferase [Source:HGNC Symbol;Acc:HGNC:8127]	X	71533104	71575892	q13.1	1
ENSG00000147180	73.837	-0.615032	0.152421	-4.03508	5.45829e-05	0.004206	down	ZNF711	zinc finger protein 711 [Source:HGNC Symbol;Acc:HGNC:13128]	X	85244032	85273362	q21.1	1
ENSG00000157510	4600.73	-0.157977	0.0391587	-4.03427	5.47717e-05	0.004206	down	AFAP1L1	actin filament associated protein 1 like 1 [Source:HGNC Symbol;Acc:HGNC:26714]	5	149271859	149343637	q32	1
ENSG00000173692	4068.83	0.13533	0.0335807	4.03	5.57761e-05	0.004257	up	PSMD1	proteasome 26S subunit, non-ATPase 1 [Source:HGNC Symbol;Acc:HGNC:9554]	2	231056864	231172827	q37.1	1
ENSG00000158715	618.148	-0.284187	0.0706213	-4.0241	5.71929e-05	0.004339	down	SLC45A3	solute carrier family 45 member 3 [Source:HGNC Symbol;Acc:HGNC:8642]	1	205657851	205680509	q32.1	-1
ENSG00000068489	330.691	-0.298781	0.0743652	-4.01775	5.87553e-05	0.004367	down	PRR11	proline rich 11 [Source:HGNC Symbol;Acc:HGNC:25619]	17	59155499	59204705	q22	1
ENSG00000085449	3885.25	-0.131937	0.0328451	-4.01696	5.89545e-05	0.004367	down	WDFY1	WD repeat and FYVE domain containing 1 [Source:HGNC Symbol;Acc:HGNC:20451]	2	223855716	223945357	q36.1	-1
ENSG00000150593	1278.91	-0.223866	0.0556889	-4.01994	5.82133e-05	0.004367	down	PDCD4	programmed cell death 4 [Source:HGNC Symbol;Acc:HGNC:8763]	10	110871795	110900006	q25.2	1
ENSG00000276043	129.472	-0.510389	0.126999	-4.01885	5.84833e-05	0.004367	down	UHRF1	ubiquitin like with PHD and ring finger domains 1 [Source:HGNC Symbol;Acc:HGNC:12556]	19	4903080	4962154	p13.3	1
ENSG00000158683	731.92	-0.257596	0.0642116	-4.01168	6.02889e-05	0.00444	down	PKD1L1	polycystin 1 like 1, transient receptor potential channel interacting [Source:HGNC Symbol;Acc:HGNC:18053]	7	47740202	47948491	p12.3	-1
ENSG00000184371	55209.6	0.242451	0.0604747	4.00913	6.0943e-05	0.004462	up	CSF1	colony stimulating factor 1 [Source:HGNC Symbol;Acc:HGNC:2432]	1	109910242	109930992	p13.3	1
ENSG00000070669	158.387	0.575375	0.144086	3.99328	6.51651e-05	0.004744	up	ASNS	asparagine synthetase (glutamine-hydrolyzing) [Source:HGNC Symbol;Acc:HGNC:753]	7	97851677	97872542	q21.3	-1
ENSG00000164104	468.085	-0.327629	0.0823722	-3.97742	6.96661e-05	0.005014	down	HMGB2	high mobility group box 2 [Source:HGNC Symbol;Acc:HGNC:5000]	4	173331376	173334432	q34.1	-1
ENSG00000165915	1950.29	0.219531	0.055195	3.97738	6.9679e-05	0.005014	up	SLC39A13	solute carrier family 39 member 13 [Source:HGNC Symbol;Acc:HGNC:20859]	11	47407132	47416496	p11.2	1
ENSG00000228486	856.452	-0.348325	0.0879059	-3.96248	7.41764e-05	0.005308	down	C2orf92	chromosome 2 open reading frame 92 [Source:HGNC Symbol;Acc:HGNC:49272]	2	97664217	97703064	q11.2	1
ENSG00000095303	1225.24	0.218142	0.055107	3.95852	7.54161e-05	0.005326	up	PTGS1	prostaglandin-endoperoxide synthase 1 [Source:HGNC Symbol;Acc:HGNC:9604]	9	122370530	122395703	q33.2	1
ENSG00000145386	220.491	-0.40612	0.102589	-3.95871	7.53549e-05	0.005326	down	CCNA2	cyclin A2 [Source:HGNC Symbol;Acc:HGNC:1578]	4	121816444	121823933	q27	-1
ENSG00000170312	250.433	-0.457485	0.115596	-3.95763	7.56967e-05	0.005326	down	CDK1	cyclin dependent kinase 1 [Source:HGNC Symbol;Acc:HGNC:1722]	10	60778331	60794852	q21.2	1
ENSG00000188428	711.583	-0.218496	0.0556029	-3.92957	8.50966e-05	0.005954	down	BLOC1S5	biogenesis of lysosomal organelles complex 1 subunit 5 [Source:HGNC Symbol;Acc:HGNC:18561]	6	8013567	8064396	p24.3	-1
ENSG00000065833	755.941	0.247779	0.0633134	3.91353	9.0956e-05	0.006296	up	ME1	malic enzyme 1 [Source:HGNC Symbol;Acc:HGNC:6983]	6	83210402	83431051	q14.2	-1
ENSG00000113657	909.273	0.375962	0.0961335	3.91083	9.19793e-05	0.006296	up	DPYSL3	dihydropyrimidinase like 3 [Source:HGNC Symbol;Acc:HGNC:3015]	5	147390808	147510068	q32	-1
ENSG00000125885	240.562	-0.33381	0.0853389	-3.91158	9.1693e-05	0.006296	down	MCM8	minichromosome maintenance 8 homologous recombination repair factor [Source:HGNC Symbol;Acc:HGNC:16147]	20	5950652	5998977	p12.3	1
ENSG00000158714	5528.61	-0.162933	0.0416389	-3.913	9.11547e-05	0.006296	down	SLAMF8	SLAM family member 8 [Source:HGNC Symbol;Acc:HGNC:21391]	1	159826811	159837492	q23.2	1
ENSG00000137804	353.226	-0.307858	0.0787634	-3.90864	9.28181e-05	0.006319	down	NUSAP1	nucleolar and spindle associated protein 1 [Source:HGNC Symbol;Acc:HGNC:18538]	15	41320794	41381050	q15.1	1
ENSG00000137976	1007.06	-0.233543	0.0598492	-3.90219	9.53266e-05	0.006455	down	DNASE2B	deoxyribonuclease 2 beta [Source:HGNC Symbol;Acc:HGNC:28875]	1	84398532	84415018	p31.1	1
ENSG00000082212	2685.22	0.122609	0.0314671	3.89643	9.76208e-05	0.006505	up	ME2	malic enzyme 2 [Source:HGNC Symbol;Acc:HGNC:6984]	18	50879080	50954257	q21.2	1
ENSG00000187741	920.931	-0.198997	0.0510689	-3.89664	9.7535e-05	0.006505	down	FANCA	FA complementation group A [Source:HGNC Symbol;Acc:HGNC:3582]	16	89737549	89816657	q24.3	-1
ENSG00000259760	2101.86	-0.307417	0.0788892	-3.89682	9.74633e-05	0.006505	down		novel transcript, antisense to LRRC28	15	99396613	99401315	q26.3	-1
ENSG00000114770	1080.37	0.191576	0.0492345	3.89109	9.97955e-05	0.00658	up	ABCC5	ATP binding cassette subfamily C member 5 [Source:HGNC Symbol;Acc:HGNC:56]	3	183919934	184017939	q27.1	-1
ENSG00000166851	140.865	-0.457191	0.117471	-3.89196	9.94368e-05	0.00658	down	PLK1	polo like kinase 1 [Source:HGNC Symbol;Acc:HGNC:9077]	16	23677656	23690367	p12.2	1
ENSG00000151725	242.202	-0.378951	0.0974742	-3.88771	0.000101195	0.006638	down	CENPU	centromere protein U [Source:HGNC Symbol;Acc:HGNC:21348]	4	184694085	184734130	q35.1	-1
ENSG00000219200	169.507	-0.38626	0.0994883	-3.88247	0.000103402	0.006747	down	RNASEK	ribonuclease K [Source:HGNC Symbol;Acc:HGNC:33911]	17	7012417	7014532	p13.1	1
ENSG00000154429	1244.47	-0.199752	0.0515971	-3.87137	0.000108224	0.007026	down	CCSAP	centriole, cilia and spindle associated protein [Source:HGNC Symbol;Acc:HGNC:29578]	1	229321011	229343294	q42.13	-1
ENSG00000142945	130.973	-0.469069	0.121347	-3.86554	0.000110846	0.007159	down	KIF2C	kinesin family member 2C [Source:HGNC Symbol;Acc:HGNC:6393]	1	44739818	44767767	p34.1	1
ENSG00000127951	771.06	-0.32154	0.083222	-3.86364	0.000111709	0.007178	down	FGL2	fibrinogen like 2 [Source:HGNC Symbol;Acc:HGNC:3696]	7	77193369	77199848	q11.23	-1
ENSG00000168918	2490.05	-0.185003	0.0479083	-3.8616	0.000112648	0.007201	down	INPP5D	inositol polyphosphate-5-phosphatase D [Source:HGNC Symbol;Acc:HGNC:6079]	2	233059967	233207903	q37.1	1
ENSG00000178860	2559.26	0.271935	0.0705331	3.85542	0.000115529	0.007311	up	MSC	musculin [Source:HGNC Symbol;Acc:HGNC:7321]	8	71841549	71844468	q13.3	-1
ENSG00000183250	258.319	0.402573	0.104398	3.85613	0.000115195	0.007311	up	LINC01547	long intergenic non-protein coding RNA 1547 [Source:HGNC Symbol;Acc:HGNC:15707]	21	44932814	44939937	q22.3	-1
ENSG00000122729	13592.7	-0.184662	0.048023	-3.84528	0.000120415	0.007583	down	ACO1	aconitase 1 [Source:HGNC Symbol;Acc:HGNC:117]	9	32384603	32454769	p21.1	1
ENSG00000101057	313.048	-0.339299	0.0883878	-3.83875	0.000123663	0.00771	down	MYBL2	MYB proto-oncogene like 2 [Source:HGNC Symbol;Acc:HGNC:7548]	20	43667019	43716495	q13.12	1
ENSG00000159374	265.218	-0.305887	0.0796802	-3.83893	0.000123571	0.00771	down	M1AP	meiosis 1 associated protein [Source:HGNC Symbol;Acc:HGNC:25183]	2	74557883	74648338	p13.1	-1
ENSG00000165795	1653.33	-0.286451	0.0746476	-3.83738	0.000124353	0.007715	down	NDRG2	NDRG family member 2 [Source:HGNC Symbol;Acc:HGNC:14460]	14	21016763	21070872	q11.2	-1
ENSG00000105173	235.811	-0.333592	0.0874222	-3.81587	0.000135704	0.008378	down	CCNE1	cyclin E1 [Source:HGNC Symbol;Acc:HGNC:1589]	19	29811991	29824312	q12	1
ENSG00000181019	1552.12	0.18947	0.049693	3.81281	0.000137396	0.008441	up	NQO1	NAD(P)H quinone dehydrogenase 1 [Source:HGNC Symbol;Acc:HGNC:2874]	16	69706996	69726668	q22.1	-1
ENSG00000144554	262.555	-0.295048	0.0774116	-3.81141	0.000138175	0.008447	down	FANCD2	FA complementation group D2 [Source:HGNC Symbol;Acc:HGNC:3585]	3	10026414	10101930	p25.3	1
ENSG00000196187	6841.94	-0.137097	0.036068	-3.80106	0.000144079	0.008724	down	TMEM63A	transmembrane protein 63A [Source:HGNC Symbol;Acc:HGNC:29118]	1	225845536	225882380	q42.12	-1
ENSG00000255197	295.975	-0.354432	0.093242	-3.8012	0.000143996	0.008724	down		novel transcript	11	47381509	47409369	p11.2	-1
ENSG00000079785	1638.15	0.151643	0.0399213	3.79855	0.000145547	0.00877	up	DDX1	DEAD-box helicase 1 [Source:HGNC Symbol;Acc:HGNC:2734]	2	15591178	15631111	p24.3	1
ENSG00000147650	1252.44	0.230906	0.0608458	3.79494	0.000147679	0.008815	up	LRP12	LDL receptor related protein 12 [Source:HGNC Symbol;Acc:HGNC:31708]	8	104489231	104589024	q22.3	-1
ENSG00000148154	1985.99	0.158029	0.0416353	3.79555	0.000147319	0.008815	up	UGCG	UDP-glucose ceramide glucosyltransferase [Source:HGNC Symbol;Acc:HGNC:12524]	9	111896814	111935369	q31.3	1
ENSG00000119403	419.198	-0.231707	0.061243	-3.7834	0.000154697	0.00919	down	PHF19	PHD finger protein 19 [Source:HGNC Symbol;Acc:HGNC:24566]	9	120855651	120894896	q33.2	-1
ENSG00000102870	488.26	0.248283	0.0656929	3.77944	0.00015718	0.009294	up	ZNF629	zinc finger protein 629 [Source:HGNC Symbol;Acc:HGNC:29008]	16	30778456	30787205	p11.2	-1
ENSG00000137225	316.812	-0.356937	0.0945442	-3.77535	0.000159785	0.009403	down	CAPN11	calpain 11 [Source:HGNC Symbol;Acc:HGNC:1478]	6	44158811	44184401	p21.1	1
ENSG00000100296	1146.81	-0.167616	0.0445955	-3.75859	0.000170875	0.009963	down	THOC5	THO complex 5 [Source:HGNC Symbol;Acc:HGNC:19074]	22	29505879	29555216	q12.2	-1
ENSG00000198901	193.836	-0.414565	0.110289	-3.75891	0.000170655	0.009963	down	PRC1	protein regulator of cytokinesis 1 [Source:HGNC Symbol;Acc:HGNC:9341]	15	90966040	90995629	q26.1	-1
ENSG00000138135	76.0278	0.678183	0.180675	3.75361	0.000174303	0.01011	up	CH25H	cholesterol 25-hydroxylase [Source:HGNC Symbol;Acc:HGNC:1907]	10	89205629	89207317	q23.31	-1
ENSG00000261269	1872.16	-0.215209	0.0573484	-3.75266	0.000174968	0.01011	down		novel transcript, overlapping ZNF366	5	72439903	72442387	q13.2	-1
ENSG00000051341	188.16	-0.359103	0.0957976	-3.74856	0.000177851	0.01023	down	POLQ	DNA polymerase theta [Source:HGNC Symbol;Acc:HGNC:9186]	3	121431427	121546641	q13.33	-1
ENSG00000106638	834.448	0.198528	0.0531464	3.73549	0.000187348	0.01072	up	TBL2	transducin beta like 2 [Source:HGNC Symbol;Acc:HGNC:11586]	7	73567537	73578791	q11.23	-1
ENSG00000090861	3136.92	0.178419	0.0477864	3.73368	0.000188701	0.01075	up	AARS	alanyl-tRNA synthetase [Source:HGNC Symbol;Acc:HGNC:20]	16	70252295	70289543	q22.1	-1
ENSG00000163131	83263.9	-0.138331	0.0370675	-3.73187	0.000190064	0.01078	down	CTSS	cathepsin S [Source:HGNC Symbol;Acc:HGNC:2545]	1	150730188	150765792	q21.3	-1
ENSG00000136868	8472.48	-0.148099	0.0397325	-3.72741	0.000193458	0.01093	down	SLC31A1	solute carrier family 31 member 1 [Source:HGNC Symbol;Acc:HGNC:11016]	9	113221544	113264492	q32	1
ENSG00000124766	607.476	-0.257902	0.0692806	-3.72257	0.000197208	0.01104	down	SOX4	SRY-box transcription factor 4 [Source:HGNC Symbol;Acc:HGNC:11200]	6	21593751	21598619	p22.3	1
ENSG00000134242	1467.55	-0.178806	0.0480283	-3.72293	0.000196923	0.01104	down	PTPN22	protein tyrosine phosphatase non-receptor type 22 [Source:HGNC Symbol;Acc:HGNC:9652]	1	113813811	113871753	p13.2	-1
ENSG00000132383	2267.43	-0.150696	0.0405281	-3.71831	0.000200559	0.01113	down	RPA1	replication protein A1 [Source:HGNC Symbol;Acc:HGNC:10289]	17	1829702	1900082	p13.3	1
ENSG00000164211	2228.46	0.180143	0.0484479	3.71828	0.000200582	0.01113	up	STARD4	StAR related lipid transfer domain containing 4 [Source:HGNC Symbol;Acc:HGNC:18058]	5	111496033	111512590	q22.1	-1
ENSG00000177706	5994.17	0.22808	0.061382	3.71575	0.0002026	0.01119	up	FAM20C	FAM20C golgi associated secretory pathway kinase [Source:HGNC Symbol;Acc:HGNC:22140]	7	192571	260772	p22.3	1
ENSG00000197548	4099.66	-0.150098	0.0404229	-3.7132	0.000204658	0.01126	down	ATG7	autophagy related 7 [Source:HGNC Symbol;Acc:HGNC:16935]	3	11272309	11557665	p25.3	1
ENSG00000094804	212.971	-0.357941	0.0965129	-3.70874	0.000208292	0.01136	down	CDC6	cell division cycle 6 [Source:HGNC Symbol;Acc:HGNC:1744]	17	40287879	40304657	q21.2	1
ENSG00000166922	724.806	0.307293	0.0828322	3.70983	0.000207398	0.01136	up	SCG5	secretogranin V [Source:HGNC Symbol;Acc:HGNC:10816]	15	32641676	32697098	q13.3	1
ENSG00000239998	2868.56	-0.168727	0.0455414	-3.70491	0.000211463	0.01148	down	LILRA2	leukocyte immunoglobulin like receptor A2 [Source:HGNC Symbol;Acc:HGNC:6603]	19	54572920	54590287	q13.42	1
ENSG00000089685	153.995	-0.510583	0.137985	-3.70028	0.000215363	0.01164	down	BIRC5	baculoviral IAP repeat containing 5 [Source:HGNC Symbol;Acc:HGNC:593]	17	78214186	78225636	q25.3	1
ENSG00000109805	164.523	-0.536034	0.145146	-3.69306	0.000221569	0.01191	down	NCAPG	non-SMC condensin I complex subunit G [Source:HGNC Symbol;Acc:HGNC:24304]	4	17810979	17844865	p15.31	1
ENSG00000114738	5654.47	0.096743	0.0262041	3.6919	0.000222583	0.01191	up	MAPKAPK3	MAPK activated protein kinase 3 [Source:HGNC Symbol;Acc:HGNC:6888]	3	50611520	50649291	p21.2	1
ENSG00000163050	1084.47	-0.170609	0.0462212	-3.69115	0.000223242	0.01191	down	COQ8A	coenzyme Q8A [Source:HGNC Symbol;Acc:HGNC:16812]	1	226897536	226987545	q42.13	1
ENSG00000111206	153.488	-0.385335	0.104566	-3.68509	0.000228626	0.01211	down	FOXM1	forkhead box M1 [Source:HGNC Symbol;Acc:HGNC:3818]	12	2857681	2877155	p13.33	-1
ENSG00000127948	2322.49	0.195363	0.0530172	3.6849	0.000228796	0.01211	up	POR	cytochrome p450 oxidoreductase [Source:HGNC Symbol;Acc:HGNC:9208]	7	75899200	75986855	q11.23	1
ENSG00000007968	171.928	-0.395898	0.107689	-3.67632	0.000236621	0.01247	down	E2F2	E2F transcription factor 2 [Source:HGNC Symbol;Acc:HGNC:3114]	1	23506438	23531233	p36.12	-1
ENSG00000198829	4134.44	0.182	0.0495326	3.67434	0.000238464	0.01251	up	SUCNR1	succinate receptor 1 [Source:HGNC Symbol;Acc:HGNC:4542]	3	151873643	151884619	q25.1	1
ENSG00000059804	957.768	0.279736	0.0763078	3.66589	0.000246482	0.01288	up	SLC2A3	solute carrier family 2 member 3 [Source:HGNC Symbol;Acc:HGNC:11007]	12	7919230	7936187	p13.31	-1
ENSG00000100055	7993.39	-0.0925541	0.0253177	-3.65572	0.000256466	0.01324	down	CYTH4	cytohesin 4 [Source:HGNC Symbol;Acc:HGNC:9505]	22	37282027	37315341	q13.1	1
ENSG00000146918	503.711	-0.235851	0.0645113	-3.65596	0.00025622	0.01324	down	NCAPG2	non-SMC condensin II complex subunit G2 [Source:HGNC Symbol;Acc:HGNC:21904]	7	158631169	158704804	q36.3	-1
ENSG00000159259	117.326	-0.400702	0.109606	-3.65586	0.000256321	0.01324	down	CHAF1B	chromatin assembly factor 1 subunit B [Source:HGNC Symbol;Acc:HGNC:1911]	21	36385392	36419015	q22.12	1
ENSG00000108448	44.3833	0.770843	0.21098	3.65362	0.000258564	0.01329	up	TRIM16L	tripartite motif containing 16 like [Source:HGNC Symbol;Acc:HGNC:32670]	17	18697998	18736118	p11.2	1
ENSG00000178175	2874.96	-0.185485	0.0507868	-3.65223	0.00025997	0.01331	down	ZNF366	zinc finger protein 366 [Source:HGNC Symbol;Acc:HGNC:18316]	5	72439903	72507410	q13.2	-1
ENSG00000011083	241.529	-0.342298	0.0938043	-3.64906	0.0002632	0.01337	down	SLC6A7	solute carrier family 6 member 7 [Source:HGNC Symbol;Acc:HGNC:11054]	5	150190062	150222788	q32	1
ENSG00000113810	683.425	-0.222479	0.0609667	-3.64919	0.000263065	0.01337	down	SMC4	structural maintenance of chromosomes 4 [Source:HGNC Symbol;Acc:HGNC:14013]	3	160399274	160434954	q25.33	1
ENSG00000008382	1359.93	-0.227094	0.0623366	-3.64303	0.000269448	0.01363	down	MPND	MPN domain containing [Source:HGNC Symbol;Acc:HGNC:25934]	19	4343527	4360086	p13.3	1
ENSG00000116830	603.306	-0.194023	0.0534202	-3.63202	0.000281212	0.01417	down	TTF2	transcription termination factor 2 [Source:HGNC Symbol;Acc:HGNC:12398]	1	117060326	117107453	p13.1	1
ENSG00000108344	3107.2	0.166093	0.0458673	3.62117	0.000293273	0.01466	up	PSMD3	proteasome 26S subunit, non-ATPase 3 [Source:HGNC Symbol;Acc:HGNC:9560]	17	39980807	39997959	q21.1	1
ENSG00000136250	1192.74	-0.191976	0.0530117	-3.62139	0.00029302	0.01466	down	AOAH	acyloxyacyl hydrolase [Source:HGNC Symbol;Acc:HGNC:548]	7	36512941	36724549	p14.2	-1
ENSG00000240859	1514.8	-0.175109	0.0483809	-3.6194	0.000295291	0.0147	down		novel transcript	7	149549	155465	p22.3	1
ENSG00000167701	133.437	-0.405788	0.112194	-3.61686	0.000298204	0.01479	down	GPT	glutamic--pyruvic transaminase [Source:HGNC Symbol;Acc:HGNC:4552]	8	144502973	144507174	q24.3	1
ENSG00000175455	782.507	-0.195191	0.0540871	-3.60883	0.000307576	0.01519	down	CCDC14	coiled-coil domain containing 14 [Source:HGNC Symbol;Acc:HGNC:25766]	3	123897305	123961408	q21.1	-1
ENSG00000117868	2347.03	0.116081	0.0321862	3.60655	0.0003103	0.01521	up	ESYT2	extended synaptotagmin 2 [Source:HGNC Symbol;Acc:HGNC:22211]	7	158730995	158830253	q36.3	-1
ENSG00000163808	83.2295	-0.503896	0.139704	-3.60687	0.00030991	0.01521	down	KIF15	kinesin family member 15 [Source:HGNC Symbol;Acc:HGNC:17273]	3	44761721	44873376	p21.31	1
ENSG00000141560	774.764	-0.171005	0.0475267	-3.59809	0.000320558	0.01565	down	FN3KRP	fructosamine 3 kinase related protein [Source:HGNC Symbol;Acc:HGNC:25700]	17	82716706	82730328	q25.3	1
ENSG00000112394	789.638	-0.258265	0.0719132	-3.59134	0.000328983	0.01594	down	SLC16A10	solute carrier family 16 member 10 [Source:HGNC Symbol;Acc:HGNC:17027]	6	111087503	111231194	q21	1
ENSG00000261505	105.549	0.458914	0.127778	3.59149	0.000328788	0.01594	up		novel transcript, antisense to UBE2I	16	1317891	1322845	p13.3	-1
ENSG00000079616	259.753	-0.324619	0.0905191	-3.58619	0.000335542	0.01619	down	KIF22	kinesin family member 22 [Source:HGNC Symbol;Acc:HGNC:6391]	16	29790719	29805385	p11.2	1
ENSG00000054392	597.115	-0.197904	0.0552335	-3.58305	0.000339603	0.0163	down	HHAT	hedgehog acyltransferase [Source:HGNC Symbol;Acc:HGNC:18270]	1	210328252	210676296	q32.2	1
ENSG00000139624	1091.56	-0.15041	0.0419849	-3.58248	0.000340346	0.0163	down	CERS5	ceramide synthase 5 [Source:HGNC Symbol;Acc:HGNC:23749]	12	50129299	50167533	q13.12	-1
ENSG00000076003	1672.41	-0.161009	0.0449856	-3.57913	0.000344741	0.01638	down	MCM6	minichromosome maintenance complex component 6 [Source:HGNC Symbol;Acc:HGNC:6949]	2	135839626	135876443	q21.3	-1
ENSG00000130164	1808.85	0.185824	0.0519137	3.57949	0.000344269	0.01638	up	LDLR	low density lipoprotein receptor [Source:HGNC Symbol;Acc:HGNC:6547]	19	11089362	11133816	p13.2	1
ENSG00000188921	726.521	-0.172274	0.0481572	-3.57733	0.000347122	0.01643	down	HACD4	3-hydroxyacyl-CoA dehydratase 4 [Source:HGNC Symbol;Acc:HGNC:20920]	9	20999509	21031640	p21.3	-1
ENSG00000135218	6697.4	0.160905	0.0449979	3.57583	0.000349119	0.01647	up	CD36	CD36 molecule [Source:HGNC Symbol;Acc:HGNC:1663]	7	80369575	80679277	q21.11	1
ENSG00000112379	319.743	-0.390013	0.109114	-3.57436	0.000351084	0.01649	down	ARFGEF3	ARFGEF family member 3 [Source:HGNC Symbol;Acc:HGNC:21213]	6	138161939	138344663	q23.3	1
ENSG00000152990	96.9221	-0.423864	0.118613	-3.57351	0.000352223	0.01649	down	ADGRA3	adhesion G protein-coupled receptor A3 [Source:HGNC Symbol;Acc:HGNC:13839]	4	22345071	22516066	p15.2	-1
ENSG00000162298	1305.45	0.244711	0.068534	3.57065	0.000356097	0.01661	up	SYVN1	synoviolin 1 [Source:HGNC Symbol;Acc:HGNC:20738]	11	65121780	65134533	q13.1	-1
ENSG00000112294	1384.56	-0.139229	0.0390555	-3.56491	0.00036398	0.01687	down	ALDH5A1	aldehyde dehydrogenase 5 family member A1 [Source:HGNC Symbol;Acc:HGNC:408]	6	24494867	24537207	p22.3	1
ENSG00000135596	6875.78	-0.155417	0.0435998	-3.56462	0.000364386	0.01687	down	MICAL1	microtubule associated monooxygenase, calponin and LIM domain containing 1 [Source:HGNC Symbol;Acc:HGNC:20619]	6	109444062	109465968	q21	-1
ENSG00000134324	1807.88	0.13903	0.0390631	3.55911	0.000372114	0.01717	up	LPIN1	lipin 1 [Source:HGNC Symbol;Acc:HGNC:13345]	2	11677595	11827409	p25.1	1
ENSG00000117632	458.783	-0.348106	0.098226	-3.54394	0.000394202	0.01812	down	STMN1	stathmin 1 [Source:HGNC Symbol;Acc:HGNC:6510]	1	25884181	25906991	p36.11	-1
ENSG00000010292	1157.26	-0.169813	0.0479794	-3.53928	0.000401213	0.01831	down	NCAPD2	non-SMC condensin I complex subunit D2 [Source:HGNC Symbol;Acc:HGNC:24305]	12	6493356	6531955	p13.31	1
ENSG00000179218	32600.3	0.154647	0.0436847	3.54007	0.000400021	0.01831	up	CALR	calreticulin [Source:HGNC Symbol;Acc:HGNC:1455]	19	12938578	12944489	p13.13	1
ENSG00000136492	99.774	-0.425217	0.120408	-3.53146	0.000413266	0.01874	down	BRIP1	BRCA1 interacting protein C-terminal helicase 1 [Source:HGNC Symbol;Acc:HGNC:20473]	17	61681266	61863521	q23.2	-1
ENSG00000156970	138.857	-0.463619	0.131291	-3.53122	0.00041364	0.01874	down	BUB1B	BUB1 mitotic checkpoint serine/threonine kinase B [Source:HGNC Symbol;Acc:HGNC:1149]	15	40161023	40221136	q15.1	1
ENSG00000168411	984.825	-0.160721	0.0455409	-3.52916	0.000416877	0.01882	down	RFWD3	ring finger and WD repeat domain 3 [Source:HGNC Symbol;Acc:HGNC:25539]	16	74621399	74666877	q23.1	-1
ENSG00000142655	1251.26	-0.152061	0.0431131	-3.52703	0.000420246	0.0189	down	PEX14	peroxisomal biogenesis factor 14 [Source:HGNC Symbol;Acc:HGNC:8856]	1	10472288	10630758	p36.22	1
ENSG00000136689	32048.6	0.169182	0.0480222	3.523	0.000426684	0.01912	up	IL1RN	interleukin 1 receptor antagonist [Source:HGNC Symbol;Acc:HGNC:6000]	2	113107214	113134016	q14.1	1
ENSG00000103066	4433.68	0.146274	0.0415339	3.5218	0.000428624	0.01914	up	PLA2G15	phospholipase A2 group XV [Source:HGNC Symbol;Acc:HGNC:17163]	16	68245304	68261058	q22.1	1
ENSG00000115295	4590.99	-0.153934	0.0437358	-3.51964	0.000432132	0.01915	down	CLIP4	CAP-Gly domain containing linker protein family member 4 [Source:HGNC Symbol;Acc:HGNC:26108]	2	29097705	29189643	p23.2	1
ENSG00000134684	2753.2	0.121684	0.0345661	3.52033	0.000431012	0.01915	up	YARS	tyrosyl-tRNA synthetase [Source:HGNC Symbol;Acc:HGNC:12840]	1	32775237	32818153	p35.1	-1
ENSG00000178999	64.5303	-0.664581	0.188864	-3.51883	0.000433449	0.01915	down	AURKB	aurora kinase B [Source:HGNC Symbol;Acc:HGNC:11390]	17	8204733	8210600	p13.1	-1
ENSG00000134690	128.331	-0.364292	0.103573	-3.51725	0.00043604	0.0192	down	CDCA8	cell division cycle associated 8 [Source:HGNC Symbol;Acc:HGNC:14629]	1	37692481	37709719	p34.3	1
ENSG00000161544	1304.1	0.265683	0.075604	3.51414	0.000441177	0.01936	up	CYGB	cytoglobin [Source:HGNC Symbol;Acc:HGNC:16505]	17	76527356	76551175	q25.1	-1
ENSG00000135046	9381.53	0.127581	0.0363598	3.50885	0.000450055	0.01954	up	ANXA1	annexin A1 [Source:HGNC Symbol;Acc:HGNC:533]	9	73151865	73170393	q21.13	1
ENSG00000146670	207.51	-0.320848	0.0914265	-3.50935	0.000449198	0.01954	down	CDCA5	cell division cycle associated 5 [Source:HGNC Symbol;Acc:HGNC:14626]	11	65066300	65084164	q13.1	-1
ENSG00000254416	43.7927	-0.743981	0.211998	-3.50937	0.000449164	0.01954	down	LINC02732	long intergenic non-protein coding RNA 2732 [Source:HGNC Symbol;Acc:HGNC:54249]	11	110355130	110407613	q22.3	1
ENSG00000119397	870.74	-0.226988	0.0648249	-3.50155	0.000462559	0.02002	down	CNTRL	centriolin [Source:HGNC Symbol;Acc:HGNC:1858]	9	121074863	121177610	q33.2	1
ENSG00000152795	3005.73	0.181429	0.0518532	3.49889	0.000467205	0.02006	up	HNRNPDL	heterogeneous nuclear ribonucleoprotein D like [Source:HGNC Symbol;Acc:HGNC:5037]	4	82422564	82430408	q21.22	-1
ENSG00000162512	921.949	0.209948	0.0600141	3.49831	0.000468209	0.02006	up	SDC3	syndecan 3 [Source:HGNC Symbol;Acc:HGNC:10660]	1	30869466	30908758	p35.2	-1
ENSG00000166483	124.65	-0.372827	0.106577	-3.49819	0.000468426	0.02006	down	WEE1	WEE1 G2 checkpoint kinase [Source:HGNC Symbol;Acc:HGNC:12761]	11	9573670	9593457	p15.4	1
ENSG00000277449	46.6194	0.632866	0.180953	3.49741	0.000469807	0.02006	up	CEBPB-AS1	CEBPB antisense RNA 1 [Source:HGNC Symbol;Acc:HGNC:51226]	20	50184598	50191498	q13.13	-1
ENSG00000119969	114.421	-0.448512	0.128511	-3.49006	0.000482919	0.02051	down	HELLS	helicase, lymphoid specific [Source:HGNC Symbol;Acc:HGNC:4861]	10	94501434	94613905	q23.33	1
ENSG00000133055	208.173	0.379807	0.108839	3.48961	0.000483724	0.02051	up	MYBPH	myosin binding protein H [Source:HGNC Symbol;Acc:HGNC:7552]	1	203167811	203175826	q32.1	-1
ENSG00000087448	462.911	-0.201089	0.057672	-3.48677	0.000488898	0.02066	down	KLHL42	kelch like family member 42 [Source:HGNC Symbol;Acc:HGNC:29252]	12	27780048	27803040	p11.22	1
ENSG00000100889	5132.96	-0.127673	0.0367078	-3.47809	0.000504992	0.021	down	PCK2	phosphoenolpyruvate carboxykinase 2, mitochondrial [Source:HGNC Symbol;Acc:HGNC:8725]	14	24094053	24110598	q11.2	1
ENSG00000136040	12316.3	-0.178505	0.0513071	-3.47915	0.000503004	0.021	down	PLXNC1	plexin C1 [Source:HGNC Symbol;Acc:HGNC:9106]	12	94148577	94307675	q22	1
ENSG00000161638	6918.36	0.16338	0.0469758	3.47796	0.00050525	0.021	up	ITGA5	integrin subunit alpha 5 [Source:HGNC Symbol;Acc:HGNC:6141]	12	54395261	54419266	q13.13	-1
ENSG00000163959	231.395	0.385564	0.110811	3.47946	0.000502418	0.021	up	SLC51A	solute carrier family 51 alpha subunit [Source:HGNC Symbol;Acc:HGNC:29955]	3	196211487	196243178	q29	1
ENSG00000248323	129.882	0.470371	0.135131	3.48085	0.000499825	0.021	up	LUCAT1	lung cancer associated transcript 1 [Source:HGNC Symbol;Acc:HGNC:48498]	5	91054834	91314547	q14.3	-1
ENSG00000163902	6979.92	0.152269	0.0438051	3.47605	0.000508862	0.02108	up	RPN1	ribophorin I [Source:HGNC Symbol;Acc:HGNC:10381]	3	128619969	128681075	q21.3	-1
ENSG00000113013	13655.2	0.102349	0.0294557	3.47468	0.000511454	0.02112	up	HSPA9	heat shock protein family A (Hsp70) member 9 [Source:HGNC Symbol;Acc:HGNC:5244]	5	138553756	138575416	q31.2	-1
ENSG00000129675	1403.8	-0.173471	0.0499705	-3.47147	0.000517623	0.0213	down	ARHGEF6	Rac/Cdc42 guanine nucleotide exchange factor 6 [Source:HGNC Symbol;Acc:HGNC:685]	X	136665547	136780932	q26.3	-1
ENSG00000185070	918.397	-0.219729	0.0633718	-3.4673	0.00052572	0.02157	down	FLRT2	fibronectin leucine rich transmembrane protein 2 [Source:HGNC Symbol;Acc:HGNC:3761]	14	85530144	85654428	q31.3	1
ENSG00000128272	3398.46	0.241637	0.069755	3.46409	0.000532036	0.02175	up	ATF4	activating transcription factor 4 [Source:HGNC Symbol;Acc:HGNC:786]	22	39519695	39522685	q13.1	1
ENSG00000171658	217.332	0.324804	0.0938121	3.46229	0.000535607	0.02183	up	NMRAL2P	NmrA like redox sensor 2, pseudogene [Source:HGNC Symbol;Acc:HGNC:52332]	3	185959943	185980872	q27.2	1
ENSG00000158106	154.73	-0.421396	0.121932	-3.45601	0.000548242	0.02227	down	RHPN1	rhophilin Rho GTPase binding protein 1 [Source:HGNC Symbol;Acc:HGNC:19973]	8	143368876	143384221	q24.3	1
ENSG00000124181	609.062	-0.183704	0.053178	-3.45451	0.000551295	0.02232	down	PLCG1	phospholipase C gamma 1 [Source:HGNC Symbol;Acc:HGNC:9065]	20	41136960	41196801	q12	1
ENSG00000131238	46927.4	-0.120884	0.0350268	-3.4512	0.000558105	0.02253	down	PPT1	palmitoyl-protein thioesterase 1 [Source:HGNC Symbol;Acc:HGNC:9325]	1	40071461	40097727	p34.2	-1
ENSG00000073008	621.495	0.203945	0.0592126	3.44428	0.000572578	0.02284	up	PVR	PVR cell adhesion molecule [Source:HGNC Symbol;Acc:HGNC:9705]	19	44643798	44666162	q13.31	1
ENSG00000079999	1901.11	0.166032	0.0482065	3.44417	0.000572813	0.02284	up	KEAP1	kelch like ECH associated protein 1 [Source:HGNC Symbol;Acc:HGNC:23177]	19	10486125	10503558	p13.2	-1
ENSG00000114354	1601.24	0.143462	0.0416547	3.44407	0.000573029	0.02284	up	TFG	trafficking from ER to golgi regulator [Source:HGNC Symbol;Acc:HGNC:11758]	3	100709331	100748964	q12.2	1
ENSG00000168350	58.0674	0.597728	0.173436	3.44639	0.000568131	0.02284	up	DEGS2	delta 4-desaturase, sphingolipid 2 [Source:HGNC Symbol;Acc:HGNC:20113]	14	100143957	100159645	q32.2	-1
ENSG00000278535	1570.02	-0.174612	0.0507315	-3.44188	0.000577676	0.02295	down	DHRS11	dehydrogenase/reductase 11 [Source:HGNC Symbol;Acc:HGNC:28639]	17	36591879	36600804	q12	1
ENSG00000163661	550.976	-0.480593	0.139682	-3.44063	0.000580367	0.02298	down	PTX3	pentraxin 3 [Source:HGNC Symbol;Acc:HGNC:9692]	3	157436850	157443633	q25.32	1
ENSG00000048140	3972.38	-0.146238	0.0426263	-3.4307	0.000602031	0.02377	down	TSPAN17	tetraspanin 17 [Source:HGNC Symbol;Acc:HGNC:13594]	5	176647387	176659054	q35.2	1
ENSG00000088325	280.356	-0.288079	0.0842819	-3.41804	0.000630743	0.02482	down	TPX2	TPX2 microtubule nucleation factor [Source:HGNC Symbol;Acc:HGNC:1249]	20	31739271	31801805	q11.21	1
ENSG00000137936	621.013	0.199029	0.05834	3.41153	0.000645985	0.02534	up	BCAR3	BCAR3 adaptor protein, NSP family member [Source:HGNC Symbol;Acc:HGNC:973]	1	93561741	93847150	p22.1	-1
ENSG00000143554	4368.33	-0.246363	0.0722443	-3.41013	0.000649313	0.0254	down	SLC27A3	solute carrier family 27 member 3 [Source:HGNC Symbol;Acc:HGNC:10997]	1	153774354	153780157	q21.3	1
ENSG00000100162	86.1013	-0.539162	0.158289	-3.40619	0.000658759	0.02569	down	CENPM	centromere protein M [Source:HGNC Symbol;Acc:HGNC:18352]	22	41938737	41947152	q13.2	-1
ENSG00000181754	125.215	-0.347848	0.102212	-3.40321	0.00066598	0.02589	down	AMIGO1	adhesion molecule with Ig like domain 1 [Source:HGNC Symbol;Acc:HGNC:20824]	1	109504178	109509738	p13.3	-1
ENSG00000077238	3930.07	-0.0950354	0.0279564	-3.39941	0.000675307	0.02609	down	IL4R	interleukin 4 receptor [Source:HGNC Symbol;Acc:HGNC:6015]	16	27313668	27364778	p12.1	1
ENSG00000172086	455.68	0.214344	0.0630426	3.39999	0.000673892	0.02609	up	KRCC1	lysine rich coiled-coil 1 [Source:HGNC Symbol;Acc:HGNC:28039]	2	88027205	88064252	p11.2	-1
ENSG00000164733	220681	-0.0931946	0.0274322	-3.39727	0.000680626	0.02621	down	CTSB	cathepsin B [Source:HGNC Symbol;Acc:HGNC:2527]	8	11842524	11869448	p23.1	-1
ENSG00000163918	225.148	-0.334496	0.0985005	-3.39588	0.000684074	0.02627	down	RFC4	replication factor C subunit 4 [Source:HGNC Symbol;Acc:HGNC:9972]	3	186789880	186807058	q27.3	-1
ENSG00000123453	632.925	-0.22389	0.0659794	-3.39333	0.000690491	0.02643	down	SARDH	sarcosine dehydrogenase [Source:HGNC Symbol;Acc:HGNC:10536]	9	133663560	133739955	q34.2	-1
ENSG00000010704	444.053	0.213401	0.0629772	3.38855	0.000702631	0.02664	up	HFE	homeostatic iron regulator [Source:HGNC Symbol;Acc:HGNC:4886]	6	26087281	26098343	p22.2	1
ENSG00000133943	2468.19	-0.112653	0.0332621	-3.38681	0.000707108	0.02664	down	DGLUCY	D-glutamate cyclase [Source:HGNC Symbol;Acc:HGNC:20498]	14	91060333	91225632	q32.11	1
ENSG00000135912	2069.55	-0.133617	0.0394232	-3.38931	0.000700692	0.02664	down	TTLL4	tubulin tyrosine ligase like 4 [Source:HGNC Symbol;Acc:HGNC:28976]	2	218710835	218755416	q35	1
ENSG00000138166	2214.23	0.192837	0.0569157	3.38812	0.000703733	0.02664	up	DUSP5	dual specificity phosphatase 5 [Source:HGNC Symbol;Acc:HGNC:3071]	10	110497907	110511533	q25.2	1
ENSG00000138449	90.0536	-0.443633	0.131011	-3.38623	0.0007086	0.02664	down	SLC40A1	solute carrier family 40 member 1 [Source:HGNC Symbol;Acc:HGNC:10909]	2	189560579	189583758	q32.2	-1
ENSG00000168209	44.3172	0.91007	0.268725	3.38663	0.000707572	0.02664	up	DDIT4	DNA damage inducible transcript 4 [Source:HGNC Symbol;Acc:HGNC:24944]	10	72273924	72276036	q22.1	1
ENSG00000104951	1041.41	0.357077	0.10554	3.38333	0.000716117	0.02684	up	IL4I1	interleukin 4 induced 1 [Source:HGNC Symbol;Acc:HGNC:19094]	19	49889654	49929539	q13.33	-1
ENSG00000101040	1358.42	-0.161431	0.0477598	-3.38007	0.000724687	0.02708	down	ZMYND8	zinc finger MYND-type containing 8 [Source:HGNC Symbol;Acc:HGNC:9397]	20	47209214	47356889	q13.12	-1
ENSG00000075624	181397	-0.221534	0.0658545	-3.364	0.000768213	0.02846	down	ACTB	actin beta [Source:HGNC Symbol;Acc:HGNC:132]	7	5527148	5563784	p22.1	-1
ENSG00000128045	248.995	-0.248624	0.0738753	-3.36545	0.000764189	0.02846	down	RASL11B	RAS like family 11 member B [Source:HGNC Symbol;Acc:HGNC:23804]	4	52862317	52866835	q12	1
ENSG00000163399	19537.3	-0.151737	0.0450959	-3.36475	0.000766132	0.02846	down	ATP1A1	ATPase Na+/K+ transporting subunit alpha 1 [Source:HGNC Symbol;Acc:HGNC:799]	1	116372668	116410261	p13.1	1
ENSG00000090889	104.424	-0.488142	0.145423	-3.35669	0.000788807	0.02912	down	KIF4A	kinesin family member 4A [Source:HGNC Symbol;Acc:HGNC:13339]	X	70290104	70420886	q13.1	1
ENSG00000132780	1179.25	-0.198408	0.0591339	-3.35524	0.000792966	0.02912	down	NASP	nuclear autoantigenic sperm protein [Source:HGNC Symbol;Acc:HGNC:7644]	1	45583846	45618904	p34.1	1
ENSG00000203710	1805.11	-0.167884	0.0500302	-3.35564	0.000791807	0.02912	down	CR1	complement C3b/C4b receptor 1 (Knops blood group) [Source:HGNC Symbol;Acc:HGNC:2334]	1	207496147	207641765	q32.2	1
ENSG00000008130	4207.93	-0.13643	0.0407289	-3.34969	0.000809008	0.02953	down	NADK	NAD kinase [Source:HGNC Symbol;Acc:HGNC:29831]	1	1751232	1780457	p36.33	-1
ENSG00000232258	531.998	-0.322961	0.0964113	-3.34982	0.000808641	0.02953	down	TMEM114	transmembrane protein 114 [Source:HGNC Symbol;Acc:HGNC:33227]	16	8537605	8590193	p13.2	-1
ENSG00000186594	719.674	0.275095	0.082296	3.34274	0.000829543	0.03019	up	MIR22HG	MIR22 host gene [Source:HGNC Symbol;Acc:HGNC:28219]	17	1711493	1717174	p13.3	-1
ENSG00000106462	334.693	-0.237098	0.0709821	-3.34025	0.000837016	0.03038	down	EZH2	enhancer of zeste 2 polycomb repressive complex 2 subunit [Source:HGNC Symbol;Acc:HGNC:3527]	7	148807383	148884321	q36.1	-1
ENSG00000072571	171.009	-0.346086	0.103725	-3.33658	0.000848172	0.0307	down	HMMR	hyaluronan mediated motility receptor [Source:HGNC Symbol;Acc:HGNC:5012]	5	163460203	163491941	q34	1
ENSG00000115687	221.837	-0.286318	0.0859125	-3.33267	0.000860178	0.03104	down	PASK	PAS domain containing serine/threonine kinase [Source:HGNC Symbol;Acc:HGNC:17270]	2	241106099	241150264	q37.3	-1
ENSG00000133026	97.6701	-0.4101	0.123118	-3.33094	0.000865536	0.03114	down	MYH10	myosin heavy chain 10 [Source:HGNC Symbol;Acc:HGNC:7568]	17	8474205	8630761	p13.1	-1
ENSG00000163235	427.294	0.281595	0.0849274	3.31571	0.000914111	0.0328	up	TGFA	transforming growth factor alpha [Source:HGNC Symbol;Acc:HGNC:11765]	2	70447284	70554193	p13.3	-1
ENSG00000155229	2369.86	-0.11027	0.03327	-3.31438	0.000918458	0.03281	down	MMS19	MMS19 homolog, cytosolic iron-sulfur assembly component [Source:HGNC Symbol;Acc:HGNC:13824]	10	97458324	97498794	q24.1	-1
ENSG00000166575	505.167	0.20668	0.0623657	3.314	0.000919712	0.03281	up	TMEM135	transmembrane protein 135 [Source:HGNC Symbol;Acc:HGNC:26167]	11	87037844	87328824	q14.2	1
ENSG00000077549	7683.27	-0.0843782	0.0254824	-3.31124	0.000928841	0.03295	down	CAPZB	capping actin protein of muscle Z-line subunit beta [Source:HGNC Symbol;Acc:HGNC:1491]	1	19338775	19485539	p36.13	-1
ENSG00000142798	1944.47	-0.306475	0.092541	-3.31177	0.000927065	0.03295	down	HSPG2	heparan sulfate proteoglycan 2 [Source:HGNC Symbol;Acc:HGNC:5273]	1	21822244	21937310	p36.12	-1
ENSG00000140403	791.726	0.165111	0.0498873	3.30968	0.000934027	0.03304	up	DNAJA4	DnaJ heat shock protein family (Hsp40) member A4 [Source:HGNC Symbol;Acc:HGNC:14885]	15	78264086	78282196	q25.1	1
ENSG00000198380	1135.84	0.199605	0.0604212	3.30356	0.000954639	0.03368	up	GFPT1	glutamine--fructose-6-phosphate transaminase 1 [Source:HGNC Symbol;Acc:HGNC:4241]	2	69319769	69387254	p13.3	-1
ENSG00000113552	2445.31	-0.13848	0.0419521	-3.3009	0.000963758	0.03383	down	GNPDA1	glucosamine-6-phosphate deaminase 1 [Source:HGNC Symbol;Acc:HGNC:4417]	5	141991749	142013041	q31.3	-1
ENSG00000173868	159.467	-0.42046	0.127384	-3.30073	0.000964328	0.03383	down	PHOSPHO1	phosphoethanolamine/phosphocholine phosphatase [Source:HGNC Symbol;Acc:HGNC:16815]	17	49223362	49230766	q21.32	-1
ENSG00000260032	5659.94	0.101299	0.0307248	3.29698	0.000977308	0.03419	up	NORAD	non-coding RNA activated by DNA damage [Source:HGNC Symbol;Acc:HGNC:44311]	20	36045618	36051018	q11.23	-1
ENSG00000072121	7984.28	-0.14437	0.0438095	-3.2954	0.000982805	0.03429	down	ZFYVE26	zinc finger FYVE-type containing 26 [Source:HGNC Symbol;Acc:HGNC:20761]	14	67727374	67816590	q24.1	-1
ENSG00000174371	124.581	-0.409498	0.124335	-3.29352	0.000989427	0.03442	down	EXO1	exonuclease 1 [Source:HGNC Symbol;Acc:HGNC:3511]	1	241847967	241895148	q43	1
ENSG00000136960	177.709	0.322867	0.0981069	3.29097	0.000998434	0.03464	up	ENPP2	ectonucleotide pyrophosphatase/phosphodiesterase 2 [Source:HGNC Symbol;Acc:HGNC:3357]	8	119557086	119673453	q24.12	-1
ENSG00000117724	343.014	-0.377215	0.114671	-3.28955	0.00100349	0.03472	down	CENPF	centromere protein F [Source:HGNC Symbol;Acc:HGNC:1857]	1	214603195	214664571	q41	1
ENSG00000089060	4262.22	-0.115604	0.0351667	-3.28733	0.00101144	0.0349	down	SLC8B1	solute carrier family 8 member B1 [Source:HGNC Symbol;Acc:HGNC:26175]	12	113298759	113359493	q24.13	-1
ENSG00000151503	751.888	-0.161272	0.0490864	-3.28548	0.00101809	0.03494	down	NCAPD3	non-SMC condensin II complex subunit D3 [Source:HGNC Symbol;Acc:HGNC:28952]	11	134150119	134225454	q25	-1
ENSG00000183688	831.915	-0.16368	0.0498114	-3.28599	0.00101624	0.03494	down	RFLNB	refilin B [Source:HGNC Symbol;Acc:HGNC:28705]	17	439978	445939	p13.3	-1
ENSG00000076770	579.291	-0.283768	0.0865064	-3.28031	0.00103694	0.03533	down	MBNL3	muscleblind like splicing regulator 3 [Source:HGNC Symbol;Acc:HGNC:20564]	X	132369317	132489968	q26.2	-1
ENSG00000088826	220.039	0.373073	0.113741	3.28001	0.00103803	0.03533	up	SMOX	spermine oxidase [Source:HGNC Symbol;Acc:HGNC:15862]	20	4120980	4187747	p13	1
ENSG00000144354	45.747	-0.656897	0.200187	-3.28141	0.00103288	0.03533	down	CDCA7	cell division cycle associated 7 [Source:HGNC Symbol;Acc:HGNC:14628]	2	173354820	173368997	q31.1	1
ENSG00000168904	5723.4	-0.155643	0.0474693	-3.27883	0.00104239	0.03539	down	LRRC28	leucine rich repeat containing 28 [Source:HGNC Symbol;Acc:HGNC:28355]	15	99251362	99390729	q26.3	1
ENSG00000176890	150.556	-0.409637	0.124995	-3.27721	0.00104838	0.03549	down	TYMS	thymidylate synthetase [Source:HGNC Symbol;Acc:HGNC:12441]	18	657653	673578	p11.32	1
ENSG00000140961	957.242	0.267358	0.081627	3.27536	0.00105528	0.03557	up	OSGIN1	oxidative stress induced growth inhibitor 1 [Source:HGNC Symbol;Acc:HGNC:30093]	16	83931311	83966332	q23.3	1
ENSG00000170915	1408.76	-0.171945	0.0525006	-3.27511	0.00105621	0.03557	down	PAQR8	progestin and adipoQ receptor family member 8 [Source:HGNC Symbol;Acc:HGNC:15708]	6	52361421	52407777	p12.2	1
ENSG00000123505	5732.26	-0.138707	0.0423723	-3.27352	0.00106215	0.03558	down	AMD1	adenosylmethionine decarboxylase 1 [Source:HGNC Symbol;Acc:HGNC:457]	6	110874770	110898879	q21	1
ENSG00000124357	4923.71	-0.188605	0.0576128	-3.27367	0.0010616	0.03558	down	NAGK	N-acetylglucosamine kinase [Source:HGNC Symbol;Acc:HGNC:17174]	2	71064344	71079808	p13.3	1
ENSG00000167670	569.308	-0.185922	0.0569005	-3.26749	0.00108506	0.03625	down	CHAF1A	chromatin assembly factor 1 subunit A [Source:HGNC Symbol;Acc:HGNC:1910]	19	4402640	4445018	p13.3	1
ENSG00000117593	1412.64	-0.149246	0.0457251	-3.264	0.00109852	0.0366	down	DARS2	aspartyl-tRNA synthetase 2, mitochondrial [Source:HGNC Symbol;Acc:HGNC:25538]	1	173824653	173858808	q25.1	1
ENSG00000126067	2797	0.124643	0.0382498	3.25866	0.00111938	0.03706	up	PSMB2	proteasome subunit beta 2 [Source:HGNC Symbol;Acc:HGNC:9539]	1	35599541	35641526	p34.3	-1
ENSG00000167004	7166.32	0.181169	0.0556042	3.25819	0.00112124	0.03706	up	PDIA3	protein disulfide isomerase family A member 3 [Source:HGNC Symbol;Acc:HGNC:4606]	15	43746410	43773278	q15.3	1
ENSG00000262488	56.9518	-0.519696	0.15947	-3.25889	0.00111848	0.03706	down		Rho GTPase activating protein 21 (ARHGAP21) pseudogene	16	10840384	10841544	p13.13	-1
ENSG00000123179	53.1537	-0.603983	0.18561	-3.25405	0.00113773	0.03751	down	EBPL	EBP like [Source:HGNC Symbol;Acc:HGNC:18061]	13	49660674	49691486	q14.2	-1
ENSG00000170871	2683.25	0.140295	0.0431244	3.25328	0.00114083	0.03751	up	KIAA0232	KIAA0232 [Source:HGNC Symbol;Acc:HGNC:28992]	4	6781375	6884170	p16.1	1
ENSG00000139613	1815.58	-0.172162	0.0529371	-3.2522	0.00114514	0.03753	down	SMARCC2	SWI/SNF related, matrix associated, actin dependent regulator of chromatin subfamily c member 2 [Source:HGNC Symbol;Acc:HGNC:11105]	12	56162359	56189567	q13.2	-1
ENSG00000146776	264.62	-0.262944	0.0808648	-3.25165	0.00114737	0.03753	down	ATXN7L1	ataxin 7 like 1 [Source:HGNC Symbol;Acc:HGNC:22210]	7	105605067	105876604	q22.3	-1
ENSG00000085999	61.5778	-0.493887	0.152033	-3.24855	0.00115993	0.03761	down	RAD54L	RAD54 like [Source:HGNC Symbol;Acc:HGNC:9826]	1	46246461	46278480	p34.1	1
ENSG00000129354	80.2979	-0.479675	0.147609	-3.24964	0.00115552	0.03761	down	AP1M2	adaptor related protein complex 1 subunit mu 2 [Source:HGNC Symbol;Acc:HGNC:558]	19	10572671	10587315	p13.2	-1
ENSG00000136052	1231.16	0.19276	0.0593376	3.24853	0.00116004	0.03761	up	SLC41A2	solute carrier family 41 member 2 [Source:HGNC Symbol;Acc:HGNC:31045]	12	104802553	104958744	q23.3	-1
ENSG00000136235	119749	-0.103278	0.031796	-3.24813	0.00116165	0.03761	down	GPNMB	glycoprotein nmb [Source:HGNC Symbol;Acc:HGNC:4462]	7	23235967	23275108	p15.3	1
ENSG00000022267	839.753	-0.159189	0.0490563	-3.24503	0.00117437	0.03789	down	FHL1	four and a half LIM domains 1 [Source:HGNC Symbol;Acc:HGNC:3702]	X	136146702	136211359	q26.3	1
ENSG00000100629	89.0203	-0.415355	0.128073	-3.24311	0.00118231	0.03789	down	CEP128	centrosomal protein 128 [Source:HGNC Symbol;Acc:HGNC:20359]	14	80476983	80959517	q31.1	-1
ENSG00000102054	2105.35	-0.11407	0.0351613	-3.24421	0.00117779	0.03789	down	RBBP7	RB binding protein 7, chromatin remodeling factor [Source:HGNC Symbol;Acc:HGNC:9890]	X	16839283	16870414	p22.2	-1
ENSG00000111640	25087.3	0.121415	0.0374366	3.24321	0.00118192	0.03789	up	GAPDH	glyceraldehyde-3-phosphate dehydrogenase [Source:HGNC Symbol;Acc:HGNC:4141]	12	6534512	6538374	p13.31	1
ENSG00000204520	294.39	0.249053	0.0768153	3.24223	0.00118599	0.03791	up	MICA	MHC class I polypeptide-related sequence A [Source:HGNC Symbol;Acc:HGNC:7090]	6	31399784	31415315	p21.33	1
ENSG00000174151	961.752	-0.150267	0.0464038	-3.23826	0.00120263	0.03834	down	CYB561D1	cytochrome b561 family member D1 [Source:HGNC Symbol;Acc:HGNC:26804]	1	109494052	109502932	p13.3	1
ENSG00000103496	3114.49	-0.157733	0.0487289	-3.23695	0.00120816	0.03842	down	STX4	syntaxin 4 [Source:HGNC Symbol;Acc:HGNC:11439]	16	31032889	31042975	p11.2	1
ENSG00000123374	155.545	-0.33047	0.102114	-3.23627	0.00121103	0.03842	down	CDK2	cyclin dependent kinase 2 [Source:HGNC Symbol;Acc:HGNC:1771]	12	55966781	55972789	q13.2	1
ENSG00000174032	1114.96	0.146349	0.0453016	3.23054	0.00123556	0.0391	up	SLC25A30	solute carrier family 25 member 30 [Source:HGNC Symbol;Acc:HGNC:27371]	13	45393316	45418455	q14.13	-1
ENSG00000051620	261.085	0.346746	0.107368	3.2295	0.00124008	0.03914	up	HEBP2	heme binding protein 2 [Source:HGNC Symbol;Acc:HGNC:15716]	6	138403531	138422197	q24.1	1
ENSG00000135048	1315.44	0.184727	0.0572404	3.22721	0.00125005	0.03926	up	CEMIP2	cell migration inducing hyaluronidase 2 [Source:HGNC Symbol;Acc:HGNC:11869]	9	71683366	71816690	q21.13	-1
ENSG00000154065	110.318	0.406648	0.125986	3.22772	0.00124782	0.03926	up	ANKRD29	ankyrin repeat domain 29 [Source:HGNC Symbol;Acc:HGNC:27110]	18	23598926	23662911	q11.2	-1
ENSG00000180921	597.796	0.365773	0.113368	3.22642	0.00125351	0.03927	up	FAM83H	family with sequence similarity 83 member H [Source:HGNC Symbol;Acc:HGNC:24797]	8	143723933	143738234	q24.3	-1
ENSG00000206530	83.0553	0.422191	0.130958	3.22386	0.00126477	0.03952	up	CFAP44	cilia and flagella associated protein 44 [Source:HGNC Symbol;Acc:HGNC:25631]	3	113286930	113441610	q13.2	-1
ENSG00000116793	478.709	0.218647	0.0678577	3.22214	0.00127235	0.03966	up	PHTF1	putative homeodomain transcription factor 1 [Source:HGNC Symbol;Acc:HGNC:8939]	1	113696831	113759489	p13.2	-1
ENSG00000186205	588.276	-0.192015	0.0596074	-3.22134	0.00127594	0.03968	down	MARC1	mitochondrial amidoxime reducing component 1 [Source:HGNC Symbol;Acc:HGNC:26189]	1	220786913	220819659	q41	1
ENSG00000012124	1713.58	-0.130934	0.0406769	-3.21888	0.00128692	0.03992	down	CD22	CD22 molecule [Source:HGNC Symbol;Acc:HGNC:1643]	19	35319261	35347361	q13.12	1
ENSG00000115902	7485.42	0.165967	0.0515788	3.21774	0.00129205	0.03998	up	SLC1A4	solute carrier family 1 member 4 [Source:HGNC Symbol;Acc:HGNC:10942]	2	64988477	65023865	p14	1
ENSG00000111344	34.5108	0.809774	0.251889	3.21481	0.00130531	0.0401	up	RASAL1	RAS protein activator like 1 [Source:HGNC Symbol;Acc:HGNC:9873]	12	113098819	113136239	q24.13	-1
ENSG00000135404	51433.2	-0.124865	0.0388361	-3.21519	0.00130359	0.0401	down	CD63	CD63 molecule [Source:HGNC Symbol;Acc:HGNC:1692]	12	55725323	55729707	q13.2	-1
ENSG00000142765	539.786	-0.332965	0.103573	-3.21478	0.00130543	0.0401	down	SYTL1	synaptotagmin like 1 [Source:HGNC Symbol;Acc:HGNC:15584]	1	27342020	27353937	p36.11	1
ENSG00000102317	4174.56	0.110362	0.0343491	3.21296	0.00131372	0.04026	up	RBM3	RNA binding motif protein 3 [Source:HGNC Symbol;Acc:HGNC:9900]	X	48574449	48581162	p11.23	1
ENSG00000149636	564.876	-0.197849	0.0616202	-3.21078	0.00132377	0.04037	down	DSN1	DSN1 component of MIS12 kinetochore complex [Source:HGNC Symbol;Acc:HGNC:16165]	20	36751791	36773818	q11.23	-1
ENSG00000152128	194.085	0.458526	0.14279	3.21119	0.00132189	0.04037	up	TMEM163	transmembrane protein 163 [Source:HGNC Symbol;Acc:HGNC:25380]	2	134455759	134719000	q21.3	-1
ENSG00000072803	3746.55	-0.150255	0.0468075	-3.21006	0.00132706	0.04037	down	FBXW11	F-box and WD repeat domain containing 11 [Source:HGNC Symbol;Acc:HGNC:13607]	5	171861549	172006873	q35.1	-1
ENSG00000138658	133.992	-0.330907	0.10317	-3.20739	0.00133944	0.04065	down	ZGRF1	zinc finger GRF-type containing 1 [Source:HGNC Symbol;Acc:HGNC:25654]	4	112539333	112636995	q25	-1
ENSG00000164402	446.369	-0.193122	0.060435	-3.19553	0.00139574	0.04225	down	SEPTIN8	septin 8 [Source:HGNC Symbol;Acc:HGNC:16511]	5	132750819	132807241	q31.1	-1
ENSG00000149218	375.163	0.227788	0.0713108	3.1943	0.00140171	0.04233	up	ENDOD1	endonuclease domain containing 1 [Source:HGNC Symbol;Acc:HGNC:29129]	11	95089846	95132645	q21	1
ENSG00000157456	192.609	-0.268264	0.0840188	-3.1929	0.00140851	0.04244	down	CCNB2	cyclin B2 [Source:HGNC Symbol;Acc:HGNC:1580]	15	59105126	59125045	q22.2	1
ENSG00000158825	643.11	-0.186487	0.0584757	-3.18914	0.00142695	0.04282	down	CDA	cytidine deaminase [Source:HGNC Symbol;Acc:HGNC:1712]	1	20589086	20618903	p36.12	1
ENSG00000163346	2591.93	-0.141658	0.044422	-3.18893	0.00142802	0.04282	down	PBXIP1	PBX homeobox interacting protein 1 [Source:HGNC Symbol;Acc:HGNC:21199]	1	154944076	154956123	q21.3	-1
ENSG00000123427	840.124	-0.200928	0.0630618	-3.18621	0.00144151	0.04312	down	EEF1AKMT3	EEF1A lysine methyltransferase 3 [Source:HGNC Symbol;Acc:HGNC:24936]	12	57771492	57782541	q14.1	1
ENSG00000145604	191.626	-0.288295	0.0905468	-3.18393	0.00145291	0.04336	down	SKP2	S-phase kinase associated protein 2 [Source:HGNC Symbol;Acc:HGNC:10901]	5	36151989	36184319	p13.2	1
ENSG00000184164	424.496	0.373628	0.117408	3.18231	0.00146106	0.0435	up	CRELD2	cysteine rich with EGF like domains 2 [Source:HGNC Symbol;Acc:HGNC:28150]	22	49918167	49927540	q13.33	1
ENSG00000157379	569.17	-0.17311	0.0544965	-3.17654	0.00149045	0.04417	down	DHRS1	dehydrogenase/reductase 1 [Source:HGNC Symbol;Acc:HGNC:16445]	14	24290598	24299780	q12	-1
ENSG00000164032	1631.86	-0.232834	0.0732929	-3.17676	0.0014893	0.04417	down	H2AFZ	H2A histone family member Z [Source:HGNC Symbol;Acc:HGNC:4741]	4	99948086	99950355	q23	-1
ENSG00000072042	2083.36	0.138545	0.043644	3.17444	0.00150127	0.04418	up	RDH11	retinol dehydrogenase 11 [Source:HGNC Symbol;Acc:HGNC:17964]	14	67676800	67695793	q24.1	-1
ENSG00000134824	3189.02	0.185634	0.0584763	3.17452	0.00150082	0.04418	up	FADS2	fatty acid desaturase 2 [Source:HGNC Symbol;Acc:HGNC:3575]	11	61792980	61867354	q12.2	1
ENSG00000172893	371.925	0.264525	0.0833275	3.17452	0.00150086	0.04418	up	DHCR7	7-dehydrocholesterol reductase [Source:HGNC Symbol;Acc:HGNC:2860]	11	71428193	71452868	q13.4	-1
ENSG00000188643	337.7	0.220671	0.0695894	3.17104	0.00151894	0.04459	up	S100A16	S100 calcium binding protein A16 [Source:HGNC Symbol;Acc:HGNC:20441]	1	153606886	153613145	q21.3	-1
ENSG00000090674	2442.62	0.142778	0.0450737	3.16765	0.00153674	0.04501	up	MCOLN1	mucolipin 1 [Source:HGNC Symbol;Acc:HGNC:13356]	19	7522624	7534009	p13.2	1
ENSG00000073331	2719.71	-0.130418	0.0412456	-3.16198	0.00156701	0.04579	down	ALPK1	alpha kinase 1 [Source:HGNC Symbol;Acc:HGNC:20917]	4	112285509	112442621	q25	1
ENSG00000169679	283.412	-0.263688	0.0835242	-3.15703	0.00159384	0.04646	down	BUB1	BUB1 mitotic checkpoint serine/threonine kinase [Source:HGNC Symbol;Acc:HGNC:1148]	2	110637528	110678063	q13	-1
ENSG00000129244	265.284	0.93771	0.297561	3.15132	0.00162535	0.0472	up	ATP1B2	ATPase Na+/K+ transporting subunit beta 2 [Source:HGNC Symbol;Acc:HGNC:805]	17	7646627	7657770	p13.1	1
ENSG00000129534	893.731	-0.175672	0.0557498	-3.15108	0.00162666	0.0472	down	MIS18BP1	MIS18 binding protein 1 [Source:HGNC Symbol;Acc:HGNC:20190]	14	45203190	45253540	q21.2	-1
ENSG00000158517	1174.14	0.316168	0.10036	3.15034	0.00163078	0.04721	up	NCF1	neutrophil cytosolic factor 1 [Source:HGNC Symbol;Acc:HGNC:7660]	7	74773962	74789376	q11.23	1
ENSG00000071246	3481.52	-0.12922	0.0410559	-3.14742	0.00164717	0.04747	down	VASH1	vasohibin 1 [Source:HGNC Symbol;Acc:HGNC:19964]	14	76761468	76783015	q24.3	1
ENSG00000187676	525.3	-0.168867	0.0536483	-3.14768	0.00164574	0.04747	down	B3GLCT	beta 3-glucosyltransferase [Source:HGNC Symbol;Acc:HGNC:20207]	13	31199975	31332276	q12.3	1
ENSG00000158887	118.471	-0.343618	0.10923	-3.14583	0.00165617	0.04762	down	MPZ	myelin protein zero [Source:HGNC Symbol;Acc:HGNC:7225]	1	161304735	161309972	q23.3	-1
ENSG00000155827	1574.82	-0.167238	0.0532372	-3.14138	0.00168152	0.04824	down	RNF20	ring finger protein 20 [Source:HGNC Symbol;Acc:HGNC:10062]	9	101533853	101563344	q31.1	1
ENSG00000130340	2821.5	0.106267	0.0338419	3.14012	0.00168879	0.04834	up	SNX9	sorting nexin 9 [Source:HGNC Symbol;Acc:HGNC:14973]	6	157700387	157945077	q25.3	1
ENSG00000143033	672.386	-0.16479	0.0524901	-3.13945	0.00169264	0.04834	down	MTF2	metal response element binding transcription factor 2 [Source:HGNC Symbol;Acc:HGNC:29535]	1	93079235	93139079	p22.1	1
ENSG00000163468	4132.67	0.107511	0.0342872	3.1356	0.00171501	0.04878	up	CCT3	chaperonin containing TCP1 subunit 3 [Source:HGNC Symbol;Acc:HGNC:1616]	1	156308968	156367873	q22	-1
ENSG00000164649	354.063	-0.223471	0.0712725	-3.13545	0.00171591	0.04878	down	CDCA7L	cell division cycle associated 7 like [Source:HGNC Symbol;Acc:HGNC:30777]	7	21900899	21945903	p15.3	-1
ENSG00000080839	482.501	-0.216497	0.0691036	-3.13294	0.00173066	0.04909	down	RBL1	RB transcriptional corepressor like 1 [Source:HGNC Symbol;Acc:HGNC:9893]	20	36996349	37095997	q11.23	-1
ENSG00000131153	114.196	-0.435163	0.138973	-3.13127	0.0017405	0.04918	down	GINS2	GINS complex subunit 2 [Source:HGNC Symbol;Acc:HGNC:24575]	16	85676198	85690073	q24.1	-1
ENSG00000182957	2464.37	-0.124946	0.0399056	-3.13105	0.00174181	0.04918	down	SPATA13	spermatogenesis associated 13 [Source:HGNC Symbol;Acc:HGNC:23222]	13	23979805	24307074	q12.12	1
ENSG00000228716	209.086	-0.273542	0.0873987	-3.12982	0.00174915	0.04928	down	DHFR	dihydrofolate reductase [Source:HGNC Symbol;Acc:HGNC:2861]	5	80626226	80654983	q14.1	-1
ENSG00000067836	684.709	-0.237694	0.0760058	-3.12731	0.00176416	0.04959	down	ROGDI	rogdi atypical leucine zipper [Source:HGNC Symbol;Acc:HGNC:29478]	16	4796968	4802950	p13.3	-1
