# Supplementary material for: The antibiotic bedaquiline activates host macrophage innate immune resistance to bacterial infection
Source: eLife. 2020 May 4;9:e55692. doi: 10.7554/eLife.55692 (PMC7200153; doi:10.7554/eLife.55692)
Supplement: Figure 5—source data 4. — FDR < 0.05. [file elife-55692-fig5-data4.xlsx]

## Sheet: Feuil1
ensembl_gene_id	baseMean	log2FoldChange	lfcSE	stat	pvalue	padj	direction	hgnc_symbol	description	chromosome_name	start_position	end_position	band	strand
ENSG00000110324	3235.93	0.311382	0.0477334	6.52335	6.87524e-11	5.156e-07	up	IL10RA	interleukin 10 receptor subunit alpha [Source:HGNC Symbol;Acc:HGNC:5964]	11	117986348	118003037	q23.3	1
ENSG00000167703	1900.76	0.462132	0.0713926	6.47311	9.60056e-11	5.156e-07	up	SLC43A2	solute carrier family 43 member 2 [Source:HGNC Symbol;Acc:HGNC:23087]	17	1569267	1628886	p13.3	-1
ENSG00000196839	231.368	0.655079	0.107782	6.07781	1.21838e-09	4.362e-06	up	ADA	adenosine deaminase [Source:HGNC Symbol;Acc:HGNC:186]	20	44619522	44652233	q13.12	-1
ENSG00000169403	4333.36	0.303105	0.0504123	6.01253	1.82655e-09	4.905e-06	up	PTAFR	platelet activating factor receptor [Source:HGNC Symbol;Acc:HGNC:9582]	1	28147166	28193936	p35.3	-1
ENSG00000119986	1204.62	0.336917	0.0568055	5.93106	3.00987e-09	6.466e-06	up	AVPI1	arginine vasopressin induced 1 [Source:HGNC Symbol;Acc:HGNC:30898]	10	97677424	97687241	q24.2	-1
ENSG00000102096	213.847	0.560179	0.0957005	5.85346	4.81441e-09	8.619e-06	up	PIM2	Pim-2 proto-oncogene, serine/threonine kinase [Source:HGNC Symbol;Acc:HGNC:8987]	X	48913182	48919024	p11.23	-1
ENSG00000146278	935.549	0.444264	0.0784505	5.66298	1.48769e-08	2.283e-05	up	PNRC1	proline rich nuclear receptor coactivator 1 [Source:HGNC Symbol;Acc:HGNC:17278]	6	89080751	89085160	q15	1
ENSG00000111275	2666.99	0.250127	0.0448134	5.58152	2.38426e-08	3.201e-05	up	ALDH2	aldehyde dehydrogenase 2 family member [Source:HGNC Symbol;Acc:HGNC:404]	12	111766887	111817532	q24.12	1
ENSG00000128311	452.38	0.45686	0.0832516	5.4877	4.07198e-08	4.86e-05	up	TST	thiosulfate sulfurtransferase [Source:HGNC Symbol;Acc:HGNC:12388]	22	37010859	37020183	q12.3	-1
ENSG00000131355	155.203	0.913847	0.167187	5.46602	4.60244e-08	4.943e-05	up	ADGRE3	adhesion G protein-coupled receptor E3 [Source:HGNC Symbol;Acc:HGNC:23647]	19	14619117	14690027	p13.12	-1
ENSG00000143851	3754.9	-0.178096	0.0339141	-5.25139	1.50954e-07	0.0001474	down	PTPN7	protein tyrosine phosphatase non-receptor type 7 [Source:HGNC Symbol;Acc:HGNC:9659]	1	202147013	202161588	q32.1	-1
ENSG00000125347	1206.76	0.282634	0.0552745	5.11329	3.16597e-07	0.0002616	up	IRF1	interferon regulatory factor 1 [Source:HGNC Symbol;Acc:HGNC:6116]	5	132481609	132490777	q31.1	-1
ENSG00000177105	2576.95	0.209175	0.0408454	5.12113	3.03702e-07	0.0002616	up	RHOG	ras homolog family member G [Source:HGNC Symbol;Acc:HGNC:672]	11	3826978	3840959	p15.4	-1
ENSG00000079459	2194.56	0.185233	0.0366523	5.0538	4.33112e-07	0.0002997	up	FDFT1	farnesyl-diphosphate farnesyltransferase 1 [Source:HGNC Symbol;Acc:HGNC:3629]	8	11795573	11839304	p23.1	1
ENSG00000111817	1968.14	-0.206832	0.040973	-5.04801	4.46444e-07	0.0002997	down	DSE	dermatan sulfate epimerase [Source:HGNC Symbol;Acc:HGNC:21144]	6	116254173	116444860	q22.1	1
ENSG00000115919	9267.57	0.249945	0.0493074	5.06912	3.99652e-07	0.0002997	up	KYNU	kynureninase [Source:HGNC Symbol;Acc:HGNC:6469]	2	142877657	143055833	q22.2	1
ENSG00000136383	1988.34	-0.263093	0.0523534	-5.02534	5.02542e-07	0.0003175	down	ALPK3	alpha kinase 3 [Source:HGNC Symbol;Acc:HGNC:17574]	15	84816680	84873482	q25.3	1
ENSG00000141480	6362.06	0.133279	0.0269356	4.94807	7.49524e-07	0.0004473	up	ARRB2	arrestin beta 2 [Source:HGNC Symbol;Acc:HGNC:712]	17	4710596	4721499	p13.2	1
ENSG00000146859	2392.25	0.169736	0.0344951	4.92058	8.62867e-07	0.0004696	up	TMEM140	transmembrane protein 140 [Source:HGNC Symbol;Acc:HGNC:21870]	7	135148072	135166215	q33	1
ENSG00000162976	1234.55	0.257963	0.0525429	4.90956	9.12799e-07	0.0004696	up	SLC66A3	solute carrier family 66 member 3 [Source:HGNC Symbol;Acc:HGNC:28503]	2	11155198	11178870	p25.1	1
ENSG00000169439	16529.8	0.17169	0.0351065	4.89054	1.0056e-06	0.0004696	up	SDC2	syndecan 2 [Source:HGNC Symbol;Acc:HGNC:10659]	8	96493813	96611790	q22.1	1
ENSG00000198771	569.521	0.376035	0.0768185	4.89511	9.82484e-07	0.0004696	up	RCSD1	RCSD domain containing 1 [Source:HGNC Symbol;Acc:HGNC:28310]	1	167630093	167708696	q24.2	1
ENSG00000266094	2222.7	0.192057	0.0391433	4.90651	9.27092e-07	0.0004696	up	RASSF5	Ras association domain family member 5 [Source:HGNC Symbol;Acc:HGNC:17609]	1	206507531	206589448	q32.1	1
ENSG00000128050	1334.82	-0.267781	0.0549654	-4.8718	1.10587e-06	0.0004949	down	PAICS	phosphoribosylaminoimidazole carboxylase and phosphoribosylaminoimidazolesuccinocarboxamide synthase [Source:HGNC Symbol;Acc:HGNC:8587]	4	56435741	56464579	q12	1
ENSG00000143384	5109.55	0.203889	0.0422159	4.82968	1.36752e-06	0.0005875	up	MCL1	MCL1 apoptosis regulator, BCL2 family member [Source:HGNC Symbol;Acc:HGNC:6943]	1	150574551	150579738	q21.2	-1
ENSG00000138378	148.398	0.631021	0.130999	4.81698	1.4575e-06	0.0006021	up	STAT4	signal transducer and activator of transcription 4 [Source:HGNC Symbol;Acc:HGNC:11365]	2	191029576	191151596	q32.3	-1
ENSG00000102317	4174.56	-0.16473	0.0344623	-4.77999	1.75304e-06	0.0006974	down	RBM3	RNA binding motif protein 3 [Source:HGNC Symbol;Acc:HGNC:9900]	X	48574449	48581162	p11.23	1
ENSG00000059377	2043.93	0.193262	0.040521	4.76943	1.84749e-06	0.0007077	up	TBXAS1	thromboxane A synthase 1 [Source:HGNC Symbol;Acc:HGNC:11609]	7	139777051	140020325	q34	1
ENSG00000100100	664.695	0.346438	0.0727681	4.76085	1.92776e-06	0.0007077	up	PIK3IP1	phosphoinositide-3-kinase interacting protein 1 [Source:HGNC Symbol;Acc:HGNC:24942]	22	31281594	31292534	q12.2	-1
ENSG00000124882	96.1137	0.581955	0.122385	4.75511	1.98342e-06	0.0007077	up	EREG	epiregulin [Source:HGNC Symbol;Acc:HGNC:3443]	4	74365145	74388749	q13.3	1
ENSG00000169189	958.144	0.216213	0.0455264	4.74918	2.04248e-06	0.0007077	up	NSMCE1	NSE1 homolog, SMC5-SMC6 complex component [Source:HGNC Symbol;Acc:HGNC:29897]	16	27224994	27268772	p12.1	-1
ENSG00000179593	992.914	0.312557	0.0669754	4.66675	3.06006e-06	0.001027	up	ALOX15B	arachidonate 15-lipoxygenase type B [Source:HGNC Symbol;Acc:HGNC:434]	17	8039034	8049134	p13.1	1
ENSG00000160570	855.896	0.340394	0.0731313	4.65456	3.2467e-06	0.001057	up	DEDD2	death effector domain containing 2 [Source:HGNC Symbol;Acc:HGNC:24450]	19	42198598	42220140	q13.2	-1
ENSG00000125844	7429.87	-0.221129	0.047737	-4.63224	3.61734e-06	0.001143	down	RRBP1	ribosome binding protein 1 [Source:HGNC Symbol;Acc:HGNC:10448]	20	17613678	17682295	p12.1	-1
ENSG00000157510	4600.73	-0.197116	0.042686	-4.61781	3.8781e-06	0.00119	down	AFAP1L1	actin filament associated protein 1 like 1 [Source:HGNC Symbol;Acc:HGNC:26714]	5	149271859	149343637	q32	1
ENSG00000154330	103.137	0.600733	0.131885	4.55499	5.2387e-06	0.001521	up	PGM5	phosphoglucomutase 5 [Source:HGNC Symbol;Acc:HGNC:8908]	9	68328308	68531061	q21.11	1
ENSG00000167552	6949.55	0.146189	0.0320819	4.55674	5.19545e-06	0.001521	up	TUBA1A	tubulin alpha 1a [Source:HGNC Symbol;Acc:HGNC:20766]	12	49184795	49189080	q13.12	-1
ENSG00000176788	2844.96	0.408624	0.0898862	4.54601	5.46714e-06	0.001545	up	BASP1	brain abundant membrane attached signal protein 1 [Source:HGNC Symbol;Acc:HGNC:957]	5	17065598	17276843	p15.1	1
ENSG00000172594	148.296	0.586686	0.129621	4.52618	6.00602e-06	0.001654	up	SMPDL3A	sphingomyelin phosphodiesterase acid like 3A [Source:HGNC Symbol;Acc:HGNC:17389]	6	122789049	122809720	q22.31	1
ENSG00000162144	6766.51	0.241937	0.0539313	4.48603	7.25617e-06	0.001948	up	CYB561A3	cytochrome b561 family member A3 [Source:HGNC Symbol;Acc:HGNC:23014]	11	61348745	61362299	q12.2	-1
ENSG00000135316	3923.94	-0.164567	0.03684	-4.46708	7.92954e-06	0.002077	down	SYNCRIP	synaptotagmin binding cytoplasmic RNA interacting protein [Source:HGNC Symbol;Acc:HGNC:16918]	6	85607785	85643792	q14.3	-1
ENSG00000184588	219.574	0.559891	0.125606	4.45753	8.29092e-06	0.00212	up	PDE4B	phosphodiesterase 4B [Source:HGNC Symbol;Acc:HGNC:8781]	1	65792514	66374579	p31.3	1
ENSG00000175040	530.42	0.485527	0.109102	4.4502	8.57886e-06	0.002143	up	CHST2	carbohydrate sulfotransferase 2 [Source:HGNC Symbol;Acc:HGNC:1970]	3	143119771	143124014	q24	1
ENSG00000138764	461.919	0.304771	0.068626	4.44105	8.95228e-06	0.002185	up	CCNG2	cyclin G2 [Source:HGNC Symbol;Acc:HGNC:1593]	4	77157207	77433388	q21.1	1
ENSG00000137145	6686.21	-0.203605	0.0459261	-4.43332	9.2793e-06	0.002215	down	DENND4C	DENN domain containing 4C [Source:HGNC Symbol;Acc:HGNC:26079]	9	19230435	19373545	p22.1	1
ENSG00000105835	1671.97	0.419303	0.0952174	4.40364	1.06448e-05	0.002436	up	NAMPT	nicotinamide phosphoribosyltransferase [Source:HGNC Symbol;Acc:HGNC:30092]	7	106248298	106286326	q22.3	-1
ENSG00000134668	3502.84	-0.229846	0.0522184	-4.40162	1.07448e-05	0.002436	down	SPOCD1	SPOC domain containing 1 [Source:HGNC Symbol;Acc:HGNC:26338]	1	31790422	31816051	p35.2	-1
ENSG00000171049	90.0613	0.813886	0.185024	4.39881	1.08844e-05	0.002436	up	FPR2	formyl peptide receptor 2 [Source:HGNC Symbol;Acc:HGNC:3827]	19	51752026	51770531	q13.41	1
ENSG00000129559	706.33	0.308013	0.0702297	4.38579	1.15565e-05	0.002533	up	NEDD8	NEDD8 ubiquitin like modifier [Source:HGNC Symbol;Acc:HGNC:7732]	14	24216857	24232367	q12	-1
ENSG00000039560	1254.28	-0.218344	0.0501715	-4.35195	1.34934e-05	0.002852	down	RAI14	retinoic acid induced 14 [Source:HGNC Symbol;Acc:HGNC:14873]	5	34656328	34832612	p13.2	1
ENSG00000104081	400.727	0.346937	0.0800388	4.3346	1.46022e-05	0.002852	up	BMF	Bcl2 modifying factor [Source:HGNC Symbol;Acc:HGNC:24132]	15	40087890	40108892	q15.1	-1
ENSG00000144455	3053.5	0.179959	0.0414031	4.3465	1.38328e-05	0.002852	up	SUMF1	sulfatase modifying factor 1 [Source:HGNC Symbol;Acc:HGNC:20376]	3	3700814	4467273	p26.1	-1
ENSG00000158186	9351.66	-0.145192	0.0334683	-4.3382	1.43657e-05	0.002852	down	MRAS	muscle RAS oncogene homolog [Source:HGNC Symbol;Acc:HGNC:7227]	3	138347648	138405534	q22.3	1
ENSG00000171051	216.925	0.549871	0.12679	4.33686	1.44533e-05	0.002852	up	FPR1	formyl peptide receptor 1 [Source:HGNC Symbol;Acc:HGNC:3826]	19	51745172	51804110	q13.41	-1
ENSG00000184602	3078.86	0.235627	0.0543275	4.33716	1.44334e-05	0.002852	up	SNN	stannin [Source:HGNC Symbol;Acc:HGNC:11149]	16	11668455	11679152	p13.13	1
ENSG00000171860	426.332	0.411936	0.0951972	4.32718	1.5103e-05	0.002897	up	C3AR1	complement C3a receptor 1 [Source:HGNC Symbol;Acc:HGNC:1319]	12	8056844	8066359	p13.31	-1
ENSG00000123933	858.159	0.343667	0.0795474	4.32028	1.55831e-05	0.002936	up	MXD4	MAX dimerization protein 4 [Source:HGNC Symbol;Acc:HGNC:13906]	4	2247432	2262109	p16.3	-1
ENSG00000196396	4683.35	0.133638	0.0310169	4.30855	1.64325e-05	0.003043	up	PTPN1	protein tyrosine phosphatase non-receptor type 1 [Source:HGNC Symbol;Acc:HGNC:9642]	20	50510321	50585241	q13.13	1
ENSG00000103811	18192	0.180207	0.0421322	4.27719	1.89267e-05	0.003096	up	CTSH	cathepsin H [Source:HGNC Symbol;Acc:HGNC:2535]	15	78921058	78949574	q25.1	-1
ENSG00000104904	16475.3	0.21534	0.0503592	4.27608	1.90217e-05	0.003096	up	OAZ1	ornithine decarboxylase antizyme 1 [Source:HGNC Symbol;Acc:HGNC:8095]	19	2269509	2273490	p13.3	1
ENSG00000128567	2281.08	-0.22539	0.0524991	-4.29322	1.76103e-05	0.003096	down	PODXL	podocalyxin like [Source:HGNC Symbol;Acc:HGNC:9171]	7	131500262	131558217	q32.3	-1
ENSG00000129351	5083.21	-0.14575	0.0340527	-4.28014	1.86779e-05	0.003096	down	ILF3	interleukin enhancer binding factor 3 [Source:HGNC Symbol;Acc:HGNC:6038]	19	10654261	10692417	p13.2	1
ENSG00000145734	1211.98	-0.295015	0.068757	-4.29068	1.78126e-05	0.003096	down	BDP1	B double prime 1, subunit of RNA polymerase III transcription initiation factor IIIB [Source:HGNC Symbol;Acc:HGNC:13652]	5	71455651	71567820	q13.2	1
ENSG00000168904	5723.4	-0.200783	0.0469117	-4.28002	1.86881e-05	0.003096	down	LRRC28	leucine rich repeat containing 28 [Source:HGNC Symbol;Acc:HGNC:28355]	15	99251362	99390729	q26.3	1
ENSG00000197006	3387.22	0.184357	0.04309	4.27841	1.88235e-05	0.003096	up	METTL9	methyltransferase like 9 [Source:HGNC Symbol;Acc:HGNC:24586]	16	21597218	21657473	p12.2	1
ENSG00000221995	131.66	-0.489029	0.11416	-4.28371	1.83802e-05	0.003096	down	TIAF1	TGFB1-induced anti-apoptotic factor 1 [Source:HGNC Symbol;Acc:HGNC:11803]	17	29073521	29078857	q11.2	-1
ENSG00000008853	4184.17	-0.232766	0.0547335	-4.25271	2.11196e-05	0.003243	down	RHOBTB2	Rho related BTB domain containing 2 [Source:HGNC Symbol;Acc:HGNC:18756]	8	22987417	23020199	p21.3	1
ENSG00000059804	957.768	0.338747	0.0798261	4.24356	2.2e-05	0.003243	up	SLC2A3	solute carrier family 2 member 3 [Source:HGNC Symbol;Acc:HGNC:11007]	12	7919230	7936187	p13.31	-1
ENSG00000111859	762.178	-0.265528	0.0624114	-4.25447	2.09541e-05	0.003243	down	NEDD9	neural precursor cell expressed, developmentally down-regulated 9 [Source:HGNC Symbol;Acc:HGNC:7733]	6	11183298	11382348	p24.2	-1
ENSG00000137193	4616.85	0.176967	0.0417055	4.24326	2.20301e-05	0.003243	up	PIM1	Pim-1 proto-oncogene, serine/threonine kinase [Source:HGNC Symbol;Acc:HGNC:8986]	6	37170152	37175428	p21.2	1
ENSG00000162490	496.01	-0.330821	0.0779666	-4.24311	2.2044e-05	0.003243	down	DRAXIN	dorsal inhibitory axon guidance protein [Source:HGNC Symbol;Acc:HGNC:25054]	1	11691710	11725857	p36.22	1
ENSG00000198223	387.364	0.351684	0.0827306	4.25096	2.12855e-05	0.003243	up	CSF2RA	colony stimulating factor 2 receptor alpha subunit [Source:HGNC Symbol;Acc:HGNC:2435]	X	1268800	1310381	p22.33	1
ENSG00000255398	239.081	0.386581	0.0907118	4.26163	2.02938e-05	0.003243	up	HCAR3	hydroxycarboxylic acid receptor 3 [Source:HGNC Symbol;Acc:HGNC:16824]	12	122714756	122716811	q24.31	-1
ENSG00000155090	1003.01	-0.231662	0.054879	-4.22132	2.42874e-05	0.003525	down	KLF10	Kruppel like factor 10 [Source:HGNC Symbol;Acc:HGNC:11810]	8	102648784	102655725	q22.3	-1
ENSG00000115355	10102.2	-0.273897	0.0649954	-4.2141	2.50772e-05	0.003532	down	CCDC88A	coiled-coil domain containing 88A [Source:HGNC Symbol;Acc:HGNC:25523]	2	55287842	55419895	p16.1	-1
ENSG00000198814	1020.32	0.239111	0.0567081	4.21653	2.48089e-05	0.003532	up	GK	glycerol kinase [Source:HGNC Symbol;Acc:HGNC:4289]	X	30653359	30731456	p21.2	1
ENSG00000249992	85.1276	0.676206	0.160545	4.21194	2.53189e-05	0.003532	up	TMEM158	transmembrane protein 158 (gene/pseudogene) [Source:HGNC Symbol;Acc:HGNC:30293]	3	45224466	45226287	p21.31	-1
ENSG00000167642	310.457	0.510177	0.121355	4.20399	2.62253e-05	0.003611	up	SPINT2	serine peptidase inhibitor, Kunitz type 2 [Source:HGNC Symbol;Acc:HGNC:11247]	19	38244035	38292615	q13.2	1
ENSG00000027697	4186.56	0.208803	0.0497052	4.20083	2.65934e-05	0.003616	up	IFNGR1	interferon gamma receptor 1 [Source:HGNC Symbol;Acc:HGNC:5439]	6	137197484	137219449	q23.3	-1
ENSG00000130559	3160.85	-0.171977	0.0410279	-4.19171	2.76865e-05	0.003658	down	CAMSAP1	calmodulin regulated spectrin associated protein 1 [Source:HGNC Symbol;Acc:HGNC:19946]	9	135808487	135907546	q34.3	-1
ENSG00000132581	611.16	0.262895	0.0627474	4.18974	2.79272e-05	0.003658	up	SDF2	stromal cell derived factor 2 [Source:HGNC Symbol;Acc:HGNC:10675]	17	28648346	28662189	q11.2	-1
ENSG00000159200	996.696	0.270689	0.0645544	4.1932	2.7505e-05	0.003658	up	RCAN1	regulator of calcineurin 1 [Source:HGNC Symbol;Acc:HGNC:3040]	21	34513142	34615113	q22.12	-1
ENSG00000132688	1378.69	-0.34252	0.0818379	-4.18535	2.84731e-05	0.003685	down	NES	nestin [Source:HGNC Symbol;Acc:HGNC:7756]	1	156668763	156677407	q23.1	-1
ENSG00000165475	1036.36	0.228054	0.0545812	4.17825	2.93758e-05	0.003712	up	CRYL1	crystallin lambda 1 [Source:HGNC Symbol;Acc:HGNC:18246]	13	20403666	20525873	q12.11	-1
ENSG00000184557	1137.68	0.306731	0.0733938	4.17925	2.92474e-05	0.003712	up	SOCS3	suppressor of cytokine signaling 3 [Source:HGNC Symbol;Acc:HGNC:19391]	17	78356778	78360077	q25.3	-1
ENSG00000164164	3612.72	-0.198835	0.0476336	-4.17426	2.98961e-05	0.003734	down	OTUD4	OTU deubiquitinase 4 [Source:HGNC Symbol;Acc:HGNC:24949]	4	145110838	145180589	q31.21	-1
ENSG00000110841	738.886	-0.282905	0.0678354	-4.17047	3.03974e-05	0.003753	down	PPFIBP1	PPFIA binding protein 1 [Source:HGNC Symbol;Acc:HGNC:9249]	12	27523431	27695564	p11.23	1
ENSG00000010256	6138.38	0.136004	0.0326855	4.16098	3.1688e-05	0.003807	up	UQCRC1	ubiquinol-cytochrome c reductase core protein 1 [Source:HGNC Symbol;Acc:HGNC:12585]	3	48599002	48610976	p21.31	-1
ENSG00000118508	935.901	0.356936	0.0858657	4.15691	3.22576e-05	0.003807	up	RAB32	RAB32, member RAS oncogene family [Source:HGNC Symbol;Acc:HGNC:9772]	6	146543833	146554953	q24.3	1
ENSG00000135929	32991.3	0.194143	0.0466975	4.15745	3.21814e-05	0.003807	up	CYP27A1	cytochrome P450 family 27 subfamily A member 1 [Source:HGNC Symbol;Acc:HGNC:2605]	2	218781749	218815293	q35	1
ENSG00000165732	2999.04	-0.1633	0.0392605	-4.15939	3.19104e-05	0.003807	down	DDX21	DExD-box helicase 21 [Source:HGNC Symbol;Acc:HGNC:2744]	10	68956170	68985068	q22.1	1
ENSG00000130775	3129.98	0.153751	0.0371407	4.1397	3.47763e-05	0.003953	up	THEMIS2	thymocyte selection associated family member 2 [Source:HGNC Symbol;Acc:HGNC:16839]	1	27872543	27886685	p35.3	1
ENSG00000135604	1549.76	0.265981	0.0642679	4.13864	3.49376e-05	0.003953	up	STX11	syntaxin 11 [Source:HGNC Symbol;Acc:HGNC:11429]	6	144150517	144191939	q24.2	1
ENSG00000138613	372.868	0.295482	0.0713989	4.13847	3.49633e-05	0.003953	up	APH1B	aph-1 homolog B, gamma-secretase subunit [Source:HGNC Symbol;Acc:HGNC:24080]	15	63276018	63309126	q22.2	1
ENSG00000158828	906.321	0.256206	0.0618906	4.13966	3.47818e-05	0.003953	up	PINK1	PTEN induced kinase 1 [Source:HGNC Symbol;Acc:HGNC:14581]	1	20633458	20651511	p36.12	1
ENSG00000126353	173.225	0.423974	0.102522	4.13546	3.54247e-05	0.003964	up	CCR7	C-C motif chemokine receptor 7 [Source:HGNC Symbol;Acc:HGNC:1608]	17	40553769	40565472	q21.2	-1
ENSG00000130202	1642	0.23249	0.0563307	4.12723	3.67152e-05	0.003967	up	NECTIN2	nectin cell adhesion molecule 2 [Source:HGNC Symbol;Acc:HGNC:9707]	19	44846175	44889223	q13.32	1
ENSG00000131669	2756.84	0.316137	0.0766006	4.12709	3.67388e-05	0.003967	up	NINJ1	ninjurin 1 [Source:HGNC Symbol;Acc:HGNC:7824]	9	93121496	93134251	q22.31	-1
ENSG00000166927	4380.45	0.234624	0.0568668	4.12585	3.69361e-05	0.003967	up	MS4A7	membrane spanning 4-domains A7 [Source:HGNC Symbol;Acc:HGNC:13378]	11	60378485	60395951	q12.2	1
ENSG00000198162	912.934	-0.213369	0.0516333	-4.13239	3.59008e-05	0.003967	down	MAN1A2	mannosidase alpha class 1A member 2 [Source:HGNC Symbol;Acc:HGNC:6822]	1	117367449	117528872	p12	1
ENSG00000277969	266.506	0.328931	0.0797825	4.12284	3.74225e-05	0.00398	up		novel transcript	17	38702452	38704747	q12	1
ENSG00000090238	329.058	0.401019	0.0974472	4.11524	3.86772e-05	0.004031	up	YPEL3	yippee like 3 [Source:HGNC Symbol;Acc:HGNC:18327]	16	30092314	30096915	p11.2	-1
ENSG00000100600	2077.38	0.197332	0.0480077	4.11043	3.94929e-05	0.004031	up	LGMN	legumain [Source:HGNC Symbol;Acc:HGNC:9472]	14	92703807	92748679	q32.12	-1
ENSG00000111707	766.481	0.202273	0.0492559	4.10656	4.01593e-05	0.004031	up	SUDS3	SDS3 homolog, SIN3A corepressor complex component [Source:HGNC Symbol;Acc:HGNC:29545]	12	118376555	118418033	q24.23	1
ENSG00000144674	2177.63	-0.259929	0.0632375	-4.11036	3.95038e-05	0.004031	down	GOLGA4	golgin A4 [Source:HGNC Symbol;Acc:HGNC:4427]	3	37243177	37366751	p22.2	1
ENSG00000170458	370.375	0.605648	0.147409	4.10863	3.98018e-05	0.004031	up	CD14	CD14 molecule [Source:HGNC Symbol;Acc:HGNC:1628]	5	140631728	140633701	q31.3	-1
ENSG00000171858	1708.39	0.350963	0.0853012	4.11439	3.88202e-05	0.004031	up	RPS21	ribosomal protein S21 [Source:HGNC Symbol;Acc:HGNC:10409]	20	62387103	62388520	q13.33	1
ENSG00000155307	454.124	0.418899	0.102589	4.08328	4.44036e-05	0.004376	up	SAMSN1	SAM domain, SH3 domain and nuclear localization signals 1 [Source:HGNC Symbol;Acc:HGNC:10528]	21	14485228	14658821	q11.2	-1
ENSG00000206503	48215.2	0.175893	0.0430657	4.08429	4.42124e-05	0.004376	up	HLA-A	major histocompatibility complex, class I, A [Source:HGNC Symbol;Acc:HGNC:4931]	6	29941260	29945884	p22.1	1
ENSG00000084710	290.463	-0.376519	0.0923093	-4.07888	4.52528e-05	0.004379	down	EFR3B	EFR3 homolog B [Source:HGNC Symbol;Acc:HGNC:29155]	2	25042076	25159135	p23.3	1
ENSG00000104825	835.337	0.364729	0.089393	4.08007	4.50222e-05	0.004379	up	NFKBIB	NFKB inhibitor beta [Source:HGNC Symbol;Acc:HGNC:7798]	19	38899700	38908893	q13.2	1
ENSG00000117691	952.594	0.303299	0.0744521	4.07375	4.62621e-05	0.004414	up	NENF	neudesin neurotrophic factor [Source:HGNC Symbol;Acc:HGNC:30384]	1	212432920	212446379	q32.3	1
ENSG00000157191	3511.64	0.160869	0.0394976	4.07287	4.64378e-05	0.004414	up	NECAP2	NECAP endocytosis associated 2 [Source:HGNC Symbol;Acc:HGNC:25528]	1	16440721	16460078	p36.13	1
ENSG00000109099	292.493	0.36002	0.0886048	4.06321	4.84023e-05	0.004512	up	PMP22	peripheral myelin protein 22 [Source:HGNC Symbol;Acc:HGNC:9118]	17	15229777	15265326	p12	-1
ENSG00000125657	232.407	0.561226	0.138178	4.06163	4.87319e-05	0.004512	up	TNFSF9	TNF superfamily member 9 [Source:HGNC Symbol;Acc:HGNC:11939]	19	6531026	6535924	p13.3	1
ENSG00000147123	1184.47	0.298202	0.073414	4.06193	4.86694e-05	0.004512	up	NDUFB11	NADH:ubiquinone oxidoreductase subunit B11 [Source:HGNC Symbol;Acc:HGNC:20372]	X	47142216	47145504	p11.3	-1
ENSG00000157483	4939.48	-0.165743	0.0409311	-4.04933	5.13644e-05	0.004715	down	MYO1E	myosin IE [Source:HGNC Symbol;Acc:HGNC:7599]	15	59132434	59372871	q22.2	-1
ENSG00000166523	646.859	0.334636	0.0827205	4.04539	5.22367e-05	0.004755	up	CLEC4E	C-type lectin domain family 4 member E [Source:HGNC Symbol;Acc:HGNC:14555]	12	8533305	8540905	p13.31	-1
ENSG00000101265	1544.29	-0.191563	0.0474368	-4.03828	5.3844e-05	0.00478	down	RASSF2	Ras association domain family member 2 [Source:HGNC Symbol;Acc:HGNC:9883]	20	4780023	4823608	p13	-1
ENSG00000125898	202.81	0.565934	0.140063	4.04056	5.33248e-05	0.00478	up	FAM110A	family with sequence similarity 110 member A [Source:HGNC Symbol;Acc:HGNC:16188]	20	833715	857463	p13	1
ENSG00000173391	1368.85	0.333152	0.0824785	4.03926	5.36197e-05	0.00478	up	OLR1	oxidized low density lipoprotein receptor 1 [Source:HGNC Symbol;Acc:HGNC:8133]	12	10158301	10172138	p13.2	-1
ENSG00000180263	1985.89	-0.255796	0.0634285	-4.03283	5.51088e-05	0.004852	down	FGD6	FYVE, RhoGEF and PH domain containing 6 [Source:HGNC Symbol;Acc:HGNC:21740]	12	95076749	95217482	q22	-1
ENSG00000135905	3504.93	-0.210251	0.0522084	-4.02716	5.64553e-05	0.00493	down	DOCK10	dedicator of cytokinesis 10 [Source:HGNC Symbol;Acc:HGNC:23479]	2	224765090	225042445	q36.2	-1
ENSG00000116127	399.116	-0.353487	0.0879608	-4.01869	5.85228e-05	0.005036	down	ALMS1	ALMS1 centrosome and basal body associated protein [Source:HGNC Symbol;Acc:HGNC:428]	2	73385758	73625166	p13.1	1
ENSG00000180304	3045.58	0.216038	0.0537629	4.01834	5.86103e-05	0.005036	up	OAZ2	ornithine decarboxylase antizyme 2 [Source:HGNC Symbol;Acc:HGNC:8096]	15	64687573	64703281	q22.31	-1
ENSG00000119514	3461.07	-0.143878	0.0358611	-4.0121	6.01812e-05	0.00509	down	GALNT12	polypeptide N-acetylgalactosaminyltransferase 12 [Source:HGNC Symbol;Acc:HGNC:19877]	9	98807670	98850081	q22.33	1
ENSG00000214063	1074.31	0.25927	0.0646073	4.01302	5.99469e-05	0.00509	up	TSPAN4	tetraspanin 4 [Source:HGNC Symbol;Acc:HGNC:11859]	11	842812	867116	p15.5	1
ENSG00000070731	459.05	0.274552	0.0684681	4.00993	6.07374e-05	0.005097	up	ST6GALNAC2	ST6 N-acetylgalactosaminide alpha-2,6-sialyltransferase 2 [Source:HGNC Symbol;Acc:HGNC:10867]	17	76565377	76586956	q25.1	-1
ENSG00000153208	826.522	-0.248341	0.0619912	-4.00607	6.17368e-05	0.00514	down	MERTK	MER proto-oncogene, tyrosine kinase [Source:HGNC Symbol;Acc:HGNC:7027]	2	111898607	112029561	q13	1
ENSG00000172716	1990.39	-0.206543	0.0515992	-4.00284	6.25865e-05	0.005171	down	SLFN11	schlafen family member 11 [Source:HGNC Symbol;Acc:HGNC:26633]	17	35350305	35373701	q12	-1
ENSG00000021355	2231.87	0.195141	0.0488056	3.99832	6.37933e-05	0.005231	up	SERPINB1	serpin family B member 1 [Source:HGNC Symbol;Acc:HGNC:3311]	6	2832332	2841959	p25.2	-1
ENSG00000177200	4181.46	-0.249458	0.0624604	-3.99386	6.50068e-05	0.00529	down	CHD9	chromodomain helicase DNA binding protein 9 [Source:HGNC Symbol;Acc:HGNC:25701]	16	53055033	53329150	q12.2	1
ENSG00000187555	3063.9	-0.176637	0.0442805	-3.98906	6.63355e-05	0.005357	down	USP7	ubiquitin specific peptidase 7 [Source:HGNC Symbol;Acc:HGNC:12630]	16	8892097	8964514	p13.2	-1
ENSG00000123130	2059.27	0.182904	0.0459406	3.98131	6.8537e-05	0.005464	up	ACOT9	acyl-CoA thioesterase 9 [Source:HGNC Symbol;Acc:HGNC:17152]	X	23701055	23766475	p22.11	-1
ENSG00000145107	3560.13	-0.272738	0.068513	-3.98082	6.86776e-05	0.005464	down	TM4SF19	transmembrane 4 L six family member 19 [Source:HGNC Symbol;Acc:HGNC:25167]	3	196319342	196338503	q29	-1
ENSG00000184277	553.701	0.264093	0.0663945	3.97763	6.96052e-05	0.005468	up	TM2D3	TM2 domain containing 3 [Source:HGNC Symbol;Acc:HGNC:24128]	15	101621444	101652391	q26.3	-1
ENSG00000261269	1872.16	-0.232777	0.0585282	-3.97718	6.97387e-05	0.005468	down		novel transcript, overlapping ZNF366	5	72439903	72442387	q13.2	-1
ENSG00000109103	716.864	0.251154	0.0631975	3.97411	7.06435e-05	0.005498	up	UNC119	unc-119 lipid binding chaperone [Source:HGNC Symbol;Acc:HGNC:12565]	17	28546707	28552668	q11.2	-1
ENSG00000116514	481.644	0.268346	0.0676056	3.96928	7.20903e-05	0.005571	up	RNF19B	ring finger protein 19B [Source:HGNC Symbol;Acc:HGNC:26886]	1	32936445	32964685	p35.1	-1
ENSG00000092439	2309.18	-0.186931	0.0471324	-3.96609	7.30628e-05	0.005605	down	TRPM7	transient receptor potential cation channel subfamily M member 7 [Source:HGNC Symbol;Acc:HGNC:17994]	15	50552473	50686797	q21.2	-1
ENSG00000131446	20822.8	0.177475	0.0447935	3.96207	7.43032e-05	0.00562	up	MGAT1	mannosyl (alpha-1,3-)-glycoprotein beta-1,2-N-acetylglucosaminyltransferase [Source:HGNC Symbol;Acc:HGNC:7044]	5	180784782	180815652	q35.3	-1
ENSG00000245060	1249.77	0.175478	0.0442733	3.96352	7.38541e-05	0.00562	up	LINC00847	long intergenic non-protein coding RNA 847 [Source:HGNC Symbol;Acc:HGNC:45050]	5	180830326	180839742	q35.3	1
ENSG00000196535	3555.34	-0.146304	0.0370017	-3.95399	7.68586e-05	0.005773	down	MYO18A	myosin XVIIIA [Source:HGNC Symbol;Acc:HGNC:31104]	17	29071124	29180412	q11.2	-1
ENSG00000168899	101.659	0.584932	0.148239	3.94587	7.95101e-05	0.005931	up	VAMP5	vesicle associated membrane protein 5 [Source:HGNC Symbol;Acc:HGNC:12646]	2	85584431	85593406	p11.2	1
ENSG00000007923	1526.42	-0.164999	0.0418774	-3.94005	8.1466e-05	0.005953	down	DNAJC11	DnaJ heat shock protein family (Hsp40) member C11 [Source:HGNC Symbol;Acc:HGNC:25570]	1	6634168	6701924	p36.31	-1
ENSG00000072694	534.017	0.377276	0.0957311	3.941	8.11426e-05	0.005953	up	FCGR2B	Fc fragment of IgG receptor IIb [Source:HGNC Symbol;Acc:HGNC:3618]	1	161663147	161678654	q23.3	1
ENSG00000168286	279.286	0.339378	0.0860955	3.94187	8.08478e-05	0.005953	up	THAP11	THAP domain containing 11 [Source:HGNC Symbol;Acc:HGNC:23194]	16	67842320	67844195	q22.1	1
ENSG00000084207	3143.27	0.209713	0.0532667	3.93704	8.24925e-05	0.005987	up	GSTP1	glutathione S-transferase pi 1 [Source:HGNC Symbol;Acc:HGNC:4638]	11	67583595	67586656	q13.2	1
ENSG00000111269	1833.34	0.164443	0.0418716	3.92731	8.59019e-05	0.006192	up	CREBL2	cAMP responsive element binding protein like 2 [Source:HGNC Symbol;Acc:HGNC:2350]	12	12611827	12645108	p13.1	1
ENSG00000095002	655.625	-0.241422	0.0615319	-3.92352	8.72648e-05	0.006237	down	MSH2	mutS homolog 2 [Source:HGNC Symbol;Acc:HGNC:7325]	2	47402969	47663146	p21	1
ENSG00000183255	4650.82	0.116962	0.0298315	3.92077	8.82666e-05	0.006237	up	PTTG1IP	PTTG1 interacting protein [Source:HGNC Symbol;Acc:HGNC:13524]	21	44849585	44873903	q22.3	-1
ENSG00000198146	724.63	-0.238595	0.0608417	-3.92157	8.79733e-05	0.006237	down	ZNF770	zinc finger protein 770 [Source:HGNC Symbol;Acc:HGNC:26061]	15	34978341	34988287	q14	-1
ENSG00000124207	1588.02	-0.184228	0.0470946	-3.91187	9.15854e-05	0.006362	down	CSE1L	chromosome segregation 1 like [Source:HGNC Symbol;Acc:HGNC:2431]	20	49046246	49096960	q13.13	1
ENSG00000166619	3044.79	0.11572	0.0295644	3.91416	9.07192e-05	0.006362	up	BLCAP	BLCAP apoptosis inducing factor [Source:HGNC Symbol;Acc:HGNC:1055]	20	37492472	37527931	q11.23	-1
ENSG00000235863	316.218	0.343565	0.0878398	3.91128	9.181e-05	0.006362	up	B3GALT4	beta-1,3-galactosyltransferase 4 [Source:HGNC Symbol;Acc:HGNC:919]	6	33277123	33284832	p21.32	1
ENSG00000070540	874.84	0.240636	0.0615745	3.90804	9.30471e-05	0.006407	up	WIPI1	WD repeat domain, phosphoinositide interacting 1 [Source:HGNC Symbol;Acc:HGNC:25471]	17	68420948	68457513	q24.2	-1
ENSG00000105643	487.253	0.296843	0.0760161	3.905	9.42265e-05	0.006416	up	ARRDC2	arrestin domain containing 2 [Source:HGNC Symbol;Acc:HGNC:25225]	19	18001132	18014102	p13.11	1
ENSG00000186827	220.44	0.586664	0.150249	3.90461	9.43785e-05	0.006416	up	TNFRSF4	TNF receptor superfamily member 4 [Source:HGNC Symbol;Acc:HGNC:11918]	1	1211340	1214153	p36.33	-1
ENSG00000205339	4839.83	-0.166334	0.0426401	-3.90088	9.5842e-05	0.006474	down	IPO7	importin 7 [Source:HGNC Symbol;Acc:HGNC:9852]	11	9384652	9448127	p15.4	1
ENSG00000144283	371.817	-0.301687	0.0777078	-3.88232	0.000103463	0.006946	down	PKP4	plakophilin 4 [Source:HGNC Symbol;Acc:HGNC:9026]	2	158456964	158682879	q24.1	1
ENSG00000128284	206.332	0.349879	0.0905029	3.86595	0.00011066	0.007346	up	APOL3	apolipoprotein L3 [Source:HGNC Symbol;Acc:HGNC:14868]	22	36140330	36166177	q12.3	-1
ENSG00000198707	389.945	-0.280526	0.0725686	-3.86566	0.000110789	0.007346	down	CEP290	centrosomal protein 290 [Source:HGNC Symbol;Acc:HGNC:29021]	12	88049014	88142088	q21.32	-1
ENSG00000112419	1318.72	-0.289785	0.0750218	-3.86268	0.000112148	0.00739	down	PHACTR2	phosphatase and actin regulator 2 [Source:HGNC Symbol;Acc:HGNC:20956]	6	143536845	143831185	q24.2	1
ENSG00000136710	1950.55	0.188167	0.0487352	3.86101	0.000112919	0.007395	up	CCDC115	coiled-coil domain containing 115 [Source:HGNC Symbol;Acc:HGNC:28178]	2	130337933	130342699	q21.1	-1
ENSG00000177674	1196.19	0.264876	0.068812	3.84927	0.000118472	0.007712	up	AGTRAP	angiotensin II receptor associated protein [Source:HGNC Symbol;Acc:HGNC:13539]	1	11736084	11754802	p36.22	1
ENSG00000153201	5810.17	-0.249481	0.0648871	-3.84485	0.000120626	0.007758	down	RANBP2	RAN binding protein 2 [Source:HGNC Symbol;Acc:HGNC:9848]	2	108719482	108785809	q13	1
ENSG00000170525	3037.04	0.17564	0.0456773	3.84523	0.000120441	0.007758	up	PFKFB3	6-phosphofructo-2-kinase/fructose-2,6-biphosphatase 3 [Source:HGNC Symbol;Acc:HGNC:8874]	10	6144934	6254644	p15.1	1
ENSG00000101336	7830.87	0.157649	0.0410428	3.84108	0.000122495	0.007796	up	HCK	HCK proto-oncogene, Src family tyrosine kinase [Source:HGNC Symbol;Acc:HGNC:4840]	20	32052188	32101856	q11.21	1
ENSG00000148290	611.895	0.276499	0.0719908	3.84075	0.000122658	0.007796	up	SURF1	SURF1 cytochrome c oxidase assembly factor [Source:HGNC Symbol;Acc:HGNC:11474]	9	133351758	133356676	q34.2	-1
ENSG00000101474	3317.57	0.163084	0.0425399	3.83366	0.000126251	0.007977	up	APMAP	adipocyte plasma membrane associated protein [Source:HGNC Symbol;Acc:HGNC:13238]	20	24962925	24992751	p11.21	-1
ENSG00000135829	4489.54	-0.169544	0.0443152	-3.82587	0.000130313	0.008185	down	DHX9	DExH-box helicase 9 [Source:HGNC Symbol;Acc:HGNC:2750]	1	182839347	182887982	q25.3	1
ENSG00000164713	4156.64	0.253867	0.0664121	3.8226	0.000132051	0.008246	up	BRI3	brain protein I3 [Source:HGNC Symbol;Acc:HGNC:1109]	7	98252379	98310441	q21.3	1
ENSG00000103024	254.257	0.57136	0.149619	3.81876	0.000134122	0.008327	up	NME3	NME/NM23 nucleoside diphosphate kinase 3 [Source:HGNC Symbol;Acc:HGNC:7851]	16	1770286	1771730	p13.3	-1
ENSG00000053371	2187.96	0.251783	0.0660717	3.81076	0.000138539	0.008538	up	AKR7A2	aldo-keto reductase family 7 member A2 [Source:HGNC Symbol;Acc:HGNC:389]	1	19303965	19312146	p36.13	-1
ENSG00000120800	766.164	-0.253532	0.0665514	-3.80957	0.000139208	0.008538	down	UTP20	UTP20 small subunit processome component [Source:HGNC Symbol;Acc:HGNC:17897]	12	101280105	101386618	q23.2	1
ENSG00000234745	101881	0.179326	0.0470876	3.80835	0.000139895	0.008538	up	HLA-B	major histocompatibility complex, class I, B [Source:HGNC Symbol;Acc:HGNC:4932]	6	31269491	31357188	p21.33	-1
ENSG00000068796	2164.77	-0.190006	0.0499554	-3.80351	0.000142657	0.008608	down	KIF2A	kinesin family member 2A [Source:HGNC Symbol;Acc:HGNC:6318]	5	62306162	62537249	q12.1	1
ENSG00000101843	1318.28	0.22749	0.0597943	3.80455	0.000142064	0.008608	up	PSMD10	proteasome 26S subunit, non-ATPase 10 [Source:HGNC Symbol;Acc:HGNC:9555]	X	108084207	108091549	q22.3	-1
ENSG00000123342	4118.98	-0.155226	0.0408625	-3.79873	0.000145437	0.008727	down	MMP19	matrix metallopeptidase 19 [Source:HGNC Symbol;Acc:HGNC:7165]	12	55835433	55842966	q13.2	-1
ENSG00000102189	2086.14	-0.286707	0.0756264	-3.7911	0.000149979	0.00895	down	EEA1	early endosome antigen 1 [Source:HGNC Symbol;Acc:HGNC:3185]	12	92770637	92929331	q22	-1
ENSG00000075142	766.944	0.219921	0.0580348	3.78946	0.000150973	0.008959	up	SRI	sorcin [Source:HGNC Symbol;Acc:HGNC:11292]	7	88205118	88226993	q21.12	-1
ENSG00000158716	696.106	0.414844	0.109518	3.78791	0.000151922	0.008966	up	DUSP23	dual specificity phosphatase 23 [Source:HGNC Symbol;Acc:HGNC:21480]	1	159780932	159782543	q23.2	1
ENSG00000137207	1980.73	0.130152	0.0343912	3.78445	0.00015405	0.008993	up	YIPF3	Yip1 domain family member 3 [Source:HGNC Symbol;Acc:HGNC:21023]	6	43511832	43516985	p21.1	-1
ENSG00000197961	375.865	-0.383589	0.101336	-3.78534	0.000153499	0.008993	down	ZNF121	zinc finger protein 121 [Source:HGNC Symbol;Acc:HGNC:12904]	19	9560353	9584533	p13.2	-1
ENSG00000168101	1079.89	0.317479	0.0839526	3.78165	0.000155791	0.008997	up	NUDT16L1	nudix hydrolase 16 like 1 [Source:HGNC Symbol;Acc:HGNC:28154]	16	4693694	4695859	p13.3	1
ENSG00000233276	14599	0.288912	0.0763828	3.78243	0.000155306	0.008997	up	GPX1	glutathione peroxidase 1 [Source:HGNC Symbol;Acc:HGNC:4553]	3	49357176	49358358	p21.31	-1
ENSG00000130222	227.84	0.768619	0.203425	3.77838	0.000157852	0.009067	up	GADD45G	growth arrest and DNA damage inducible gamma [Source:HGNC Symbol;Acc:HGNC:4097]	9	89605012	89606555	q22.2	1
ENSG00000214253	1838.51	0.237285	0.0628403	3.776	0.000159364	0.009105	up	FIS1	fission, mitochondrial 1 [Source:HGNC Symbol;Acc:HGNC:21689]	7	101239458	101252316	q22.1	-1
ENSG00000196305	10539.1	-0.158972	0.0421666	-3.7701	0.000163179	0.009274	down	IARS	isoleucyl-tRNA synthetase [Source:HGNC Symbol;Acc:HGNC:5330]	9	92210207	92293756	q22.31	-1
ENSG00000042753	5344.48	0.211507	0.0562234	3.76191	0.000168619	0.009532	up	AP2S1	adaptor related protein complex 2 subunit sigma 1 [Source:HGNC Symbol;Acc:HGNC:565]	19	46838136	46850992	q13.32	-1
ENSG00000108639	5189.17	0.139198	0.0370993	3.75203	0.000175406	0.009846	up	SYNGR2	synaptogyrin 2 [Source:HGNC Symbol;Acc:HGNC:11499]	17	78168558	78173527	q25.3	1
ENSG00000123689	560.908	0.792151	0.211173	3.75119	0.000175996	0.009846	up	G0S2	G0/G1 switch 2 [Source:HGNC Symbol;Acc:HGNC:30229]	1	209675412	209676390	q32.2	1
ENSG00000145860	1678.27	0.219679	0.0586528	3.74542	0.000180094	0.01002	up	RNF145	ring finger protein 145 [Source:HGNC Symbol;Acc:HGNC:20853]	5	159157409	159210053	q33.3	-1
ENSG00000082996	5722.57	0.121514	0.0324573	3.74381	0.000181249	0.01004	up	RNF13	ring finger protein 13 [Source:HGNC Symbol;Acc:HGNC:10057]	3	149812708	149962139	q25.1	1
ENSG00000111206	153.488	-0.512611	0.137048	-3.74039	0.000183738	0.01012	down	FOXM1	forkhead box M1 [Source:HGNC Symbol;Acc:HGNC:3818]	12	2857681	2877155	p13.33	-1
ENSG00000182149	3592.97	0.115972	0.0310286	3.73759	0.000185792	0.01018	up	IST1	IST1 factor associated with ESCRT-III [Source:HGNC Symbol;Acc:HGNC:28977]	16	71845996	71931199	q22.2	1
ENSG00000124098	1515.99	0.164508	0.0440628	3.73348	0.00018885	0.01024	up	FAM210B	family with sequence similarity 210 member B [Source:HGNC Symbol;Acc:HGNC:16102]	20	56358974	56368663	q13.2	1
ENSG00000149218	375.163	-0.260716	0.0698168	-3.73429	0.000188244	0.01024	down	ENDOD1	endonuclease domain containing 1 [Source:HGNC Symbol;Acc:HGNC:29129]	11	95089846	95132645	q21	1
ENSG00000146457	1594.44	0.13902	0.0372877	3.72832	0.00019276	0.0104	up	WTAP	WT1 associated protein [Source:HGNC Symbol;Acc:HGNC:16846]	6	159725585	159756319	q25.3	1
ENSG00000117410	9638.42	0.213129	0.0572526	3.7226	0.000197182	0.01059	up	ATP6V0B	ATPase H+ transporting V0 subunit b [Source:HGNC Symbol;Acc:HGNC:861]	1	43974487	43978295	p34.1	1
ENSG00000121064	4479.97	0.185191	0.049805	3.71831	0.000200558	0.01072	up	SCPEP1	serine carboxypeptidase 1 [Source:HGNC Symbol;Acc:HGNC:29507]	17	56978105	57006768	q22	1
ENSG00000113649	1216.25	-0.166764	0.0449057	-3.71365	0.000204289	0.01079	down	TCERG1	transcription elongation regulator 1 [Source:HGNC Symbol;Acc:HGNC:15630]	5	146447311	146511961	q32	1
ENSG00000115977	2086.99	-0.319878	0.0861175	-3.71444	0.000203656	0.01079	down	AAK1	AP2 associated kinase 1 [Source:HGNC Symbol;Acc:HGNC:19679]	2	69457997	69674349	p13.3	-1
ENSG00000173120	3467.35	-0.127562	0.0343558	-3.71296	0.000204849	0.01079	down	KDM2A	lysine demethylase 2A [Source:HGNC Symbol;Acc:HGNC:13606]	11	67119263	67258082	q13.2	1
ENSG00000099985	78.9311	0.637832	0.171884	3.71084	0.000206574	0.01082	up	OSM	oncostatin M [Source:HGNC Symbol;Acc:HGNC:8506]	22	30262829	30266851	q12.2	-1
ENSG00000068308	1020.54	0.170602	0.0460389	3.70561	0.000210886	0.011	up	OTUD5	OTU deubiquitinase 5 [Source:HGNC Symbol;Acc:HGNC:25402]	X	48922028	48958386	p11.23	-1
ENSG00000107581	10232.9	-0.162622	0.0439425	-3.70079	0.000214933	0.01111	down	EIF3A	eukaryotic translation initiation factor 3 subunit A [Source:HGNC Symbol;Acc:HGNC:3271]	10	119033670	119080823	q26.11	-1
ENSG00000139832	3224.69	0.214639	0.0580003	3.70064	0.000215054	0.01111	up	RAB20	RAB20, member RAS oncogene family [Source:HGNC Symbol;Acc:HGNC:18260]	13	110523066	110561722	q34	-1
ENSG00000134955	13019.1	-0.144776	0.0391377	-3.69916	0.000216316	0.01112	down	SLC37A2	solute carrier family 37 member 2 [Source:HGNC Symbol;Acc:HGNC:20644]	11	125063067	125090312	q24.2	1
ENSG00000068697	3057.38	0.183562	0.0496501	3.6971	0.000218075	0.01115	up	LAPTM4A	lysosomal protein transmembrane 4 alpha [Source:HGNC Symbol;Acc:HGNC:6924]	2	20032650	20051628	p24.1	-1
ENSG00000164124	1054.69	-0.193633	0.0524654	-3.69067	0.000223663	0.01139	down	TMEM144	transmembrane protein 144 [Source:HGNC Symbol;Acc:HGNC:25633]	4	158201604	158255416	q32.1	1
ENSG00000104419	3507.18	0.191244	0.0519324	3.68257	0.000230899	0.01164	up	NDRG1	N-myc downstream regulated 1 [Source:HGNC Symbol;Acc:HGNC:7679]	8	133237171	133302022	q24.22	-1
ENSG00000185262	378.778	0.315591	0.0856754	3.68357	0.000229991	0.01164	up	UBALD2	UBA like domain containing 2 [Source:HGNC Symbol;Acc:HGNC:28438]	17	76265348	76271298	q25.1	1
ENSG00000213859	214.683	0.316616	0.0860325	3.68019	0.000233057	0.0117	up	KCTD11	potassium channel tetramerization domain containing 11 [Source:HGNC Symbol;Acc:HGNC:21302]	17	7351889	7354944	p13.1	1
ENSG00000164405	1306.41	0.264646	0.0719384	3.67879	0.000234344	0.01171	up	UQCRQ	ubiquinol-cytochrome c reductase complex III subunit VII [Source:HGNC Symbol;Acc:HGNC:29594]	5	132866630	132868847	q31.1	1
ENSG00000223949	2483.59	-0.241672	0.0657664	-3.67471	0.000238119	0.01184	down	ROR1-AS1	ROR1 antisense RNA 1 [Source:HGNC Symbol;Acc:HGNC:40508]	1	64094442	64171297	p31.3	-1
ENSG00000140365	995.859	0.247658	0.0674746	3.67039	0.000242177	0.01193	up	COMMD4	COMM domain containing 4 [Source:HGNC Symbol;Acc:HGNC:26027]	15	75336020	75343224	q24.2	1
ENSG00000164048	2482.75	-0.144165	0.0392692	-3.67121	0.000241404	0.01193	down	ZNF589	zinc finger protein 589 [Source:HGNC Symbol;Acc:HGNC:16747]	3	48241100	48299253	p21.31	1
ENSG00000130939	2186.63	-0.15518	0.0424055	-3.65943	0.000252773	0.0124	down	UBE4B	ubiquitination factor E4B [Source:HGNC Symbol;Acc:HGNC:12500]	1	10032832	10181239	p36.22	1
ENSG00000067900	6204.12	-0.218524	0.0598808	-3.64931	0.000262944	0.01277	down	ROCK1	Rho associated coiled-coil containing protein kinase 1 [Source:HGNC Symbol;Acc:HGNC:10251]	18	20946906	21111813	q11.1	-1
ENSG00000089220	4886.93	0.161732	0.0443291	3.64844	0.000263838	0.01277	up	PEBP1	phosphatidylethanolamine binding protein 1 [Source:HGNC Symbol;Acc:HGNC:8630]	12	118136124	118145584	q24.23	1
ENSG00000092330	1561.51	0.137114	0.0375613	3.6504	0.000261835	0.01277	up	TINF2	TERF1 interacting nuclear factor 2 [Source:HGNC Symbol;Acc:HGNC:11824]	14	24239643	24242674	q12	-1
ENSG00000030066	2016.86	-0.154569	0.0424005	-3.64545	0.000266924	0.0128	down	NUP160	nucleoporin 160 [Source:HGNC Symbol;Acc:HGNC:18017]	11	47778087	47848555	p11.2	-1
ENSG00000060971	3471.93	0.19127	0.0524689	3.6454	0.000266976	0.0128	up	ACAA1	acetyl-CoA acyltransferase 1 [Source:HGNC Symbol;Acc:HGNC:82]	3	38103129	38137242	p22.2	-1
ENSG00000261040	352.229	0.414683	0.113793	3.64418	0.00026825	0.01281	up	WFDC21P	WAP four-disulfide core domain 21, pseudogene [Source:HGNC Symbol;Acc:HGNC:50357]	17	60083566	60091885	q23.1	-1
ENSG00000184575	2385.86	-0.144803	0.0397569	-3.6422	0.000270314	0.01285	down	XPOT	exportin for tRNA [Source:HGNC Symbol;Acc:HGNC:12826]	12	64404392	64451125	q14.2	1
ENSG00000055732	1941.61	-0.169632	0.0466222	-3.63845	0.000274286	0.01292	down	MCOLN3	mucolipin 3 [Source:HGNC Symbol;Acc:HGNC:13358]	1	85018082	85048500	p22.3	-1
ENSG00000118777	1248.21	-0.184451	0.0506851	-3.63915	0.000273539	0.01292	down	ABCG2	ATP binding cassette subfamily G member 2 (Junior blood group) [Source:HGNC Symbol;Acc:HGNC:74]	4	88090150	88231628	q22.1	-1
ENSG00000111300	943.427	-0.209204	0.0575416	-3.6357	0.000277222	0.013	down	NAA25	N(alpha)-acetyltransferase 25, NatB auxiliary subunit [Source:HGNC Symbol;Acc:HGNC:25783]	12	112026689	112108796	q24.13	-1
ENSG00000120129	769.733	0.309793	0.0853875	3.62809	0.000285529	0.01333	up	DUSP1	dual specificity phosphatase 1 [Source:HGNC Symbol;Acc:HGNC:3064]	5	172768096	172771195	q35.1	-1
ENSG00000169908	318.893	0.289586	0.0798606	3.62614	0.000287692	0.01338	up	TM4SF1	transmembrane 4 L six family member 1 [Source:HGNC Symbol;Acc:HGNC:11853]	3	149369022	149377692	q25.1	-1
ENSG00000001084	8197.38	-0.15865	0.0438919	-3.61456	0.000300856	0.01391	down	GCLC	glutamate-cysteine ligase catalytic subunit [Source:HGNC Symbol;Acc:HGNC:4311]	6	53497341	53616970	p12.1	-1
ENSG00000054793	1616.42	-0.246791	0.0683298	-3.61176	0.000304126	0.01391	down	ATP9A	ATPase phospholipid transporting 9A (putative) [Source:HGNC Symbol;Acc:HGNC:13540]	20	51596514	51768390	q13.2	-1
ENSG00000127337	262.601	0.318211	0.0881097	3.61154	0.000304388	0.01391	up	YEATS4	YEATS domain containing 4 [Source:HGNC Symbol;Acc:HGNC:24859]	12	69359710	69390870	q15	1
ENSG00000139116	325.69	-0.270528	0.0748658	-3.61351	0.000302077	0.01391	down	KIF21A	kinesin family member 21A [Source:HGNC Symbol;Acc:HGNC:19349]	12	39293228	39443390	q12	-1
ENSG00000079691	406.212	-0.315951	0.0875921	-3.60707	0.000309669	0.01406	down	CARMIL1	capping protein regulator and myosin 1 linker 1 [Source:HGNC Symbol;Acc:HGNC:21581]	6	25279078	25620530	p22.2	1
ENSG00000104312	1641.29	0.16242	0.0450424	3.60594	0.000311023	0.01406	up	RIPK2	receptor interacting serine/threonine kinase 2 [Source:HGNC Symbol;Acc:HGNC:10020]	8	89757806	89791064	q21.3	1
ENSG00000125995	391.467	0.395457	0.10968	3.60554	0.000311499	0.01406	up	ROMO1	reactive oxygen species modulator 1 [Source:HGNC Symbol;Acc:HGNC:16185]	20	35699272	35700984	q11.22	1
ENSG00000111371	263.024	-0.344023	0.0954634	-3.60372	0.000313698	0.0141	down	SLC38A1	solute carrier family 38 member 1 [Source:HGNC Symbol;Acc:HGNC:13447]	12	46183063	46270017	q13.11	-1
ENSG00000112511	349.815	0.31228	0.0868194	3.59689	0.000322038	0.01441	up	PHF1	PHD finger protein 1 [Source:HGNC Symbol;Acc:HGNC:8919]	6	33410399	33416453	p21.32	1
ENSG00000113732	7814.91	0.175675	0.0488687	3.59483	0.000324604	0.01443	up	ATP6V0E1	ATPase H+ transporting V0 subunit e1 [Source:HGNC Symbol;Acc:HGNC:863]	5	172983771	173035445	q35.1	1
ENSG00000121966	594.128	0.248405	0.0691254	3.59354	0.00032622	0.01443	up	CXCR4	C-X-C motif chemokine receptor 4 [Source:HGNC Symbol;Acc:HGNC:2561]	2	136114349	136118165	q22.1	-1
ENSG00000232258	531.998	0.333705	0.0928667	3.59338	0.00032642	0.01443	up	TMEM114	transmembrane protein 114 [Source:HGNC Symbol;Acc:HGNC:33227]	16	8537605	8590193	p13.2	-1
ENSG00000042493	47492.4	0.193933	0.0540353	3.58901	0.000331941	0.01445	up	CAPG	capping actin protein, gelsolin like [Source:HGNC Symbol;Acc:HGNC:1474]	2	85394753	85418432	p11.2	-1
ENSG00000134318	1105.1	-0.241079	0.0671977	-3.58761	0.000333723	0.01445	down	ROCK2	Rho associated coiled-coil containing protein kinase 2 [Source:HGNC Symbol;Acc:HGNC:10252]	2	11179759	11348330	p25.1	-1
ENSG00000137124	400.626	-0.260767	0.0726761	-3.58807	0.000333133	0.01445	down	ALDH1B1	aldehyde dehydrogenase 1 family member B1 [Source:HGNC Symbol;Acc:HGNC:407]	9	38392702	38398661	p13.1	1
ENSG00000173141	642.208	0.294536	0.0820137	3.59131	0.000329025	0.01445	up	MRPL57	mitochondrial ribosomal protein L57 [Source:HGNC Symbol;Acc:HGNC:14514]	13	21176658	21179084	q12.11	1
ENSG00000178449	677.574	0.296519	0.0825958	3.59	0.000330676	0.01445	up	COX14	cytochrome c oxidase assembly factor COX14 [Source:HGNC Symbol;Acc:HGNC:28216]	12	50112082	50120457	q13.12	1
ENSG00000114867	18413.7	-0.186418	0.052023	-3.58339	0.00033917	0.01451	down	EIF4G1	eukaryotic translation initiation factor 4 gamma 1 [Source:HGNC Symbol;Acc:HGNC:3296]	3	184314495	184335358	q27.1	1
ENSG00000127124	1704.28	-0.362782	0.101224	-3.58397	0.000338414	0.01451	down	HIVEP3	human immunodeficiency virus type I enhancer binding protein 3 [Source:HGNC Symbol;Acc:HGNC:13561]	1	41506365	42035925	p34.2	-1
ENSG00000128309	382.215	0.379013	0.105714	3.58525	0.000336749	0.01451	up	MPST	mercaptopyruvate sulfurtransferase [Source:HGNC Symbol;Acc:HGNC:7223]	22	37019635	37029822	q12.3	1
ENSG00000198625	477.918	-0.355653	0.0994314	-3.57687	0.000347739	0.01482	down	MDM4	MDM4 regulator of p53 [Source:HGNC Symbol;Acc:HGNC:6974]	1	204516379	204558120	q32.1	1
ENSG00000114626	705.317	0.214097	0.0599304	3.57243	0.000353685	0.015	up	ABTB1	ankyrin repeat and BTB domain containing 1 [Source:HGNC Symbol;Acc:HGNC:18275]	3	127672935	127680926	q21.3	1
ENSG00000131507	2450.23	0.178268	0.0499214	3.57098	0.000355651	0.015	up	NDFIP1	Nedd4 family interacting protein 1 [Source:HGNC Symbol;Acc:HGNC:17592]	5	142108779	142154440	q31.3	1
ENSG00000157557	682.323	0.280548	0.0785925	3.56966	0.000357444	0.015	up	ETS2	ETS proto-oncogene 2, transcription factor [Source:HGNC Symbol;Acc:HGNC:3489]	21	38805183	38824955	q22.2	1
ENSG00000163453	244.648	0.516619	0.144716	3.56988	0.000357151	0.015	up	IGFBP7	insulin like growth factor binding protein 7 [Source:HGNC Symbol;Acc:HGNC:5476]	4	57030773	57110385	q12	-1
ENSG00000178719	8054.84	0.181633	0.0509129	3.56752	0.000360374	0.01506	up	GRINA	glutamate ionotropic receptor NMDA type subunit associated protein 1 [Source:HGNC Symbol;Acc:HGNC:4589]	8	143990056	143993415	q24.3	1
ENSG00000103363	4607.23	0.281501	0.0790303	3.56194	0.000368126	0.01533	up	ELOB	elongin B [Source:HGNC Symbol;Acc:HGNC:11619]	16	2771414	2777297	p13.3	-1
ENSG00000095794	458.222	0.244017	0.0686415	3.55496	0.000378044	0.01544	up	CREM	cAMP responsive element modulator [Source:HGNC Symbol;Acc:HGNC:2352]	10	35126791	35212958	p11.21	1
ENSG00000115204	2932.24	0.188658	0.0530933	3.55333	0.000380389	0.01544	up	MPV17	mitochondrial inner membrane protein MPV17 [Source:HGNC Symbol;Acc:HGNC:7224]	2	27309492	27325680	p23.3	-1
ENSG00000125148	2729.28	0.302104	0.0850514	3.55202	0.000382289	0.01544	up	MT2A	metallothionein 2A [Source:HGNC Symbol;Acc:HGNC:7406]	16	56608584	56609497	q13	1
ENSG00000130779	3737.8	-0.152336	0.0428464	-3.55538	0.000377427	0.01544	down	CLIP1	CAP-Gly domain containing linker protein 1 [Source:HGNC Symbol;Acc:HGNC:10461]	12	122271432	122422632	q24.31	-1
ENSG00000131203	323.785	0.444691	0.125125	3.55398	0.000379445	0.01544	up	IDO1	indoleamine 2,3-dioxygenase 1 [Source:HGNC Symbol;Acc:HGNC:6059]	8	39902275	39928790	p11.21	1
ENSG00000137714	6650.88	0.300063	0.0844737	3.55215	0.000382099	0.01544	up	FDX1	ferredoxin 1 [Source:HGNC Symbol;Acc:HGNC:3638]	11	110429948	110464884	q22.3	1
ENSG00000143924	8765.58	-0.156916	0.0441668	-3.55279	0.000381162	0.01544	down	EML4	EMAP like 4 [Source:HGNC Symbol;Acc:HGNC:1316]	2	42169353	42332548	p21	1
ENSG00000164134	1615.11	-0.177869	0.0500244	-3.55565	0.000377045	0.01544	down	NAA15	N(alpha)-acetyltransferase 15, NatA auxiliary subunit [Source:HGNC Symbol;Acc:HGNC:30782]	4	139301505	139420033	q31.1	1
ENSG00000149806	2223.2	0.220091	0.0620634	3.54623	0.000390778	0.01572	up	FAU	FAU ubiquitin like and ribosomal protein S30 fusion [Source:HGNC Symbol;Acc:HGNC:3597]	11	65120630	65122177	q13.1	-1
ENSG00000204257	5595.5	0.170159	0.0480046	3.54463	0.000393161	0.01576	up	HLA-DMA	major histocompatibility complex, class II, DM alpha [Source:HGNC Symbol;Acc:HGNC:4934]	6	32948613	32969094	p21.32	-1
ENSG00000274736	132.235	0.495516	0.139904	3.54182	0.000397374	0.01587	up	CCL23	C-C motif chemokine ligand 23 [Source:HGNC Symbol;Acc:HGNC:10622]	17	36013056	36017972	q12	-1
ENSG00000012779	1124.1	-0.234608	0.0666496	-3.52002	0.000431509	0.01616	down	ALOX5	arachidonate 5-lipoxygenase [Source:HGNC Symbol;Acc:HGNC:435]	10	45374176	45446119	q11.21	1
ENSG00000031003	3699.37	-0.173822	0.0493226	-3.52418	0.000424795	0.01616	down	FAM13B	family with sequence similarity 13 member B [Source:HGNC Symbol;Acc:HGNC:1335]	5	137937960	138051961	q31.2	-1
ENSG00000065060	2778.34	-0.198327	0.0561487	-3.53217	0.000412167	0.01616	down	UHRF1BP1	UHRF1 binding protein 1 [Source:HGNC Symbol;Acc:HGNC:21216]	6	34792015	34883138	p21.31	1
ENSG00000070814	666.886	-0.196546	0.0557634	-3.52465	0.000424048	0.01616	down	TCOF1	treacle ribosome biogenesis factor 1 [Source:HGNC Symbol;Acc:HGNC:11654]	5	150357629	150400308	q32	1
ENSG00000084070	1650.57	0.160565	0.0456169	3.51985	0.000431785	0.01616	up	SMAP2	small ArfGAP2 [Source:HGNC Symbol;Acc:HGNC:25082]	1	40344850	40423326	p34.2	1
ENSG00000113615	1752.02	-0.20254	0.0574908	-3.52299	0.000426703	0.01616	down	SEC24A	SEC24 homolog A, COPII coat complex component [Source:HGNC Symbol;Acc:HGNC:10703]	5	134648785	134727909	q31.1	1
ENSG00000116574	567.067	0.200656	0.0567873	3.53346	0.00041016	0.01616	up	RHOU	ras homolog family member U [Source:HGNC Symbol;Acc:HGNC:17794]	1	228735479	228746664	q42.13	1
ENSG00000117305	2030.04	0.18843	0.0534208	3.52727	0.000419865	0.01616	up	HMGCL	3-hydroxy-3-methylglutaryl-CoA lyase [Source:HGNC Symbol;Acc:HGNC:5005]	1	23801885	23838620	p36.11	-1
ENSG00000118971	2614.22	-0.264691	0.0751455	-3.52238	0.000427697	0.01616	down	CCND2	cyclin D2 [Source:HGNC Symbol;Acc:HGNC:1583]	12	4273762	4305353	p13.32	1
ENSG00000120694	5431.79	-0.135453	0.038443	-3.52348	0.000425927	0.01616	down	HSPH1	heat shock protein family H (Hsp110) member 1 [Source:HGNC Symbol;Acc:HGNC:16969]	13	31134973	31162388	q12.3	-1
ENSG00000130766	992.386	0.196652	0.0557699	3.52613	0.000421687	0.01616	up	SESN2	sestrin 2 [Source:HGNC Symbol;Acc:HGNC:20746]	1	28259518	28282491	p35.3	1
ENSG00000137509	4157.02	0.128399	0.0364594	3.52171	0.000428768	0.01616	up	PRCP	prolylcarboxypeptidase [Source:HGNC Symbol;Acc:HGNC:9344]	11	82822936	82970584	q14.1	-1
ENSG00000139514	2123.21	-0.206439	0.058599	-3.52292	0.000426822	0.01616	down	SLC7A1	solute carrier family 7 member 1 [Source:HGNC Symbol;Acc:HGNC:11057]	13	29509414	29595688	q12.3	-1
ENSG00000158457	1661.2	0.172909	0.0489569	3.53188	0.000412624	0.01616	up	TSPAN33	tetraspanin 33 [Source:HGNC Symbol;Acc:HGNC:28743]	7	129144707	129169699	q32.1	1
ENSG00000161921	7377.55	0.126776	0.0360071	3.52087	0.000430138	0.01616	up	CXCL16	C-X-C motif chemokine ligand 16 [Source:HGNC Symbol;Acc:HGNC:16642]	17	4733533	4739928	p13.2	-1
ENSG00000166266	1043.57	-0.178101	0.0504752	-3.52849	0.00041794	0.01616	down	CUL5	cullin 5 [Source:HGNC Symbol;Acc:HGNC:2556]	11	108008898	108107761	q22.3	1
ENSG00000169508	228.05	0.503873	0.143146	3.51999	0.000431565	0.01616	up	GPR183	G protein-coupled receptor 183 [Source:HGNC Symbol;Acc:HGNC:3128]	13	99294539	99307399	q32.3	-1
ENSG00000221869	133.154	1.18493	0.336497	3.52136	0.000429332	0.01616	up	CEBPD	CCAAT enhancer binding protein delta [Source:HGNC Symbol;Acc:HGNC:1835]	8	47736913	47738164	q11.21	-1
ENSG00000162729	486.066	0.248934	0.0707587	3.51807	0.000434703	0.01621	up	IGSF8	immunoglobulin superfamily member 8 [Source:HGNC Symbol;Acc:HGNC:17813]	1	160091340	160098943	q23.2	-1
ENSG00000122484	462.409	-0.236483	0.0672808	-3.51486	0.000439989	0.01631	down	RPAP2	RNA polymerase II associated protein 2 [Source:HGNC Symbol;Acc:HGNC:25791]	1	92299059	92402056	p22.1	1
ENSG00000133706	2503.26	-0.139273	0.0396309	-3.51426	0.000440982	0.01631	down	LARS	leucyl-tRNA synthetase [Source:HGNC Symbol;Acc:HGNC:6512]	5	146113034	146182650	q32	-1
ENSG00000197024	456.024	-0.234845	0.0668373	-3.51368	0.000441945	0.01631	down	ZNF398	zinc finger protein 398 [Source:HGNC Symbol;Acc:HGNC:18373]	7	149126416	149183042	q36.1	1
ENSG00000116209	4305.31	0.169907	0.0484059	3.51006	0.000448012	0.01642	up	TMEM59	transmembrane protein 59 [Source:HGNC Symbol;Acc:HGNC:1239]	1	54026681	54053504	p32.3	-1
ENSG00000136827	1069.09	0.152304	0.043392	3.50996	0.000448166	0.01642	up	TOR1A	torsin family 1 member A [Source:HGNC Symbol;Acc:HGNC:3098]	9	129812942	129824244	q34.11	-1
ENSG00000160352	435.208	-0.290252	0.0827097	-3.50929	0.000449309	0.01642	down	ZNF714	zinc finger protein 714 [Source:HGNC Symbol;Acc:HGNC:27124]	19	21082159	21125270	p12	1
ENSG00000112137	580.617	-0.258903	0.0738687	-3.50491	0.000456764	0.01663	down	PHACTR1	phosphatase and actin regulator 1 [Source:HGNC Symbol;Acc:HGNC:20990]	6	12716805	13290484	p24.1	1
ENSG00000135018	4325.51	-0.111394	0.0318012	-3.50284	0.000460329	0.01668	down	UBQLN1	ubiquilin 1 [Source:HGNC Symbol;Acc:HGNC:12508]	9	83659968	83707958	q21.32	-1
ENSG00000136731	4062.53	-0.194558	0.0555522	-3.50226	0.000461326	0.01668	down	UGGT1	UDP-glucose glycoprotein glucosyltransferase 1 [Source:HGNC Symbol;Acc:HGNC:15663]	2	128091200	128195677	q14.3	1
ENSG00000035141	960.686	-0.159939	0.0456811	-3.5012	0.000463168	0.01669	down	FAM136A	family with sequence similarity 136 member A [Source:HGNC Symbol;Acc:HGNC:25911]	2	70295975	70302090	p13.3	-1
ENSG00000128595	7686.34	-0.126765	0.0362469	-3.49726	0.000470061	0.01689	down	CALU	calumenin [Source:HGNC Symbol;Acc:HGNC:1458]	7	128739292	128773400	q32.1	1
ENSG00000162076	324.82	0.328056	0.0938474	3.49563	0.000472939	0.01693	up	FLYWCH2	FLYWCH family member 2 [Source:HGNC Symbol;Acc:HGNC:25178]	16	2883213	2899382	p13.3	1
ENSG00000143546	242.758	0.442981	0.126926	3.49007	0.000482892	0.01723	up	S100A8	S100 calcium binding protein A8 [Source:HGNC Symbol;Acc:HGNC:10498]	1	153390032	153391073	q21.3	-1
ENSG00000176845	1115.27	0.299343	0.0858016	3.48878	0.000485229	0.01726	up	METRNL	meteorin like, glial cell differentiation regulator [Source:HGNC Symbol;Acc:HGNC:27584]	17	83079609	83095122	q25.3	1
ENSG00000099860	331.382	0.300266	0.0861194	3.48662	0.000489158	0.01728	up	GADD45B	growth arrest and DNA damage inducible beta [Source:HGNC Symbol;Acc:HGNC:4096]	19	2476122	2478259	p13.3	1
ENSG00000162377	861.513	-0.167012	0.0478927	-3.48721	0.000488081	0.01728	down	COA7	cytochrome c oxidase assembly factor 7 (putative) [Source:HGNC Symbol;Acc:HGNC:25716]	1	52684449	52698347	p32.3	-1
ENSG00000132912	2033.07	-0.129363	0.0371183	-3.48515	0.000491861	0.01732	down	DCTN4	dynactin subunit 4 [Source:HGNC Symbol;Acc:HGNC:15518]	5	150708440	150759109	q33.1	-1
ENSG00000140264	7603.56	0.250463	0.0719444	3.48134	0.000498912	0.01751	up	SERF2	small EDRK-rich factor 2 [Source:HGNC Symbol;Acc:HGNC:10757]	15	43777087	43802589	q15.3	1
ENSG00000162783	1397.09	0.318013	0.0913765	3.48025	0.000500949	0.01751	up	IER5	immediate early response 5 [Source:HGNC Symbol;Acc:HGNC:5393]	1	181088700	181092900	q25.3	1
ENSG00000198894	1367.41	-0.17133	0.0492389	-3.47958	0.000502204	0.01751	down	CIPC	CLOCK interacting pacemaker [Source:HGNC Symbol;Acc:HGNC:20365]	14	77098126	77117287	q24.3	1
ENSG00000109736	1528.87	0.22207	0.0639877	3.47051	0.000519467	0.01805	up	MFSD10	major facilitator superfamily domain containing 10 [Source:HGNC Symbol;Acc:HGNC:16894]	4	2930561	2934834	p16.3	-1
ENSG00000133639	725.23	0.268354	0.0773396	3.46981	0.000520824	0.01805	up	BTG1	BTG anti-proliferation factor 1 [Source:HGNC Symbol;Acc:HGNC:1130]	12	92140278	92145846	q21.33	-1
ENSG00000163154	962.288	0.217504	0.0628068	3.46307	0.000534051	0.01844	up	TNFAIP8L2	TNF alpha induced protein 8 like 2 [Source:HGNC Symbol;Acc:HGNC:26277]	1	151156649	151159749	q21.3	1
ENSG00000083642	537.03	-0.258487	0.0748121	-3.45515	0.000549996	0.01852	down	PDS5B	PDS5 cohesin associated factor B [Source:HGNC Symbol;Acc:HGNC:20418]	13	32586452	32778019	q13.1	1
ENSG00000100580	919.305	-0.231101	0.0667939	-3.45991	0.000540362	0.01852	down	TMED8	transmembrane p24 trafficking protein family member 8 [Source:HGNC Symbol;Acc:HGNC:18633]	14	77335029	77377094	q24.3	-1
ENSG00000109971	63990.2	-0.136144	0.0393909	-3.45622	0.000547803	0.01852	down	HSPA8	heat shock protein family A (Hsp70) member 8 [Source:HGNC Symbol;Acc:HGNC:5241]	11	123057489	123063230	q24.1	-1
ENSG00000131626	1946.16	-0.118006	0.0341291	-3.45765	0.000544909	0.01852	down	PPFIA1	PTPRF interacting protein alpha 1 [Source:HGNC Symbol;Acc:HGNC:9245]	11	70270700	70385312	q13.3	1
ENSG00000134470	182.801	0.331195	0.0957356	3.45947	0.000541232	0.01852	up	IL15RA	interleukin 15 receptor subunit alpha [Source:HGNC Symbol;Acc:HGNC:5978]	10	5943639	5978187	p15.1	-1
ENSG00000188186	1182.74	0.249445	0.0721258	3.45847	0.000543256	0.01852	up	LAMTOR4	late endosomal/lysosomal adaptor, MAPK and MTOR activator 4 [Source:HGNC Symbol;Acc:HGNC:33772]	7	100148907	100155944	q22.1	1
ENSG00000198231	3065.99	-0.108081	0.03125	-3.45861	0.000542978	0.01852	down	DDX42	DEAD-box helicase 42 [Source:HGNC Symbol;Acc:HGNC:18676]	17	63773603	63819317	q23.3	1
ENSG00000198363	3792.37	-0.130491	0.0377668	-3.45518	0.00054992	0.01852	down	ASPH	aspartate beta-hydroxylase [Source:HGNC Symbol;Acc:HGNC:757]	8	61500556	61714640	q12.3	-1
ENSG00000174780	3398.84	-0.134612	0.0389812	-3.45326	0.000553847	0.01859	down	SRP72	signal recognition particle 72 [Source:HGNC Symbol;Acc:HGNC:11303]	4	56467617	56503681	q12	1
ENSG00000095637	448.152	-0.216695	0.062797	-3.45072	0.000559085	0.01871	down	SORBS1	sorbin and SH3 domain containing 1 [Source:HGNC Symbol;Acc:HGNC:14565]	10	95311771	95561414	q24.1	-1
ENSG00000134851	2335.78	0.17993	0.0521616	3.44948	0.000561663	0.01874	up	TMEM165	transmembrane protein 165 [Source:HGNC Symbol;Acc:HGNC:30760]	4	55395957	55453397	q12	1
ENSG00000083290	842.119	0.185935	0.0539671	3.44534	0.000570337	0.01897	up	ULK2	unc-51 like autophagy activating kinase 2 [Source:HGNC Symbol;Acc:HGNC:13480]	17	19770829	19867936	p11.2	-1
ENSG00000205220	596.648	0.224387	0.06518	3.44258	0.000576204	0.0191	up	PSMB10	proteasome subunit beta 10 [Source:HGNC Symbol;Acc:HGNC:9538]	16	67934506	67936864	q22.1	-1
ENSG00000125124	1006.25	0.147181	0.0427957	3.43915	0.000583536	0.01911	up	BBS2	Bardet-Biedl syndrome 2 [Source:HGNC Symbol;Acc:HGNC:967]	16	56466836	56520087	q13	-1
ENSG00000163870	1683.34	0.211965	0.0615956	3.44123	0.000579076	0.01911	up	TPRA1	transmembrane protein adipocyte associated 1 [Source:HGNC Symbol;Acc:HGNC:30413]	3	127571232	127598267	q21.3	-1
ENSG00000179950	2435.33	0.154517	0.0449219	3.43968	0.000582405	0.01911	up	PUF60	poly(U) binding splicing factor 60 [Source:HGNC Symbol;Acc:HGNC:17042]	8	143816344	143829352	q24.3	-1
ENSG00000187164	4534.17	-0.159287	0.0463007	-3.44028	0.000581118	0.01911	down	SHTN1	shootin 1 [Source:HGNC Symbol;Acc:HGNC:29319]	10	116881477	117126586	q25.3	-1
ENSG00000146425	915.77	0.220385	0.0641441	3.43577	0.000590868	0.01928	up	DYNLT1	dynein light chain Tctex-type 1 [Source:HGNC Symbol;Acc:HGNC:11697]	6	158636474	158644743	q25.3	-1
ENSG00000161677	295.613	0.508888	0.148145	3.43507	0.000592394	0.01928	up	JOSD2	Josephin domain containing 2 [Source:HGNC Symbol;Acc:HGNC:28853]	19	50505998	50511353	q13.33	-1
ENSG00000078177	680.361	-0.232606	0.06779	-3.43126	0.000600777	0.0195	down	N4BP2	NEDD4 binding protein 2 [Source:HGNC Symbol;Acc:HGNC:29851]	4	40056850	40158252	p14	1
ENSG00000117862	1644.14	0.152865	0.0445978	3.42763	0.000608874	0.0197	up	TXNDC12	thioredoxin domain containing 12 [Source:HGNC Symbol;Acc:HGNC:24626]	1	52020131	52056171	p32.3	-1
ENSG00000178057	1074.65	0.330739	0.0965956	3.42395	0.000617171	0.01991	up	NDUFAF3	NADH:ubiquinone oxidoreductase complex assembly factor 3 [Source:HGNC Symbol;Acc:HGNC:29918]	3	49020459	49023495	p21.31	1
ENSG00000160310	1503.46	0.149368	0.0437058	3.41758	0.000631816	0.02032	up	PRMT2	protein arginine methyltransferase 2 [Source:HGNC Symbol;Acc:HGNC:5186]	21	46635595	46665124	q22.3	1
ENSG00000011600	14430.5	0.228943	0.0670085	3.41663	0.000634019	0.02033	up	TYROBP	TYRO protein tyrosine kinase binding protein [Source:HGNC Symbol;Acc:HGNC:12449]	19	35904401	35908295	q13.12	-1
ENSG00000163811	1446.91	-0.168138	0.0492293	-3.41541	0.000636864	0.02036	down	WDR43	WD repeat domain 43 [Source:HGNC Symbol;Acc:HGNC:28945]	2	28894667	28948219	p23.2	1
ENSG00000170175	97.7787	0.432136	0.126586	3.41378	0.00064069	0.02042	up	CHRNB1	cholinergic receptor nicotinic beta 1 subunit [Source:HGNC Symbol;Acc:HGNC:1961]	17	7445061	7457710	p13.1	1
ENSG00000130165	814.865	0.203952	0.0598713	3.4065	0.000658004	0.02082	up	ELOF1	elongation factor 1 homolog [Source:HGNC Symbol;Acc:HGNC:28691]	19	11551147	11559236	p13.2	-1
ENSG00000139132	3122.8	-0.195866	0.0575023	-3.40623	0.00065866	0.02082	down	FGD4	FYVE, RhoGEF and PH domain containing 4 [Source:HGNC Symbol;Acc:HGNC:19125]	12	32399529	32646050	p11.21	1
ENSG00000166411	1010.47	-0.19159	0.0562492	-3.4061	0.000658971	0.02082	down	IDH3A	isocitrate dehydrogenase (NAD(+)) 3 alpha [Source:HGNC Symbol;Acc:HGNC:5384]	15	78131498	78171945	q25.1	1
ENSG00000169738	1003.74	0.344896	0.101342	3.40329	0.000665788	0.02097	up	DCXR	dicarbonyl and L-xylulose reductase [Source:HGNC Symbol;Acc:HGNC:18985]	17	82035136	82037709	q25.3	-1
ENSG00000068305	3620.47	-0.175665	0.0516348	-3.40207	0.000668781	0.021	down	MEF2A	myocyte enhancer factor 2A [Source:HGNC Symbol;Acc:HGNC:6993]	15	99565417	99716466	q26.3	1
ENSG00000151552	801.315	0.193736	0.0569887	3.39955	0.000674974	0.02108	up	QDPR	quinoid dihydropteridine reductase [Source:HGNC Symbol;Acc:HGNC:9752]	4	17460261	17512206	p15.32	-1
ENSG00000171714	1010.34	-0.30153	0.0886932	-3.39969	0.000674621	0.02108	down	ANO5	anoctamin 5 [Source:HGNC Symbol;Acc:HGNC:27337]	11	21799934	22283357	p15.1	1
ENSG00000126062	780.412	0.221722	0.0652692	3.39703	0.000681213	0.02121	up	TMEM115	transmembrane protein 115 [Source:HGNC Symbol;Acc:HGNC:30055]	3	50354750	50359521	p21.31	-1
ENSG00000175066	556.462	-0.210167	0.0618857	-3.39605	0.00068367	0.02122	down	GK5	glycerol kinase 5 [Source:HGNC Symbol;Acc:HGNC:28635]	3	142157527	142225592	q23	-1
ENSG00000100300	7007.22	0.418691	0.123419	3.39244	0.000692726	0.02126	up	TSPO	translocator protein [Source:HGNC Symbol;Acc:HGNC:1158]	22	43151547	43163242	q13.2	1
ENSG00000168306	216.755	-0.403134	0.11878	-3.39397	0.000688873	0.02126	down	ACOX2	acyl-CoA oxidase 2 [Source:HGNC Symbol;Acc:HGNC:120]	3	58505136	58537283	p14.3	-1
ENSG00000170891	502.537	0.255409	0.075238	3.39468	0.000687078	0.02126	up	CYTL1	cytokine like 1 [Source:HGNC Symbol;Acc:HGNC:24435]	4	5014586	5019458	p16.2	-1
ENSG00000175938	190.867	0.566318	0.16693	3.39256	0.000692433	0.02126	up	ORAI3	ORAI calcium release-activated calcium modulator 3 [Source:HGNC Symbol;Acc:HGNC:28185]	16	30949068	30956461	p11.2	1
ENSG00000155158	5498.74	-0.168575	0.0497422	-3.38898	0.000701542	0.02141	down	TTC39B	tetratricopeptide repeat domain 39B [Source:HGNC Symbol;Acc:HGNC:23704]	9	15163622	15307360	p22.3	-1
ENSG00000158470	2865.22	0.120494	0.0355622	3.38826	0.000703388	0.02141	up	B4GALT5	beta-1,4-galactosyltransferase 5 [Source:HGNC Symbol;Acc:HGNC:928]	20	49632945	49713878	q13.13	-1
ENSG00000175756	1213.16	0.340658	0.100543	3.38817	0.000703595	0.02141	up	AURKAIP1	aurora kinase A interacting protein 1 [Source:HGNC Symbol;Acc:HGNC:24114]	1	1373730	1375495	p36.33	-1
ENSG00000103275	1506.35	0.209462	0.0618365	3.38735	0.000705721	0.02141	up	UBE2I	ubiquitin conjugating enzyme E2 I [Source:HGNC Symbol;Acc:HGNC:12485]	16	1308880	1327018	p13.3	1
ENSG00000056097	2679.55	-0.15659	0.0462511	-3.38564	0.000710116	0.02149	down	ZFR	zinc finger RNA binding protein [Source:HGNC Symbol;Acc:HGNC:17277]	5	32354350	32444740	p13.3	-1
ENSG00000269981	107.528	-0.616601	0.18244	-3.37974	0.000725544	0.02189	down		novel pseudogene	1	137682	137965	p36.33	-1
ENSG00000148773	2037.05	-0.315017	0.0933214	-3.37561	0.000736528	0.02216	down	MKI67	marker of proliferation Ki-67 [Source:HGNC Symbol;Acc:HGNC:7107]	10	128096659	128126423	q26.2	-1
ENSG00000123700	206.865	-0.425113	0.126108	-3.37101	0.000748919	0.02247	down	KCNJ2	potassium voltage-gated channel subfamily J member 2 [Source:HGNC Symbol;Acc:HGNC:6263]	17	70168673	70180048	q24.3	1
ENSG00000061987	1333.08	-0.14414	0.0427696	-3.37014	0.000751293	0.02248	down	MON2	MON2 homolog, regulator of endosome-to-Golgi trafficking [Source:HGNC Symbol;Acc:HGNC:29177]	12	62466817	62600476	q14.1	1
ENSG00000078269	425.734	-0.235387	0.0698939	-3.36778	0.000757765	0.02261	down	SYNJ2	synaptojanin 2 [Source:HGNC Symbol;Acc:HGNC:11504]	6	157981863	158099176	q25.3	1
ENSG00000165733	1461.84	-0.154266	0.0458336	-3.36578	0.000763268	0.02271	down	BMS1	BMS1 ribosome biogenesis factor [Source:HGNC Symbol;Acc:HGNC:23505]	10	42782795	42834937	q11.21	1
ENSG00000163714	1654.36	-0.132712	0.0394551	-3.36361	0.000769314	0.02283	down	U2SURP	U2 snRNP associated SURP domain containing [Source:HGNC Symbol;Acc:HGNC:30855]	3	142964497	143060725	q23	1
ENSG00000124226	1889.76	0.112901	0.0335868	3.36146	0.000775304	0.02294	up	RNF114	ring finger protein 114 [Source:HGNC Symbol;Acc:HGNC:13094]	20	49936336	49953885	q13.13	1
ENSG00000136732	559.838	0.309441	0.0920978	3.35991	0.000779666	0.02301	up	GYPC	glycophorin C (Gerbich blood group) [Source:HGNC Symbol;Acc:HGNC:4704]	2	126656133	126696667	q14.3	1
ENSG00000076864	2306.79	-0.140072	0.0417058	-3.35858	0.000783445	0.02305	down	RAP1GAP	RAP1 GTPase activating protein [Source:HGNC Symbol;Acc:HGNC:9858]	1	21596215	21669363	p36.12	-1
ENSG00000055950	743.898	0.235655	0.0701853	3.35761	0.000786194	0.02307	up	MRPL43	mitochondrial ribosomal protein L43 [Source:HGNC Symbol;Acc:HGNC:14517]	10	100969458	100987515	q24.31	-1
ENSG00000169045	7176.2	-0.168884	0.0503481	-3.35433	0.000795582	0.02328	down	HNRNPH1	heterogeneous nuclear ribonucleoprotein H1 [Source:HGNC Symbol;Acc:HGNC:5041]	5	179614178	179634784	q35.3	-1
ENSG00000105875	1135.56	0.164261	0.048984	3.35335	0.000798393	0.02329	up	WDR91	WD repeat domain 91 [Source:HGNC Symbol;Acc:HGNC:24997]	7	135183839	135211534	q33	-1
ENSG00000186088	1245.58	0.146535	0.0437058	3.35276	0.000800087	0.02329	up	GSAP	gamma-secretase activating protein [Source:HGNC Symbol;Acc:HGNC:28042]	7	77310751	77416349	q11.23	-1
ENSG00000110075	2140.38	-0.140249	0.041867	-3.34988	0.000808466	0.02347	down	PPP6R3	protein phosphatase 6 regulatory subunit 3 [Source:HGNC Symbol;Acc:HGNC:1173]	11	68460731	68615334	q13.2	1
ENSG00000106348	3182.73	0.155215	0.046358	3.34818	0.000813433	0.02355	up	IMPDH1	inosine monophosphate dehydrogenase 1 [Source:HGNC Symbol;Acc:HGNC:6052]	7	128392277	128410252	q32.1	-1
ENSG00000157193	829.155	-0.186103	0.0556126	-3.34642	0.000818631	0.02364	down	LRP8	LDL receptor related protein 8 [Source:HGNC Symbol;Acc:HGNC:6700]	1	53242364	53328469	p32.3	-1
ENSG00000198018	601.047	-0.20166	0.0602791	-3.34543	0.000821539	0.02366	down	ENTPD7	ectonucleoside triphosphate diphosphohydrolase 7 [Source:HGNC Symbol;Acc:HGNC:19745]	10	99659509	99711241	q24.2	1
ENSG00000110436	1274.95	0.307026	0.0917986	3.34456	0.000824133	0.02367	up	SLC1A2	solute carrier family 1 member 2 [Source:HGNC Symbol;Acc:HGNC:10940]	11	35251205	35420063	p13	-1
ENSG00000253276	546.839	0.32739	0.0979334	3.34299	0.000828806	0.02374	up	CCDC71L	coiled-coil domain containing 71 like [Source:HGNC Symbol;Acc:HGNC:26685]	7	106654360	106661158	q22.3	-1
ENSG00000130066	8842.93	0.188699	0.0564818	3.34088	0.000835136	0.02379	up	SAT1	spermidine/spermine N1-acetyltransferase 1 [Source:HGNC Symbol;Acc:HGNC:10540]	X	23783173	23786226	p22.11	1
ENSG00000170043	1182.6	0.151931	0.045472	3.3412	0.000834164	0.02379	up	TRAPPC1	trafficking protein particle complex 1 [Source:HGNC Symbol;Acc:HGNC:19894]	17	7930345	7932123	p13.1	-1
ENSG00000166923	891.96	-0.307598	0.0921017	-3.33976	0.000838494	0.02382	down	GREM1	gremlin 1, DAN family BMP antagonist [Source:HGNC Symbol;Acc:HGNC:2001]	15	32718004	32745106	q13.3	1
ENSG00000197170	1335.35	-0.163977	0.0491074	-3.33914	0.000840379	0.02382	down	PSMD12	proteasome 26S subunit, non-ATPase 12 [Source:HGNC Symbol;Acc:HGNC:9557]	17	67337916	67366605	q24.2	-1
ENSG00000159348	1551.34	0.143888	0.0431023	3.33828	0.00084299	0.02383	up	CYB5R1	cytochrome b5 reductase 1 [Source:HGNC Symbol;Acc:HGNC:13397]	1	202961873	202967275	q32.1	-1
ENSG00000140650	524.735	-0.204128	0.0611747	-3.33681	0.000847457	0.02389	down	PMM2	phosphomannomutase 2 [Source:HGNC Symbol;Acc:HGNC:9115]	16	8788823	8849325	p13.2	1
ENSG00000166228	1570.31	0.170582	0.0511675	3.33379	0.000856705	0.02403	up	PCBD1	pterin-4 alpha-carbinolamine dehydratase 1 [Source:HGNC Symbol;Acc:HGNC:8646]	10	70882280	70888565	q22.1	-1
ENSG00000186074	2912.51	0.140266	0.0420681	3.33425	0.000855289	0.02403	up	CD300LF	CD300 molecule like family member f [Source:HGNC Symbol;Acc:HGNC:29883]	17	74694311	74712978	q25.1	-1
ENSG00000179085	222.756	0.4205	0.126203	3.33193	0.000862471	0.02412	up	DPM3	dolichyl-phosphate mannosyltransferase subunit 3, regulatory [Source:HGNC Symbol;Acc:HGNC:3007]	1	155139891	155140595	q22	-1
ENSG00000119906	2084.08	-0.173324	0.05207	-3.32868	0.000872586	0.02434	down	SLF2	SMC5-SMC6 complex localization factor 2 [Source:HGNC Symbol;Acc:HGNC:17814]	10	100912963	100965134	q24.31	1
ENSG00000105379	302.947	0.276278	0.0830386	3.3271	0.000877546	0.02439	up	ETFB	electron transfer flavoprotein subunit beta [Source:HGNC Symbol;Acc:HGNC:3482]	19	51345169	51366418	q13.41	-1
ENSG00000214530	151.386	0.328045	0.098609	3.32673	0.000878722	0.02439	up	STARD10	StAR related lipid transfer domain containing 10 [Source:HGNC Symbol;Acc:HGNC:10666]	11	72754729	72793681	q13.4	-1
ENSG00000138777	1929.82	0.163266	0.0491378	3.32262	0.000891763	0.02469	up	PPA2	pyrophosphatase (inorganic) 2 [Source:HGNC Symbol;Acc:HGNC:28883]	4	105369077	105474067	q24	-1
ENSG00000177600	3866.86	0.200858	0.0604887	3.3206	0.000898256	0.0248	up	RPLP2	ribosomal protein lateral stalk subunit P2 [Source:HGNC Symbol;Acc:HGNC:10377]	11	809965	812880	p15.5	1
ENSG00000122965	1675.9	-0.116933	0.0352229	-3.3198	0.000900824	0.02481	down	RBM19	RNA binding motif protein 19 [Source:HGNC Symbol;Acc:HGNC:29098]	12	113816738	113966325	q24.21	-1
ENSG00000111424	2016.24	-0.135555	0.04085	-3.31835	0.000905524	0.02488	down	VDR	vitamin D receptor [Source:HGNC Symbol;Acc:HGNC:12679]	12	47841537	47943048	q13.11	-1
ENSG00000034713	2576.38	0.156795	0.0473439	3.31182	0.0009269	0.02501	up	GABARAPL2	GABA type A receptor associated protein like 2 [Source:HGNC Symbol;Acc:HGNC:13291]	16	75566375	75577881	q23.1	1
ENSG00000083845	3246.96	0.203201	0.0613342	3.31301	0.00092298	0.02501	up	RPS5	ribosomal protein S5 [Source:HGNC Symbol;Acc:HGNC:10426]	19	58386400	58394806	q13.43	1
ENSG00000143162	13892.2	0.240411	0.072586	3.31208	0.000926043	0.02501	up	CREG1	cellular repressor of E1A stimulated genes 1 [Source:HGNC Symbol;Acc:HGNC:2351]	1	167529117	167553805	q24.2	-1
ENSG00000153395	883.142	0.183875	0.0555035	3.31284	0.000923526	0.02501	up	LPCAT1	lysophosphatidylcholine acyltransferase 1 [Source:HGNC Symbol;Acc:HGNC:25718]	5	1456480	1523962	p15.33	-1
ENSG00000168137	1736.87	-0.191756	0.0578739	-3.31335	0.00092185	0.02501	down	SETD5	SET domain containing 5 [Source:HGNC Symbol;Acc:HGNC:25566]	3	9397615	9479240	p25.3	1
ENSG00000169715	552.894	0.346664	0.104549	3.31581	0.000913788	0.02501	up	MT1E	metallothionein 1E [Source:HGNC Symbol;Acc:HGNC:7397]	16	56625475	56627112	q13	1
ENSG00000204272	586.993	0.223101	0.0673202	3.31403	0.000919619	0.02501	up	NBDY	negative regulator of P-body association [Source:HGNC Symbol;Acc:HGNC:50713]	X	56729241	56819179	p11.21	1
ENSG00000155561	1414.02	-0.162674	0.0491985	-3.30648	0.000944765	0.02543	down	NUP205	nucleoporin 205 [Source:HGNC Symbol;Acc:HGNC:18658]	7	135557917	135648757	q33	1
ENSG00000141026	414.939	0.215827	0.0653588	3.30219	0.000959322	0.02575	up	MED9	mediator complex subunit 9 [Source:HGNC Symbol;Acc:HGNC:25487]	17	17476994	17493221	p11.2	1
ENSG00000170468	848.964	0.246337	0.0746258	3.30097	0.000963528	0.02575	up	RIOX1	ribosomal oxygenase 1 [Source:HGNC Symbol;Acc:HGNC:20968]	14	73490933	73493394	q24.3	1
ENSG00000172890	2397.93	0.139433	0.0422406	3.30091	0.000963705	0.02575	up	NADSYN1	NAD synthetase 1 [Source:HGNC Symbol;Acc:HGNC:29832]	11	71453109	71524107	q13.4	1
ENSG00000105197	1220.8	0.152002	0.0461039	3.29694	0.000977434	0.02605	up	TIMM50	translocase of inner mitochondrial membrane 50 [Source:HGNC Symbol;Acc:HGNC:23656]	19	39480412	39493785	q13.2	1
ENSG00000071054	4762.75	-0.138727	0.0421797	-3.28896	0.00100559	0.0266	down	MAP4K4	mitogen-activated protein kinase kinase kinase kinase 4 [Source:HGNC Symbol;Acc:HGNC:6866]	2	101696850	101894689	q11.2	1
ENSG00000082074	4858.69	-0.20302	0.0617924	-3.28551	0.00101798	0.0266	down	FYB1	FYN binding protein 1 [Source:HGNC Symbol;Acc:HGNC:4036]	5	39105252	39274528	p13.1	-1
ENSG00000100503	4355.69	-0.217497	0.0661953	-3.28569	0.00101733	0.0266	down	NIN	ninein [Source:HGNC Symbol;Acc:HGNC:14906]	14	50719763	50831121	q22.1	-1
ENSG00000124479	89.5381	0.527173	0.160354	3.28756	0.00101061	0.0266	up	NDP	norrin cystine knot growth factor NDP [Source:HGNC Symbol;Acc:HGNC:7678]	X	43948776	43973395	p11.3	-1
ENSG00000165178	169.475	0.460933	0.14028	3.28582	0.00101686	0.0266	up	NCF1C	neutrophil cytosolic factor 1C pseudogene [Source:HGNC Symbol;Acc:HGNC:32523]	7	75156639	75172044	q11.23	-1
ENSG00000175215	2676.28	0.148761	0.0452756	3.28566	0.00101742	0.0266	up	CTDSP2	CTD small phosphatase 2 [Source:HGNC Symbol;Acc:HGNC:17077]	12	57819927	57846729	q14.1	-1
ENSG00000204592	19145.9	0.130636	0.039739	3.28736	0.00101133	0.0266	up	HLA-E	major histocompatibility complex, class I, E [Source:HGNC Symbol;Acc:HGNC:4962]	6	30489509	30494194	p22.1	1
ENSG00000253729	5044.5	-0.224193	0.0681479	-3.2898	0.00100259	0.0266	down	PRKDC	protein kinase, DNA-activated, catalytic subunit [Source:HGNC Symbol;Acc:HGNC:9413]	8	47773108	47960183	q11.21	-1
ENSG00000130816	3200.31	-0.124393	0.0378775	-3.28409	0.00102312	0.02662	down	DNMT1	DNA methyltransferase 1 [Source:HGNC Symbol;Acc:HGNC:2976]	19	10133345	10231286	p13.2	-1
ENSG00000178980	515.546	0.236512	0.072019	3.28402	0.00102338	0.02662	up	SELENOW	selenoprotein W [Source:HGNC Symbol;Acc:HGNC:10752]	19	47778585	47784686	q13.33	1
ENSG00000127022	20283.5	-0.157997	0.0481507	-3.28131	0.00103327	0.02681	down	CANX	calnexin [Source:HGNC Symbol;Acc:HGNC:1473]	5	179678628	179731641	q35.3	1
ENSG00000135390	4429.11	0.166507	0.0507675	3.27979	0.00103885	0.02689	up	ATP5MC2	ATP synthase membrane subunit c locus 2 [Source:HGNC Symbol;Acc:HGNC:842]	12	53632726	53677408	q13.13	-1
ENSG00000139697	1965.33	-0.170564	0.0520617	-3.27618	0.0010522	0.02704	down	SBNO1	strawberry notch homolog 1 [Source:HGNC Symbol;Acc:HGNC:22973]	12	123289109	123364847	q24.31	-1
ENSG00000156802	681.483	-0.199638	0.0609335	-3.27633	0.00105166	0.02704	down	ATAD2	ATPase family AAA domain containing 2 [Source:HGNC Symbol;Acc:HGNC:30123]	8	123319850	123416350	q24.13	-1
ENSG00000173898	1112.77	-0.266776	0.0814057	-3.27711	0.00104874	0.02704	down	SPTBN2	spectrin beta, non-erythrocytic 2 [Source:HGNC Symbol;Acc:HGNC:11276]	11	66685248	66729226	q13.2	-1
ENSG00000181788	289.025	0.255094	0.0779232	3.27366	0.00106166	0.02722	up	SIAH2	siah E3 ubiquitin protein ligase 2 [Source:HGNC Symbol;Acc:HGNC:10858]	3	150741125	150763477	q25.1	-1
ENSG00000137038	665.464	0.248687	0.0759851	3.27285	0.00106471	0.02723	up	DMAC1	distal membrane arm assembly complex 1 [Source:HGNC Symbol;Acc:HGNC:30536]	9	7796500	7888380	p24.1	-1
ENSG00000163803	554.443	-0.219712	0.0671684	-3.27107	0.00107142	0.02734	down	PLB1	phospholipase B1 [Source:HGNC Symbol;Acc:HGNC:30041]	2	28457145	28644142	p23.2	1
ENSG00000109854	1874.94	0.128751	0.0394137	3.26666	0.00108823	0.02765	up	HTATIP2	HIV-1 Tat interactive protein 2 [Source:HGNC Symbol;Acc:HGNC:16637]	11	20363685	20383783	p15.1	1
ENSG00000144136	5960.33	-0.157225	0.0481332	-3.26646	0.001089	0.02765	down	SLC20A1	solute carrier family 20 member 1 [Source:HGNC Symbol;Acc:HGNC:10946]	2	112645939	112663825	q14.1	1
ENSG00000168014	1119.91	-0.169962	0.0520562	-3.26498	0.00109473	0.02773	down	C2CD3	C2 domain containing 3 centriole elongation regulator [Source:HGNC Symbol;Acc:HGNC:24564]	11	74012714	74171210	q13.4	-1
ENSG00000005700	3116.72	-0.13523	0.0414598	-3.26172	0.00110739	0.02781	down	IBTK	inhibitor of Bruton tyrosine kinase [Source:HGNC Symbol;Acc:HGNC:17853]	6	82169986	82247754	q14.1	-1
ENSG00000108861	5299.43	-0.0875404	0.0268406	-3.26149	0.00110829	0.02781	down	DUSP3	dual specificity phosphatase 3 [Source:HGNC Symbol;Acc:HGNC:3069]	17	43766125	43778977	q21.31	-1
ENSG00000165699	2002.01	-0.146386	0.0448813	-3.26162	0.00110779	0.02781	down	TSC1	TSC complex subunit 1 [Source:HGNC Symbol;Acc:HGNC:12362]	9	132891348	132946874	q34.13	-1
ENSG00000179918	4958.01	0.198241	0.0607756	3.26185	0.00110686	0.02781	up	SEPHS2	selenophosphate synthetase 2 [Source:HGNC Symbol;Acc:HGNC:19686]	16	30443631	30445874	p11.2	-1
ENSG00000089057	4589.78	-0.145184	0.0445456	-3.25922	0.00111719	0.02794	down	SLC23A2	solute carrier family 23 member 2 [Source:HGNC Symbol;Acc:HGNC:10973]	20	4852356	5010293	p13	-1
ENSG00000099219	3464.5	-0.180794	0.0555119	-3.25685	0.00112656	0.02794	down	ERMP1	endoplasmic reticulum metallopeptidase 1 [Source:HGNC Symbol;Acc:HGNC:23703]	9	5765076	5833117	p24.1	-1
ENSG00000104687	6168.51	-0.133321	0.0409426	-3.2563	0.00112875	0.02794	down	GSR	glutathione-disulfide reductase [Source:HGNC Symbol;Acc:HGNC:4623]	8	30678066	30727846	p12	-1
ENSG00000121579	4872.51	-0.145799	0.0447683	-3.25674	0.00112698	0.02794	down	NAA50	N(alpha)-acetyltransferase 50, NatE catalytic subunit [Source:HGNC Symbol;Acc:HGNC:29533]	3	113716458	113746300	q13.31	-1
ENSG00000151914	1156.92	-0.265303	0.0814291	-3.25808	0.00112167	0.02794	down	DST	dystonin [Source:HGNC Symbol;Acc:HGNC:1090]	6	56457987	56954649	p12.1	-1
ENSG00000186660	1564.59	-0.152725	0.0468928	-3.2569	0.00112635	0.02794	down	ZFP91	ZFP91 zinc finger protein [Source:HGNC Symbol;Acc:HGNC:14983]	11	58579063	58621550	q12.1	1
ENSG00000136813	4650.55	-0.153385	0.0471642	-3.25214	0.0011454	0.02822	down	ECPAS	Ecm29 proteasome adaptor and scaffold [Source:HGNC Symbol;Acc:HGNC:29020]	9	111360692	111484745	q31.3	-1
ENSG00000176340	1765.31	0.360771	0.110928	3.25229	0.00114478	0.02822	up	COX8A	cytochrome c oxidase subunit 8A [Source:HGNC Symbol;Acc:HGNC:2294]	11	63974620	63976543	q13.1	1
ENSG00000134825	518.35	0.41891	0.128849	3.25116	0.00114933	0.02825	up	TMEM258	transmembrane protein 258 [Source:HGNC Symbol;Acc:HGNC:1164]	11	61768501	61792802	q12.2	-1
ENSG00000004897	1642.23	-0.157459	0.0484581	-3.24939	0.00115652	0.0283	down	CDC27	cell division cycle 27 [Source:HGNC Symbol;Acc:HGNC:1728]	17	47117703	47189422	q21.32	-1
ENSG00000141552	794.925	0.308763	0.0950031	3.25003	0.00115394	0.0283	up	ANAPC11	anaphase promoting complex subunit 11 [Source:HGNC Symbol;Acc:HGNC:14452]	17	81890790	81900991	q25.3	1
ENSG00000038945	11418.2	-0.160774	0.0495007	-3.24792	0.00116254	0.02835	down	MSR1	macrophage scavenger receptor 1 [Source:HGNC Symbol;Acc:HGNC:7376]	8	16107878	16567490	p22	-1
ENSG00000111729	177.822	0.379943	0.117062	3.24567	0.00117176	0.02835	up	CLEC4A	C-type lectin domain family 4 member A [Source:HGNC Symbol;Acc:HGNC:13257]	12	8123632	8138607	p13.31	1
ENSG00000167645	1098.66	0.25257	0.0777982	3.24648	0.00116843	0.02835	up	YIF1B	Yip1 interacting factor homolog B, membrane trafficking protein [Source:HGNC Symbol;Acc:HGNC:30511]	19	38303558	38317273	q13.2	-1
ENSG00000179889	4774.92	-0.0736805	0.0226974	-3.24622	0.00116949	0.02835	down	PDXDC1	pyridoxal dependent decarboxylase domain containing 1 [Source:HGNC Symbol;Acc:HGNC:28995]	16	14974591	15139339	p13.11	1
ENSG00000224531	593.858	-0.192323	0.0592297	-3.24707	0.00116598	0.02835	down	SMIM13	small integral membrane protein 13 [Source:HGNC Symbol;Acc:HGNC:27356]	6	11093834	11138733	p24.2	1
ENSG00000106344	728.264	-0.159083	0.0490524	-3.24313	0.00118226	0.02835	down	RBM28	RNA binding motif protein 28 [Source:HGNC Symbol;Acc:HGNC:21863]	7	128297685	128343908	q32.1	-1
ENSG00000113269	6460.03	0.179064	0.055186	3.24474	0.00117558	0.02835	up	RNF130	ring finger protein 130 [Source:HGNC Symbol;Acc:HGNC:18280]	5	179911651	180072113	q35.3	-1
ENSG00000135218	6697.4	-0.148757	0.0458697	-3.24303	0.00118266	0.02835	down	CD36	CD36 molecule [Source:HGNC Symbol;Acc:HGNC:1663]	7	80369575	80679277	q21.11	1
ENSG00000166946	1417.78	0.146584	0.0451906	3.24368	0.00117996	0.02835	up	CCNDBP1	cyclin D1 binding protein 1 [Source:HGNC Symbol;Acc:HGNC:1587]	15	43185118	43197177	q15.2	1
ENSG00000161618	1176.23	0.323847	0.0998949	3.24188	0.00118743	0.02841	up	ALDH16A1	aldehyde dehydrogenase 16 family member A1 [Source:HGNC Symbol;Acc:HGNC:28114]	19	49453225	49471050	q13.33	1
ENSG00000004779	1356.69	0.332588	0.102617	3.24106	0.00119085	0.02842	up	NDUFAB1	NADH:ubiquinone oxidoreductase subunit AB1 [Source:HGNC Symbol;Acc:HGNC:7694]	16	23581014	23596316	p12.2	-1
ENSG00000196950	1453.65	-0.214533	0.066302	-3.23569	0.00121349	0.0289	down	SLC39A10	solute carrier family 39 member 10 [Source:HGNC Symbol;Acc:HGNC:20861]	2	195575977	195737702	q32.3	1
ENSG00000104870	5995.49	0.182468	0.0564266	3.23373	0.00122185	0.02899	up	FCGRT	Fc fragment of IgG receptor and transporter [Source:HGNC Symbol;Acc:HGNC:3621]	19	49506816	49526428	q13.33	1
ENSG00000163376	1257.24	-0.175379	0.0542366	-3.23359	0.00122244	0.02899	down	KBTBD8	kelch repeat and BTB domain containing 8 [Source:HGNC Symbol;Acc:HGNC:30691]	3	66998307	67011210	p14.1	1
ENSG00000131127	179.416	-0.368709	0.114053	-3.23279	0.00122589	0.029	down	ZNF141	zinc finger protein 141 [Source:HGNC Symbol;Acc:HGNC:12926]	4	337814	384868	p16.3	1
ENSG00000060558	765.583	0.217303	0.0672607	3.23076	0.0012346	0.02914	up	GNA15	G protein subunit alpha 15 [Source:HGNC Symbol;Acc:HGNC:4383]	19	3136033	3163749	p13.3	1
ENSG00000213047	1457.51	-0.192226	0.0595419	-3.22842	0.00124476	0.02932	down	DENND1B	DENN domain containing 1B [Source:HGNC Symbol;Acc:HGNC:28404]	1	197504748	197775696	q31.3	-1
ENSG00000065613	2089.31	-0.174292	0.0540011	-3.22758	0.00124844	0.02934	down	SLK	STE20 like kinase [Source:HGNC Symbol;Acc:HGNC:11088]	10	103967140	104029233	q24.33	1
ENSG00000188313	872.203	0.29856	0.0925385	3.22634	0.00125385	0.02941	up	PLSCR1	phospholipid scramblase 1 [Source:HGNC Symbol;Acc:HGNC:9092]	3	146515180	146544856	q24	-1
ENSG00000119655	9790.74	0.163608	0.0507376	3.22459	0.00126152	0.02952	up	NPC2	NPC intracellular cholesterol transporter 2 [Source:HGNC Symbol;Acc:HGNC:14537]	14	74476192	74494177	q24.3	-1
ENSG00000178149	263.584	0.284391	0.0882758	3.22161	0.00127471	0.02976	up	DALRD3	DALR anticodon binding domain containing 3 [Source:HGNC Symbol;Acc:HGNC:25536]	3	49015488	49022293	p21.31	-1
ENSG00000180061	589.486	0.179712	0.0558188	3.21957	0.00128385	0.02991	up	TMEM150B	transmembrane protein 150B [Source:HGNC Symbol;Acc:HGNC:34415]	19	55312801	55334048	q13.42	-1
ENSG00000130119	458.56	-0.263893	0.082024	-3.21727	0.00129419	0.02996	down	GNL3L	G protein nucleolar 3 like [Source:HGNC Symbol;Acc:HGNC:25553]	X	54530211	54567289	p11.22	1
ENSG00000130520	1891.11	0.216949	0.06743	3.21739	0.00129363	0.02996	up	LSM4	LSM4 homolog, U6 small nuclear RNA and mRNA degradation associated [Source:HGNC Symbol;Acc:HGNC:17259]	19	18306230	18323274	p13.11	-1
ENSG00000140931	2904.11	0.158813	0.0493491	3.21815	0.00129019	0.02996	up	CMTM3	CKLF like MARVEL transmembrane domain containing 3 [Source:HGNC Symbol;Acc:HGNC:19174]	16	66603874	66613892	q22.1	1
ENSG00000113558	2294.93	0.174602	0.0543108	3.21486	0.00130508	0.02996	up	SKP1	S-phase kinase associated protein 1 [Source:HGNC Symbol;Acc:HGNC:10899]	5	134148935	134177038	q31.1	-1
ENSG00000143226	598.909	0.256847	0.07988	3.21541	0.00130259	0.02996	up	FCGR2A	Fc fragment of IgG receptor IIa [Source:HGNC Symbol;Acc:HGNC:3616]	1	161505430	161524013	q23.3	1
ENSG00000147459	1677.05	-0.226272	0.070385	-3.21477	0.00130548	0.02996	down	DOCK5	dedicator of cytokinesis 5 [Source:HGNC Symbol;Acc:HGNC:23476]	8	25184689	25418082	p21.2	1
ENSG00000197020	251.442	-0.293723	0.091315	-3.2166	0.0012972	0.02996	down	ZNF100	zinc finger protein 100 [Source:HGNC Symbol;Acc:HGNC:12880]	19	21722771	21767579	p12	-1
ENSG00000160179	1236.51	0.234105	0.0729092	3.21091	0.00132314	0.03024	up	ABCG1	ATP binding cassette subfamily G member 1 [Source:HGNC Symbol;Acc:HGNC:73]	21	42199689	42297244	q22.3	1
ENSG00000187954	1015.23	0.220677	0.0687151	3.21147	0.00132057	0.03024	up	CYHR1	cysteine and histidine rich 1 [Source:HGNC Symbol;Acc:HGNC:17806]	8	144449582	144465677	q24.3	-1
ENSG00000122376	627.275	-0.19915	0.0620794	-3.20798	0.0013367	0.03042	down	SHLD2	shieldin complex subunit 2 [Source:HGNC Symbol;Acc:HGNC:28773]	10	87094161	87191468	q23.2	1
ENSG00000163946	2069.4	-0.158204	0.0493141	-3.20809	0.00133618	0.03042	down	TASOR	transcription activation suppressor [Source:HGNC Symbol;Acc:HGNC:30314]	3	56620133	56683237	p14.3	-1
ENSG00000171617	373.781	-0.241288	0.0752686	-3.20569	0.0013474	0.0306	down	ENC1	ectodermal-neural cortex 1 [Source:HGNC Symbol;Acc:HGNC:3345]	5	74627406	74641424	q13.3	-1
ENSG00000107020	788.307	0.187329	0.0584831	3.20314	0.00135938	0.0308	up	PLGRKT	plasminogen receptor with a C-terminal lysine [Source:HGNC Symbol;Acc:HGNC:23633]	9	5357971	5437925	p24.1	-1
ENSG00000123352	1032.98	-0.147074	0.0459275	-3.20231	0.00136331	0.03083	down	SPATS2	spermatogenesis associated serine rich 2 [Source:HGNC Symbol;Acc:HGNC:18650]	12	49366584	49527424	q13.12	1
ENSG00000127184	4382.84	0.259592	0.0811121	3.20041	0.00137231	0.03097	up	COX7C	cytochrome c oxidase subunit 7C [Source:HGNC Symbol;Acc:HGNC:2292]	5	86617928	86620962	q14.3	1
ENSG00000136003	2139.07	0.21798	0.0681725	3.19748	0.00138633	0.03122	up	ISCU	iron-sulfur cluster assembly enzyme [Source:HGNC Symbol;Acc:HGNC:29882]	12	108562582	108569384	q23.3	1
ENSG00000114779	803.327	0.16909	0.0529212	3.19512	0.00139773	0.03133	up	ABHD14B	abhydrolase domain containing 14B [Source:HGNC Symbol;Acc:HGNC:28235]	3	51968510	51983409	p21.2	-1
ENSG00000152082	202.381	0.411383	0.128823	3.19339	0.00140611	0.03133	up	MZT2B	mitotic spindle organizing protein 2B [Source:HGNC Symbol;Acc:HGNC:25886]	2	130181737	130190729	q21.1	1
ENSG00000168439	11662.8	-0.0888564	0.0278245	-3.19346	0.00140577	0.03133	down	STIP1	stress induced phosphoprotein 1 [Source:HGNC Symbol;Acc:HGNC:11387]	11	64185272	64204543	q13.1	1
ENSG00000175573	479.171	0.271007	0.0848591	3.19361	0.00140505	0.03133	up	C11orf68	chromosome 11 open reading frame 68 [Source:HGNC Symbol;Acc:HGNC:28801]	11	65916810	65919062	q13.1	-1
ENSG00000196976	374.762	0.373835	0.117002	3.19512	0.00139775	0.03133	up	LAGE3	L antigen family member 3 [Source:HGNC Symbol;Acc:HGNC:26058]	X	154477769	154479257	q28	-1
ENSG00000047621	1606.16	-0.152746	0.0478996	-3.18888	0.00142825	0.03176	down	C12orf4	chromosome 12 open reading frame 4 [Source:HGNC Symbol;Acc:HGNC:1184]	12	4487735	4538508	p13.32	-1
ENSG00000099875	1367.72	0.165252	0.0518568	3.1867	0.00143907	0.03194	up	MKNK2	MAPK interacting serine/threonine kinase 2 [Source:HGNC Symbol;Acc:HGNC:7111]	19	2037465	2051244	p13.3	-1
ENSG00000131475	1111.16	0.185493	0.0582507	3.18439	0.00145061	0.03213	up	VPS25	vacuolar protein sorting 25 homolog [Source:HGNC Symbol;Acc:HGNC:28122]	17	42773449	42779599	q21.2	1
ENSG00000109113	466.604	0.219622	0.0690059	3.18266	0.00145931	0.03225	up	RAB34	RAB34, member RAS oncogene family [Source:HGNC Symbol;Acc:HGNC:16519]	17	28714281	28718429	q11.2	-1
ENSG00000177556	2218	0.190511	0.0598775	3.18168	0.00146423	0.03229	up	ATOX1	antioxidant 1 copper chaperone [Source:HGNC Symbol;Acc:HGNC:798]	5	151742316	151772532	q33.1	-1
ENSG00000178896	245.633	0.330442	0.103993	3.17754	0.00148529	0.03269	up	EXOSC4	exosome component 4 [Source:HGNC Symbol;Acc:HGNC:18189]	8	144078648	144080648	q24.3	1
ENSG00000152256	449.181	-0.210569	0.0663115	-3.17545	0.00149602	0.03279	down	PDK1	pyruvate dehydrogenase kinase 1 [Source:HGNC Symbol;Acc:HGNC:8809]	2	172555373	172608669	q31.1	1
ENSG00000171466	772.679	-0.189179	0.0595679	-3.17586	0.00149394	0.03279	down	ZNF562	zinc finger protein 562 [Source:HGNC Symbol;Acc:HGNC:25950]	19	9641807	9675100	p13.2	-1
ENSG00000197852	355.62	-0.282858	0.0891024	-3.17452	0.00150084	0.03283	down	INKA2	inka box actin regulator 2 [Source:HGNC Symbol;Acc:HGNC:28045]	1	111680630	111755824	p13.2	-1
ENSG00000136286	346.226	0.313412	0.0988182	3.1716	0.00151602	0.03303	up	MYO1G	myosin IG [Source:HGNC Symbol;Acc:HGNC:13880]	7	44962662	44979088	p13	-1
ENSG00000150967	630.355	-0.242342	0.0764065	-3.17175	0.00151522	0.03303	down	ABCB9	ATP binding cassette subfamily B member 9 [Source:HGNC Symbol;Acc:HGNC:50]	12	122920951	122981649	q24.31	-1
ENSG00000111726	1356.56	0.161237	0.0508626	3.17005	0.00152411	0.03312	up	CMAS	cytidine monophosphate N-acetylneuraminic acid synthetase [Source:HGNC Symbol;Acc:HGNC:18290]	12	22046218	22065674	p12.1	1
ENSG00000141506	2395.35	0.129892	0.0409811	3.16955	0.00152677	0.03312	up	PIK3R5	phosphoinositide-3-kinase regulatory subunit 5 [Source:HGNC Symbol;Acc:HGNC:30035]	17	8878911	8965712	p13.1	-1
ENSG00000168528	1553.47	0.197224	0.062235	3.16902	0.00152956	0.03312	up	SERINC2	serine incorporator 2 [Source:HGNC Symbol;Acc:HGNC:23231]	1	31409565	31434680	p35.2	1
ENSG00000143774	2974.24	0.211877	0.0669261	3.16583	0.00154639	0.03325	up	GUK1	guanylate kinase 1 [Source:HGNC Symbol;Acc:HGNC:4693]	1	228139962	228148984	q42.13	1
ENSG00000156869	1059.84	-0.230957	0.0729308	-3.1668	0.00154126	0.03325	down	FRRS1	ferric chelate reductase 1 [Source:HGNC Symbol;Acc:HGNC:27622]	1	99708632	99766631	p21.2	-1
ENSG00000174165	771.757	0.321392	0.101527	3.16557	0.00154779	0.03325	up	ZDHHC24	zinc finger DHHC-type containing 24 [Source:HGNC Symbol;Acc:HGNC:27387]	11	66520637	66546235	q13.2	-1
ENSG00000185567	1402.98	-0.247194	0.078073	-3.16619	0.00154448	0.03325	down	AHNAK2	AHNAK nucleoprotein 2 [Source:HGNC Symbol;Acc:HGNC:20125]	14	104937244	104978374	q32.33	-1
ENSG00000113569	655.549	-0.255615	0.0808562	-3.16135	0.00157041	0.0336	down	NUP155	nucleoporin 155 [Source:HGNC Symbol;Acc:HGNC:8063]	5	37288137	37371106	p13.2	-1
ENSG00000173915	1061.24	0.23822	0.0753429	3.16181	0.00156794	0.0336	up	ATP5MD	ATP synthase membrane subunit DAPIT [Source:HGNC Symbol;Acc:HGNC:30889]	10	103389041	103396492	q24.33	-1
ENSG00000109685	1165.62	-0.152845	0.0484021	-3.15782	0.00158952	0.03394	down	NSD2	nuclear receptor binding SET domain protein 2 [Source:HGNC Symbol;Acc:HGNC:12766]	4	1871393	1982207	p16.3	1
ENSG00000163293	158.683	-0.342698	0.108628	-3.15479	0.00160611	0.03423	down	NIPAL1	NIPA like domain containing 1 [Source:HGNC Symbol;Acc:HGNC:27194]	4	47914142	48040173	p12	1
ENSG00000127311	122.206	-0.387762	0.122948	-3.15386	0.00161126	0.03427	down	HELB	DNA helicase B [Source:HGNC Symbol;Acc:HGNC:17196]	12	66302545	66347645	q14.3	1
ENSG00000158517	1174.14	0.242859	0.0770205	3.15317	0.00161505	0.03428	up	NCF1	neutrophil cytosolic factor 1 [Source:HGNC Symbol;Acc:HGNC:7660]	7	74773962	74789376	q11.23	1
ENSG00000158050	4507.05	0.287773	0.0913084	3.15166	0.00162347	0.03431	up	DUSP2	dual specificity phosphatase 2 [Source:HGNC Symbol;Acc:HGNC:3068]	2	96143169	96145440	q11.2	-1
ENSG00000169964	207.693	0.307243	0.097484	3.15173	0.00162308	0.03431	up	TMEM42	transmembrane protein 42 [Source:HGNC Symbol;Acc:HGNC:28444]	3	44861904	44865670	p21.31	1
ENSG00000186432	3222.3	-0.153285	0.0486437	-3.15118	0.00162613	0.03431	down	KPNA4	karyopherin subunit alpha 4 [Source:HGNC Symbol;Acc:HGNC:6397]	3	160495007	160565571	q25.33	-1
ENSG00000154305	1418.84	-0.15932	0.0505905	-3.14921	0.00163715	0.03448	down	MIA3	MIA SH3 domain ER export factor 3 [Source:HGNC Symbol;Acc:HGNC:24008]	1	222618097	222668007	q41	1
ENSG00000149016	649.559	0.175504	0.0557409	3.14857	0.00164074	0.03449	up	TUT1	terminal uridylyl transferase 1, U6 snRNA-specific [Source:HGNC Symbol;Acc:HGNC:26184]	11	62575045	62591637	q12.3	-1
ENSG00000108179	4801.99	0.153666	0.0488454	3.14596	0.00165541	0.03459	up	PPIF	peptidylprolyl isomerase F [Source:HGNC Symbol;Acc:HGNC:9259]	10	79347469	79355334	q22.3	1
ENSG00000173372	3028.33	0.230702	0.0733303	3.14606	0.00165484	0.03459	up	C1QA	complement C1q A chain [Source:HGNC Symbol;Acc:HGNC:1241]	1	22636628	22639678	p36.12	1
ENSG00000196705	487.29	-0.250531	0.0796238	-3.14644	0.00165271	0.03459	down	ZNF431	zinc finger protein 431 [Source:HGNC Symbol;Acc:HGNC:20809]	19	21142024	21196053	p12	1
ENSG00000167881	2088.56	-0.10655	0.0339042	-3.14268	0.00167411	0.03491	down	SRP68	signal recognition particle 68 [Source:HGNC Symbol;Acc:HGNC:11302]	17	76038775	76072517	q25.1	-1
ENSG00000213619	3095.64	0.169879	0.0540651	3.14212	0.00167727	0.03491	up	NDUFS3	NADH:ubiquinone oxidoreductase core subunit S3 [Source:HGNC Symbol;Acc:HGNC:7710]	11	47565336	47584562	p11.2	1
ENSG00000100941	1972.88	-0.185545	0.0590928	-3.13989	0.0016901	0.03511	down	PNN	pinin, desmosome associated protein [Source:HGNC Symbol;Acc:HGNC:9162]	14	39175183	39183220	q21.1	1
ENSG00000131508	1672.43	0.124016	0.0395178	3.13822	0.00169975	0.03525	up	UBE2D2	ubiquitin conjugating enzyme E2 D2 [Source:HGNC Symbol;Acc:HGNC:12475]	5	139526431	139628434	q31.2	1
ENSG00000142197	5980.23	-0.177363	0.0565403	-3.13692	0.0017073	0.03527	down	DOP1B	DOP1 leucine zipper like protein B [Source:HGNC Symbol;Acc:HGNC:1291]	21	36156782	36294274	q22.12	1
ENSG00000162244	3680.46	0.181219	0.0577656	3.13715	0.001706	0.03527	up	RPL29	ribosomal protein L29 [Source:HGNC Symbol;Acc:HGNC:10331]	3	51993522	51995895	p21.2	-1
ENSG00000102572	1941.24	-0.158053	0.0503991	-3.13602	0.00171256	0.03528	down	STK24	serine/threonine kinase 24 [Source:HGNC Symbol;Acc:HGNC:11403]	13	98445185	98577940	q32.2	-1
ENSG00000155640	362.331	-0.335907	0.107124	-3.13569	0.00171452	0.03528	down
ENSG00000158825	643.11	0.206272	0.0658163	3.13406	0.00172408	0.03541	up	CDA	cytidine deaminase [Source:HGNC Symbol;Acc:HGNC:1712]	1	20589086	20618903	p36.12	1
ENSG00000117318	651.955	0.356467	0.113779	3.13296	0.0017305	0.03547	up	ID3	inhibitor of DNA binding 3, HLH protein [Source:HGNC Symbol;Acc:HGNC:5362]	1	23557926	23559501	p36.12	-1
ENSG00000173276	791.511	-0.184352	0.0588536	-3.13238	0.00173397	0.03548	down	ZBTB21	zinc finger and BTB domain containing 21 [Source:HGNC Symbol;Acc:HGNC:13083]	21	41986831	42010387	q22.3	-1
ENSG00000169905	1674.99	-0.253427	0.0809314	-3.13138	0.00173988	0.03553	down	TOR1AIP2	torsin 1A interacting protein 2 [Source:HGNC Symbol;Acc:HGNC:24055]	1	179839967	179877803	q25.2	-1
ENSG00000100991	3285.78	0.106176	0.0339309	3.12917	0.00175301	0.0357	up	TRPC4AP	transient receptor potential cation channel subfamily C member 4 associated protein [Source:HGNC Symbol;Acc:HGNC:16181]	20	35002404	35092807	q11.22	-1
ENSG00000127463	2691.15	-0.18822	0.060156	-3.12886	0.00175487	0.0357	down	EMC1	ER membrane protein complex subunit 1 [Source:HGNC Symbol;Acc:HGNC:28957]	1	19215660	19251527	p36.13	-1
ENSG00000158864	3882.5	0.114068	0.0364759	3.12721	0.00176475	0.03583	up	NDUFS2	NADH:ubiquinone oxidoreductase core subunit S2 [Source:HGNC Symbol;Acc:HGNC:7708]	1	161197104	161214395	q23.3	1
ENSG00000084092	499.593	0.223043	0.0713372	3.1266	0.00176842	0.03584	up	NOA1	nitric oxide associated 1 [Source:HGNC Symbol;Acc:HGNC:28473]	4	56963350	56977606	q12	-1
ENSG00000204525	47412.5	0.15654	0.0501092	3.12397	0.00178426	0.03609	up	HLA-C	major histocompatibility complex, class I, C [Source:HGNC Symbol;Acc:HGNC:4933]	6	31268749	31272130	p21.33	-1
ENSG00000182952	781.686	0.171657	0.0549634	3.12311	0.00178948	0.03613	up	HMGN4	high mobility group nucleosomal binding domain 4 [Source:HGNC Symbol;Acc:HGNC:4989]	6	26538366	26546933	p22.2	1
ENSG00000088543	357.481	0.216103	0.0692133	3.12227	0.00179463	0.03617	up	C3orf18	chromosome 3 open reading frame 18 [Source:HGNC Symbol;Acc:HGNC:24837]	3	50558025	50571027	p21.31	-1
ENSG00000023572	525.514	0.274375	0.0880976	3.11445	0.00184291	0.03624	up	GLRX2	glutaredoxin 2 [Source:HGNC Symbol;Acc:HGNC:16065]	1	193090866	193106114	q31.2	-1
ENSG00000024862	447.087	0.211853	0.0679795	3.11643	0.00183058	0.03624	up	CCDC28A	coiled-coil domain containing 28A [Source:HGNC Symbol;Acc:HGNC:21098]	6	138773509	138793319	q24.1	1
ENSG00000066933	678.187	-0.233331	0.074777	-3.12036	0.00180629	0.03624	down	MYO9A	myosin IXA [Source:HGNC Symbol;Acc:HGNC:7608]	15	71822291	72118577	q23	-1
ENSG00000100307	192.905	0.310276	0.099558	3.11654	0.00182989	0.03624	up	CBX7	chromobox 7 [Source:HGNC Symbol;Acc:HGNC:1557]	22	39120167	39152680	q13.1	-1
ENSG00000105472	185.459	0.571747	0.183242	3.12018	0.00180741	0.03624	up	CLEC11A	C-type lectin domain containing 11A [Source:HGNC Symbol;Acc:HGNC:10576]	19	50723364	50725718	q13.33	1
ENSG00000144597	1761.99	-0.136933	0.0439437	-3.1161	0.00183262	0.03624	down	EAF1	ELL associated factor 1 [Source:HGNC Symbol;Acc:HGNC:20907]	3	15427598	15450635	p25.1	1
ENSG00000149932	2315.6	0.158378	0.0508122	3.11693	0.00182743	0.03624	up	TMEM219	transmembrane protein 219 [Source:HGNC Symbol;Acc:HGNC:25201]	16	29940885	29973050	p11.2	1
ENSG00000161217	4283.62	-0.110734	0.0355302	-3.11661	0.00182946	0.03624	down	PCYT1A	phosphate cytidylyltransferase 1, choline, alpha [Source:HGNC Symbol;Acc:HGNC:8754]	3	196214222	196287957	q29	-1
ENSG00000170456	602.009	-0.214556	0.0687907	-3.11897	0.00181482	0.03624	down	DENND5B	DENN domain containing 5B [Source:HGNC Symbol;Acc:HGNC:28338]	12	31382226	31591136	p11.21	-1
ENSG00000173905	1381.43	-0.166113	0.0533429	-3.11406	0.00184532	0.03624	down	GOLIM4	golgi integral membrane protein 4 [Source:HGNC Symbol;Acc:HGNC:15448]	3	168008689	168095924	q26.2	-1
ENSG00000182544	995.053	0.191257	0.0613747	3.11622	0.00183185	0.03624	up	MFSD5	major facilitator superfamily domain containing 5 [Source:HGNC Symbol;Acc:HGNC:28156]	12	53251251	53254405	q13.13	1
ENSG00000197147	846.845	-0.193565	0.0621546	-3.11424	0.00184417	0.03624	down	LRRC8B	leucine rich repeat containing 8 VRAC subunit B [Source:HGNC Symbol;Acc:HGNC:30692]	1	89524836	89597864	p22.2	1
ENSG00000257027	233.379	-0.294087	0.0942948	-3.11881	0.00181584	0.03624	down		novel transcript	12	9658567	9662085	p13.31	1
ENSG00000275074	347.337	0.288905	0.0927381	3.11528	0.00183773	0.03624	up	NUDT18	nudix hydrolase 18 [Source:HGNC Symbol;Acc:HGNC:26194]	8	22106874	22109419	p21.3	-1
ENSG00000111653	321.457	0.254761	0.0818986	3.11069	0.00186653	0.03658	up	ING4	inhibitor of growth family member 4 [Source:HGNC Symbol;Acc:HGNC:19423]	12	6650301	6663142	p13.31	-1
ENSG00000115677	16891.9	-0.141279	0.0454323	-3.10967	0.00187299	0.03664	down	HDLBP	high density lipoprotein binding protein [Source:HGNC Symbol;Acc:HGNC:4857]	2	241227264	241317061	q37.3	-1
ENSG00000123104	3694.69	-0.18885	0.0607534	-3.10847	0.00188059	0.03673	down	ITPR2	inositol 1,4,5-trisphosphate receptor type 2 [Source:HGNC Symbol;Acc:HGNC:6181]	12	26335352	26833194	p11.23	-1
ENSG00000099810	686.333	-0.20645	0.0664545	-3.10664	0.00189224	0.03678	down	MTAP	methylthioadenosine phosphorylase [Source:HGNC Symbol;Acc:HGNC:7413]	9	21802636	21937651	p21.3	1
ENSG00000108256	4142.88	-0.152049	0.0489356	-3.10713	0.00188913	0.03678	down	NUFIP2	nuclear FMR1 interacting protein 2 [Source:HGNC Symbol;Acc:HGNC:17634]	17	29255839	29294148	q11.2	-1
ENSG00000128578	238.47	-0.282588	0.0909695	-3.1064	0.00189379	0.03678	down	STRIP2	striatin interacting protein 2 [Source:HGNC Symbol;Acc:HGNC:22209]	7	129434432	129488399	q32.1	1
ENSG00000075426	1559.16	0.15332	0.0493781	3.10502	0.00190267	0.03682	up	FOSL2	FOS like 2, AP-1 transcription factor subunit [Source:HGNC Symbol;Acc:HGNC:3798]	2	28392448	28417317	p23.2	1
ENSG00000166881	809.447	-0.169211	0.0544883	-3.10546	0.00189983	0.03682	down	NEMP1	nuclear envelope integral membrane protein 1 [Source:HGNC Symbol;Acc:HGNC:29001]	12	57055643	57088063	q13.3	-1
ENSG00000157500	2078.95	-0.171248	0.0551721	-3.10389	0.00190997	0.0369	down	APPL1	adaptor protein, phosphotyrosine interacting with PH domain and leucine zipper 1 [Source:HGNC Symbol;Acc:HGNC:24035]	3	57227726	57278105	p14.3	1
ENSG00000112365	297.061	-0.257183	0.0828922	-3.10263	0.00191811	0.03692	down	ZBTB24	zinc finger and BTB domain containing 24 [Source:HGNC Symbol;Acc:HGNC:21143]	6	109462594	109483237	q21	-1
ENSG00000135842	5513.28	-0.187324	0.0603663	-3.10312	0.00191492	0.03692	down	NIBAN1	niban apoptosis regulator 1 [Source:HGNC Symbol;Acc:HGNC:16784]	1	184790724	184974508	q25.3	-1
ENSG00000119801	1766.46	0.150743	0.0486169	3.10062	0.00193114	0.03704	up	YPEL5	yippee like 5 [Source:HGNC Symbol;Acc:HGNC:18329]	2	30146941	30160533	p23.1	1
ENSG00000196417	266.737	-0.308995	0.0996415	-3.10107	0.00192823	0.03704	down	ZNF765	zinc finger protein 765 [Source:HGNC Symbol;Acc:HGNC:25092]	19	53389793	53430413	q13.42	1
ENSG00000060982	4646.99	-0.203791	0.0657408	-3.09991	0.00193577	0.03705	down	BCAT1	branched chain amino acid transaminase 1 [Source:HGNC Symbol;Acc:HGNC:976]	12	24810024	24949101	p12.1	-1
ENSG00000110367	4014.47	-0.268374	0.086633	-3.09782	0.00194947	0.03705	down	DDX6	DEAD-box helicase 6 [Source:HGNC Symbol;Acc:HGNC:2747]	11	118747763	118791164	q23.3	-1
ENSG00000177700	1422.07	0.266071	0.085901	3.09742	0.00195215	0.03705	up	POLR2L	RNA polymerase II subunit L [Source:HGNC Symbol;Acc:HGNC:9199]	11	837356	842529	p15.5	-1
ENSG00000189067	21286.5	0.102066	0.0329444	3.09812	0.00194753	0.03705	up	LITAF	lipopolysaccharide induced TNF factor [Source:HGNC Symbol;Acc:HGNC:16841]	16	11547722	11636381	p13.13	-1
ENSG00000224397	4968.76	0.140675	0.0453946	3.09894	0.00194217	0.03705	up	SMIM25	small integral membrane protein 25 [Source:HGNC Symbol;Acc:HGNC:50328]	20	50247643	50283250	q13.13	1
ENSG00000246705	383.558	0.278241	0.0897803	3.09914	0.00194086	0.03705	up	H2AFJ	H2A histone family member J [Source:HGNC Symbol;Acc:HGNC:14456]	12	14774383	14778002	p12.3	1
ENSG00000136628	4533.97	-0.120337	0.038876	-3.0954	0.00196548	0.03723	down	EPRS	glutamyl-prolyl-tRNA synthetase [Source:HGNC Symbol;Acc:HGNC:3418]	1	219968600	220046530	q41	-1
ENSG00000114850	4933.85	-0.141461	0.0457656	-3.09099	0.0019949	0.03757	down	SSR3	signal sequence receptor subunit 3 [Source:HGNC Symbol;Acc:HGNC:11325]	3	156540140	156555184	q25.31	-1
ENSG00000115268	3155.07	0.283144	0.0916335	3.08996	0.00200184	0.03757	up	RPS15	ribosomal protein S15 [Source:HGNC Symbol;Acc:HGNC:10388]	19	1438358	1440494	p13.3	1
ENSG00000142937	6703.17	0.169105	0.0547103	3.09092	0.00199538	0.03757	up	RPS8	ribosomal protein S8 [Source:HGNC Symbol;Acc:HGNC:10441]	1	44775251	44778779	p34.1	1
ENSG00000148926	170.986	0.323965	0.104848	3.08984	0.00200262	0.03757	up	ADM	adrenomedullin [Source:HGNC Symbol;Acc:HGNC:259]	11	10305073	10307397	p15.4	1
ENSG00000167468	6619.47	0.217282	0.0703149	3.09013	0.00200071	0.03757	up	GPX4	glutathione peroxidase 4 [Source:HGNC Symbol;Acc:HGNC:4556]	19	1103926	1106791	p13.3	1
ENSG00000184384	1080.19	-0.220745	0.0714469	-3.08963	0.00200405	0.03757	down	MAML2	mastermind like transcriptional coactivator 2 [Source:HGNC Symbol;Acc:HGNC:16259]	11	95976598	96343195	q21	-1
ENSG00000126458	618.405	0.298307	0.0966111	3.08771	0.00201707	0.0377	up	RRAS	RAS related [Source:HGNC Symbol;Acc:HGNC:10447]	19	49635292	49640143	q13.33	-1
ENSG00000135541	505.486	-0.224298	0.0726453	-3.08757	0.002018	0.0377	down	AHI1	Abelson helper integration site 1 [Source:HGNC Symbol;Acc:HGNC:21575]	6	135283532	135497765	q23.3	-1
ENSG00000134769	249.574	-0.279843	0.0907158	-3.08483	0.00203669	0.03791	down	DTNA	dystrobrevin alpha [Source:HGNC Symbol;Acc:HGNC:3057]	18	34493290	34891844	q12.1	1
ENSG00000161813	2311.3	-0.147211	0.0477131	-3.08534	0.00203322	0.03791	down	LARP4	La ribonucleoprotein domain family member 4 [Source:HGNC Symbol;Acc:HGNC:24320]	12	50392383	50480004	q13.12	1
ENSG00000054277	664.511	0.262671	0.0852392	3.08157	0.00205909	0.03826	up	OPN3	opsin 3 [Source:HGNC Symbol;Acc:HGNC:14007]	1	241590102	241677376	q43	-1
ENSG00000071537	8752.19	-0.135397	0.0439577	-3.08015	0.00206894	0.03834	down	SEL1L	SEL1L adaptor subunit of ERAD E3 ubiquitin ligase [Source:HGNC Symbol;Acc:HGNC:10717]	14	81471547	81533853	q31.1	-1
ENSG00000153898	319.588	0.225821	0.0733191	3.07998	0.00207018	0.03834	up	MCOLN2	mucolipin 2 [Source:HGNC Symbol;Acc:HGNC:13357]	1	84925583	84997113	p22.3	-1
ENSG00000105355	4093.36	0.129745	0.0421458	3.07848	0.0020806	0.03846	up	PLIN3	perilipin 3 [Source:HGNC Symbol;Acc:HGNC:16893]	19	4838341	4867694	p13.3	-1
ENSG00000103502	2160.37	0.178229	0.0579673	3.07464	0.00210758	0.0389	up	CDIPT	CDP-diacylglycerol--inositol 3-phosphatidyltransferase [Source:HGNC Symbol;Acc:HGNC:1769]	16	29858357	29863414	p11.2	-1
ENSG00000169442	17160.6	0.175953	0.0572582	3.07297	0.00211937	0.03905	up	CD52	CD52 molecule [Source:HGNC Symbol;Acc:HGNC:1804]	1	26317958	26320523	p36.11	1
ENSG00000124831	9123.54	-0.0963625	0.0313647	-3.07233	0.00212396	0.03906	down	LRRFIP1	LRR binding FLII interacting protein 1 [Source:HGNC Symbol;Acc:HGNC:6702]	2	237627587	237813682	q37.3	1
ENSG00000075415	11009.2	0.120706	0.0393399	3.06829	0.00215285	0.03931	up	SLC25A3	solute carrier family 25 member 3 [Source:HGNC Symbol;Acc:HGNC:10989]	12	98593591	98606379	q23.1	1
ENSG00000093217	229.525	-0.262299	0.0855117	-3.06741	0.00215925	0.03931	down	XYLB	xylulokinase [Source:HGNC Symbol;Acc:HGNC:12839]	3	38346760	38421348	p22.2	1
ENSG00000116717	138.25	0.421013	0.137168	3.06933	0.00214538	0.03931	up	GADD45A	growth arrest and DNA damage inducible alpha [Source:HGNC Symbol;Acc:HGNC:4095]	1	67685201	67688334	p31.3	1
ENSG00000120594	13841.1	-0.196819	0.0641646	-3.06741	0.00215922	0.03931	down	PLXDC2	plexin domain containing 2 [Source:HGNC Symbol;Acc:HGNC:21013]	10	19816239	20289856	p12.31	1
ENSG00000143320	17371.8	-0.097371	0.0317379	-3.06797	0.00215516	0.03931	down	CRABP2	cellular retinoic acid binding protein 2 [Source:HGNC Symbol;Acc:HGNC:2339]	1	156699606	156705816	q23.1	-1
ENSG00000171658	217.332	-0.281781	0.0917938	-3.06972	0.00214261	0.03931	down	NMRAL2P	NmrA like redox sensor 2, pseudogene [Source:HGNC Symbol;Acc:HGNC:52332]	3	185959943	185980872	q27.2	1
ENSG00000128951	368.577	0.368105	0.120076	3.06562	0.00217222	0.03948	up	DUT	deoxyuridine triphosphatase [Source:HGNC Symbol;Acc:HGNC:3078]	15	48331011	48343373	q21.1	1
ENSG00000105810	319.966	-0.295051	0.0963494	-3.06231	0.00219637	0.03978	down	CDK6	cyclin dependent kinase 6 [Source:HGNC Symbol;Acc:HGNC:1777]	7	92604921	92836594	q21.2	-1
ENSG00000164967	283.995	0.297952	0.0972904	3.0625	0.00219499	0.03978	up	RPP25L	ribonuclease P/MRP subunit p25 like [Source:HGNC Symbol;Acc:HGNC:19909]	9	34610486	34612104	p13.3	-1
ENSG00000172428	581.425	0.358595	0.117138	3.06129	0.00220387	0.03985	up	COPS9	COP9 signalosome subunit 9 [Source:HGNC Symbol;Acc:HGNC:21314]	2	240126563	240136807	q37.3	-1
ENSG00000126088	1866.79	0.141096	0.0461225	3.05915	0.00221963	0.03993	up	UROD	uroporphyrinogen decarboxylase [Source:HGNC Symbol;Acc:HGNC:12591]	1	45010950	45015575	p34.1	1
ENSG00000188185	77.7195	-0.501389	0.163894	-3.05923	0.0022191	0.03993	down	LINC00265	long intergenic non-protein coding RNA 265 [Source:HGNC Symbol;Acc:HGNC:28019]	7	39733430	39793092	p14.1	1
ENSG00000198818	1175.85	0.179433	0.0586354	3.06016	0.00221221	0.03993	up	SFT2D1	SFT2 domain containing 1 [Source:HGNC Symbol;Acc:HGNC:21102]	6	166319728	166342576	q27	-1
ENSG00000013619	122.514	0.373693	0.122179	3.05857	0.00222399	0.03995	up	MAMLD1	mastermind like domain containing 1 [Source:HGNC Symbol;Acc:HGNC:2568]	X	150361422	150514178	q28	1
ENSG00000101916	1107.23	0.256605	0.0839579	3.05636	0.00224044	0.04017	up	TLR8	toll like receptor 8 [Source:HGNC Symbol;Acc:HGNC:15632]	X	12906620	12923169	p22.2	1
ENSG00000123505	5732.26	-0.129292	0.0423863	-3.05032	0.00228597	0.04085	down	AMD1	adenosylmethionine decarboxylase 1 [Source:HGNC Symbol;Acc:HGNC:457]	6	110874770	110898879	q21	1
ENSG00000126432	1899.72	0.19728	0.064675	3.05033	0.00228589	0.04085	up	PRDX5	peroxiredoxin 5 [Source:HGNC Symbol;Acc:HGNC:9355]	11	64318121	64321811	q13.1	1
ENSG00000088367	5952.39	-0.128314	0.0421293	-3.04573	0.0023212	0.04107	down	EPB41L1	erythrocyte membrane protein band 4.1 like 1 [Source:HGNC Symbol;Acc:HGNC:3378]	20	36091504	36232799	q11.23	1
ENSG00000105254	1182.62	0.224461	0.0736691	3.04688	0.00231232	0.04107	up	TBCB	tubulin folding cofactor B [Source:HGNC Symbol;Acc:HGNC:1989]	19	36114289	36125947	q13.12	1
ENSG00000138085	1531.92	0.16124	0.0529084	3.04753	0.00230731	0.04107	up	ATRAID	all-trans retinoic acid induced differentiation factor [Source:HGNC Symbol;Acc:HGNC:24090]	2	27212027	27217178	p23.3	1
ENSG00000156928	314.408	0.293899	0.0964467	3.04727	0.00230933	0.04107	up	MALSU1	mitochondrial assembly of ribosomal large subunit 1 [Source:HGNC Symbol;Acc:HGNC:21721]	7	23298739	23311729	p15.3	1
ENSG00000177352	319.888	0.225277	0.0739474	3.04644	0.00231567	0.04107	up	CCDC71	coiled-coil domain containing 71 [Source:HGNC Symbol;Acc:HGNC:25760]	3	49162535	49166331	p21.31	-1
ENSG00000205352	1788.47	0.131007	0.0430086	3.04605	0.00231866	0.04107	up	PRR13	proline rich 13 [Source:HGNC Symbol;Acc:HGNC:24528]	12	53441678	53446645	q13.13	1
ENSG00000122862	12560.5	0.151234	0.0496799	3.04416	0.00233327	0.04115	up	SRGN	serglycin [Source:HGNC Symbol;Acc:HGNC:9361]	10	69088103	69104805	q22.1	1
ENSG00000185811	2366.32	-0.178226	0.0585377	-3.04464	0.00232961	0.04115	down	IKZF1	IKAROS family zinc finger 1 [Source:HGNC Symbol;Acc:HGNC:13176]	7	50304068	50405101	p12.2	1
ENSG00000153207	1161.74	-0.167491	0.0550429	-3.04291	0.00234302	0.04126	down	AHCTF1	AT-hook containing transcription factor 1 [Source:HGNC Symbol;Acc:HGNC:24618]	1	246839098	246931967	q44	-1
ENSG00000136997	342.879	-0.243507	0.0800432	-3.0422	0.00234857	0.04129	down	MYC	MYC proto-oncogene, bHLH transcription factor [Source:HGNC Symbol;Acc:HGNC:7553]	8	127735434	127742951	q24.21	1
ENSG00000170653	404.508	-0.205263	0.0675275	-3.03969	0.0023682	0.04156	down	ATF7	activating transcription factor 7 [Source:HGNC Symbol;Acc:HGNC:792]	12	53507856	53626410	q13.13	-1
ENSG00000109111	4453	-0.127201	0.0418647	-3.03839	0.00237845	0.04168	down	SUPT6H	SPT6 homolog, histone chaperone and transcription elongation factor [Source:HGNC Symbol;Acc:HGNC:11470]	17	28662198	28702679	q11.2	1
ENSG00000075624	181397	-0.199936	0.0658597	-3.03579	0.00239905	0.04188	down	ACTB	actin beta [Source:HGNC Symbol;Acc:HGNC:132]	7	5527148	5563784	p22.1	-1
ENSG00000075651	1568.81	0.182294	0.0600745	3.03447	0.0024096	0.04188	up	PLD1	phospholipase D1 [Source:HGNC Symbol;Acc:HGNC:9067]	3	171600404	171810950	q26.31	-1
ENSG00000107290	3383.92	-0.213735	0.0704345	-3.03451	0.00240924	0.04188	down	SETX	senataxin [Source:HGNC Symbol;Acc:HGNC:445]	9	132261356	132354986	q34.13	-1
ENSG00000145819	862.235	-0.200644	0.0660939	-3.03574	0.00239943	0.04188	down	ARHGAP26	Rho GTPase activating protein 26 [Source:HGNC Symbol;Acc:HGNC:17073]	5	142770377	143229011	q31.3	1
ENSG00000163956	7831.44	0.121066	0.0398844	3.03542	0.00240203	0.04188	up	LRPAP1	LDL receptor related protein associated protein 1 [Source:HGNC Symbol;Acc:HGNC:6701]	4	3503612	3532446	p16.3	-1
ENSG00000259291	87.6743	-0.466854	0.153888	-3.03373	0.00241552	0.04191	down	ZNF710-AS1	ZNF710 antisense RNA 1 [Source:HGNC Symbol;Acc:HGNC:53141]	15	90074512	90082207	q26.1	-1
ENSG00000092068	7809.1	-0.19233	0.0635001	-3.02882	0.0024551	0.04224	down	SLC7A8	solute carrier family 7 member 8 [Source:HGNC Symbol;Acc:HGNC:11066]	14	23125295	23183674	q11.2	-1
ENSG00000100815	1426.88	-0.196957	0.0650206	-3.02915	0.00245244	0.04224	down	TRIP11	thyroid hormone receptor interactor 11 [Source:HGNC Symbol;Acc:HGNC:12305]	14	91965991	92040896	q32.12	-1
ENSG00000110628	548.645	0.291289	0.0961952	3.0281	0.00246097	0.04224	up	SLC22A18	solute carrier family 22 member 18 [Source:HGNC Symbol;Acc:HGNC:10964]	11	2899721	2925246	p15.4	1
ENSG00000113360	989.907	-0.175316	0.0579166	-3.02704	0.0024696	0.04224	down	DROSHA	drosha ribonuclease III [Source:HGNC Symbol;Acc:HGNC:17904]	5	31400497	31532196	p13.3	-1
ENSG00000136715	1405.21	-0.17968	0.0593398	-3.02799	0.00246187	0.04224	down	SAP130	Sin3A associated protein 130 [Source:HGNC Symbol;Acc:HGNC:29813]	2	127941217	128028120	q14.3	-1
ENSG00000149923	1901.49	0.173662	0.0573665	3.02724	0.00246801	0.04224	up	PPP4C	protein phosphatase 4 catalytic subunit [Source:HGNC Symbol;Acc:HGNC:9319]	16	30075978	30085376	p11.2	1
ENSG00000151806	1288.31	-0.141358	0.0466813	-3.02814	0.00246062	0.04224	down	GUF1	GUF1 homolog, GTPase [Source:HGNC Symbol;Acc:HGNC:25799]	4	44678420	44700928	p12	1
ENSG00000160446	1060	0.216853	0.0715684	3.03001	0.00244548	0.04224	up	ZDHHC12	zinc finger DHHC-type containing 12 [Source:HGNC Symbol;Acc:HGNC:19159]	9	128720870	128724127	q34.11	-1
ENSG00000275385	754.124	0.28518	0.0942026	3.02731	0.00246744	0.04224	up	CCL18	C-C motif chemokine ligand 18 [Source:HGNC Symbol;Acc:HGNC:10616]	17	36064272	36072032	q12	1
ENSG00000182782	294.235	0.334508	0.110591	3.02473	0.00248855	0.0425	up	HCAR2	hydroxycarboxylic acid receptor 2 [Source:HGNC Symbol;Acc:HGNC:24827]	12	122701293	122703357	q24.31	-1
ENSG00000007038	743.431	0.216008	0.0714354	3.02382	0.00249602	0.04256	up	PRSS21	serine protease 21 [Source:HGNC Symbol;Acc:HGNC:9485]	16	2817180	2826304	p13.3	1
ENSG00000177189	3886.48	-0.149411	0.0494437	-3.02183	0.00251253	0.04277	down	RPS6KA3	ribosomal protein S6 kinase A3 [Source:HGNC Symbol;Acc:HGNC:10432]	X	20149911	20267519	p22.12	-1
ENSG00000117906	743.598	0.180788	0.0598802	3.01915	0.00253482	0.04301	up	RCN2	reticulocalbin 2 [Source:HGNC Symbol;Acc:HGNC:9935]	15	76931738	76954393	q24.3	1
ENSG00000126870	218.048	-0.296283	0.0981507	-3.01866	0.00253899	0.04301	down	WDR60	WD repeat domain 60 [Source:HGNC Symbol;Acc:HGNC:21862]	7	158856558	158956747	q36.3	1
ENSG00000197506	10700.9	-0.145509	0.0482017	-3.01875	0.0025382	0.04301	down	SLC28A3	solute carrier family 28 member 3 [Source:HGNC Symbol;Acc:HGNC:16484]	9	84275457	84340758	q21.33	-1
ENSG00000068654	2218.73	-0.202433	0.067092	-3.01725	0.00255078	0.04307	down	POLR1A	RNA polymerase I subunit A [Source:HGNC Symbol;Acc:HGNC:17264]	2	86020216	86106155	p11.2	-1
ENSG00000097033	5608.94	-0.0975263	0.0323274	-3.01683	0.00255435	0.04307	down	SH3GLB1	SH3 domain containing GRB2 like, endophilin B1 [Source:HGNC Symbol;Acc:HGNC:10833]	1	86704570	86748184	p22.3	1
ENSG00000111786	1146.64	0.209529	0.0694634	3.01639	0.00255802	0.04307	up	SRSF9	serine and arginine rich splicing factor 9 [Source:HGNC Symbol;Acc:HGNC:10791]	12	120461672	120469748	q24.31	-1
ENSG00000136167	112698	-0.132032	0.0437623	-3.01702	0.00255272	0.04307	down	LCP1	lymphocyte cytosolic protein 1 [Source:HGNC Symbol;Acc:HGNC:6528]	13	46125920	46211871	q14.13	-1
ENSG00000051596	142.327	0.519768	0.172488	3.01335	0.00258381	0.04325	up	THOC3	THO complex 3 [Source:HGNC Symbol;Acc:HGNC:19072]	5	175917873	176034680	q35.2	-1
ENSG00000051620	261.085	0.349317	0.115907	3.01377	0.00258024	0.04325	up	HEBP2	heme binding protein 2 [Source:HGNC Symbol;Acc:HGNC:15716]	6	138403531	138422197	q24.1	1
ENSG00000116199	974.693	-0.189947	0.0630483	-3.01272	0.00258918	0.04325	down	FAM20B	FAM20B glycosaminoglycan xylosylkinase [Source:HGNC Symbol;Acc:HGNC:23017]	1	179025804	179076567	q25.2	1
ENSG00000137818	10552.7	0.182908	0.0607156	3.01254	0.00259074	0.04325	up	RPLP1	ribosomal protein lateral stalk subunit P1 [Source:HGNC Symbol;Acc:HGNC:10372]	15	69452814	69456205	q23	1
ENSG00000168701	778.908	0.225956	0.0750132	3.01222	0.00259343	0.04325	up	TMEM208	transmembrane protein 208 [Source:HGNC Symbol;Acc:HGNC:25015]	16	67227103	67229278	q22.1	1
ENSG00000168802	1883.37	0.139776	0.0463912	3.01298	0.00258696	0.04325	up	CHTF8	chromosome transmission fidelity factor 8 [Source:HGNC Symbol;Acc:HGNC:24353]	16	69118010	69132578	q22.1	-1
ENSG00000125652	603.127	0.656269	0.217905	3.01172	0.00259774	0.04326	up	ALKBH7	alkB homolog 7 [Source:HGNC Symbol;Acc:HGNC:21306]	19	6372794	6375250	p13.3	1
ENSG00000108389	2193.9	-0.133678	0.0444288	-3.00882	0.00262261	0.04344	down	MTMR4	myotubularin related protein 4 [Source:HGNC Symbol;Acc:HGNC:7452]	17	58489529	58517905	q22	-1
ENSG00000126264	730.794	0.327212	0.10879	3.00775	0.00263191	0.04344	up	HCST	hematopoietic cell signal transducer [Source:HGNC Symbol;Acc:HGNC:16977]	19	35902529	35904377	q13.12	1
ENSG00000127334	1908.89	-0.137702	0.0457837	-3.00766	0.00263267	0.04344	down	DYRK2	dual specificity tyrosine phosphorylation regulated kinase 2 [Source:HGNC Symbol;Acc:HGNC:3093]	12	67648338	67665406	q15	1
ENSG00000165516	303.54	0.255346	0.0848673	3.00877	0.00262311	0.04344	up	KLHDC2	kelch domain containing 2 [Source:HGNC Symbol;Acc:HGNC:20231]	14	49768130	49786385	q21.3	1
ENSG00000176171	211.287	0.268433	0.0892372	3.00809	0.00262897	0.04344	up	BNIP3	BCL2 interacting protein 3 [Source:HGNC Symbol;Acc:HGNC:1084]	10	131966455	131982013	q26.3	-1
ENSG00000213741	3299.06	0.390766	0.129907	3.00805	0.00262927	0.04344	up	RPS29	ribosomal protein S29 [Source:HGNC Symbol;Acc:HGNC:10419]	14	49570984	49599164	q21.3	-1
ENSG00000007237	4563.52	-0.153593	0.0510985	-3.00582	0.00264862	0.04363	down	GAS7	growth arrest specific 7 [Source:HGNC Symbol;Acc:HGNC:4169]	17	9910609	10198551	p13.1	-1
ENSG00000198624	855.212	0.14956	0.0498123	3.00248	0.00267793	0.04405	up	CCDC69	coiled-coil domain containing 69 [Source:HGNC Symbol;Acc:HGNC:24487]	5	151181052	151224093	q33.1	-1
ENSG00000148803	979.703	0.235369	0.0784539	3.0001	0.00269893	0.04431	up	FUOM	fucose mutarotase [Source:HGNC Symbol;Acc:HGNC:24733]	10	133355158	133358025	q26.3	-1
ENSG00000186577	391.658	0.249341	0.08312	2.99977	0.00270181	0.04431	up	SMIM29	small integral membrane protein 29 [Source:HGNC Symbol;Acc:HGNC:1340]	6	34246381	34249108	p21.31	-1
ENSG00000072840	318.504	-0.23396	0.0780584	-2.99725	0.00272429	0.04434	down	EVC	EvC ciliary complex subunit 1 [Source:HGNC Symbol;Acc:HGNC:3497]	4	5711201	5814305	p16.2	1
ENSG00000185043	1611.68	0.184357	0.0614816	2.99857	0.00271248	0.04434	up	CIB1	calcium and integrin binding 1 [Source:HGNC Symbol;Acc:HGNC:16920]	15	90229975	90234047	q26.1	-1
ENSG00000204237	263.899	0.311093	0.103792	2.99726	0.00272421	0.04434	up	OXLD1	oxidoreductase like domain containing 1 [Source:HGNC Symbol;Acc:HGNC:27901]	17	81665036	81666635	q25.3	-1
ENSG00000213614	1810.17	0.158217	0.0527804	2.99765	0.00272072	0.04434	up	HEXA	hexosaminidase subunit alpha [Source:HGNC Symbol;Acc:HGNC:4878]	15	72340919	72376476	q23	-1
ENSG00000249915	1773.33	0.158368	0.0528223	2.99812	0.00271654	0.04434	up	PDCD6	programmed cell death 6 [Source:HGNC Symbol;Acc:HGNC:8765]	5	271621	314974	p15.33	1
ENSG00000147274	2178.87	-0.137462	0.0458757	-2.99639	0.00273197	0.04439	down	RBMX	RNA binding motif protein X-linked [Source:HGNC Symbol;Acc:HGNC:9910]	X	136848004	136880764	q26.3	-1
ENSG00000172869	4905.39	-0.174573	0.0582693	-2.99597	0.00273573	0.04439	down	DMXL1	Dmx like 1 [Source:HGNC Symbol;Acc:HGNC:2937]	5	119037772	119249138	q23.1	1
ENSG00000100284	3261.35	0.14216	0.0474625	2.99521	0.0027426	0.04443	up	TOM1	target of myb1 membrane trafficking protein [Source:HGNC Symbol;Acc:HGNC:11982]	22	35299275	35347992	q12.3	1
ENSG00000171488	569.934	-0.237368	0.07928	-2.99405	0.002753	0.04453	down	LRRC8C	leucine rich repeat containing 8 VRAC subunit C [Source:HGNC Symbol;Acc:HGNC:25075]	1	89633072	89769903	p22.2	1
ENSG00000138640	517.093	-0.215176	0.0718878	-2.99321	0.00276057	0.04459	down	FAM13A	family with sequence similarity 13 member A [Source:HGNC Symbol;Acc:HGNC:19367]	4	88725955	89111398	q22.1	-1
ENSG00000164944	1486.91	-0.152023	0.0508098	-2.99199	0.00277163	0.0447	down	VIRMA	vir like m6A methyltransferase associated [Source:HGNC Symbol;Acc:HGNC:24500]	8	94487689	94553529	q22.1	-1
ENSG00000105404	543.774	0.372428	0.124496	2.99148	0.00277632	0.04471	up	RABAC1	Rab acceptor 1 [Source:HGNC Symbol;Acc:HGNC:9794]	19	41956681	41959321	q13.2	-1
ENSG00000011422	13123.2	0.129646	0.0433482	2.99081	0.00278236	0.04474	up	PLAUR	plasminogen activator, urokinase receptor [Source:HGNC Symbol;Acc:HGNC:9053]	19	43646095	43670547	q13.31	-1
ENSG00000124789	1597.09	-0.134321	0.0449315	-2.98947	0.00279464	0.0448	down	NUP153	nucleoporin 153 [Source:HGNC Symbol;Acc:HGNC:8062]	6	17615035	17706834	p22.3	-1
ENSG00000165782	982.902	0.166757	0.055789	2.98906	0.00279839	0.0448	up	PIP4P1	phosphatidylinositol-4,5-bisphosphate 4-phosphatase 1 [Source:HGNC Symbol;Acc:HGNC:19299]	14	20457719	20461612	q11.2	-1
ENSG00000172663	464.573	0.320648	0.107257	2.98954	0.002794	0.0448	up	TMEM134	transmembrane protein 134 [Source:HGNC Symbol;Acc:HGNC:26142]	11	67461710	67469272	q13.2	-1
ENSG00000137776	2209.82	-0.156355	0.0523172	-2.98859	0.00280266	0.0448	down	SLTM	SAFB like transcription modulator [Source:HGNC Symbol;Acc:HGNC:20709]	15	58879050	58933679	q22.1	-1
ENSG00000009954	2493.97	-0.136195	0.0456012	-2.98667	0.00282038	0.04494	down	BAZ1B	bromodomain adjacent to zinc finger domain 1B [Source:HGNC Symbol;Acc:HGNC:961]	7	73440406	73522293	q11.23	-1
ENSG00000011566	1164.13	-0.157543	0.0527726	-2.98532	0.00283286	0.04494	down	MAP4K3	mitogen-activated protein kinase kinase kinase kinase 3 [Source:HGNC Symbol;Acc:HGNC:6865]	2	39249266	39437301	p22.1	-1
ENSG00000044574	15697	-0.155467	0.0520755	-2.98542	0.00283194	0.04494	down	HSPA5	heat shock protein family A (Hsp70) member 5 [Source:HGNC Symbol;Acc:HGNC:5238]	9	125234853	125241343	q33.3	-1
ENSG00000106012	841.698	-0.158112	0.0529529	-2.98589	0.00282754	0.04494	down	IQCE	IQ motif containing E [Source:HGNC Symbol;Acc:HGNC:29171]	7	2558972	2614733	p22.3	1
ENSG00000150768	1647.31	-0.14023	0.0469713	-2.98543	0.00283176	0.04494	down	DLAT	dihydrolipoamide S-acetyltransferase [Source:HGNC Symbol;Acc:HGNC:2896]	11	112024814	112064390	q23.1	1
ENSG00000101017	3437.38	0.146104	0.0489529	2.98458	0.00283969	0.04499	up	CD40	CD40 molecule [Source:HGNC Symbol;Acc:HGNC:11919]	20	46118278	46129863	q13.12	1
ENSG00000105677	1152.5	0.213955	0.0717427	2.98226	0.00286133	0.04507	up	TMEM147	transmembrane protein 147 [Source:HGNC Symbol;Acc:HGNC:30414]	19	35545600	35547526	q13.12	1
ENSG00000112667	926.528	0.461119	0.154647	2.98176	0.00286601	0.04507	up	DNPH1	2'-deoxynucleoside 5'-phosphate N-hydrolase 1 [Source:HGNC Symbol;Acc:HGNC:21218]	6	43225629	43229484	p21.1	-1
ENSG00000132906	604.671	0.163767	0.0548905	2.98351	0.00284962	0.04507	up	CASP9	caspase 9 [Source:HGNC Symbol;Acc:HGNC:1511]	1	15490832	15526534	p36.21	-1
ENSG00000143543	2723.62	0.229514	0.0769643	2.98209	0.00286292	0.04507	up	JTB	jumping translocation breakpoint [Source:HGNC Symbol;Acc:HGNC:6201]	1	153974269	153977674	q21.3	-1
ENSG00000155846	2891.29	-0.211321	0.0708528	-2.98253	0.00285873	0.04507	down	PPARGC1B	PPARG coactivator 1 beta [Source:HGNC Symbol;Acc:HGNC:30022]	5	149730298	149855022	q32	1
ENSG00000090581	3073.8	0.150854	0.0506201	2.98012	0.00288133	0.04523	up	GNPTG	N-acetylglucosamine-1-phosphate transferase subunit gamma [Source:HGNC Symbol;Acc:HGNC:23026]	16	1351931	1364113	p13.3	1
ENSG00000119772	1047.3	-0.182814	0.0613508	-2.97982	0.00288421	0.04523	down	DNMT3A	DNA methyltransferase 3 alpha [Source:HGNC Symbol;Acc:HGNC:2978]	2	25227855	25342590	p23.3	-1
ENSG00000101307	1645.62	-0.139981	0.047016	-2.9773	0.00290799	0.0454	down	SIRPB1	signal regulatory protein beta 1 [Source:HGNC Symbol;Acc:HGNC:15928]	20	1563521	1620061	p13	-1
ENSG00000109475	2423.84	0.274976	0.0923545	2.9774	0.00290707	0.0454	up	RPL34	ribosomal protein L34 [Source:HGNC Symbol;Acc:HGNC:10340]	4	108620566	108630412	q25	1
ENSG00000214193	667.573	-0.21337	0.0716517	-2.97788	0.00290248	0.0454	down	SH3D21	SH3 domain containing 21 [Source:HGNC Symbol;Acc:HGNC:26236]	1	36306368	36329340	p34.3	1
ENSG00000213465	318.456	0.344576	0.115766	2.97648	0.00291574	0.04545	up	ARL2	ADP ribosylation factor like GTPase 2 [Source:HGNC Symbol;Acc:HGNC:693]	11	65014160	65022184	q13.1	1
ENSG00000103245	546.336	0.182175	0.0612248	2.97552	0.00292494	0.04553	up	CIAO3	cytosolic iron-sulfur assembly component 3 [Source:HGNC Symbol;Acc:HGNC:14179]	16	729760	741329	p13.3	-1
ENSG00000112249	2262.93	-0.186318	0.0626335	-2.97474	0.00293238	0.04558	down	ASCC3	activating signal cointegrator 1 complex subunit 3 [Source:HGNC Symbol;Acc:HGNC:18697]	6	100508194	100881372	q16.3	-1
ENSG00000078674	4027.4	-0.176457	0.0593468	-2.97333	0.00294589	0.04573	down	PCM1	pericentriolar material 1 [Source:HGNC Symbol;Acc:HGNC:8727]	8	17922840	18029944	p22	1
ENSG00000072501	4007.87	-0.144238	0.0485572	-2.97047	0.00297345	0.04578	down	SMC1A	structural maintenance of chromosomes 1A [Source:HGNC Symbol;Acc:HGNC:11111]	X	53374149	53422728	p11.22	-1
ENSG00000119650	116.396	0.388165	0.130625	2.9716	0.00296254	0.04578	up	IFT43	intraflagellar transport 43 [Source:HGNC Symbol;Acc:HGNC:29669]	14	75902136	76084585	q24.3	1
ENSG00000160285	4243.21	0.128929	0.0434014	2.97061	0.00297207	0.04578	up	LSS	lanosterol synthase [Source:HGNC Symbol;Acc:HGNC:6708]	21	46188141	46228824	q22.3	-1
ENSG00000166920	3236.62	0.187277	0.0630556	2.97004	0.00297763	0.04578	up	C15orf48	chromosome 15 open reading frame 48 [Source:HGNC Symbol;Acc:HGNC:29898]	15	45430529	45448761	q21.1	1
ENSG00000173548	651.14	0.155732	0.0524312	2.97022	0.00297586	0.04578	up	SNX33	sorting nexin 33 [Source:HGNC Symbol;Acc:HGNC:28468]	15	75647906	75662301	q24.2	1
ENSG00000180233	296.983	0.356955	0.120157	2.97074	0.0029708	0.04578	up	ZNRF2	zinc and ring finger 2 [Source:HGNC Symbol;Acc:HGNC:22316]	7	30284597	30367689	p14.3	1
ENSG00000185909	511.258	0.22827	0.0768623	2.96986	0.00297935	0.04578	up	KLHDC8B	kelch domain containing 8B [Source:HGNC Symbol;Acc:HGNC:28557]	3	49171598	49176486	p21.31	1
ENSG00000185880	1466.44	0.128435	0.043271	2.96816	0.0029959	0.04597	up	TRIM69	tripartite motif containing 69 [Source:HGNC Symbol;Acc:HGNC:17857]	15	44728988	44767829	q21.1	1
ENSG00000179119	1107.53	-0.147857	0.049834	-2.96699	0.00300728	0.04608	down	SPTY2D1	SPT2 chromatin protein domain containing 1 [Source:HGNC Symbol;Acc:HGNC:26818]	11	18606403	18634791	p15.1	-1
ENSG00000117523	7023.99	-0.186014	0.062719	-2.96584	0.00301859	0.04614	down	PRRC2C	proline rich coiled-coil 2C [Source:HGNC Symbol;Acc:HGNC:24903]	1	171485551	171593511	q24.3	1
ENSG00000138778	222.706	-0.320143	0.107947	-2.96574	0.0030196	0.04614	down	CENPE	centromere protein E [Source:HGNC Symbol;Acc:HGNC:1856]	4	103105349	103198445	q24	-1
ENSG00000105939	1615.82	-0.186518	0.0629064	-2.96501	0.00302675	0.04618	down	ZC3HAV1	zinc finger CCCH-type containing, antiviral 1 [Source:HGNC Symbol;Acc:HGNC:23721]	7	139043515	139109720	q34	-1
ENSG00000090487	3804.12	0.106192	0.0358219	2.96444	0.00303231	0.04618	up	SPG21	SPG21 abhydrolase domain containing, maspardin [Source:HGNC Symbol;Acc:HGNC:20373]	15	64963022	64990310	q22.31	-1
ENSG00000128607	1211.8	-0.145784	0.0491831	-2.96411	0.00303563	0.04618	down	KLHDC10	kelch domain containing 10 [Source:HGNC Symbol;Acc:HGNC:22194]	7	130070534	130135705	q32.2	1
ENSG00000233927	4380.97	0.267737	0.0903505	2.96332	0.00304344	0.04624	up	RPS28	ribosomal protein S28 [Source:HGNC Symbol;Acc:HGNC:10418]	19	8321158	8323340	p13.2	1
ENSG00000106829	358.927	0.20155	0.068053	2.96166	0.00305989	0.04642	up	TLE4	TLE family member 4, transcriptional corepressor [Source:HGNC Symbol;Acc:HGNC:11840]	9	79571773	79726882	q21.31	1
ENSG00000143079	1032.59	-0.153342	0.0517846	-2.96114	0.00306503	0.04643	down	CTTNBP2NL	CTTNBP2 N-terminal like [Source:HGNC Symbol;Acc:HGNC:25330]	1	112396214	112463456	p13.2	1
ENSG00000177733	1825.37	0.156599	0.0529196	2.95918	0.00308454	0.04666	up	HNRNPA0	heterogeneous nuclear ribonucleoprotein A0 [Source:HGNC Symbol;Acc:HGNC:5030]	5	137745651	137754363	q31.2	-1
ENSG00000119285	971.574	-0.185686	0.0627607	-2.95863	0.0030901	0.04668	down	HEATR1	HEAT repeat containing 1 [Source:HGNC Symbol;Acc:HGNC:25517]	1	236549005	236604516	q43	-1
ENSG00000134313	4089.74	-0.150076	0.0507529	-2.95699	0.00310661	0.04681	down	KIDINS220	kinase D interacting substrate 220 [Source:HGNC Symbol;Acc:HGNC:29508]	2	8721081	8837630	p25.1	-1
ENSG00000143149	2329.68	0.113126	0.0382582	2.9569	0.00310749	0.04681	up	ALDH9A1	aldehyde dehydrogenase 9 family member A1 [Source:HGNC Symbol;Acc:HGNC:412]	1	165662216	165698863	q24.1	-1
ENSG00000165271	1790.85	-0.139129	0.0470676	-2.95595	0.00311712	0.04689	down	NOL6	nucleolar protein 6 [Source:HGNC Symbol;Acc:HGNC:19910]	9	33461353	33473930	p13.3	-1
ENSG00000115825	1292.46	-0.135857	0.045996	-2.95368	0.00314009	0.04717	down	PRKD3	protein kinase D3 [Source:HGNC Symbol;Acc:HGNC:9408]	2	37250502	37324808	p22.2	-1
ENSG00000243449	161.446	1.72301	0.583465	2.95307	0.00314635	0.0472	up	C4orf48	chromosome 4 open reading frame 48 [Source:HGNC Symbol;Acc:HGNC:34437]	4	2041993	2043970	p16.3	1
ENSG00000011478	245.228	0.284647	0.0965079	2.94947	0.00318317	0.04748	up	QPCTL	glutaminyl-peptide cyclotransferase like [Source:HGNC Symbol;Acc:HGNC:25952]	19	45692666	45703989	q13.32	1
ENSG00000130818	318.608	-0.230249	0.0780642	-2.94949	0.00318302	0.04748	down	ZNF426	zinc finger protein 426 [Source:HGNC Symbol;Acc:HGNC:20725]	19	9523223	9538645	p13.2	-1
ENSG00000154229	2742.42	-0.169187	0.0573669	-2.94921	0.00318588	0.04748	down	PRKCA	protein kinase C alpha [Source:HGNC Symbol;Acc:HGNC:9393]	17	66302613	66810743	q24.2	1
ENSG00000182158	2772.88	-0.158253	0.0536459	-2.94996	0.00317815	0.04748	down	CREB3L2	cAMP responsive element binding protein 3 like 2 [Source:HGNC Symbol;Acc:HGNC:23720]	7	137874979	138002086	q33	-1
ENSG00000185650	2620.53	0.173043	0.0586766	2.9491	0.00318702	0.04748	up	ZFP36L1	ZFP36 ring finger protein like 1 [Source:HGNC Symbol;Acc:HGNC:1107]	14	68787660	68796253	q24.1	-1
ENSG00000169976	1387.03	0.193035	0.0654726	2.94834	0.00319487	0.04753	up	SF3B5	splicing factor 3b subunit 5 [Source:HGNC Symbol;Acc:HGNC:21083]	6	144094884	144095573	q24.2	-1
ENSG00000133056	583.345	-0.20477	0.0694707	-2.94758	0.00320274	0.04758	down	PIK3C2B	phosphatidylinositol-4-phosphate 3-kinase catalytic subunit type 2 beta [Source:HGNC Symbol;Acc:HGNC:8972]	1	204422628	204494724	q32.1	-1
ENSG00000102805	581.485	0.234257	0.0794951	2.94681	0.00321073	0.04763	up	CLN5	CLN5 intracellular trafficking protein [Source:HGNC Symbol;Acc:HGNC:2076]	13	76990660	77019143	q22.3	1
ENSG00000115896	1466.82	-0.142353	0.0483157	-2.94632	0.00321583	0.04764	down	PLCL1	phospholipase C like 1 (inactive) [Source:HGNC Symbol;Acc:HGNC:9063]	2	197804593	198572581	q33.1	1
ENSG00000006576	1623.77	-0.159585	0.0542073	-2.94397	0.00324028	0.04768	down	PHTF2	putative homeodomain transcription factor 2 [Source:HGNC Symbol;Acc:HGNC:13411]	7	77798792	77957503	q11.23	1
ENSG00000072818	330.178	0.211274	0.0717466	2.94472	0.00323243	0.04768	up	ACAP1	ArfGAP with coiled-coil, ankyrin repeat and PH domains 1 [Source:HGNC Symbol;Acc:HGNC:16467]	17	7336529	7351477	p13.1	1
ENSG00000115942	363.804	-0.233442	0.0792505	-2.94562	0.00322311	0.04768	down	ORC2	origin recognition complex subunit 2 [Source:HGNC Symbol;Acc:HGNC:8488]	2	200908977	200963680	q33.1	-1
ENSG00000144320	1588.07	-0.176475	0.0599433	-2.94403	0.00323969	0.04768	down	LNPK	lunapark, ER junction formation factor [Source:HGNC Symbol;Acc:HGNC:21610]	2	175923882	176002839	q31.1	-1
ENSG00000163029	799.701	-0.166872	0.0566776	-2.94422	0.00323766	0.04768	down	SMC6	structural maintenance of chromosomes 6 [Source:HGNC Symbol;Acc:HGNC:20466]	2	17663812	17800242	p24.2	-1
ENSG00000154783	1736.12	-0.192971	0.0655979	-2.94172	0.00326396	0.04796	down	FGD5	FYVE, RhoGEF and PH domain containing 5 [Source:HGNC Symbol;Acc:HGNC:19117]	3	14810853	14934571	p25.1	1
ENSG00000162521	2980.07	-0.109111	0.0371299	-2.93863	0.00329672	0.04837	down	RBBP4	RB binding protein 4, chromatin remodeling factor [Source:HGNC Symbol;Acc:HGNC:9887]	1	32651142	32686211	p35.1	1
ENSG00000072506	684.824	0.181204	0.0617203	2.93589	0.00332587	0.04874	up	HSD17B10	hydroxysteroid 17-beta dehydrogenase 10 [Source:HGNC Symbol;Acc:HGNC:4800]	X	53431258	53434373	p11.22	-1
ENSG00000105372	6254.5	0.188084	0.0640733	2.93545	0.00333069	0.04874	up	RPS19	ribosomal protein S19 [Source:HGNC Symbol;Acc:HGNC:10402]	19	41860255	41872925	q13.2	1
ENSG00000184117	550.726	0.207392	0.0706836	2.93409	0.0033453	0.04889	up	NIPSNAP1	nipsnap homolog 1 [Source:HGNC Symbol;Acc:HGNC:7827]	22	29554808	29581327	q12.2	-1
ENSG00000165672	5615.32	0.166949	0.0569135	2.93339	0.00335287	0.04893	up	PRDX3	peroxiredoxin 3 [Source:HGNC Symbol;Acc:HGNC:9354]	10	119167720	119178812	q26.11	-1
ENSG00000141971	341.182	0.275536	0.0939536	2.93268	0.0033605	0.04898	up	MVB12A	multivesicular body subunit 12A [Source:HGNC Symbol;Acc:HGNC:25153]	19	17405722	17433724	p13.11	1
ENSG00000100350	242.257	-0.289933	0.0989066	-2.93138	0.0033746	0.04911	down	FOXRED2	FAD dependent oxidoreductase domain containing 2 [Source:HGNC Symbol;Acc:HGNC:26264]	22	36487190	36507101	q12.3	-1
ENSG00000136877	2073.07	0.236493	0.0806866	2.931	0.0033787	0.04911	up	FPGS	folylpolyglutamate synthase [Source:HGNC Symbol;Acc:HGNC:3824]	9	127794597	127814327	q34.11	1
ENSG00000087087	2011.34	-0.107624	0.0367455	-2.92891	0.00340148	0.04931	down	SRRT	serrate, RNA effector molecule [Source:HGNC Symbol;Acc:HGNC:24101]	7	100875103	100888664	q22.1	1
ENSG00000166002	1237.7	0.204035	0.0696594	2.92905	0.00340005	0.04931	up	SMCO4	single-pass membrane protein with coiled-coil domains 4 [Source:HGNC Symbol;Acc:HGNC:24810]	11	93478472	93543391	q21	-1
ENSG00000135837	2065.95	-0.196698	0.0671817	-2.92785	0.00341316	0.04941	down	CEP350	centrosomal protein 350 [Source:HGNC Symbol;Acc:HGNC:24238]	1	179954773	180114875	q25.2	1
ENSG00000130741	3772.24	-0.148859	0.0508543	-2.92716	0.00342072	0.04945	down	EIF2S3	eukaryotic translation initiation factor 2 subunit gamma [Source:HGNC Symbol;Acc:HGNC:3267]	X	24054946	24078810	p22.11	1
ENSG00000010810	212.62	0.300068	0.102588	2.92498	0.00344479	0.04967	up	FYN	FYN proto-oncogene, Src family tyrosine kinase [Source:HGNC Symbol;Acc:HGNC:4037]	6	111660332	111873452	q21	-1
ENSG00000233223	645.84	0.253915	0.0868047	2.92513	0.00344316	0.04967	up		novel transcript, antisense to MPDU1 and CD68	17	7581964	7584086	p13.1	-1
ENSG00000108424	7565.96	-0.10675	0.0365071	-2.9241	0.00345459	0.04974	down	KPNB1	karyopherin subunit beta 1 [Source:HGNC Symbol;Acc:HGNC:6400]	17	47649476	47685505	q21.32	1
ENSG00000010270	1118.71	0.141909	0.0485662	2.92197	0.00347828	0.04995	up	STARD3NL	STARD3 N-terminal like [Source:HGNC Symbol;Acc:HGNC:19169]	7	38178222	38230671	p14.1	1
ENSG00000117525	1203.86	-0.242202	0.0829331	-2.92045	0.00349522	0.04995	down	F3	coagulation factor III, tissue factor [Source:HGNC Symbol;Acc:HGNC:3541]	1	94529173	94541759	p21.3	-1
ENSG00000164096	2389.5	0.147866	0.0506325	2.92038	0.0034961	0.04995	up	C4orf3	chromosome 4 open reading frame 3 [Source:HGNC Symbol;Acc:HGNC:19225]	4	119296419	119304445	q26	-1
ENSG00000165240	915.839	-0.209561	0.0717606	-2.92029	0.00349711	0.04995	down	ATP7A	ATPase copper transporting alpha [Source:HGNC Symbol;Acc:HGNC:869]	X	77910656	78050395	q21.1	1
ENSG00000241399	85.9022	0.440652	0.150886	2.92043	0.00349551	0.04995	up	CD302	CD302 molecule [Source:HGNC Symbol;Acc:HGNC:30843]	2	159768628	159798255	q24.2	-1
ENSG00000244187	239.88	0.295367	0.101108	2.92132	0.00348555	0.04995	up	TMEM141	transmembrane protein 141 [Source:HGNC Symbol;Acc:HGNC:28211]	9	136791344	136793317	q34.3	1
