# Supplementary material for: The antibiotic bedaquiline activates host macrophage innate immune resistance to bacterial infection
Source: eLife. 2020 May 4;9:e55692. doi: 10.7554/eLife.55692 (PMC7200153; doi:10.7554/eLife.55692)
Supplement: Figure 5—source data 5. — FDR < 0.05. [file elife-55692-fig5-data5.xlsx]

## Sheet: Feuil1
ensembl_gene_id	baseMean	log2FoldChange	lfcSE	stat	pvalue	padj	direction	hgnc_symbol	description	chromosome_name	start_position	end_position	band	strand
ENSG00000167552	6949.55	0.197889	0.030717	6.44234	1.17642e-10	7.966e-07	up	TUBA1A	tubulin alpha 1a [Source:HGNC Symbol;Acc:HGNC:20766]	12	49184795	49189080	q13.12	-1
ENSG00000169403	4333.36	0.281748	0.0512349	5.49913	3.81662e-08	0.0001292	up	PTAFR	platelet activating factor receptor [Source:HGNC Symbol;Acc:HGNC:9582]	1	28147166	28193936	p35.3	-1
ENSG00000123342	4118.98	-0.188723	0.0408671	-4.61797	3.87515e-06	0.008746	down	MMP19	matrix metallopeptidase 19 [Source:HGNC Symbol;Acc:HGNC:7165]	12	55835433	55842966	q13.2	-1
ENSG00000071967	1030.12	0.197177	0.0450373	4.37808	1.19727e-05	0.01158	up	CYBRD1	cytochrome b reductase 1 [Source:HGNC Symbol;Acc:HGNC:20797]	2	171522247	171558129	q31.1	1
ENSG00000072694	534.017	0.365274	0.0819345	4.45812	8.26824e-06	0.01158	up	FCGR2B	Fc fragment of IgG receptor IIb [Source:HGNC Symbol;Acc:HGNC:3618]	1	161663147	161678654	q23.3	1
ENSG00000082996	5722.57	0.143799	0.0326888	4.39904	1.08732e-05	0.01158	up	RNF13	ring finger protein 13 [Source:HGNC Symbol;Acc:HGNC:10057]	3	149812708	149962139	q25.1	1
ENSG00000127951	771.06	0.360793	0.0821378	4.39253	1.12039e-05	0.01158	up	FGL2	fibrinogen like 2 [Source:HGNC Symbol;Acc:HGNC:3696]	7	77193369	77199848	q11.23	-1
ENSG00000101916	1107.23	0.32952	0.0812701	4.05463	5.02133e-05	0.034	up	TLR8	toll like receptor 8 [Source:HGNC Symbol;Acc:HGNC:15632]	X	12906620	12923169	p22.2	1
ENSG00000111269	1833.34	0.174425	0.0427709	4.07813	4.53999e-05	0.034	up	CREBL2	cAMP responsive element binding protein like 2 [Source:HGNC Symbol;Acc:HGNC:2350]	12	12611827	12645108	p13.1	1
ENSG00000134668	3502.84	-0.206712	0.0506995	-4.0772	4.55822e-05	0.034	down	SPOCD1	SPOC domain containing 1 [Source:HGNC Symbol;Acc:HGNC:26338]	1	31790422	31816051	p35.2	-1
ENSG00000129675	1403.8	0.199104	0.0497533	4.00181	6.28586e-05	0.03869	up	ARHGEF6	Rac/Cdc42 guanine nucleotide exchange factor 6 [Source:HGNC Symbol;Acc:HGNC:685]	X	136665547	136780932	q26.3	-1
